# Supplementary material for: Electrochemical collective synthesis of labeled pyrroloindoline alkaloids with Freon-type methanes as functional C1 synthons
Source: Royal Society of Chemistry journal article supplement (doi:10.1039/d2cc03301a), 2022-01-01

*Supporting Information*

**Electrochemical Collective Synthesis of Labeled Pyrroloindoline**

**Alkaloids with Freon-type Methanes as Functional C1 Synthons**

Chao Chen, Ru-Xin Liu, Feng Xiong, Zi-Hao Li, Jun-Chen Kang, Tong-Mei Ding,\*  
Shu-Yu Zhang\*

---

Shanghai Key Laboratory for Molecular Engineering of Chiral Drugs & School of Chemistry  
and Chemical Engineering, Key Laboratory for Thin Film and Microfabrication of Ministry of  
Education, Shanghai Jiao Tong University, Shanghai 200240, P.R. China.

E-mail: [zhangsy16@sjtu.edu.cn](mailto:zhangsy16@sjtu.edu.cn)

E-mail: [dtm@sjtu.edu.cn](mailto:dtm@sjtu.edu.cn)

**Contents**

|                                                              |     |
|--------------------------------------------------------------|-----|
| 1. General information                                       | S2  |
| 2. Cyclic voltammetry studies                                | S3  |
| 3. Optimization table of reaction conditions                 | S3  |
| 4. General procedure for electrochemical radical cyclization | S4  |
| 5. Mechanistic studies                                       | S22 |
| 6. Synthetic applications                                    | S25 |
| 7. X-ray structure of compound <b>32</b> , <b>51</b>         | S40 |
| 8. Reference                                                 | S41 |
| 9. NMR spectra for products                                  | S42 |

## 1. General information

**Reagents:** All commercial materials were used as received from Energy Chemical or Adamas-beta, Alfa Aesar, Acros, Bidepharm and Leyan unless otherwise noted.

**Reactions:** All reactions were carried out in undivided electrochemical cells (10 mL) using pre-dried glassware, if not noted otherwise. The electrochemical cells were fitted with a rubber stopper with electrical feed-throughs. Electrocatalysis was conducted using an DC-power supplier HY3005ET in constant current mode, CV studies were performed using a CHI660E workstation.

**Chromatography:** Thin layer chromatography (TLC) was carried out on silica gel 60 F254 pre-coated glass plates. Visualization was detected by irradiation with UV light (254 nm), or by treatment with a solution of phosphomolybdic acid in ethanol followed by heating. Flash chromatography was carried out on 200 – 300 mesh silica gel, eluting with a mixture of petroleum ether (b.p. 60 – 90 °C) and ethyl acetate.

**NMR Spectroscopy:**  $^1\text{H}$  NMR and  $^{13}\text{C}$  NMR spectra were recorded on a Bruker AVANCE III HD 400, 500, 600 or 700 M spectrometer, operating at 400 (or 500 or 600 or 700) MHz and 100 (or 125 or 150 or 175) MHz respectively. Chemical shifts ( $\delta$ ) were given in parts per million (ppm), and referenced relative to residual solvent  $\text{CHCl}_3$  (7.26 ppm) in  $\text{CDCl}_3$ , or tetramethylsilane (0.00 ppm) as an internal standard for  $^1\text{H}$  NMR spectra and deuterated solvent  $\text{CDCl}_3$  (77.0 ppm) for  $^{13}\text{C}$  NMR spectra. Coupling constants ( $J$ ) were reported in hertz (Hz). The following abbreviations are used to indicate the multiplicity of the signals: s = singlet, d = doublet, t = triplet, q = quartet, m = multiplet, and associated combinations, e.g. dd = doublet of doublets.

**Mass Spectrometry:** High-resolution mass spectra (HRMS) were obtained on a Bruker Buker impact II using the electrospray ionization (ESI) technique.

**X-Ray:** X-ray diffraction data were collected on a Bruker APEX-II CCD diffractometer.

**Preparation of substrates:** The acrylamides were prepared according to the related references. <sup>[1-6]</sup>

## 2. Cyclic voltammetry studies

**General information:** Cyclic voltammetry (CV) experiments were conducted in a 20 mL glass vial fitted with a glassy carbon working electrode (3 mm in diameter, BASi), a saturated calomel electrode as reference electrode, and a platinum wire counter electrode. The solution of interest was sparged with nitrogen for 3-5 minutes before data collection. The diagrams were made using OriginLab 8.0.

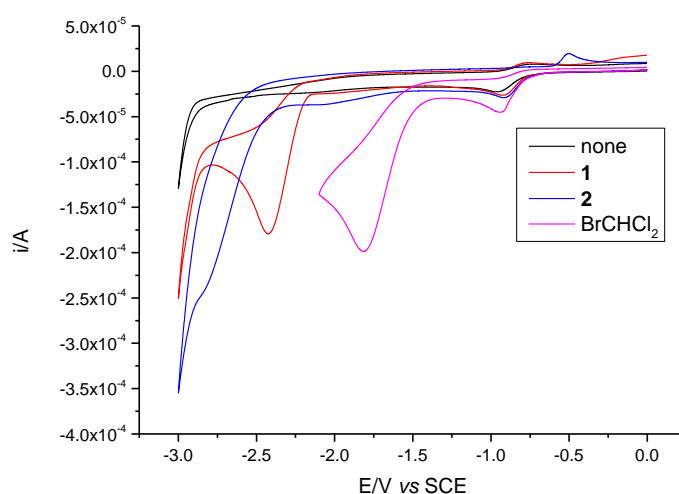

**Fig. S1.** Cyclic voltammogram of **1** (10 mM), **3** (10 mM), and BrCHCl<sub>2</sub> (10 mM) in DMF (10 mL) containing n-Bu<sub>4</sub>NBF<sub>4</sub> (1 mmol). **Scan rate: 50 mV/s.**

## 3. Optimization table of reaction conditions

The desired chlorinated oxindoles could be obtained in 89% yield using a carbon felt as the anode and a foam Ni plate as the cathode, in an undivided cell containing DMF and n-Bu<sub>4</sub>NBF<sub>4</sub> at 100 °C (**Table S1**, entry 1). Decrease of amounts of BrCHCl<sub>2</sub> to 5 equiv. resulted in 79% yield, while reaction temperature of 80 °C resulted in a sharp decrease in the yield (entry 2 and 3). A 66% yield was obtained when DMSO was used as the solvent (entry 4). Then various anodes and cathodes were screened, and Pt cathode, carbon felt cathode, Pt anode and even foam Ni anode can enable the reaction to proceed smoothly, although in lower yield (entries 5-8). A reaction process analysis was conducted to monitor the reaction (see SI), and we found that about 90% of acrylamide **1** was consumed and 81% of product was obtained when the reaction time

was 6 h (entry 9). However, when we conducted the reaction at a current of 10 mA, 3h instead of 5 mA, 6h to ensure the same quantity of electricity in the reaction, the yield decreased to 63%, which indicated that high current density may not be beneficial to the reaction probably because of overreduction of BrCHCl<sub>2</sub> and limited mass transfer rate to the electrode surface (entry 10). Exposure to air instead of Ar atmosphere resulted in a sharp decrease of yield (entry 11), while no products was obtained without electricity, confirming the indispensable role of electricity in the reaction (entry 12).

**Table S1. Optimization.<sup>a</sup>**

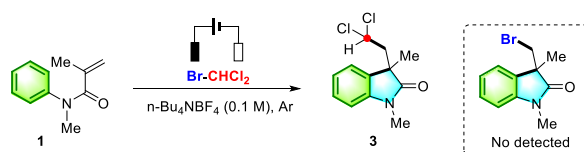

| entry           | (+)/(-) | Reagents (equiv.)                      | yield |
|-----------------|---------|----------------------------------------|-------|
| 1               | C/Ni    | BrCHCl <sub>2</sub> (10), 100 °C, DMF  | 89%   |
| 2               | C/Ni    | BrCHCl <sub>2</sub> (5), 100 °C, DMF   | 79%   |
| 3               | C/Ni    | BrCHCl <sub>2</sub> (10), 80 °C, DMF   | 13%   |
| 4               | C/Ni    | BrCHCl <sub>2</sub> (10), 100 °C, DMSO | 66%   |
| 5               | C/Pt    | BrCHCl <sub>2</sub> (10), 100 °C, DMF  | 76%   |
| 6               | C/C     | BrCHCl <sub>2</sub> (10), 100 °C, DMF  | 88%   |
| 7               | Pt/Ni   | BrCHCl <sub>2</sub> (10), 100 °C, DMF  | 86%   |
| 8               | Ni/Ni   | BrCHCl <sub>2</sub> (10), 100 °C, DMF  | 79%   |
| 9 <sup>b</sup>  | C/Ni    | BrCHCl <sub>2</sub> (10), 100 °C, DMF  | 81%   |
| 10 <sup>c</sup> | C/Ni    | BrCHCl <sub>2</sub> (10), 100 °C, DMF  | 63%   |
| 11 <sup>d</sup> | C/Ni    | BrCHCl <sub>2</sub> (10), 100 °C, DMF  | 22%   |
| 12 <sup>e</sup> | C/Ni    | BrCHCl <sub>2</sub> (10), 100 °C, DMF  | <5%   |

<sup>a</sup>Reaction conditions: acrylamide (0.2 mmol), BrCHCl<sub>2</sub>, solvent (4 mL), n-Bu<sub>4</sub>NBF<sub>4</sub> (0.1 M), Ar, anode area (0.5 cm × 0.5 cm), cathode area (0.5 cm × 0.5 cm), constant current (5 mA, 12h), undivided cell. Isolated yield. <sup>b</sup>5 mA, 6h. <sup>c</sup>10 mA, 3h. <sup>d</sup>Air. <sup>e</sup>No current.

#### 4. General procedure for electrochemical radical cyclization

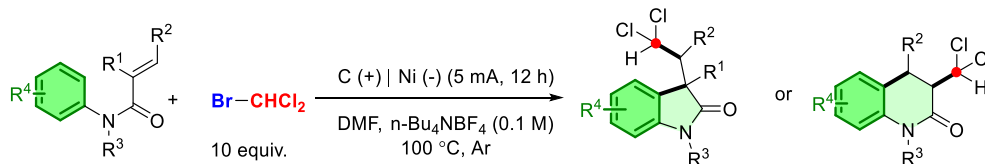

**General procedure 1:** To an oven-dried Schlenk tube equipped with a magnetic stir bar, acrylamide (1 equiv., 0.2 mmol) and n-Bu<sub>4</sub>NBF<sub>4</sub> (0.1 M, 0.4 mmol, 132 mg) were

added. The rubber plug equipped with a carbon felt anode (10 mm \* 10 mm) and a foam Ni cathode (10 mm\* mm) was used to keep the Schlenk tube sealed. The tube was evacuated and filled with Ar, repeating three times. BrCHCl<sub>2</sub> (10 equiv., 2 mmol, 165 μL) was dissolved in 4 mL DMF and then injected into the tube via syringe. The mixture was stirred for 5 min and put in the oil bath (100 °C) with the electrolysis of 5 mA, 12h. After the reaction, the tube was cooled to room temperature and ethyl acetate (10 mL) and water (10 mL) was added. The aqueous layer was separated and extracted with ethyl acetate (3×10 mL), and the combined organic layers were washed with brine and dried over sodium sulfate. Following concentration in vacuo, the crude residue was subjected to flash column chromatography on silica gel to yield the desired product.

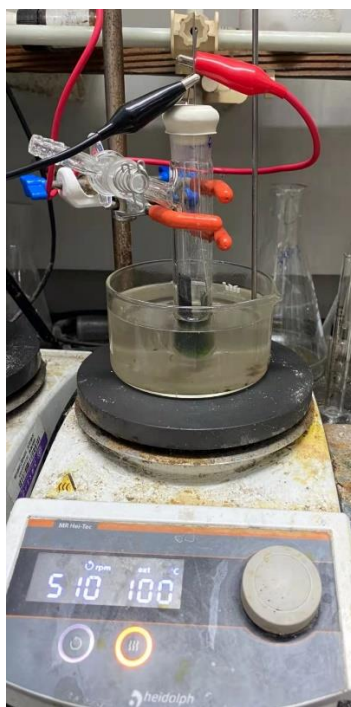

**Fig. S2.** The electrochemical reaction setup.

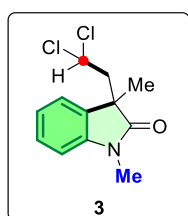

Purification of the crude product by flash column chromatography afforded the cyclization product **3** as colorless oil in 89% yield (46 mg).

**<sup>1</sup>H NMR** (400 MHz, CDCl<sub>3</sub>) δ 7.31 (td, *J* = 7.7, 1.3 Hz, 1H), 7.20 – 7.18 (m, 1H), 7.11 – 7.07 (m, 1H), 6.87 (d, *J* = 7.8 Hz, 1H), 5.38 (dd, *J* = 9.2, 4.1 Hz, 1H), 3.20 (s, 3H), 3.03 (dd, *J* = 14.8, 9.2 Hz, 1H), 2.70 (dd, *J* = 14.8, 4.1 Hz, 1H), 1.39 (s, 3H).

**<sup>13</sup>C NMR** (101 MHz, CDCl<sub>3</sub>) δ 179.0, 143.4, 131.0, 128.6, 122.6, 122.6, 108.6, 69.6, 50.1, 47.1, 26.4, 25.4.

**HRMS** (ESI) *m/z* calculated for C<sub>12</sub>H<sub>13</sub>Cl<sub>2</sub>NNaO [M+Na<sup>+</sup>] 280.0266, found 280.0267.

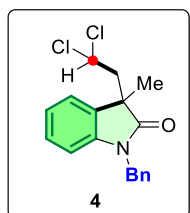

Purification of the crude product by flash column chromatography afforded the cyclization product **4** as pale yellow oil in 52% yield (35 mg).

**<sup>1</sup>H NMR** (400 MHz, CDCl<sub>3</sub>) δ 7.32 – 7.25 (m, 5H), 7.23 – 7.19 (m, 2H), 7.09 – 7.05 (m, 1H), 6.80 – 6.78 (m, 1H), 5.45 (dd, *J* = 8.9, 4.4 Hz, 1H), 5.01 (d, *J* = 15.6 Hz, 1H), 4.81 (d, *J* = 15.6 Hz, 1H), 3.10 (dd, *J* = 14.8, 9.0 Hz, 1H), 2.76 (dd, *J* = 14.8, 4.4 Hz, 1H), 1.45 (s, 3H).

**<sup>13</sup>C NMR** (101 MHz, CDCl<sub>3</sub>) δ 179.0, 142.5, 135.7, 131.1, 128.7, 128.5, 127.7, 127.5, 122.7, 122.7, 109.6, 69.6, 49.9, 47.2, 44.1, 26.1.

**HRMS** (ESI) *m/z* calculated for C<sub>18</sub>H<sub>17</sub>Cl<sub>2</sub>NNaO [M+Na<sup>+</sup>] 356.0579, found 356.0581.

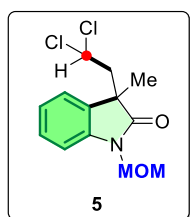

Purification of the crude product by flash column chromatography afforded the cyclization product **5** as colorless oil in 64% yield (37 mg).

**<sup>1</sup>H NMR** (400 MHz, CDCl<sub>3</sub>) δ 7.32 (td, *J* = 7.7, 1.0 Hz, 1H), 7.22 (d, *J* = 6.9 Hz, 1H), 7.15 – 7.11 (m, 1H), 7.08 (d, *J* = 7.8 Hz, 1H), 5.44 (dd, *J* = 9.1, 4.3 Hz, 1H), 5.15 (d, *J* = 10.9 Hz, 1H), 5.08 (d, *J* = 10.9 Hz, 1H), 3.35 (s, 3H), 3.06 (dd, *J* = 14.9, 9.1 Hz, 1H), 2.74 (dd, *J* = 14.9, 4.3 Hz, 1H), 1.42 (s, 3H).

**<sup>13</sup>C NMR** (101 MHz, CDCl<sub>3</sub>) δ 179.6, 141.7, 130.6, 128.7, 123.2, 122.7, 110.1, 71.8, 69.6, 56.5, 49.9, 47.5, 26.3.

**HRMS** (ESI) *m/z* calculated for C<sub>13</sub>H<sub>15</sub>Cl<sub>2</sub>NNaO<sub>2</sub> [M+Na<sup>+</sup>] 310.0372, found 310.0367.

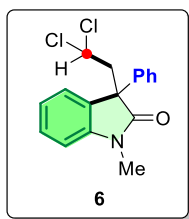

Purification of the crude product by flash column chromatography afforded the cyclization product **6** as white solid in 44% yield (28 mg).

**<sup>1</sup>H NMR** (400 MHz, CDCl<sub>3</sub>) δ 7.34 (td, *J* = 7.7, 0.9 Hz, 1H), 7.27 – 7.18 (m, 6H), 7.13 – 7.09 (m, 1H), 6.87 (d, *J* = 7.9 Hz, 1H), 5.38 (dd, *J* = 9.5, 3.8 Hz, 1H), 3.52 (dd, *J* = 14.7, 9.5 Hz, 1H), 3.11 (s, 3H), 3.02 (dd, *J* = 14.7, 3.8 Hz, 1H).

**<sup>13</sup>C NMR** (101 MHz, CDCl<sub>3</sub>) δ 177.0, 144.4, 139.5, 129.2, 128.7, 128.6, 127.8, 126.4, 125.1, 122.7, 109.0, 69.8, 54.9, 50.1, 26.7.

**HRMS** (ESI) *m/z* calculated for C<sub>17</sub>H<sub>15</sub>Cl<sub>2</sub>NNaO [M+Na<sup>+</sup>] 342.0423, found 342.0420.

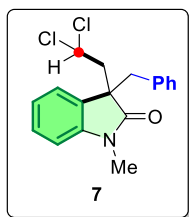

Purification of the crude product by flash column chromatography afforded the cyclization product **7** as white solid in 72% yield (48 mg).

**<sup>1</sup>H NMR** (400 MHz, CDCl<sub>3</sub>) δ 7.25 – 7.22 (m, 1H), 7.14 – 7.02 (m, 5H), 6.79 – 6.76 (m, 2H), 6.61 (d, *J* = 7.8 Hz, 1H), 5.43 (dd, *J* = 9.3, 4.2 Hz, 1H), 3.18 (dd, *J* = 14.8, 9.3 Hz, 1H), 3.10 (d, *J* = 12.8 Hz, 1H), 2.99 (d, *J* = 12.8 Hz, 1H), 2.93 (s, 3H), 2.85 (dd, *J* = 14.8, 4.2 Hz, 1H).

**<sup>13</sup>C NMR** (101 MHz, CDCl<sub>3</sub>) δ 177.5, 144.0, 134.3, 130.0, 128.7, 128.1, 127.5, 126.8, 123.7, 122.1, 108.3, 69.7, 53.0, 48.6, 45.0, 26.0.

**HRMS** (ESI) *m/z* calculated for C<sub>18</sub>H<sub>17</sub>Cl<sub>2</sub>NNaO [M+Na<sup>+</sup>] 356.0579, found 356.0580.

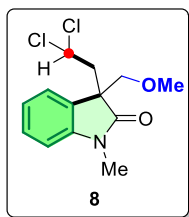

Purification of the crude product by flash column chromatography afforded the cyclization product **8** as pale yellow solid in 77% yield (44 mg).

**<sup>1</sup>H NMR** (400 MHz, CDCl<sub>3</sub>) δ 7.35 – 7.30 (m, 2H), 7.11 – 7.07 (m, 1H), 6.87 (d, *J* = 7.8 Hz, 1H), 6.89 (d, *J* = 7.8 Hz, 1H), 5.40 (dd, *J* = 8.2, 5.3 Hz, 1H), 3.61 (d, *J* = 8.8 Hz, 1H), 3.40 (d, *J* = 8.8 Hz, 1H), 3.25 (s, 3H), 3.19 (s, 3H), 2.97 – 2.94 (m, 2H).

**<sup>13</sup>C NMR** (101 MHz, CDCl<sub>3</sub>) δ 176.5, 144.1, 128.8, 128.1, 124.0, 122.5, 108.4, 76.5, 69.7, 59.5, 52.4, 45.6, 26.5.

**HRMS** (ESI) *m/z* calculated for C<sub>13</sub>H<sub>15</sub>Cl<sub>2</sub>NNaO<sub>2</sub> [M+Na<sup>+</sup>] 310.0372, found 310.0375.

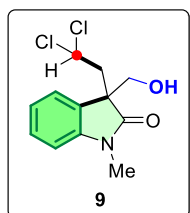

Purification of the crude product by flash column chromatography afforded the cyclization product **9** as pale gray solid in 83% yield (44 mg).

**<sup>1</sup>H NMR** (400 MHz, CDCl<sub>3</sub>) δ 7.36 (td, *J* = 7.7, 1.2 Hz, 1H), 7.25 – 7.23 (m, 1H), 7.12 (td, *J* = 7.5, 0.8 Hz, 1H), 6.90 (d, *J* = 7.8 Hz, 1H), 5.43 (dd, *J* = 9.4, 4.3 Hz, 1H), 3.77 – 3.67 (m, 2H), 3.21 (s, 3H), 3.15 (dd, *J* = 14.9, 9.4 Hz, 1H), 2.85 (dd, *J* = 14.9, 4.2 Hz, 1H), 2.67 (br, 1H).

**<sup>13</sup>C NMR** (101 MHz, CDCl<sub>3</sub>) δ 177.7, 144.2, 129.2, 127.1, 123.3, 122.9, 108.8, 69.7, 67.7, 53.0, 45.5, 26.5.

**HRMS** (ESI) *m/z* calculated for C<sub>12</sub>H<sub>13</sub>Cl<sub>2</sub>NNaO<sub>2</sub> [M+Na<sup>+</sup>] 296.0216, found 296.0214.

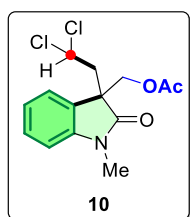

Purification of the crude product by flash column chromatography afforded the cyclization product **10** as colorless oil in 84% yield (53 mg).

**<sup>1</sup>H NMR** (400 MHz, CDCl<sub>3</sub>) δ 7.36 (td, *J* = 7.8, 1.2 Hz, 1H), 7.25 – 7.23 (m, 1H), 7.10 (td, *J* = 7.5, 0.7 Hz, 1H), 6.89 (d, *J* = 7.8 Hz, 1H), 5.44 (dd, *J* = 9.2, 4.2 Hz, 1H), 4.41 (d, *J* = 10.8 Hz, 1H), 4.09 (d, *J* = 10.8 Hz, 1H), 3.22 (s, 3H), 3.03 (dd, *J* = 14.7, 9.3 Hz, 1H), 2.85 (dd, *J* = 14.7, 4.2 Hz, 1H), 1.94 (s, 3H).

**<sup>13</sup>C NMR** (101 MHz, CDCl<sub>3</sub>) δ 175.7, 170.1, 144.2, 129.4, 126.7, 123.8, 122.7, 108.7, 69.1, 67.2, 51.0, 45.5, 26.6, 20.5.

**HRMS** (ESI) *m/z* calculated for C<sub>14</sub>H<sub>15</sub>Cl<sub>2</sub>NNaO<sub>3</sub> [M+Na<sup>+</sup>] 338.0321, found 338.0320.



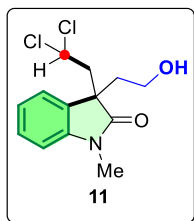

Purification of the crude product by flash column chromatography afforded the cyclization product **11** as colorless oil in 59% yield (34 mg).

**<sup>1</sup>H NMR** (400 MHz, CDCl<sub>3</sub>) δ 7.34 (td, *J* = 7.7, 1.2 Hz, 1H), 7.20 – 7.18 (m, 1H), 7.14 – 7.10 (m, 1H), 6.89 (d, *J* = 7.8 Hz, 1H), 5.36 (dd, *J* = 9.1, 4.1 Hz, 1H), 3.56 – 3.49 (m, 1H), 3.45 – 3.39 (m, 1H), 3.20 (s, 3H), 3.13 – 3.06 (m, 1H), 2.76 (dd, *J* = 14.8, 4.1 Hz, 1H), 2.24 – 2.17 (m, 1H), 2.04 – 1.97 (m, 1H), 1.90 (br, 1H).

**<sup>13</sup>C NMR** (101 MHz, CDCl<sub>3</sub>) δ 178.9, 143.9, 129.0, 123.0, 122.9, 108.8, 69.3, 58.4, 49.9, 49.7, 41.2, 26.5.

**HRMS** (ESI) *m/z* calculated for C<sub>13</sub>H<sub>15</sub>Cl<sub>2</sub>NNaO<sub>2</sub> [M+Na<sup>+</sup>] 310.0372, found 310.0372.

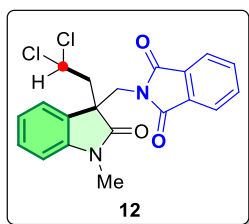

Purification of the crude product by flash column chromatography afforded the cyclization product **12** as white solid in 72% yield (58 mg).

**<sup>1</sup>H NMR** (400 MHz, CDCl<sub>3</sub>) δ 7.80 (dd, *J* = 5.5, 3.0 Hz, 2H), 7.70 (dd, *J* = 5.5, 3.1 Hz, 2H), 7.29 (td, *J* = 7.8, 1.2 Hz, 1H), 7.20 – 7.18 (m, 1H), 7.03 (td, *J* = 7.5, 0.8 Hz, 1H), 6.83 (d, *J* = 7.8 Hz, 1H), 5.41 (dd, *J* = 8.6, 4.9 Hz, 1H), 4.01 (d, *J* = 14.1 Hz, 1H), 3.94 (d, *J* = 14.1 Hz, 1H), 3.22 – 3.16 (m, 4H), 3.04 (dd, *J* = 14.9, 4.9 Hz, 1H).

**<sup>13</sup>C NMR** (101 MHz, CDCl<sub>3</sub>) δ 176.1, 167.9, 144.0, 134.1, 131.6, 129.3, 126.8, 123.7, 123.5, 122.5, 108.7, 69.3, 51.4, 47.0, 44.1, 26.6.

**HRMS** (ESI) *m/z* calculated for C<sub>20</sub>H<sub>16</sub>Cl<sub>2</sub>N<sub>2</sub>NaO<sub>3</sub> [M+Na<sup>+</sup>] 425.0430, found 425.0429.

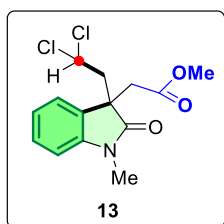

Purification of the crude product by flash column chromatography afforded the

cyclization product **13** as colorless oil in 87% yield (55 mg).

**<sup>1</sup>H NMR** (400 MHz, CDCl<sub>3</sub>) δ 7.34 (td, *J* = 7.7, 1.2 Hz, 1H), 7.28 – 7.26 (m, 1H), 7.08 (td, *J* = 7.5, 0.8 Hz, 1H), 6.89 (d, *J* = 7.8 Hz, 1H), 5.42 (dd, *J* = 8.4, 4.6 Hz, 1H), 3.50 (s, 3H), 3.23 (s, 3H), 3.00 – 2.88 (m, 4H).

**<sup>13</sup>C NMR** (101 MHz, CDCl<sub>3</sub>) δ 177.4, 169.5, 144.3, 129.2, 128.3, 123.3, 122.6, 108.6, 68.9, 51.7, 49.0, 48.5, 41.4, 26.6.

**HRMS** (ESI) *m/z* calculated for C<sub>14</sub>H<sub>15</sub>Cl<sub>2</sub>NNaO<sub>3</sub> [M+Na<sup>+</sup>] 338.0321, found 338.0318.

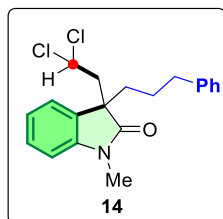

Purification of the crude product by flash column chromatography afforded the cyclization product **14** as colorless cream in 84% yield (61 mg).

**<sup>1</sup>H NMR** (400 MHz, CDCl<sub>3</sub>) δ 7.32 – 7.28 (m, 1H), 7.23 – 7.19 (m, 2H), 7.15 – 7.06 (m, 3H), 7.01 (d, *J* = 7.0 Hz, 2H), 6.84 (d, *J* = 7.8 Hz, 1H), 5.34 (dd, *J* = 9.3, 4.0 Hz, 1H), 3.17 (s, 3H), 3.00 (dd, *J* = 14.8, 9.4 Hz, 1H), 2.68 (dd, *J* = 14.8, 4.0 Hz, 1H), 2.55 – 2.38 (m, 2H), 2.00 – 1.92 (m, 1H), 1.78 – 1.71 (m, 1H), 1.39 – 1.25 (m, 1H), 1.15 – 1.04 (m, 1H).

**<sup>13</sup>C NMR** (101 MHz, CDCl<sub>3</sub>) δ 178.2, 144.2, 141.4, 129.1, 128.6, 128.3, 128.2, 125.8, 122.8, 122.6, 108.4, 69.5, 51.4, 49.9, 38.7, 35.6, 26.3, 25.0.

**HRMS** (ESI) *m/z* calculated for C<sub>20</sub>H<sub>21</sub>Cl<sub>2</sub>NNaO [M+Na<sup>+</sup>] 384.0892, found 384.0894.

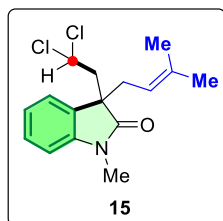

Purification of the crude product by flash column chromatography afforded the cyclization product **15** as colorless oil in 58% yield (36 mg).

**<sup>1</sup>H NMR** (400 MHz, CDCl<sub>3</sub>) δ 7.31 (td, *J* = 7.7, 1.1 Hz, 1H), 7.17 (d, *J* = 7.2 Hz, 1H), 7.09 – 7.05 (m, 1H), 6.85 (d, *J* = 7.7 Hz, 1H), 5.37 (dd, *J* = 9.4, 4.2 Hz, 1H), 4.87 – 4.83 (m, 1H), 3.19 (s, 3H), 3.01 (dd, *J* = 14.8, 9.4 Hz, 1H), 2.76 (dd, *J* = 14.8, 4.2 Hz, 1H), 2.50 – 2.37 (m, 2H), 1.60 (s, 3H), 1.48 (s, 3H).

**$^{13}\text{C}$  NMR** (101 MHz,  $\text{CDCl}_3$ )  $\delta$  178.4, 144.0, 136.7, 129.2, 128.5, 123.4, 122.3, 116.5, 108.3, 69.9, 51.6, 48.3, 37.3, 26.4, 25.9, 18.0.

**HRMS** (ESI)  $m/z$  calculated for  $\text{C}_{16}\text{H}_{19}\text{Cl}_2\text{NNaO}$  [ $\text{M}+\text{Na}^+$ ] 334.0736, found 334.0735.

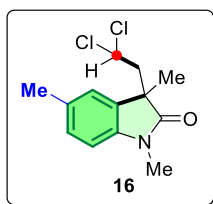

Purification of the crude product by flash column chromatography afforded the cyclization product **16** as colorless oil in 62% yield (34 mg).

**$^1\text{H}$  NMR** (400 MHz,  $\text{CDCl}_3$ )  $\delta$  7.12 – 7.10 (m, 1H), 7.00 – 6.99 (m, 1H), 6.76 (d,  $J = 7.9$  Hz, 1H), 5.40 (dd,  $J = 9.4, 4.0$  Hz, 1H), 3.18 (s, 3H), 3.02 (dd,  $J = 14.8, 9.3$  Hz, 1H), 2.68 (dd,  $J = 14.8, 4.0$  Hz, 1H), 2.36 (s, 3H), 1.38 (s, 3H).

**$^{13}\text{C}$  NMR** (101 MHz,  $\text{CDCl}_3$ )  $\delta$  178.9, 141.0, 132.2, 131.1, 128.9, 123.4, 108.3, 69.7, 50.2, 47.2, 26.4, 25.4, 21.1.

**HRMS** (ESI)  $m/z$  calculated for  $\text{C}_{13}\text{H}_{15}\text{Cl}_2\text{NNaO}$  [ $\text{M}+\text{Na}^+$ ] 294.0423, found 294.0424.

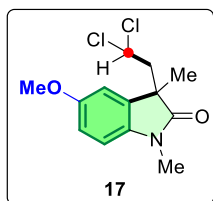

Purification of the crude product by flash column chromatography afforded the cyclization product **17** as pale yellow solid in 75% yield (43 mg).

**$^1\text{H}$  NMR** (400 MHz,  $\text{CDCl}_3$ )  $\delta$  6.84 – 6.75 (m, 3H), 5.41 (dd,  $J = 9.1, 4.2$  Hz, 1H), 3.80 (s, 3H), 3.17 (s, 3H), 3.01 (dd,  $J = 14.8, 9.2$  Hz, 1H), 2.66 (dd,  $J = 14.8, 4.2$  Hz, 1H), 1.37 (s, 3H).

**$^{13}\text{C}$  NMR** (101 MHz,  $\text{CDCl}_3$ )  $\delta$  178.6, 156.1, 136.8, 132.4, 112.3, 110.5, 108.8, 69.6, 55.8, 50.1, 47.5, 26.5, 25.4.

**HRMS** (ESI)  $m/z$  calculated for  $\text{C}_{13}\text{H}_{15}\text{Cl}_2\text{NNaO}_2$  [ $\text{M}+\text{Na}^+$ ] 310.0372, found 310.0371.

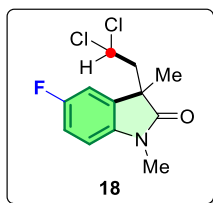

Purification of the crude product by flash column chromatography afforded the

cyclization product **18** as pale yellow solid in 89% yield (49 mg).

**<sup>1</sup>H NMR** (400 MHz, CDCl<sub>3</sub>) δ 7.01 (td, *J* = 8.7, 2.5 Hz, 1H), 6.95 (dd, *J* = 7.7, 2.5 Hz, 1H), 6.79 (dd, *J* = 8.5, 4.0 Hz, 1H), 5.41 (dd, *J* = 8.8, 4.6 Hz, 1H), 3.18 (s, 3H), 3.01 (dd, *J* = 14.8, 8.8 Hz, 1H), 2.68 (dd, *J* = 14.9, 4.6 Hz, 1H), 1.38 (s, 3H).

**<sup>13</sup>C NMR** (101 MHz, CDCl<sub>3</sub>) δ 178.5, 159.2 (d, *J* = 241.4 Hz), 139.3 (d, *J* = 1.6 Hz), 132.8 (d, *J* = 7.8 Hz), 114.8 (d, *J* = 23.4 Hz), 110.9 (d, *J* = 24.7 Hz), 109.1 (d, *J* = 8.1 Hz), 69.3, 49.9, 47.6 (d, *J* = 1.7 Hz), 26.5, 25.4.

**HRMS** (ESI) *m/z* calculated for C<sub>12</sub>H<sub>12</sub>Cl<sub>2</sub>FNNaO [M+Na<sup>+</sup>] 298.0172, found 298.0172.

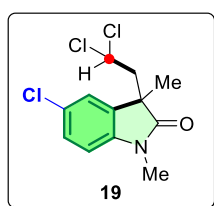

Purification of the crude product by flash column chromatography afforded the cyclization product **19** as white solid in 85% yield (50 mg).

**<sup>1</sup>H NMR** (400 MHz, CDCl<sub>3</sub>) δ 7.29 (dd, *J* = 8.3, 2.1 Hz, 1H), 7.18 (d, *J* = 2.0 Hz, 1H), 6.79 (d, *J* = 8.3 Hz, 1H), 5.41 (dd, *J* = 9.0, 4.5 Hz, 1H), 3.80 (s, 3H), 3.19 (s, 3H), 3.03 (dd, *J* = 14.9, 9.0 Hz, 1H), 2.68 (dd, *J* = 14.9, 4.5 Hz, 1H), 1.39 (s, 3H).

**<sup>13</sup>C NMR** (101 MHz, CDCl<sub>3</sub>) δ 178.4, 142.0, 132.9, 128.6, 128.1, 123.2, 109.5, 69.3, 49.9, 47.4, 26.6, 25.4.

**HRMS** (ESI) *m/z* calculated for C<sub>12</sub>H<sub>12</sub>Cl<sub>3</sub>NNaO [M+Na<sup>+</sup>] 313.9877, found 313.9877.

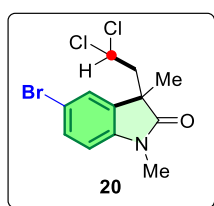

Purification of the crude product by flash column chromatography afforded the cyclization product **20** as pale yellow solid in 87% yield (58 mg).

**<sup>1</sup>H NMR** (400 MHz, CDCl<sub>3</sub>) δ 7.43 (dd, *J* = 8.1, 1.6 Hz, 1H), 7.31 (d, *J* = 1.7 Hz, 1H), 6.75 (d, *J* = 8.4 Hz, 1H), 5.40 (dd, *J* = 9.2, 4.8 Hz, 1H), 3.18 (s, 3H), 3.01 (dd, *J* = 14.8, 8.8 Hz, 1H), 2.68 (dd, *J* = 14.8, 4.4 Hz, 1H), 1.38 (s, 3H).

**<sup>13</sup>C NMR** (101 MHz, CDCl<sub>3</sub>) δ 178.3, 142.2, 133.2, 131.5, 125.9, 115.3, 110.0, 69.3, 49.8, 47.3, 26.5, 25.4.

**HRMS** (ESI)  $m/z$  calculated for  $C_{12}H_{12}BrCl_2NNaO$   $[M+Na^+]$  357.9372, found 357.9370.

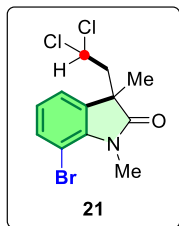

Purification of the crude product by flash column chromatography afforded the cyclization product **21** as colorless oil in 77% yield (52 mg).

**$^1H$  NMR** (400 MHz,  $CDCl_3$ )  $\delta$  7.41 (dd,  $J = 8.2, 1.0$  Hz, 1H), 7.10 (dd,  $J = 7.3, 1.0$  Hz, 1H), 6.95 – 6.92 (m, 1H), 5.38 (dd,  $J = 9.0, 4.4$  Hz, 1H), 3.58 (s, 3H), 3.02 (dd,  $J = 14.8, 9.0$  Hz, 1H), 2.67 (dd,  $J = 14.8, 4.4$  Hz, 1H), 1.38 (s, 3H).

**$^{13}C$  NMR** (101 MHz,  $CDCl_3$ )  $\delta$  179.3, 140.8, 134.3, 134.2, 123.8, 121.7, 103.0, 69.3, 50.2, 46.9, 30.0, 25.8.

**HRMS** (ESI)  $m/z$  calculated for  $C_{12}H_{12}BrCl_2NNaO$   $[M+Na^+]$  357.9372, found 357.9371.

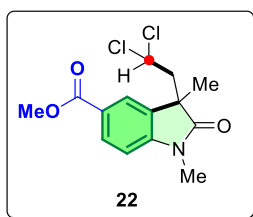

Purification of the crude product by flash column chromatography afforded the cyclization product **22** as pale yellow solid in 57% yield (36 mg).

**$^1H$  NMR** (400 MHz,  $CDCl_3$ )  $\delta$  8.06 (dd,  $J = 8.2, 1.7$  Hz, 1H), 7.87 (d,  $J = 1.5$  Hz, 1H), 6.90 (d,  $J = 8.2$  Hz, 1H), 5.37 (dd,  $J = 9.2, 4.3$  Hz, 1H), 3.92 (s, 3H), 3.23 (s, 3H), 3.05 (dd,  $J = 14.9, 9.3$  Hz, 1H), 2.75 (dd,  $J = 14.9, 4.3$  Hz, 1H), 1.41 (s, 3H).

**$^{13}C$  NMR** (101 MHz,  $CDCl_3$ )  $\delta$  179.3, 166.6, 147.5, 131.3, 131.1, 124.6, 123.9, 108.1, 69.4, 52.1, 49.8, 47.0, 26.6, 25.4.

**HRMS** (ESI)  $m/z$  calculated for  $C_{14}H_{15}Cl_2NNaO_3$   $[M+Na^+]$  338.0321, found 338.0318.

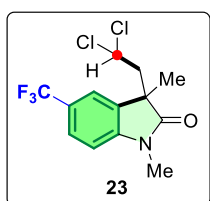

Purification of the crude product by flash column chromatography afforded the cyclization product **23** as colorless oil in 25% yield (16 mg).

**<sup>1</sup>H NMR** (400 MHz, CDCl<sub>3</sub>) δ 7.61 (d, *J* = 8.1 Hz, 1H), 7.43 (s, 1H), 6.95 (d, *J* = 8.2 Hz, 1H), 5.39 (dd, *J* = 8.9, 4.6 Hz, 1H), 3.24 (s, 3H), 3.06 (dd, *J* = 14.9, 8.9 Hz, 1H), 2.75 (dd, *J* = 14.9, 4.6 Hz, 1H), 1.42 (s, 3H).

**<sup>13</sup>C NMR** (101 MHz, CDCl<sub>3</sub>) δ 178.9, 146.3, 131.8, 126.5 (q, *J* = 3.9 Hz, 1H), 125.0 (q, *J* = 32.8 Hz, 1H), 124.2 (q, *J* = 271.6 Hz, 1H), 119.7 (d, *J* = 3.5 Hz, 1H), 108.4, 69.2 (d, *J* = 5.6 Hz, 1H), 49.8, 47.1, 26.7, 25.4.

**HRMS** (ESI) *m/z* calculated for C<sub>13</sub>H<sub>12</sub>Cl<sub>2</sub>F<sub>3</sub>NNaO [M+Na<sup>+</sup>] 348.0140, found 348.0141.

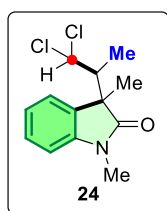

Purification of the crude product by flash column chromatography afforded the cyclization product **24** as colorless oil in 68% yield (37 mg, a mixture of diastereoisomers, d.r. ~ 4.1:1).

**<sup>1</sup>H NMR** (400 MHz, CDCl<sub>3</sub>) δ 7.34 – 7.26 (m, 1H), 7.21 (d, *J* = 7.1 Hz, 1H), 7.11 – 7.03 (m, 1H), 6.88 – 6.84 (m, 1H), 5.77 (d, *J* = 2.8 Hz, 0.19H), 5.65 (d, *J* = 1.6 Hz, 0.77H), 3.24 (s, 0.6H), 3.17 (s, 2.4H), 2.82 – 2.76 (m, 0.2H), 2.71 – 2.66 (m, 0.8H), 1.54 – 1.51 (m, 3H), 1.45 – 1.42 (m, 3H).

**<sup>13</sup>C NMR** (101 MHz, CDCl<sub>3</sub>) δ 179.3, 178.0, 143.2, 131.9, 131.0, 128.5, 128.2, 124.3, 122.8, 122.6, 122.5, 108.4, 108.3, 75.3, 75.0, 51.6, 50.6, 50.0, 49.5, 26.3, 26.2, 23.5, 22.8, 9.0, 7.5.

**HRMS** (ESI) *m/z* calculated for C<sub>13</sub>H<sub>15</sub>Cl<sub>2</sub>NNaO [M+Na<sup>+</sup>] 294.0423, found 294.0421.

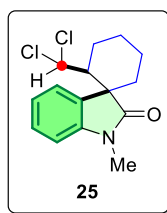

Purification of the crude product by flash column chromatography afforded the cyclization product **25** in 41% yield (25 mg, diastereoisomers can be isolated with d.r.

~ 1.2:1).

**25-up** (pale yellow solid):

**<sup>1</sup>H NMR** (400 MHz, CDCl<sub>3</sub>) δ 7.33 – 7.28 (m, 1H), 7.13 – 7.07 (m, 2H), 6.84 (d, *J* = 7.8 Hz, 1H), 5.35 (s, 1H), 3.15 (s, 3H), 2.54 – 2.46 (m, 2H), 2.43 – 2.31 (m, 1H), 2.14 – 2.11 (m, 2H), 1.82 – 1.73 (m, 2H), 1.60 – 1.47 (m, 2H).

**<sup>13</sup>C NMR** (101 MHz, CDCl<sub>3</sub>) δ 177.1, 143.3, 131.8, 128.5, 122.7, 121.6, 108.1, 73.9, 55.8, 49.3, 36.6, 26.1, 25.5, 20.1, 19.3.

**HRMS** (ESI) *m/z* calculated for C<sub>15</sub>H<sub>17</sub>Cl<sub>2</sub>NNaO [M+Na<sup>+</sup>] 320.0579, found 320.0580.

**25-down** (pale yellow solid):

**<sup>1</sup>H NMR** (400 MHz, CDCl<sub>3</sub>) δ 7.51 (d, *J* = 7.5 Hz, 1H), 7.33 (t, *J* = 7.8 Hz, 1H), 7.04 (t, *J* = 7.4 Hz, 1H), 6.90 (d, *J* = 7.8 Hz, 1H), 5.24 (d, *J* = 6.2 Hz, 1H), 3.23 (s, 3H), 2.83 – 2.77 (m, 1H), 2.41 – 2.36 (m, 1H), 2.11 – 2.08 (m, 1H), 1.95 – 1.88 (m, 1H), 1.85 – 1.65 (m, 4H), 1.48 – 1.42 (m, 1H).

**<sup>13</sup>C NMR** (101 MHz, CDCl<sub>3</sub>) δ 179.6, 143.4, 130.0, 128.2, 125.7, 121.8, 108.6, 75.1, 51.5, 51.5, 36.6, 26.6, 24.9, 24.6, 20.9.

**HRMS** (ESI) *m/z* calculated for C<sub>15</sub>H<sub>17</sub>Cl<sub>2</sub>NNaO [M+Na<sup>+</sup>] 320.0579, found 320.0581.

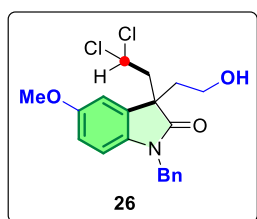

Purification of the crude product by flash column chromatography afforded the cyclization product **26** as pale yellow oil in 49% yield (38 mg).

**<sup>1</sup>H NMR** (400 MHz, CDCl<sub>3</sub>) δ 7.34 – 7.27 (m, 5H), 6.79 (d, *J* = 2.4 Hz, 1H), 6.75 – 6.72 (m, 1H), 6.69 – 6.67 (m, 1H), 5.44 (dd, *J* = 8.8, 4.4 Hz, 1H), 5.01 (d, *J* = 15.6 Hz, 1H), 4.72 (d, *J* = 15.6 Hz, 1H), 3.60 – 3.54 (m, 1H), 3.51 – 3.45 (m, 1H), 3.13 (dd, *J* = 14.8, 8.8 Hz, 1H), 2.76 (dd, *J* = 14.8, 4.4 Hz, 1H), 2.28 – 2.21 (m, 1H), 2.06 – 1.99 (m, 1H).

**<sup>13</sup>C NMR** (101 MHz, CDCl<sub>3</sub>) δ 178.6, 156.2, 136.6, 135.6, 130.6, 128.8, 127.7, 127.6, 112.6, 110.8, 110.2, 69.2, 58.5, 55.8, 50.3, 49.8, 44.5, 41.6

**HRMS** (ESI) *m/z* calculated for C<sub>20</sub>H<sub>21</sub>Cl<sub>2</sub>NNaO<sub>3</sub> [M+Na<sup>+</sup>] 416.0791, found 416.0785.

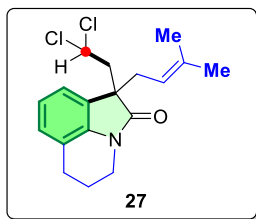

Purification of the crude product by flash column chromatography afforded the cyclization product **27** as colorless oil in 74% yield (50 mg).

**<sup>1</sup>H NMR** (400 MHz, CDCl<sub>3</sub>) δ 7.06 – 7.04 (m, 1H), 7.01 – 7.00 (m, 1H), 6.97 – 6.93 (m, 1H), 5.37 (dd, *J* = 9.6, 3.9 Hz, 1H), 4.93 – 4.89 (m, 1H), 3.73 – 3.62 (m, 2H), 2.99 (dd, *J* = 14.8, 9.6 Hz, 1H), 2.79 – 2.73 (m, 3H), 2.48 (dd, *J* = 14.0, 7.7 Hz, 1H), 2.36 (dd, *J* = 14.0, 7.5 Hz, 1H), 1.99 – 1.93 (m, 2H), 1.62 (s, 3H), 1.50 (s, 3H).

**<sup>13</sup>C NMR** (101 MHz, CDCl<sub>3</sub>) δ 177.3, 139.8, 136.6, 127.6, 127.3, 121.7, 121.3, 120.4, 116.8, 70.2, 52.8, 48.0, 39.0, 36.9, 25.9, 24.7, 21.1, 18.1.

**HRMS** (ESI) *m/z* calculated for C<sub>18</sub>H<sub>21</sub>Cl<sub>2</sub>NNaO [M+Na<sup>+</sup>] 360.0892, found 360.0890.

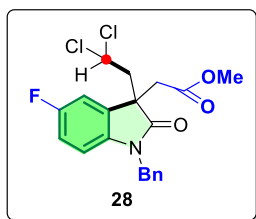

Purification of the crude product by flash column chromatography afforded the cyclization product **28** as pale yellow solid in 59% yield (48 mg).

**<sup>1</sup>H NMR** (400 MHz, CDCl<sub>3</sub>) δ 7.37 – 7.28 (m, 5H), 7.07 (dd, *J* = 7.8, 2.6 Hz, 1H), 6.91 (td, *J* = 8.8, 2.6 Hz, 1H), 6.68 (dd, *J* = 8.6, 4.2 Hz, 1H), 5.51 (dd, *J* = 7.8, 5.2 Hz, 1H), 5.01 (d, *J* = 15.6 Hz, 1H), 4.81 (d, *J* = 15.7 Hz, 1H), 3.51 (s, 3H), 3.03 – 2.90 (m, 4H).

**<sup>13</sup>C NMR** (101 MHz, CDCl<sub>3</sub>) δ 177.2, 169.3, 159.1 (d, *J* = 241.9 Hz), 139.5 (d, *J* = 2.1 Hz), 135.2, 130.1 (d, *J* = 8.0 Hz), 128.8, 127.8, 127.5, 115.3 (d, *J* = 23.2 Hz), 111.8 (d, *J* = 25.0 Hz), 110.3 (d, *J* = 8.1 Hz), 68.6, 51.9, 49.0, 48.9 (d, *J* = 1.8 Hz), 44.6, 41.4.

**HRMS** (ESI) *m/z* calculated for C<sub>20</sub>H<sub>18</sub>Cl<sub>2</sub>FNNaO<sub>3</sub> [M+Na<sup>+</sup>] 432.0540, found 432.0539.



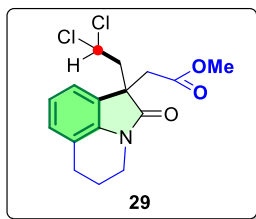

Purification of the crude product by flash column chromatography afforded the cyclization product **29** as pale yellow oil in 67% yield (46 mg).

**<sup>1</sup>H NMR** (400 MHz, CDCl<sub>3</sub>) δ 7.10 – 7.06 (m, 2H), 6.97 – 6.93 (m, 1H), 5.42 (t, *J* = 6.5 Hz, 1H), 3.75 – 3.65 (m, 2H), 3.51 (s, 3H), 2.94 (d, *J* = 6.5 Hz, 2H), 2.91 – 2.81 (m, 2H), 2.77 (t, *J* = 6.1 Hz, 2H), 2.04 – 1.93 (m, 2H).

**<sup>13</sup>C NMR** (101 MHz, CDCl<sub>3</sub>) δ 176.2, 169.7, 140.0, 127.9, 126.6, 122.1, 121.3, 120.7, 69.3, 51.7, 49.6, 48.6, 41.1, 39.1, 24.6, 20.9.

**HRMS** (ESI) *m/z* calculated for C<sub>16</sub>H<sub>17</sub>Cl<sub>2</sub>NNaO<sub>3</sub> [M+Na<sup>+</sup>] 364.0478, found 364.0478.

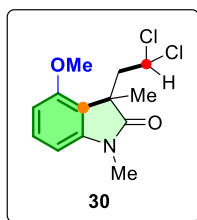

Purification of the crude product by flash column chromatography afforded the cyclization product **30** as pale yellow solid in 56% yield (32 mg).

**<sup>1</sup>H NMR** (400 MHz, CDCl<sub>3</sub>) δ 7.31 – 7.27 (m, 1H), 6.64 (d, *J* = 8.5 Hz, 1H), 6.54 (d, *J* = 7.8 Hz, 1H), 5.33 (dd, *J* = 8.3, 5.3 Hz, 1H), 3.88 (s, 3H), 3.18 (s, 3H), 2.99 – 2.97 (m, 2H), 1.41 (s, 3H).

**<sup>13</sup>C NMR** (101 MHz, CDCl<sub>3</sub>) δ 179.6, 155.8, 144.7, 129.9, 116.3, 105.6, 101.9, 70.6, 55.5, 48.4, 47.5, 26.6, 23.1.

**HRMS** (ESI) *m/z* calculated for C<sub>13</sub>H<sub>15</sub>Cl<sub>2</sub>NNaO<sub>2</sub> [M+Na<sup>+</sup>] 310.0372, found 310.0373.

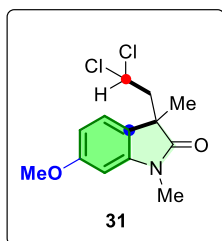

Purification of the crude product by flash column chromatography afforded the cyclization product **31** as colorless oil in 29% yield (17 mg).

**<sup>1</sup>H NMR** (400 MHz, CDCl<sub>3</sub>) δ 7.08 (d, *J* = 8.2 Hz, 1H), 6.59 (dd, *J* = 8.1, 2.3 Hz, 1H), 6.45 (d, *J* = 2.2 Hz, 1H), 5.37 (dd, *J* = 9.4, 4.0 Hz, 1H), 3.84 (s, 3H), 3.18 (s, 3H), 3.00 (dd, *J* = 14.8, 9.4 Hz, 1H), 2.66 (dd, *J* = 14.8, 4.0 Hz, 1H), 1.36 (s, 3H).

**<sup>13</sup>C NMR** (101 MHz, CDCl<sub>3</sub>) δ 179.6, 160.5, 144.7, 123.3, 122.8, 106.5, 96.6, 69.8, 55.5, 50.3, 46.7, 26.5, 25.5.

**HRMS** (ESI) *m/z* calculated for C<sub>13</sub>H<sub>15</sub>Cl<sub>2</sub>NNaO<sub>2</sub> [M+Na<sup>+</sup>] 310.0372, found 310.0374.

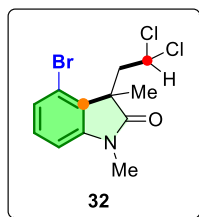

Purification of the crude product by flash column chromatography afforded the cyclization product **32** as white solid in 59% yield (40 mg).

**<sup>1</sup>H NMR** (400 MHz, CDCl<sub>3</sub>) δ 7.22 – 7.17 (m, 2H), 6.82 (dd, *J* = 5.9, 2.9 Hz, 1H), 5.38 (dd, *J* = 10.1, 3.6 Hz, 1H), 3.25 – 3.20 (m, 4H), 2.98 (dd, *J* = 14.8, 10.1 Hz, 1H), 1.50 (s, 3H).

**<sup>13</sup>C NMR** (101 MHz, CDCl<sub>3</sub>) δ 178.6, 145.6, 130.2, 128.9, 126.5, 118.9, 107.6, 70.0, 49.2, 47.6, 26.7, 22.5.

**HRMS** (ESI) *m/z* calculated for C<sub>12</sub>H<sub>12</sub>BrCl<sub>2</sub>NNaO [M+Na<sup>+</sup>] 357.9372, found 357.9370.

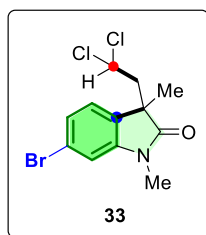

Purification of the crude product by flash column chromatography afforded the cyclization product **33** as colorless oil in 22% yield (15 mg).

**<sup>1</sup>H NMR** (400 MHz, CDCl<sub>3</sub>) δ 7.24 (dd, *J* = 7.8, 1.7 Hz, 1H), 7.06 (d, *J* = 7.8 Hz, 1H), 7.02 (d, *J* = 1.7 Hz, 1H), 5.38 (dd, *J* = 9.0, 4.4 Hz, 1H), 3.19 (s, 3H), 3.02 (dd, *J* = 14.9, 9.0 Hz, 1H), 2.69 (dd, *J* = 14.9, 4.4 Hz, 1H), 1.38 (s, 3H).

**<sup>13</sup>C NMR** (101 MHz, CDCl<sub>3</sub>) δ 178.7, 144.8, 130.0, 125.4, 124.0, 122.2, 112.2, 69.4, 49.9, 47.0, 26.6, 25.4.

**HRMS** (ESI)  $m/z$  calculated for  $C_{12}H_{12}BrCl_2NNaO$   $[M+Na^+]$  357.9372, found 357.9367.

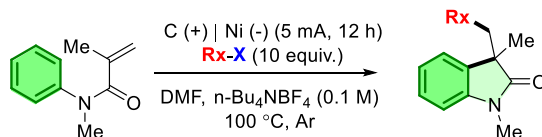

**General procedure 2:** To an oven-dried Schlenk tube equipped with a magnetic stir bar, acrylamide (1 equiv., 0.2 mmol, 35 mg) and n-Bu<sub>4</sub>NBF<sub>4</sub> (0.1 M, 0.4 mmol, 132 mg) were added. The rubber plug equipped with a carbon felt anode (10 mm \* 10 mm) and a foam Ni cathode (10 mm\* mm) was used to keep the Schlenk tube sealed. The tube was evacuated and filled with Ar, repeating three times. halomethanes (10 equiv., 2 mmol) was dissolved in 4 mL DMF and then injected into the tube via syringe. The mixture was stirred for 5 min and put in the oil bath (100 °C) with the electrolysis of 5 mA, 12h. After the reaction, the tube was cooled to room temperature and ethyl acetate (10 mL) and water (10 mL) was added. The aqueous layer was separated and extracted with ethyl acetate (3×10 mL), and the combined organic layers were washed with brine and dried over sodium sulfate. Following concentration in vacuo, the crude residue was subjected to flash column chromatography on silica gel to yield the desired product.

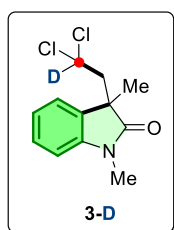

Purification of the crude product by flash column chromatography afforded the cyclization product **3-D** as colorless oil in 83% yield (43 mg).

**<sup>1</sup>H NMR** (400 MHz, CDCl<sub>3</sub>)  $\delta$  7.31 (td,  $J = 7.7, 1.2$  Hz, 1H), 7.20 – 7.18 (m, 1H), 7.11 – 7.07 (m, 1H), 6.87 (d,  $J = 7.8$  Hz, 1H), 3.20 (s, 3H), 3.02 (d,  $J = 14.8$  Hz, 1H), 2.69 (d,  $J = 14.8$  Hz, 1H), 1.39 (s, 3H).

**<sup>13</sup>C NMR** (101 MHz, CDCl<sub>3</sub>)  $\delta$  178.9 143.3, 131.0, 128.6, 122.6, 122.6, 108.6, 69.4 ( $J = 27.3$  Hz), 49.9, 47.1, 26.4, 25.4.

**HRMS** (ESI)  $m/z$  calculated for  $C_{12}H_{12}Cl_2DNNaO$   $[M+Na^+]$  281.0329, found 281.0327.

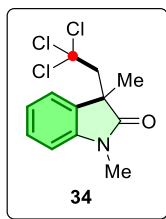

Purification of the crude product by flash column chromatography afforded the cyclization product **34** as pale yellow solid in 17% yield (10 mg).

**<sup>1</sup>H NMR** (400 MHz, CDCl<sub>3</sub>) δ 7.35 (d, *J* = 7.4 Hz, 1H), 7.33 – 7.29 (m, 1H), 7.06 (t, *J* = 7.5 Hz, 1H), 6.88 (d, *J* = 7.8 Hz, 1H), 3.69 (d, *J* = 15.2 Hz, 1H), 3.34 (d, *J* = 15.3 Hz, 1H), 3.23 (s, 3H), 1.39 (s, 3H).

**<sup>13</sup>C NMR** (101 MHz, CDCl<sub>3</sub>) δ 178.6, 143.2, 129.5, 128.5, 125.6, 122.0, 108.4, 96.1, 59.8, 48.0, 26.8, 26.6.

**HRMS** (ESI) *m/z* calculated for C<sub>12</sub>H<sub>12</sub>Cl<sub>3</sub>NNaO [M+Na<sup>+</sup>] 313.9877, found 313.9875.

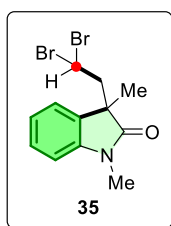

Purification of the crude product by flash column chromatography afforded the cyclization product **35** as colorless oil in 64% yield (44 mg).

**<sup>1</sup>H NMR** (400 MHz, CDCl<sub>3</sub>) δ 7.32 (td, *J* = 7.7, 1.3 Hz, 1H), 7.19 – 7.17 (m, 1H), 7.12 – 7.08 (m, 1H), 6.87 (d, *J* = 7.8 Hz, 1H), 5.30 (dd, *J* = 9.6, 4.3 Hz, 1H), 3.27 (dd, *J* = 15.1, 9.6 Hz, 1H), 3.20 (s, 3H), 2.99 (dd, *J* = 15.2, 4.3 Hz, 1H), 1.37 (s, 3H).

**<sup>13</sup>C NMR** (101 MHz, CDCl<sub>3</sub>) δ 178.8, 143.5, 130.7, 128.6, 122.6, 108.6, 51.5, 48.5, 39.6, 26.5, 25.6.

**HRMS** (ESI) *m/z* calculated for C<sub>12</sub>H<sub>13</sub>Br<sub>2</sub>NNaO [M+Na<sup>+</sup>] 367.9256, found 367.9254.

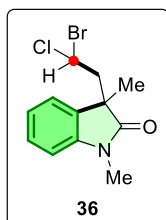

Purification of the crude product by flash column chromatography afforded the cyclization product **36** as colorless oil in 66% yield (40 mg, a mixture of diastereoisomers, d.r. ~ 1.2:1).

**<sup>1</sup>H NMR** (400 MHz, CDCl<sub>3</sub>) δ 7.32 (tdd, *J* = 7.7, 3.8, 1.1 Hz, 1H), 7.20 – 7.18 (m, 1H), 7.12 – 7.08 (m, 1H), 6.87 (d, *J* = 7.8 Hz, 1H), 5.43 – 5.36 (m, 1H), 3.21 – 3.09 (m, 4H), 2.87 – 2.81 (m, 1H), 1.39 (s, 1.3H), 1.38 (s, 1.5H).

**<sup>13</sup>C NMR** (101 MHz, CDCl<sub>3</sub>) δ 179.0, 178.7, 143.5, 143.4, 131.1, 130.7, 128.6, 128.5, 122.7, 122.6, 122.6, 108.6, 108.6, 55.7, 55.6, 51.1, 50.8, 48.0, 47.8, 26.4, 25.6, 25.3.

**HRMS** (ESI) *m/z* calculated for C<sub>12</sub>H<sub>13</sub>BrCINNaO [M+Na<sup>+</sup>] 323.9761, found 323.9762.

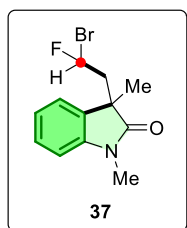

Purification of the crude product by flash column chromatography afforded the cyclization product **37** as colorless oil in 13% yield (8 mg, a mixture of diastereoisomers, d.r. ~ 1.5:1).

**<sup>1</sup>H NMR** (400 MHz, CDCl<sub>3</sub>) δ 7.34 – 7.28 (m, 1H), 7.23 – 7.19 (m, 1H), 7.11 – 7.08 (m, 1H), 6.87 (d, *J* = 7.8 Hz, 1H), 6.28 (dd, *J* = 7.4, 4.6 Hz, 0.2H), 6.25 (dd, *J* = 9.9, 2.0 Hz, 0.3H), 6.16 (dd, *J* = 7.4, 4.6 Hz, 0.2H), 6.12 (dd, *J* = 9.9, 2.0 Hz, 0.3H), 3.23 (s, 1.2H), 3.20 (s, 1.8H), 3.14 – 3.05 (m, 0.66H), 2.92 – 2.70 (m, 0.86H), 2.56 (dd, *J* = 14.9, 2.0 Hz, 0.32H), 2.46 (dd, *J* = 14.9, 2.0 Hz, 0.32H), 1.42 (s, 1.2H), 1.41 (s, 1.8H).

**<sup>13</sup>C NMR** (101 MHz, CDCl<sub>3</sub>) δ 179.0, 178.7, 143.3, 142.9, 131.8, 131.3, 128.6, 128.4, 122.9, 122.8, 122.7, 122.7, 108.5, 108.5, 92.5 (d, *J* = 43.2 Hz), 90.0 (d, *J* = 43.2 Hz), 48.5 (d, *J* = 19.7 Hz), 47.6 (d, *J* = 19.4 Hz), 47.0, 46.9, 46.9, 26.4, 26.3, 24.7, 24.0.

**<sup>19</sup>F NMR** (376 MHz, CDCl<sub>3</sub>) -130.1 (s, 1F), -133.8 (s, 1.5F).

**HRMS** (ESI) *m/z* calculated for C<sub>12</sub>H<sub>13</sub>BrFNNaO [M+Na<sup>+</sup>] 308.0057, found 308.0055.

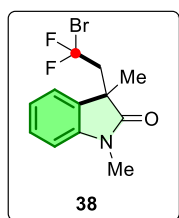

Purification of the crude product by flash column chromatography afforded the cyclization product **38** as colorless oil in 38% yield (23 mg).

**<sup>1</sup>H NMR** (400 MHz, CDCl<sub>3</sub>) δ 7.31 (td, *J* = 7.7, 1.1 Hz, 1H), 7.27 – 7.25 (m, 1H), 7.08 (td, *J* = 7.5, 0.7 Hz, 1H), 6.88 (d, *J* = 7.8 Hz, 1H), 3.34 – 3.22 (m, 4H), 3.10 – 2.98 (m, 1H), 1.38 (s, 3H).

**<sup>13</sup>C NMR** (101 MHz, CDCl<sub>3</sub>) δ 178.3, 142.8, 130.8, 128.4, 123.8 (t, *J* = 1.7 Hz), 122.5, 119.5 (t, *J* = 307.5 Hz), 108.4, 50.9 (t, *J* = 21.0 Hz), 45.9, 26.4, 25.3.

**<sup>19</sup>F NMR** (376 MHz, CDCl<sub>3</sub>) δ ppm –39.9 (d, *J* = 155.0 Hz, 1F), –43.9 (d, *J* = 154.9 Hz, 1F).

**HRMS** (ESI) *m/z* calculated for C<sub>12</sub>H<sub>12</sub>BrF<sub>2</sub>NNaO [M+Na<sup>+</sup>] 325.9963, found 325.9963.

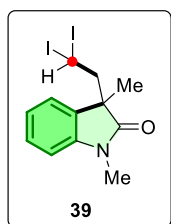

Purification of the crude product by flash column chromatography afforded the cyclization product **39** as colorless cream in 29% yield (26 mg).

**<sup>1</sup>H NMR** (400 MHz, CDCl<sub>3</sub>) δ 7.33 (td, *J* = 7.7, 1.4 Hz, 1H), 7.17 – 7.15 (m, 1H), 7.12 – 7.08 (m, 1H), 6.87 (d, *J* = 7.8 Hz, 1H), 4.68 (dd, *J* = 9.7, 4.9 Hz, 1H), 3.35 (dd, *J* = 15.3, 9.7 Hz, 1H), 3.21 – 3.15 (m, 4H), 1.31 (s, 3H).

**<sup>13</sup>C NMR** (101 MHz, CDCl<sub>3</sub>) δ 178.5, 143.9, 130.3, 128.6, 122.7, 122.7, 108.7, 54.0, 50.8, 26.6, 25.9, –38.6.

**HRMS** (ESI) *m/z* calculated for C<sub>12</sub>H<sub>13</sub>I<sub>2</sub>NNaO [M+Na<sup>+</sup>] 463.8979, found 463.8977.

## 5. Mechanistic studies

### a) Radical scavenging experiments

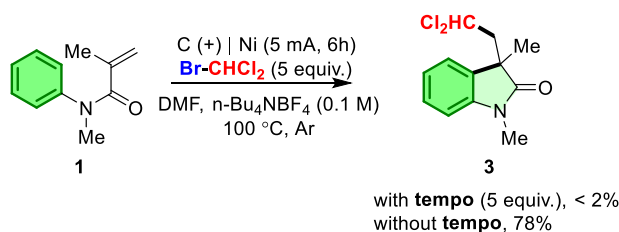

To an oven-dried Schlenk tube equipped with a magnetic stir bar, acrylamide (1 equiv., 0.2 mmol, 35 mg), n-Bu<sub>4</sub>NBF<sub>4</sub> (0.1 M, 0.4 mmol, 132 mg) and radical scavenger (tempo, 5 equiv., 156 mg) were added. The rubber plug equipped with a carbon felt

anode (5 mm \* 5 mm) and a foam Ni cathode (5 mm\* 5 mm) was used to keep the Schlenk tube sealed. The tube was evacuated and filled with Ar, repeating three times. BrCHCl<sub>2</sub> (5 equiv., 2 mmol, 83 μL) was dissolved in 4 mL DMF and then injected into the tube via syringe. The mixture was stirred for 5 min and put in the oil bath (100 °C) with the electrolysis of 5 mA, 6h. After the reaction, the tube was cooled to room temperature and trace **3** was detected by thin layer chromatography.

### b) Detection of generated bromide ion

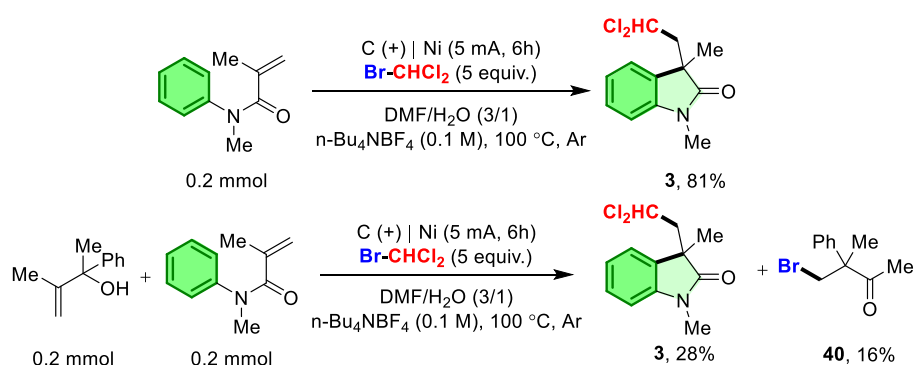

To an oven-dried Schlenk tube equipped with a magnetic stir bar, acrylamide (1 equiv., 0.2 mmol, 35 mg), n-Bu<sub>4</sub>NBF<sub>4</sub> (0.1 M, 0.4 mmol, 132 mg) and allyl alcohol (1 equiv., 0.2 mmol, 33 mg) were added. The rubber plug equipped with a carbon felt anode (5 mm \* 5 mm) and a foam Ni cathode (5 mm\* 5 mm) was used to keep the Schlenk tube sealed. The tube was evacuated and filled with Ar, repeating three times. BrCHCl<sub>2</sub> (5 equiv., 2 mmol, 83 μL) was dissolved in DMF/H<sub>2</sub>O (3/1 mL) and then injected into the tube via syringe. The mixture was stirred for 5 min and put in the oil bath (100 °C) with the electrolysis of 5 mA, 6h. After the reaction, the tube was cooled to room temperature and ethyl acetate (10 mL) and water (10 mL) was added. The aqueous layer was separated and extracted with ethyl acetate (3×10 mL), and the combined organic layers were washed with brine and dried over sodium sulfate. Following concentration in vacuo, the crude residue was subjected to flash column chromatography on silica gel to yield **3** in 28% yield and **40** in 16% yield.

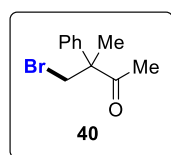

<sup>1</sup>H NMR (400 MHz, CDCl<sub>3</sub>) δ 7.40 – 7.36 (m, 2H), 7.33 – 7.30 (m, 1H), 7.26 – 7.24

(m, 2H), 3.95 (d,  $J = 10.4$  Hz, 1H), 3.71 (d,  $J = 10.5$  Hz, 1H), 2.00 (s, 3H), 1.72 (s, 3H).

The  $^1\text{H}$  NMR spectra is consistent with the literature.

### c) Reaction process analysis

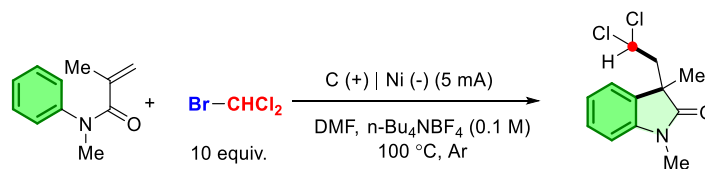

To an oven-dried Schlenk tube equipped with a magnetic stir bar, acrylamide (1 equiv., 0.2 mmol, 35 mg) and  $n\text{-Bu}_4\text{NBF}_4$  (0.1 M, 0.4 mmol, 132 mg) were added. The rubber plug equipped with a carbon felt anode (5 mm \* 5 mm) and a foam Ni cathode (5 mm \* 5 mm) was used to keep the Schlenk tube sealed. The tube was evacuated and filled with Ar, repeating three times.  $\text{BrCHCl}_2$  (10 equiv., 2 mmol, 165  $\mu\text{L}$ ) was dissolved in 4 mL DMF and then injected into the tube via syringe. The mixture was stirred for 5 min and put in the oil bath ( $100^\circ\text{C}$ ) with the electrolysis of 5 mA for different reaction time (1h, 2h, 3h, 6h, 12h). After the reaction, the tube was cooled to room temperature and ethyl acetate (10 mL) and water (10 mL) was added. The aqueous layer was separated and extracted with ethyl acetate ( $3 \times 10$  mL), and the combined organic layers were washed with brine and dried over sodium sulfate. Following concentration in vacuo, the crude residue was subjected to flash column chromatography on silica gel to yield the desired product and the acrylamide was recycled.

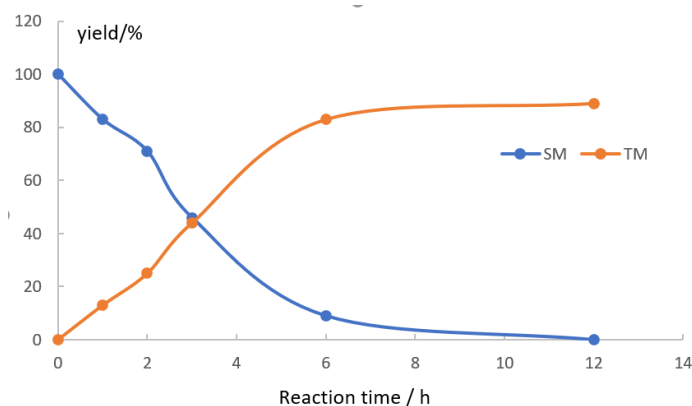

**Fig. S3.** Reaction process analysis.



## 6. Synthetic applications

### (a) Gram-scale synthesis

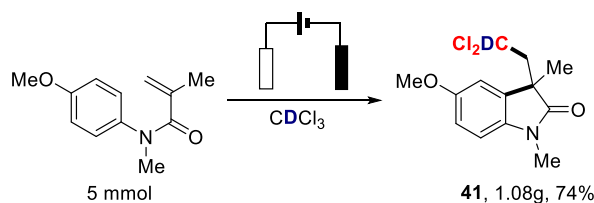

To an oven-dried 100 mL Schlenk tube equipped with a magnetic stir bar, acrylamide (1 equiv., 5 mmol, 1.025 g),  $\text{CDCl}_3$  (10 equiv., 50 mmol, 4.05 mL),  $n\text{-Bu}_4\text{NBF}_4$  (0.1 M, 5 mmol, 1.65 g) and dry DMF (50 mL) were added. The tube was flushed with Ar for 3 min to exclude the air. The rubber plug equipped with a carbon felt anode (25 mm \* 20 mm) and a foam Ni cathode (25 mm \* 20 mm) was used to keep the Schlenk tube sealed. The mixture was stirred for 5 min and put in the oil bath (100 °C) with the electrolysis of 35 mA, 72 h. After the reaction, the tube was cooled to room temperature and ethyl acetate (50 mL) and water (200 mL) was added. The aqueous layer was separated and extracted with ethyl acetate (3×50 mL), and the combined organic layers were washed with brine and dried over sodium sulfate. Following concentration in vacuo, the crude residue was subjected to flash column chromatography on silica gel to yield the desired product **41** as white solid (1.08 g, 74%).

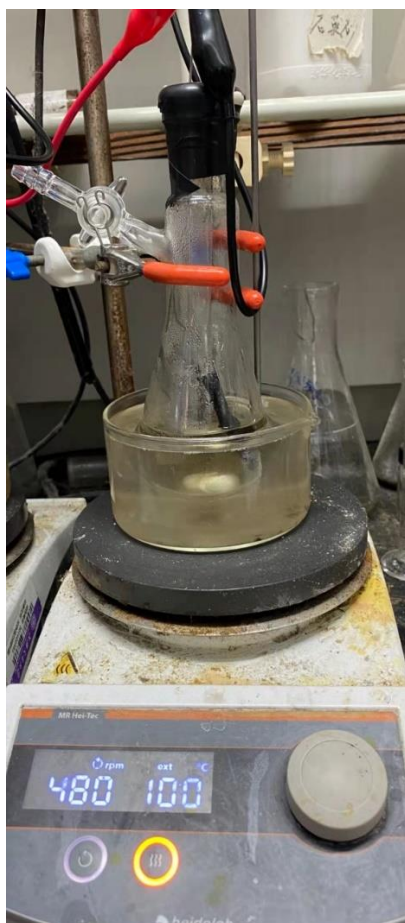

**Fig. S4.** The electrochemical reaction setup for gram-scale synthesis.

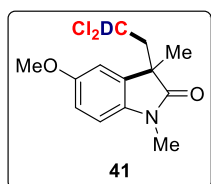

$^1\text{H NMR}$  (400 MHz,  $\text{CDCl}_3$ )  $\delta$  6.83 – 6.75 (m, 3H), 3.79 (s, 3H), 3.16 (s, 3H), 2.99 (d,  $J = 14.8$  Hz, 1H), 2.65 (d,  $J = 14.8$  Hz, 1H), 1.36 (s, 3H).

$^{13}\text{C NMR}$  (101 MHz,  $\text{CDCl}_3$ )  $\delta$  178.5, 156.0, 136.8, 132.4, 112.3, 110.4, 108.8, 69.3 (t,  $J = 27.1$  Hz), 55.7, 49.9, 47.5, 26.4, 25.4.

**HRMS** (ESI)  $m/z$  calculated for  $\text{C}_{13}\text{H}_{14}\text{Cl}_2\text{DNNaO}_2$  [ $\text{M}+\text{Na}^+$ ] 311.0435, found 311.0432.

**(b) Synthesis of deuterated ( $\pm$ ) -Physostigmine**

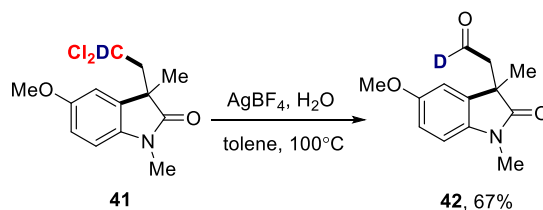

To an oven-dried 10 mL reaction tube equipped with a magnetic stir bar, **41** (1 equiv., 0.2 mmol, 58 mg), AgBF<sub>4</sub> (4 equiv., 0.8 mmol, 160 mg), Celite (100 mg), H<sub>2</sub>O (100 μL) and toluene (1 mL) were added. The tube was flushed with Ar for 1 min to exclude the air. The tube was sealed and put in the oil bath (100 °C) with vigorous stirring. After the reaction, the tube was cooled to room temperature and the reaction mixture was subjected to flash column chromatography on silica gel directly to yield the desired product **42** as white solid (31 mg, 67%).

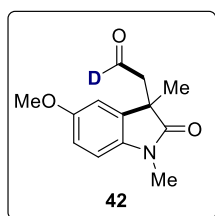

<sup>1</sup>H NMR (400 MHz, CDCl<sub>3</sub>) δ 6.81 – 6.76 (m, 3H), 3.78 (s, 3H), 3.24 (s, 3H), 2.97 (d, *J* = 17.2 Hz, 1H), 2.90 (d, *J* = 17.2 Hz, 1H), 1.41 (s, 3H).

<sup>13</sup>C NMR (101 MHz, CDCl<sub>3</sub>) δ 198.3 (t, *J* = 26.8 Hz), 178.9, 155.8, 136.4, 133.9, 111.9, 110.1, 108.4, 55.5, 50.1 (t, *J* = 3.6 Hz), 45.1, 26.2, 23.7.

HRMS (ESI) *m/z* calculated for C<sub>13</sub>H<sub>14</sub>DNNaO<sub>3</sub> [*M*+Na<sup>+</sup>] 257.1007, found 257.1006.

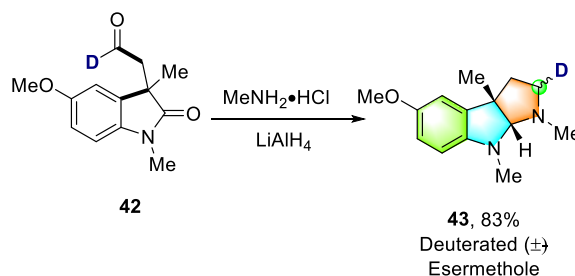

To an oven-dried 100 mL flask equipped with a magnetic stir bar, **42** (1 equiv., 0.8 mmol, 180 mg), MeNH<sub>2</sub> · HCl (10 equiv., 8 mmol, 540 mg), Et<sub>3</sub>N (10 equiv., 8 mmol, 1.115 mL), MgSO<sub>4</sub> (730 mg) and dry THF (45 mL) were added. The tube was flushed with Ar for 3 min to exclude the air. The tube was sealed and reacted for 16 h at room temperature. LiAlH<sub>4</sub> (10 equiv., 8 mmol, 306 mg) was then added and the mixture was refluxed at 80 °C for 1.5 h. After the reaction, the tube was cooled to room temperature

and ethyl acetate (30 mL) and saturated NaHCO<sub>3</sub> aq. solution (30 mL) were added. The aqueous layer was separated and extracted with ethyl acetate (3×20 mL), and the combined organic layers were washed with brine and dried over sodium sulfate. Following concentration in vacuo, the crude residue was subjected to flash column chromatography on silica gel to yield the desired product **43** as colorless oil (155 mg, 83%, a mixture of diastereoisomers, d.r. ~ 1.1:1).

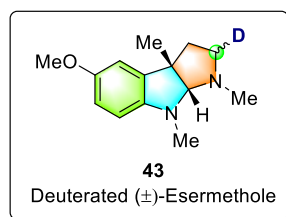

**<sup>1</sup>H NMR** (400 MHz, CDCl<sub>3</sub>) δ 6.66 – 6.63 (m, 2H), 6.35 (d, *J* = 8.1 Hz, 1H), 4.06 (s, 0.52H), 4.05 (s, 0.43H), 3.74 (s, 3H), 2.89 (s, 3H), 2.70 (t, *J* = 5.2 Hz, 0.51H), 2.61 (t, *J* = 7.5 Hz, 0.58H), 2.53 (s, 3H), 1.94 (d, *J* = 7.1 Hz, 2H), 1.43 (s, 3H).

**<sup>13</sup>C NMR** (101 MHz, CDCl<sub>3</sub>; values in brackets were corresponding to the same carbon in diastereoisomers) δ 152.9, 146.5 (146.4), 138.2, 112.1, 109.7, 107.4, 98.3 (98.2), 55.9, 52.8 (td, *J* = 21.4, 3.1 Hz), 52.7, 40.7 (40.6), 38.1 (38.0), 37.9 (37.8), 27.4 (27.3).

**HRMS** (ESI) *m/z* calculated for C<sub>14</sub>H<sub>20</sub>DN<sub>2</sub>O [M+H<sup>+</sup>] 234.1711, found 234.1711.

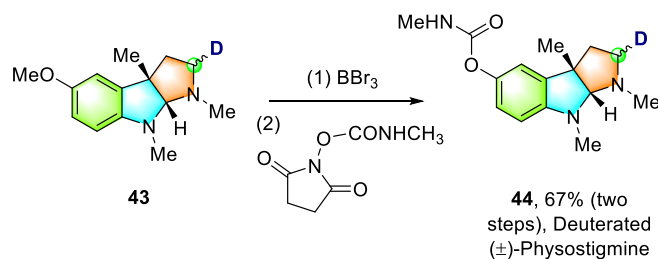

To an oven-dried 50 mL flask equipped with a magnetic stir bar, **43** (1 equiv., 0.5 mmol, 116 mg) was dissolved in dry DCM (10 mL). BBr<sub>3</sub> solution (1 M in DCM, 3 equiv., 1.5 mL) was slowly added at 0 °C and then reacted at rt for 5 h. After the reaction, the tube was cooled to 0 °C and quenched with H<sub>2</sub>O (10 mL). The aqueous layer was separated and extracted with DCM (3×10 mL), and the combined organic layers were washed with brine and dried over sodium sulfate. Following concentration in vacuo, the crude residue was directly subjected to the next step of reaction. The resulting phenol was dissolved in dry THF (10 mL) and was added NaH (60% in mineral oil, 2.2 equiv., 1.1 mmol, 44 mg) slowly at 0 °C. After 10 min, N-succinimidyl-N-

methylcarbamate (1.1 equiv., 0.55 mmol, 95 mg) was added and reacted at room temperature for 2 h. Then the reaction was quenched with water and extracted with ethyl acetate. The organic layers were then combined, washed with brine, dried by Na<sub>2</sub>SO<sub>4</sub>, and concentrated. The residue was purified by using flashcolumn chromatography to give **44** as pale yellow oil (92 mg, 67% for two steps, a mixture of diastereoisomers, d.r. ~ 1.1:1).

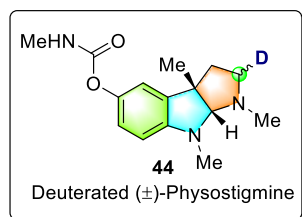

**<sup>1</sup>H NMR** (400 MHz, CDCl<sub>3</sub>) δ 6.79 (dd, *J* = 8.4, 2.2 Hz, 1H), 6.75 (d, *J* = 2.2 Hz, 1H), 6.33 (d, *J* = 8.4 Hz, 1H), 4.97 (d, *J* = 3.4 Hz, 1H), 4.16 (s, 0.50H), 4.15 (s, 0.49H), 2.91 (s, 3H), 2.86 (s, 1.29H), 2.85 (s, 1.50H), 2.73 (t, *J* = 4.9 Hz, 0.65H), 2.61 (t, *J* = 7.6 Hz, 0.63H), 2.53 (s, 3H), 1.95 (d, *J* = 7.2 Hz, 2H), 1.42 (s, 3H).

**<sup>13</sup>C NMR** (101 MHz, CDCl<sub>3</sub>; values in brackets were corresponding to the same carbon in diastereoisomers) δ 156.1, 149.4 (149.3), 143.2, 137.3, 120.5, 116.1, 106.6, 97.8 (97.7), 52.7 (t, *J* = 20.5 Hz), 52.6, 40.5 (40.4), 38.0 (37.9), 37.1 (37.0), 27.7, 27.2 (27.1).

**HRMS** (ESI) *m/z* calculated for C<sub>15</sub>H<sub>21</sub>DN<sub>3</sub>O<sub>2</sub> [M+H<sup>+</sup>] 277.1769, found 277.1767.

### (c) Synthesis of furoindoline

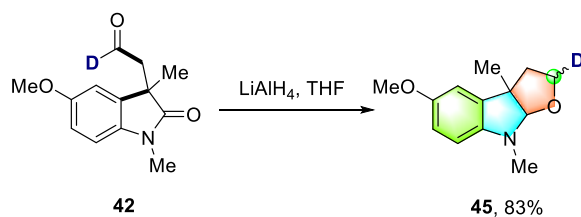

To an oven-dried 10 mL reaction tube equipped with a magnetic stir bar, **42** (1 equiv., 0.3 mmol, 70 mg) was dissolved in dry THF (2 mL). LiAlH<sub>4</sub> solution (2.5 M in THF, 4 equiv., 0.48 mL) was slowly added at 0 °C with the atmosphere of Ar. After the reaction for 5 min, ethyl acetate and H<sub>2</sub>O were added to quench the reaction. The aqueous layer was separated and extracted with ethyl acetate (3×10 mL), and the combined organic layers were washed with brine and dried over sodium sulfate. Following concentration in vacuo, the crude residue was purified by using flashcolumn chromatography to give **45** as colorless oil (55 mg, 83%, a mixture of diastereoisomers,

d.r. ~ 1.5:1).

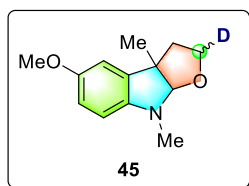

**<sup>1</sup>H NMR** (400 MHz, CDCl<sub>3</sub>) δ 6.69 (d, *J* = 2.2 Hz, 1H), 6.66 (d, *J* = 8.4, 2.3 Hz, 1H), 6.29 (d, *J* = 8.3 Hz, 1H), 5.03 (s, 1H), 3.93 (d, *J* = 7.1 Hz, 0.61H), 3.75 (s, 3H), 3.46 (dd, *J* = 10.9, 5.3 Hz, 0.43H), 2.88 (s, 3H), 2.14 – 2.01 (m, 2H), 1.45 (s, 3H).

**<sup>13</sup>C NMR** (101 MHz, CDCl<sub>3</sub>) δ 152.7, 144.9, 136.0, 112.1, 110.4, 105.6, 105.2, 67.0 (t, *J* = 22.1 Hz), 56.0, 52.4, 41.3, 31.6, 24.4.

**HRMS** (ESI) *m/z* calculated for C<sub>13</sub>H<sub>17</sub>DNO<sub>2</sub> [M+H<sup>+</sup>] 221.1395, found 221.1392.

#### (d) Synthesis of deuterated (±)-Lansai B

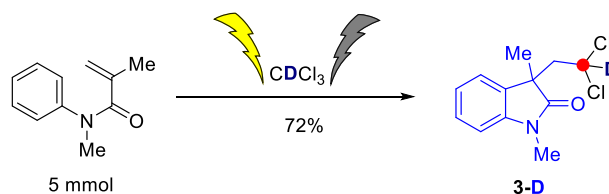

To an oven-dried 100 mL Schlenk tube equipped with a magnetic stir bar, acrylamide (1 equiv., 5 mmol, 857 mg), CDCl<sub>3</sub> (10 equiv., 50 mmol, 4.05 mL), n-Bu<sub>4</sub>NBF<sub>4</sub> (0.1 M, 5 mmol, 1.65 g) and dry DMF (50 mL) were added. The tube was flushed with Ar for 3 min to exclude the air. The rubber plug equipped with a carbon felt anode (25 mm \* 20 mm) and a foam Ni cathode (25 mm \* 20 mm) was used to keep the Schlenk tube sealed. The mixture was stirred for 5 min and put in the oil bath (100 °C) with the electrolysis of 35 mA, 72 h. After the reaction, the tube was cooled to room temperature and ethyl acetate (50 mL) and water (200 mL) was added. The aqueous layer was separated and extracted with ethyl acetate (3×50 mL), and the combined organic layers were washed with brine and dried over sodium sulfate. Following concentration in vacuo, the crude residue was subjected to flash column chromatography on silica gel to yield the desired product **3-D**. Six parallel experiments (5 mmol×6) provided **3-D** in 72% yield (5.6g, 21.6 mmol).

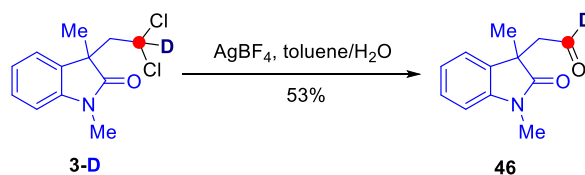

To an oven-dried 25 mL reaction tube equipped with a magnetic stir bar, **3-D** (1 equiv., 1 mmol, 259 mg), AgBF<sub>4</sub> (5 equiv., 5 mmol, 1 g), Celite (500 mg), H<sub>2</sub>O (500 μL) and toluene (5 mL) were added. The tube was flushed with Ar for 3 min to exclude the air. The tube was sealed and put in the oil bath (100 °C) with vigorous stirring for 2 h. After the reaction, the tube was cooled to room temperature and the reaction mixture was subjected to flash column chromatography on silica gel directly to yield the desired product **46** as colorless oil (109 mg, 53%).

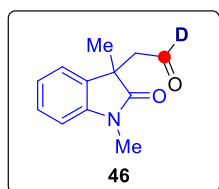

<sup>1</sup>H NMR (400 MHz, CDCl<sub>3</sub>) δ 7.29 – 7.25 (m, 1H), 7.18 (dd, *J* = 7.3, 0.7 Hz, 1H), 7.04 (td, *J* = 7.6, 0.8 Hz, 1H), 6.88 (d, *J* = 7.8 Hz, 1H), 3.25 (s, 3H), 2.96 (d, *J* = 1.7 Hz, 2H), 1.41 (s, 3H).

<sup>13</sup>C NMR (101 MHz, CDCl<sub>3</sub>) δ 198.4 (t, *J* = 26.9 Hz), 179.3, 143.0, 132.6, 128.1, 122.5, 122.2, 108.2, 50.2 (t, *J* = 3.7 Hz), 44.7, 26.2, 23.8.

HRMS (ESI) *m/z* calculated for C<sub>12</sub>H<sub>12</sub>DNNaO<sub>2</sub> [M+Na<sup>+</sup>] 227.0901, found 227.0903.

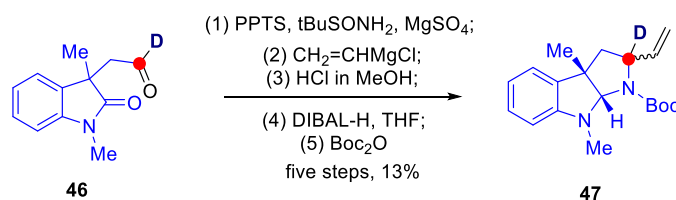

To an oven-dried 50 mL reaction tube equipped with a magnetic stir bar, **46** (1 equiv., 7.5 mmol, 1.53 g), PPTS (5mol%, 0.38 mmol, 96 mg), MgSO<sub>4</sub> (5 equiv., 37.5 mmol, 4.52 g), <sup>t</sup>BuSONH<sub>2</sub> (2 equiv., 15 mmol, 1.82 g) and 20 mL dry DCM were added. The tube was sealed and reacted at room temperature overnight. After the reaction, the mixture was vacuum filtrated to remove salts firstly, and then filtrated through a short silica gel column quickly to remove PPTS and <sup>t</sup>BuSONH<sub>2</sub>. The filtrate was concentrated, dried and used for the next step of reaction without further purification. The resulting

imine was dissolved in dry THF (15 mL) and cooled to  $-65^{\circ}\text{C}$ . Vinylmagnesium chloride (1 M in THF, 2 equiv., 15 mL) was added slowly to the reaction and the reaction proceeded at  $-65^{\circ}\text{C}$  for 2 h. After the reaction, saturated aq.  $\text{NH}_4\text{Cl}$  solution was added to quench the reaction and ethyl acetate was added for extraction. The aqueous layer was separated and extracted with ethyl acetate ( $3\times 20$  mL), and the combined organic layers were washed with brine and dried over sodium sulfate. Following concentration in vacuo, the crude residue was subjected to the further transformation. The resulting sulfinamide was dissolved in MeOH (20 mL) and then added aq. HCl (4 M, 2 equiv., 3.8 mL). The reaction proceeded at room temperature and monitored by TLC. After the reaction, the mixture was concentrated to remove solvent and then alkalized with aq.  $\text{NaHCO}_3$  solution followed by extraction with DCM. The combined organic layer was washed with 1N HCl aqueous solution until there was not amine in organic layer through TLC monitoring. Then aqueous layer was alkalized again with saturated aq.  $\text{NaHCO}_3$  solution and extracted with DCM for three times. The combined organic phase was washed with brine, dried by anhydrous  $\text{Na}_2\text{SO}_4$  and concentrated for the next step of reaction. The obtained amine was dissolved in dry THF (20 mL) and cooled to  $0^{\circ}\text{C}$ . DIBAL-H (1 M in hexane, 3 equiv., 22.5 mL) was added to the reaction and reacted at  $0^{\circ}\text{C}$  for 1h, then at room temperature for 2h and at  $80^{\circ}\text{C}$  for 15 h. After cooling to room temperature, a saturated aqueous solution of potassium sodium tartrate was added and ethyl acetate was used for extraction. The aqueous layer was separated and extracted with ethyl acetate ( $3\times 20$  mL), and the combined organic layers were washed with brine and dried over sodium sulfate. Following concentration in vacuo, the crude residue was subjected to the further transformation. The resulting amine was dissolved in dry THF (10 mL) and  $\text{Boc}_2\text{O}$  (2 equiv., 3.5 mL) was added. The reaction proceeded at room temperature overnight and was then concentrated. The crude residue was subjected to flash column chromatography on silica gel to yield the **47** as colorless oil (307 mg, 13% for five steps, a mixture of diastereomers, d.r.  $\sim 4:1$ ).



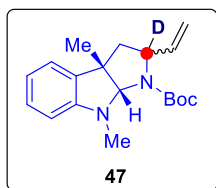

**$^1\text{H}$  NMR** (400 MHz,  $\text{CDCl}_3$ ; compound exists as a mixture of diastereomers, the major is denoted by \*, minor denoted by  $^{\S}$ )  $\delta$  7.13 – 7.09 (m,  $1\text{H}^{*\S}$ ), 6.70 – 6.98 (m,  $1\text{H}^{*\S}$ ), 6.69 (t,  $J = 7.2$  Hz,  $0.87\text{H}^*$ ), 6.66 – 6.64 (m,  $0.15\text{H}^{\S}$ ), 6.43 (d,  $J = 7.8$  Hz,  $0.82\text{H}^*$ ), 6.38 (d,  $J = 7.8$  Hz,  $0.18\text{H}^{\S}$ ), 5.88 (dd,  $J = 15.8, 10.5$  Hz,  $0.78\text{H}^*$ ), 5.48 (dd,  $J = 17.0, 10.0$  Hz,  $0.26\text{H}^{\S}$ ), 5.23 (s,  $1\text{H}^{*\S}$ ), 5.07 – 5.01 (m,  $1.91\text{H}^{*\S}$ ), 4.84 (d,  $J = 10.0$  Hz,  $0.20\text{H}^{\S}$ ), 3.01 (s,  $2.55\text{H}^*$ ), 2.95 (s,  $0.62\text{H}^{\S}$ ), 2.30 (d,  $J = 12.7$  Hz,  $0.90\text{H}^*$ ), 2.18 (d,  $J = 12.8$  Hz,  $0.22\text{H}^{\S}$ ), 2.01 (d,  $J = 12.8$  Hz,  $0.25\text{H}^{\S}$ ), 1.85 (d,  $J = 12.8$  Hz,  $0.92\text{H}^*$ ), 1.53 (s,  $8.84\text{H}^{*\S}$ ), 1.45 (s,  $2.72\text{H}^{*\S}$ ), 1.39 (s,  $0.55\text{H}^{*\S}$ ).

**$^{13}\text{C}$  NMR** (101 MHz,  $\text{CDCl}_3$ ; compound exists as a mixture of diastereomers, the major is denoted by \*, minor denoted by  $^{\S}$ )  $\delta$  155.2 $^{\S}$ , 150.0\*, 149.6 $^{\S}$ , 146.7\*, 140.8\*, 139.3 $^{\S}$ , 135.0\*, 134.9 $^{\S}$ , 128.1\*, 127.8 $^{\S}$ , 121.6 $^{\S}$ , 121.4\*, 117.7\*, 117.3 $^{\S}$ , 114.3 $^{\S}$ , 113.4\*, 106.7\*, 106.1 $^{\S}$ , 90.7\*, 90.3 $^{\S}$ , 85.0\*, 80.0 $^{\S}$ , 60.7\* (t,  $J = 22.0$  Hz), 50.0\*, 46.3\*, 45.1 $^{\S}$ , 35.2\*, 32.7 $^{\S}$ , 28.2 $^{\S}$ , 27.3\*, 24.5\*, 24.1 $^{\S}$ .

**HRMS** (ESI)  $m/z$  calculated for  $\text{C}_{19}\text{H}_{26}\text{DN}_2\text{O}_2$  [ $\text{M}+\text{H}^+$ ] 316.2130, found 316.2128.

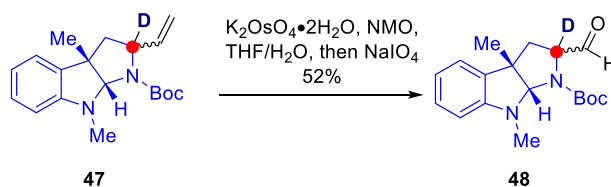

To an oven-dried 50 mL reaction tube equipped with a magnetic stir bar, **47** (1 equiv., 1.9 mmol, 595 mg),  $\text{K}_2\text{OsO}_4 \cdot 2\text{H}_2\text{O}$  (0.2 equiv., 0.38 mmol, 140 mg), NMO (2 equiv., 3.8 mmol, 445 mg) and THF/ $\text{H}_2\text{O}$  (15/5 mL) were added. The tube was sealed and reacted at room temperature with stirring for 15 h. Then  $\text{NaIO}_4$  (2 equiv., 3.8 mmol, 813 mg) was added and reacted for 2 h.  $\text{NaIO}_4$  (2 equiv., 3.8 mmol, 813 mg) was added and reacted for 2 h again. After the reaction, a saturated aqueous solution of  $\text{Na}_2\text{S}_2\text{O}_3$  (10 mL) was introduced. The mixture was then extracted with ethyl acetate ( $3 \times 20$  mL), and the combined organic phases were dried over anhydrous sodium sulfate. The filtrate was concentrated, and the residue was chromatographed on silica gel column to yield

**48** as colorless oil (312 mg, 52%, a mixture of diastereomers, d.r. ~ 5:1, both diastereomers exist as a ~ 2:1 mixture of rotamers).

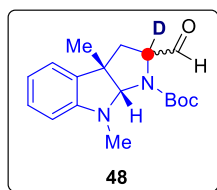

$^1\text{H NMR}$  (400 MHz,  $\text{CDCl}_3$ ; compound exists as a mixture of diastereomers, the major is denoted by \*, minor denoted by  $^{\S}$ )  $\delta$  9.54 (s, 0.26H\*), 9.51 (s, 0.50H\*), 9.22 (s, 0.14H $^{\S}$ ), 7.16 – 7.10 (m, 1H\* $^{\S}$ ), 7.01 – 6.94 (m, 1H\* $^{\S}$ ), 6.73 – 6.67 (m, 1H\* $^{\S}$ ), 6.46 – 6.43 (m, 1H\* $^{\S}$ ), 5.30 (s, 0.51H\*), 5.27 (s, 0.11H $^{\S}$ ), 5.14 (s, 0.06H $^{\S}$ ), 5.11 (s, 0.27H\*), 3.05 (s, 1.51H\*), 3.02 (s, 0.12H $^{\S}$ ), 3.01 (s, 0.29H $^{\S}$ ), 2.98 (s, 0.89H\*), 2.36 (d,  $J = 13.2$  Hz, 0.58H\*), 2.31 – 2.25 (m, 0.44H\* $^{\S}$ ), 2.18 (d,  $J = 12.8$  Hz, 0.19H $^{\S}$ ), 2.03 (d,  $J = 13.5$  Hz, 0.59H\*), 1.98 (d,  $J = 13.3$  Hz, 0.31H\*), 1.55 (s, 3H\* $^{\S}$ ), 1.45 (s, 5.45H\* $^{\S}$ ), 1.42 (s, 1.59H\* $^{\S}$ ), 1.40 (s, 1.81H\* $^{\S}$ ).

$^{13}\text{C NMR}$  (101 MHz,  $\text{CDCl}_3$ ; compound exists as a mixture of diastereomers, the major is denoted by \*, minor denoted by  $^{\S}$ )  $\delta$  200.8 $^{\S}$ , 199.3\*, 198.9\*, 155.0 $^{\S}$ , 154.4\*, 154.2\*, 149.8\*, 149.7\*, 133.7\*, 133.6\*, 133.2 $^{\S}$ , 128.8\*, 128.6\*, 128.4 $^{\S}$ , 122.2 $^{\S}$ , 122.0 $^{\S}$ , 121.7\*, 121.6\*, 118.2\*, 118.1\*, 107.1\*, 107.0\*, 90.8\*, 90.5 $^{\S}$ , 90.3\*, 90.0 $^{\S}$ , 81.7\*, 81.6\*, 81.4 $^{\S}$ , 81.3 $^{\S}$ , 65.4\* (t,  $J = 23.0$  Hz), 65.2\* (t,  $J = 23.0$  Hz), 52.1\*, 51.0 $^{\S}$ , 50.6\*, 41.0\*, 40.7 $^{\S}$ , 40.1\*, 35.1\*, 34.7\*, 33.5 $^{\S}$ , 29.7 $^{\S}$ , 28.3\*, 28.2 $^{\S}$ , 28.1\*, 24.4\*, 24.1\*, 23.0 $^{\S}$ .

**HRMS** (ESI)  $m/z$  calculated for  $\text{C}_{18}\text{H}_{23}\text{DN}_2\text{NaO}_3$  [ $\text{M}+\text{Na}^+$ ] 340.1742, found 340.1741.

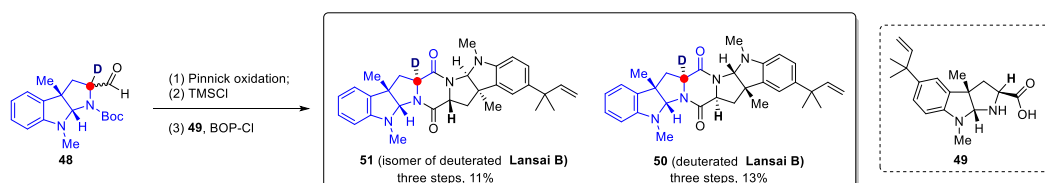

To an oven-dried flask equipped with a magnetic stir bar, **48** (1 equiv., 0.41 mmol, 130 mg) was dissolved in THF/ $\text{H}_2\text{O}$ / $t\text{BuOH}$  (5/5/1.3 mL). 2-Methyl-2-butene (2.5 mL),  $\text{NaClO}_2$  (2 equiv., 0.82 mmol, 80wt%, 93 mg),  $\text{KH}_2\text{PO}_4$  (5 equiv., 2.05 mmol, 279 mg) were added and the reaction proceeded with stirring at room temperature for 3 h. After the reaction, a saturated aqueous solution of  $\text{NH}_4\text{Cl}$  (10 mL) was introduced. The mixture was then extracted with ethyl acetate ( $3 \times 10$  mL), and the combined organic

phases were dried over anhydrous sodium sulfate. The filtrate was concentrated, and the residue was subjected to the next step of the reaction without further purification. The resulting crude acid was dissolved in dry MeCN (5 mL) and TMSI (2 equiv., 0.82 mmol, 117  $\mu$ L) was added at 0  $^{\circ}$ C. The reaction proceeded at 0  $^{\circ}$ C for 1 h and then TMSI (2 equiv., 0.82 mmol, 117  $\mu$ L) was added and reacted for one more hour. After the reaction, a saturated aqueous solution of Na<sub>2</sub>S<sub>2</sub>O<sub>3</sub> (2 mL) and H<sub>2</sub>O (10 mL) was introduced. The mixture was then extracted with ethyl acetate (3  $\times$  10 mL) and it is ensured that there was product in aqueous phase instead of organic phase. Organic phase was discarded and 1 M HCl aq. solution was added slowly to adjust the pH of aqueous phase to  $\sim$  6. Then the aqueous phase was concentrated and dried on the rotary evaporator to remove moisture. The resulting mixture was then dissolved in DCM and turbid liquid was observed. The mixture was vacuum filtrated through filter paper and the filtrate was collected, concentrated and dried for the further transformation. The obtained amino acid and **49** (**49** was prepared according to the reference<sup>[7]</sup>, 0.21 mmol, 63 mg) were dissolved in dry DCM (6 mL), followed by the addition of DIPEA (0.97 mmol, 167  $\mu$ L) and BOP-Cl (0.84 mmol, 214 mg) at 0  $^{\circ}$ C. The reaction was then conducted at ambient temperature for 13 h before it was quenched with a saturated aqueous solution of Na<sub>2</sub>CO<sub>3</sub> (5 mL). The resulting mixture was extracted with ethyl acetate (3  $\times$  5 mL). The organic phases were combined, dried over anhydrous sodium sulfate, and concentrated. The residue was purified by silica gel column chromatography (two times for silica gel column chromatography, eluent: PE/EA = 20:1; PE/acetone = 20:1) to afford **50** (target molecule, deuterated Lansai B, 13 mg, 13%) as pale yellow solid and **51** (isomers of deuterated Lansai B, 11 mg, 11%) as pale yellow solid.

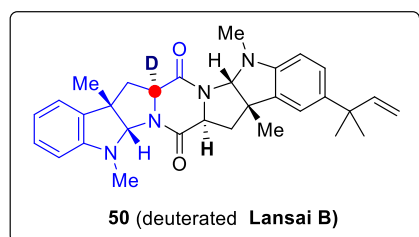

<sup>1</sup>H NMR (400 MHz, CDCl<sub>3</sub>)  $\delta$  7.11 – 7.06 (m, 2H), 7.04 (d,  $J$  = 7.0 Hz, 1H), 7.01 (d,  $J$  = 1.8 Hz, 1H), 6.70 (t,  $J$  = 7.4 Hz, 1H), 6.34 (d,  $J$  = 7.8 Hz, 1H), 6.28 (d,  $J$  = 8.2 Hz,

1H), 5.97 (dd,  $J = 17.4, 10.6$  Hz, 1H), 5.44 (s, 1H), 5.42 (s, 1H), 5.02 (dd,  $J = 11.9, 1.3$  Hz, 1H), 4.98 (dd,  $J = 5.1, 1.3$  Hz, 1H), 4.17 (dd,  $J = 11.2, 6.1$  Hz, 1H), 2.98 (s, 3H), 2.95 (s, 3H), 2.73 – 2.68 (m, 2H), 2.19 – 2.13 (m, 2H), 1.47 (s, 3H), 1.46 (s, 3H), 1.34 (s, 6H).

**$^{13}\text{C}$  NMR** (101 MHz,  $\text{CDCl}_3$ )  $\delta$  165.8, 165.5, 150.1, 148.6, 148.2, 138.7, 132.9, 132.8, 128.7, 126.3, 122.3, 120.2, 118.1, 110.1, 105.8, 105.4, 86.9, 86.5, 60.1, 50.5, 50.3, 42.7, 42.6, 40.7, 33.1, 32.9, 28.5, 25.5, 25.4.

**$^{13}\text{C}$  NMR** (176 MHz,  $\text{CDCl}_3$ )  $\delta$  165.8, 165.7, 149.9, 148.4, 147.5, 139.6, 133.2, 133.0, 128.8, 126.5, 122.4, 120.3, 118.3, 110.3, 106.3, 106.1, 87.1, 86.7, 60.2, 59.8 (t,  $J = 21.9$  Hz), 50.5, 50.3, 42.7, 42.6, 40.7, 33.8, 33.1, 28.5, 25.6, 25.5.

**HRMS** (ESI)  $m/z$  calculated for  $\text{C}_{31}\text{H}_{35}\text{DN}_4\text{NaO}_2$  [ $\text{M}+\text{Na}^+$ ] 520.2793, found 520.2793.

| Tuntiwachwuttikul et al. Report, <sup>1</sup><br>Natural (-)-lansai B<br><sup>1</sup> H NMR, 300 MHz, CDCl <sub>3</sub> | Reisman et al. Report <sup>2</sup><br>Synthetic (-)-lansai B<br><sup>1</sup> H NMR, 500 MHz, CDCl <sub>3</sub> | This Work,<br>Synthetic Deuterated<br>(±)-lansai B<br><sup>1</sup> H NMR, 400 MHz, CDCl <sub>3</sub> |
|-------------------------------------------------------------------------------------------------------------------------|----------------------------------------------------------------------------------------------------------------|------------------------------------------------------------------------------------------------------|
| δ 7.11 (dt, <i>J</i> = 7.8, 1.5 Hz, 1H)                                                                                 | δ 7.13 – 7.05 (m, 1H)                                                                                          | δ 7.11 – 7.06 (m, 2H)                                                                                |
| 7.08 (dd, <i>J</i> = 8.1, 1.5 Hz, 1H)                                                                                   | 7.07 (dd, <i>J</i> = 8.1, 1.8 Hz, 1H)                                                                          |                                                                                                      |
| 7.06 (dd, <i>J</i> = 7.8, 1.5 Hz, 1H)                                                                                   | 7.04 (dd, <i>J</i> = 7.3, 1.2 Hz, 1H)                                                                          | 7.04 (d, <i>J</i> = 7.0 Hz, 1H)                                                                      |
| 7.02 (d, <i>J</i> = 1.5 Hz, 1H)                                                                                         | 7.01 (d, <i>J</i> = 1.9 Hz, 1H)                                                                                | 7.01 (d, <i>J</i> = 1.8 Hz, 1H)                                                                      |
| 6.71 (dt, <i>J</i> = 7.8, 1.5 Hz, 1H)                                                                                   | 6.70 (td, <i>J</i> = 7.4, 0.9 Hz, 1H)                                                                          | 6.70 (t, <i>J</i> = 7.4 Hz, 1H)                                                                      |
| 6.36 (dd, <i>J</i> = 7.8, 1.5 Hz, 1H)                                                                                   | 6.34 (d, <i>J</i> = 7.8 Hz, 1H)                                                                                | 6.34 (d, <i>J</i> = 7.8 Hz, 1H)                                                                      |
| 6.29 (d, <i>J</i> = 8.1 Hz, 1H)                                                                                         | 6.28 (d, <i>J</i> = 8.1 Hz, 1H)                                                                                | 6.28 (d, <i>J</i> = 8.2 Hz, 1H)                                                                      |
| 5.99 (dd, <i>J</i> = 17.5, 10.6 Hz, 1H)                                                                                 | 5.97 (dd, <i>J</i> = 17.4, 10.6 Hz, 1H)                                                                        | 5.97 (dd, <i>J</i> = 17.4, 10.6 Hz, 1H)                                                              |
| 5.46 (s, 1H)                                                                                                            | 5.44 (s, 1H)                                                                                                   | 5.44 (s, 1H)                                                                                         |
| 5.44 (s, 1H)                                                                                                            | 5.42 (s, 1H)                                                                                                   | 5.42 (s, 1H)                                                                                         |
| 5.03 (d, <i>J</i> = 10.6 Hz, 1H)                                                                                        | 5.01 (dd, <i>J</i> = 14.0, 1.4 Hz, 1H)                                                                         | 5.02 (dd, <i>J</i> = 11.9, 1.3 Hz, 1H)                                                               |
| 5.01 (d, <i>J</i> = 17.5 Hz, 1H)                                                                                        | 4.99 (dd, <i>J</i> = 7.2, 1.4 Hz, 1H)                                                                          | 4.98 (dd, <i>J</i> = 5.1, 1.3 Hz, 1H)                                                                |
| 4.16 (m, 1H)                                                                                                            | 4.15 (app dddd, <i>J</i> = 13.5, 11.1, 6.1, 2.1 Hz, 2H)                                                        | 4.17 (dd, <i>J</i> = 11.2, 6.1 Hz, 1H)                                                               |
| 4.16 (m, 1H)                                                                                                            | –                                                                                                              | –                                                                                                    |
| 2.99 (s, 3H)                                                                                                            | 2.97 (s, 3H)                                                                                                   | 2.98 (s, 3H)                                                                                         |
| 2.97 (s, 3H)                                                                                                            | 2.95 (s, 3H)                                                                                                   | 2.95 (s, 3H)                                                                                         |
| 2.72 (dd, <i>J</i> = 12.3, 5.9 Hz, 1H)                                                                                  | 2.71 (dd, <i>J</i> = 12.7, 3.0 Hz, 1H)                                                                         | 2.73 – 2.68 (m, 2H)                                                                                  |
| 2.72 (dd, <i>J</i> = 12.3, 5.9 Hz, 1H)                                                                                  | 2.69 (dd, <i>J</i> = 12.7, 3.0 Hz, 1H)                                                                         |                                                                                                      |
| 2.18 (dd, <i>J</i> = 12.3, 11.3 Hz, 1H)                                                                                 | 2.18 (dd, <i>J</i> = 12.6, 6.3 Hz, 1H)                                                                         | 2.19 – 2.13 (m, 2H)                                                                                  |
| 2.17 (dd, <i>J</i> = 12.3, 11.3 Hz, 1H)                                                                                 | 2.15 (dd, <i>J</i> = 12.7, 6.4 Hz, 1H)                                                                         |                                                                                                      |
| 1.49 (s, 3H)                                                                                                            | 1.47 (s, 3H)                                                                                                   | 1.47 (s, 3H)                                                                                         |
| 1.48 (s, 3H)                                                                                                            | 1.46 (s, 3H)                                                                                                   | 1.46 (s, 3H)                                                                                         |
| 1.36 (s, 6H)                                                                                                            | 1.34 (s, 6H)                                                                                                   | 1.34 (s, 6H)                                                                                         |

| Tuntiwachwuttikul et al. Report, <sup>1</sup><br>Natural (–)-lansai B<br><sup>13</sup> C NMR, 75 MHz,<br>CDCl <sub>3</sub> | Reisman et al. Report <sup>2</sup><br>Synthetic (–)-lansai B<br><sup>13</sup> C NMR, 126 MHz,<br>CDCl <sub>3</sub> | This Work,<br>Synthetic<br>Deuterated<br>(±)-lansai B<br><sup>13</sup> C NMR, 101<br>MHz, CDCl <sub>3</sub> | Chemical<br>Shift<br>Difference,<br>Δδ |
|----------------------------------------------------------------------------------------------------------------------------|--------------------------------------------------------------------------------------------------------------------|-------------------------------------------------------------------------------------------------------------|----------------------------------------|
| δ 165.8                                                                                                                    | δ 165.7                                                                                                            | 165.8                                                                                                       | 0.1                                    |
| 165.6                                                                                                                      | 165.5                                                                                                              | 165.5                                                                                                       | 0                                      |
| 150.1                                                                                                                      | 150.1                                                                                                              | 150.1                                                                                                       | 0                                      |
| 148.6                                                                                                                      | 148.6                                                                                                              | 148.6                                                                                                       | 0                                      |
| 148.3                                                                                                                      | 148.2                                                                                                              | 148.2                                                                                                       | 0                                      |
| 138.7                                                                                                                      | 138.7                                                                                                              | 138.7                                                                                                       | 0                                      |
| 132.9                                                                                                                      | 132.9                                                                                                              | 132.9                                                                                                       | 0                                      |
| 132.8                                                                                                                      | 132.8                                                                                                              | 132.8                                                                                                       | 0                                      |
| 128.8                                                                                                                      | 128.7                                                                                                              | 128.7                                                                                                       | 0                                      |
| 126.3                                                                                                                      | 126.3                                                                                                              | 126.3                                                                                                       | 0                                      |
| 122.3                                                                                                                      | 122.3                                                                                                              | 122.3                                                                                                       | 0                                      |
| 120.2                                                                                                                      | 120.2                                                                                                              | 120.2                                                                                                       | 0                                      |
| 118.1                                                                                                                      | 118.1                                                                                                              | 118.1                                                                                                       | 0                                      |
| 110.2                                                                                                                      | 110.1                                                                                                              | 110.1                                                                                                       | 0                                      |
| 105.8                                                                                                                      | 105.8                                                                                                              | 105.8                                                                                                       | 0                                      |
| 105.4                                                                                                                      | 105.4                                                                                                              | 105.4                                                                                                       | 0                                      |
| 86.9                                                                                                                       | 86.9                                                                                                               | 86.9                                                                                                        | 0                                      |
| 86.6                                                                                                                       | 86.5                                                                                                               | 86.5                                                                                                        | 0                                      |
| 60.1                                                                                                                       | 60.1                                                                                                               | 60.1                                                                                                        | 0                                      |
| 60.1                                                                                                                       | 60.1                                                                                                               | \                                                                                                           | \                                      |
| 50.5                                                                                                                       | 50.5                                                                                                               | 50.5                                                                                                        | 0                                      |
| 50.3                                                                                                                       | 50.3                                                                                                               | 50.3                                                                                                        | 0                                      |
| 42.7                                                                                                                       | 42.7                                                                                                               | 42.7                                                                                                        | 0                                      |
| 42.7                                                                                                                       | 42.7                                                                                                               | 42.6                                                                                                        | 0.1                                    |
| 40.7                                                                                                                       | 40.7                                                                                                               | 40.7                                                                                                        | 0                                      |
| 33.1                                                                                                                       | 33.1                                                                                                               | 33.1                                                                                                        | 0                                      |
| 32.9                                                                                                                       | 32.9                                                                                                               | 32.9                                                                                                        | 0                                      |
| 28.5                                                                                                                       | 28.5                                                                                                               | 28.5                                                                                                        | 0                                      |
| 28.5                                                                                                                       | 28.5                                                                                                               | –                                                                                                           | –                                      |
| 25.5                                                                                                                       | 25.5                                                                                                               | 25.5                                                                                                        | 0                                      |
| 25.4                                                                                                                       | 25.4                                                                                                               | 25.4                                                                                                        | 0                                      |

| Tuntiwachwuttikul et al. Report, <sup>8</sup><br>Natural (–)-lansai B<br><sup>13</sup> C NMR, 75 MHz,<br>CDCl <sub>3</sub> | Reisman et al. Report <sup>7</sup><br>Synthetic (–)-lansai B<br><sup>13</sup> C NMR, 126 MHz,<br>CDCl <sub>3</sub> | This Work,<br>Synthetic<br>Deuterated<br>(±)-lansai B<br><sup>13</sup> C NMR, 175<br>MHz, CDCl <sub>3</sub> | Chemical<br>Shift<br>Difference,<br>Δδ |
|----------------------------------------------------------------------------------------------------------------------------|--------------------------------------------------------------------------------------------------------------------|-------------------------------------------------------------------------------------------------------------|----------------------------------------|
| δ 165.8                                                                                                                    | δ 165.7                                                                                                            | 165.8                                                                                                       | 0.1                                    |
| 165.6                                                                                                                      | 165.5                                                                                                              | 165.7                                                                                                       | 0.2                                    |
| 150.1                                                                                                                      | 150.1                                                                                                              | 149.9                                                                                                       | 0.2                                    |
| 148.6                                                                                                                      | 148.6                                                                                                              | 148.4                                                                                                       | 0.2                                    |
| 148.3                                                                                                                      | 148.2                                                                                                              | 147.5                                                                                                       | 0.7                                    |
| 138.7                                                                                                                      | 138.7                                                                                                              | 139.6                                                                                                       | 0.9                                    |
| 132.9                                                                                                                      | 132.9                                                                                                              | 133.2                                                                                                       | 0.3                                    |
| 132.8                                                                                                                      | 132.8                                                                                                              | 133.0                                                                                                       | 0.2                                    |
| 128.8                                                                                                                      | 128.7                                                                                                              | 128.8                                                                                                       | 0.1                                    |
| 126.3                                                                                                                      | 126.3                                                                                                              | 126.5                                                                                                       | 0.2                                    |
| 122.3                                                                                                                      | 122.3                                                                                                              | 122.4                                                                                                       | 0.1                                    |
| 120.2                                                                                                                      | 120.2                                                                                                              | 120.3                                                                                                       | 0.1                                    |
| 118.1                                                                                                                      | 118.1                                                                                                              | 118.3                                                                                                       | 0.2                                    |
| 110.2                                                                                                                      | 110.1                                                                                                              | 110.3                                                                                                       | 0.2                                    |
| 105.8                                                                                                                      | 105.8                                                                                                              | 106.3                                                                                                       | 0.5                                    |
| 105.4                                                                                                                      | 105.4                                                                                                              | 106.1                                                                                                       | 0.7                                    |
| 86.9                                                                                                                       | 86.9                                                                                                               | 87.1                                                                                                        | 0.2                                    |
| 86.6                                                                                                                       | 86.5                                                                                                               | 86.7                                                                                                        | 0.2                                    |
| 60.1                                                                                                                       | 60.1                                                                                                               | 60.2                                                                                                        | 0.1                                    |
| 60.1                                                                                                                       | 60.1                                                                                                               | 59.8 (t, <i>J</i> = 21.9<br>Hz)                                                                             | 0.3                                    |
| 50.5                                                                                                                       | 50.5                                                                                                               | 50.5                                                                                                        | 0                                      |
| 50.3                                                                                                                       | 50.3                                                                                                               | 50.3                                                                                                        | 0                                      |
| 42.7                                                                                                                       | 42.7                                                                                                               | 42.7                                                                                                        | 0                                      |
| 42.7                                                                                                                       | 42.7                                                                                                               | 42.6                                                                                                        | 0.1                                    |
| 40.7                                                                                                                       | 40.7                                                                                                               | 40.7                                                                                                        | 0                                      |
| 33.1                                                                                                                       | 33.1                                                                                                               | 33.8                                                                                                        | 0.7                                    |
| 32.9                                                                                                                       | 32.9                                                                                                               | 33.1                                                                                                        | 0.2                                    |
| 28.5                                                                                                                       | 28.5                                                                                                               | 28.5                                                                                                        | 0                                      |
| 28.5                                                                                                                       | 28.5                                                                                                               | –                                                                                                           | –                                      |
| 25.5                                                                                                                       | 25.5                                                                                                               | 25.6                                                                                                        | 0.1                                    |
| 25.4                                                                                                                       | 25.4                                                                                                               | 25.5                                                                                                        | 0.1                                    |

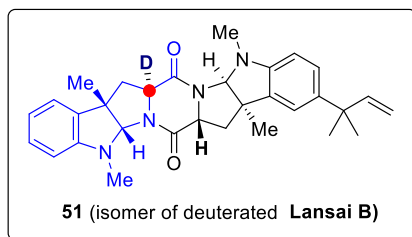

**$^1\text{H}$  NMR** (400 MHz,  $\text{CDCl}_3$ )  $\delta$  7.14 – 7.08 (m, 2H), 7.05 (d,  $J = 7.0$  Hz, 1H), 7.02 (d,  $J = 1.8$  Hz, 1H), 6.71 (t,  $J = 7.3$  Hz, 1H), 6.38 (d,  $J = 7.8$  Hz, 1H), 6.31 (d,  $J = 8.2$  Hz, 1H), 5.99 (dd,  $J = 17.4, 10.6$  Hz, 1H), 5.48 (s, 1H), 5.47 (s, 1H), 5.03 (dd,  $J = 14.4, 1.2$  Hz, 1H), 4.99 (dd,  $J = 7.6, 1.2$  Hz, 1H), 4.04 (dd,  $J = 12.3, 5.2$  Hz, 1H), 2.98 (s, 3H), 2.96 (s, 3H), 2.69 – 2.65 (m, 2H), 2.03 – 1.97 (m, 2H), 1.47 (s, 3H), 1.46 (s, 3H), 1.36 (s, 6H).

**$^{13}\text{C}$  NMR** (176 MHz,  $\text{CDCl}_3$ )  $\delta$  164.8, 164.5, 150.7, 148.7, 148.6, 138.7, 132.4, 132.3, 128.8, 126.4, 122.9, 120.7, 118.0, 110.1, 105.4, 105.1, 87.4, 87.0, 59.7, 59.4 (t,  $J = 22.0$  Hz), 50.9, 50.7, 45.2, 45.0, 40.7, 32.3, 31.9, 28.5, 26.0, 25.8.

**HRMS** (ESI)  $m/z$  calculated for  $\text{C}_{31}\text{H}_{36}\text{DN}_4\text{O}_2$  [ $\text{M}+\text{H}^+$ ] 498.2974, found 498.2969.

## 7. X-ray structure of compound **32**, **51**

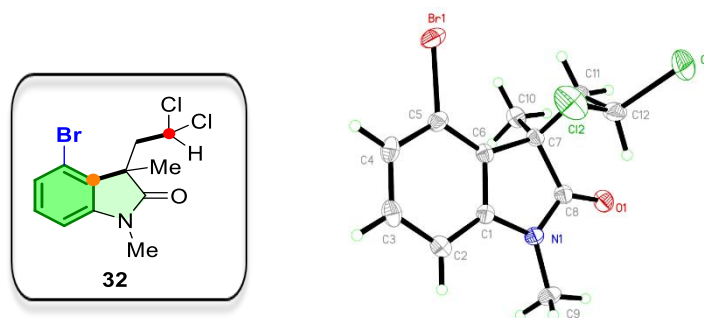

A colorless block shaped crystal of **32** ( $\text{C}_{12}\text{H}_{12}\text{BrCl}_2\text{NO}$ ) was used for the X-ray crystallographic analysis. The X-ray intensity data were measured at 173(2) K, on a Bruker D8 VENTURE CMOS photon 100 diffractometer with helios mx multilayer monochromator Cu-K $\alpha$  radiation ( $\lambda = 1.54178$  Å). The X-ray crystallographic files, in CIF format, are available from the Cambridge Crystallographic Data Centre on quoting the deposition numbers **CCDC 2128341** for **32**. Copies of the data can be obtained free of charge from the Director, CCDC, 12 Union Road, Cambridge CB2 IEZ, UK (Fax:



+44-1223-336033; E-mail: [deposit@ccdc.cam.ac.uk](mailto:deposit@ccdc.cam.ac.uk) or [www: http://www.ccdc.cam.ac.uk](http://www.ccdc.cam.ac.uk)).

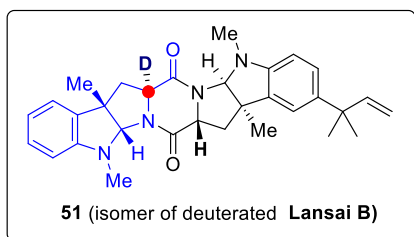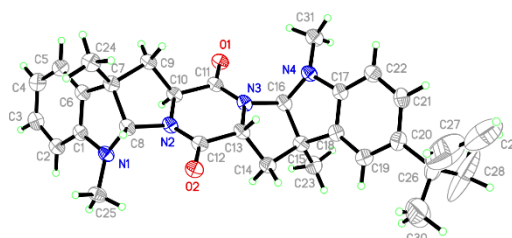

A colorless block shaped crystal of **51** ( $C_{31}H_{35}DN_4O_2$ ) was used for the X-ray crystallographic analysis. The X-ray intensity data were measured at 173(2) K, on a Bruker D8 VENTURE CMOS photon 100 diffractometer with helios mx multilayer monochromator Cu-K $\alpha$  radiation ( $\lambda = 1.54178 \text{ \AA}$ ). The X-ray crystallographic files, in CIF format, are available from the Cambridge Crystallographic Data Centre on quoting the deposition numbers **CCDC 2128343** for **51**. Copies of the data can be obtained free of charge from the Director, CCDC, 12 Union Road, Cambridge CB2 IEZ, UK (Fax: +44-1223-336033; E-mail: [deposit@ccdc.cam.ac.uk](mailto:deposit@ccdc.cam.ac.uk) or [www: http://www.ccdc.cam.ac.uk](http://www.ccdc.cam.ac.uk)).

## 8. Reference

- [1] M.-Z. Lu, T.-P. Loh, *Org. Lett.* **2014**, *16*, 4698.
- [2] Y. Tian, Z.-Q. Liu, *RSC Adv.* **2014**, *4*, 64855.
- [3] B. V. S. Reddy, V. Swathi, M. Swain, M. P. Bhadra, B. Sridhar, D. Satyanarayana, B. Jagadeesh, *Org. Lett.* **2014**, *16*, 6267.
- [4] D. C. Fabry, M. Stodulski, S. Hoerner, T. Gulder, *Chem. Eur. J.* **2012**, *18*, 10834.
- [5] Z. Cui, D.-M. Du, *Adv. Synth. Catal.* **2018**, *360*, 93.
- [6] W. Ou, G. Zhang, J. Wu, C. Su, *ACS Catal.* **2019**, *9*, 5178.
- [7] H. Wang, S. E. Reisman, *Angew. Chem. Int. Ed.* **2014**, *53*, 6206.
- [8] P. Tuntiwachwuttikul, T. Taechowisan, A. Wanbanjob, S. Thadaniti, W. C. Taylor, *Tetrahedron* **2008**, *64*, 7583.

NAME cc-i94-5  
SOLVENT CDCl3  
SF 400.1500096 MHz

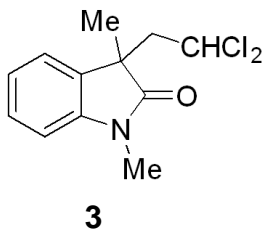

7.334  
7.331  
7.315  
7.312  
7.296  
7.293  
7.260  
7.201  
7.199  
7.183  
7.181  
7.112  
7.110  
7.093  
7.091  
7.075  
7.073  
6.880  
6.860  
5.395  
5.384  
5.372  
5.361  
3.199  
3.057  
3.034  
3.020  
2.997  
2.724  
2.714  
2.687  
2.677  
1.388

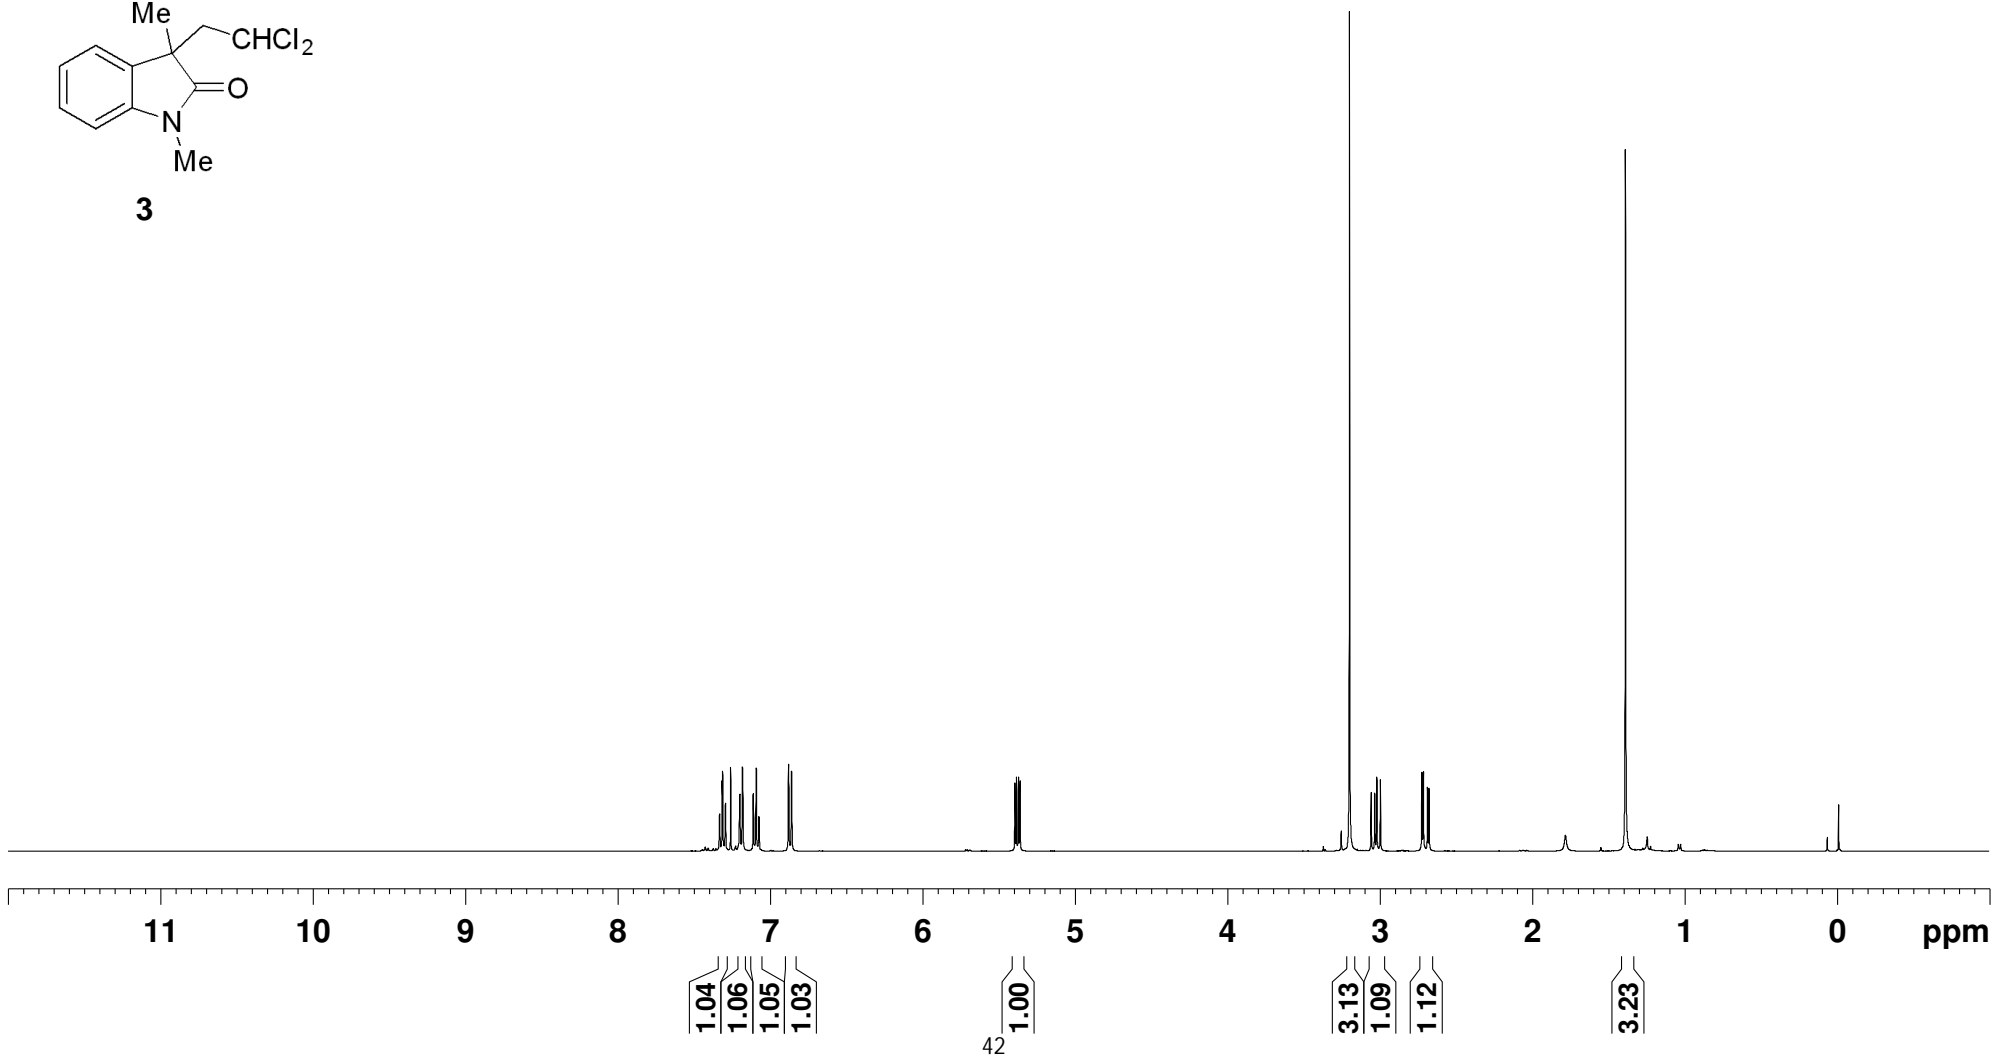

— 178.95

— 143.37

— 131.00

— 128.59

— 122.64

— 122.62

— 108.57

77.32

77.00

76.68

— 69.61

— 50.11

— 47.12

— 26.41

— 25.37

NAME cc-i94-5  
SOLVENT CDC13  
SF 100.6178037 MHz

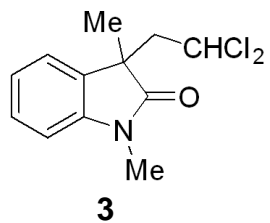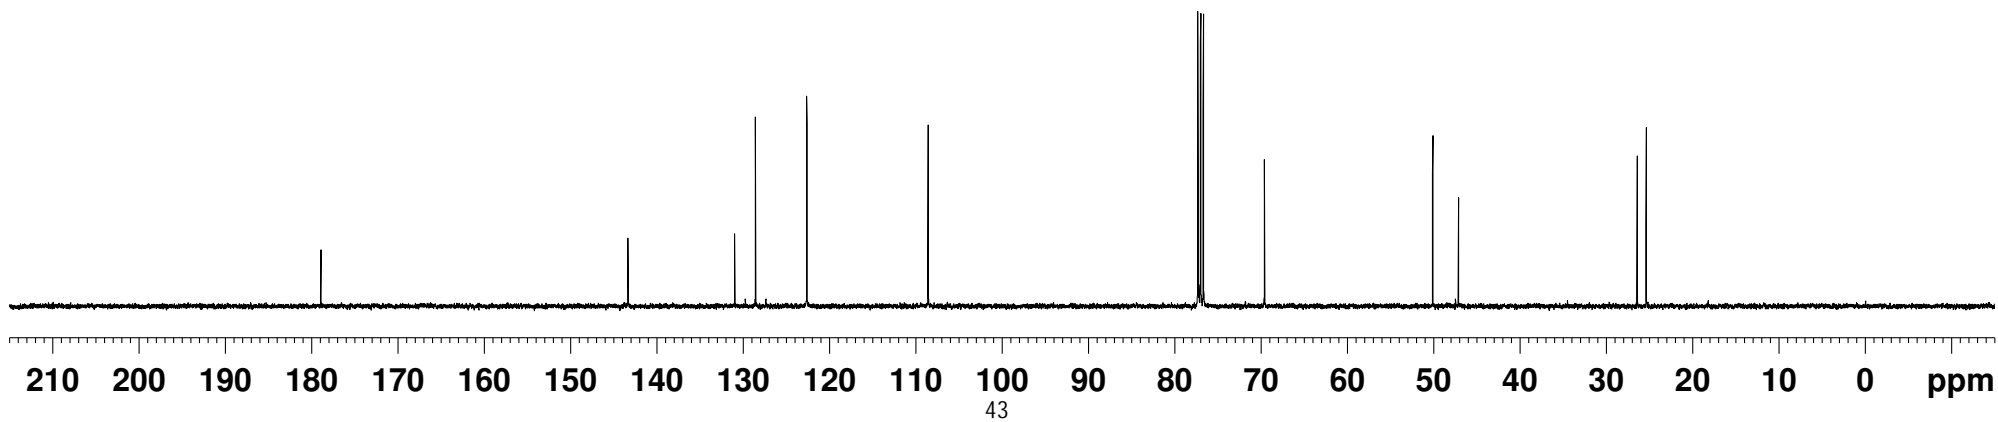

NAME cc-g110-5  
SOLVENT CDC13  
SF 400.1500096 MHz

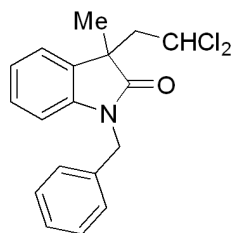

4

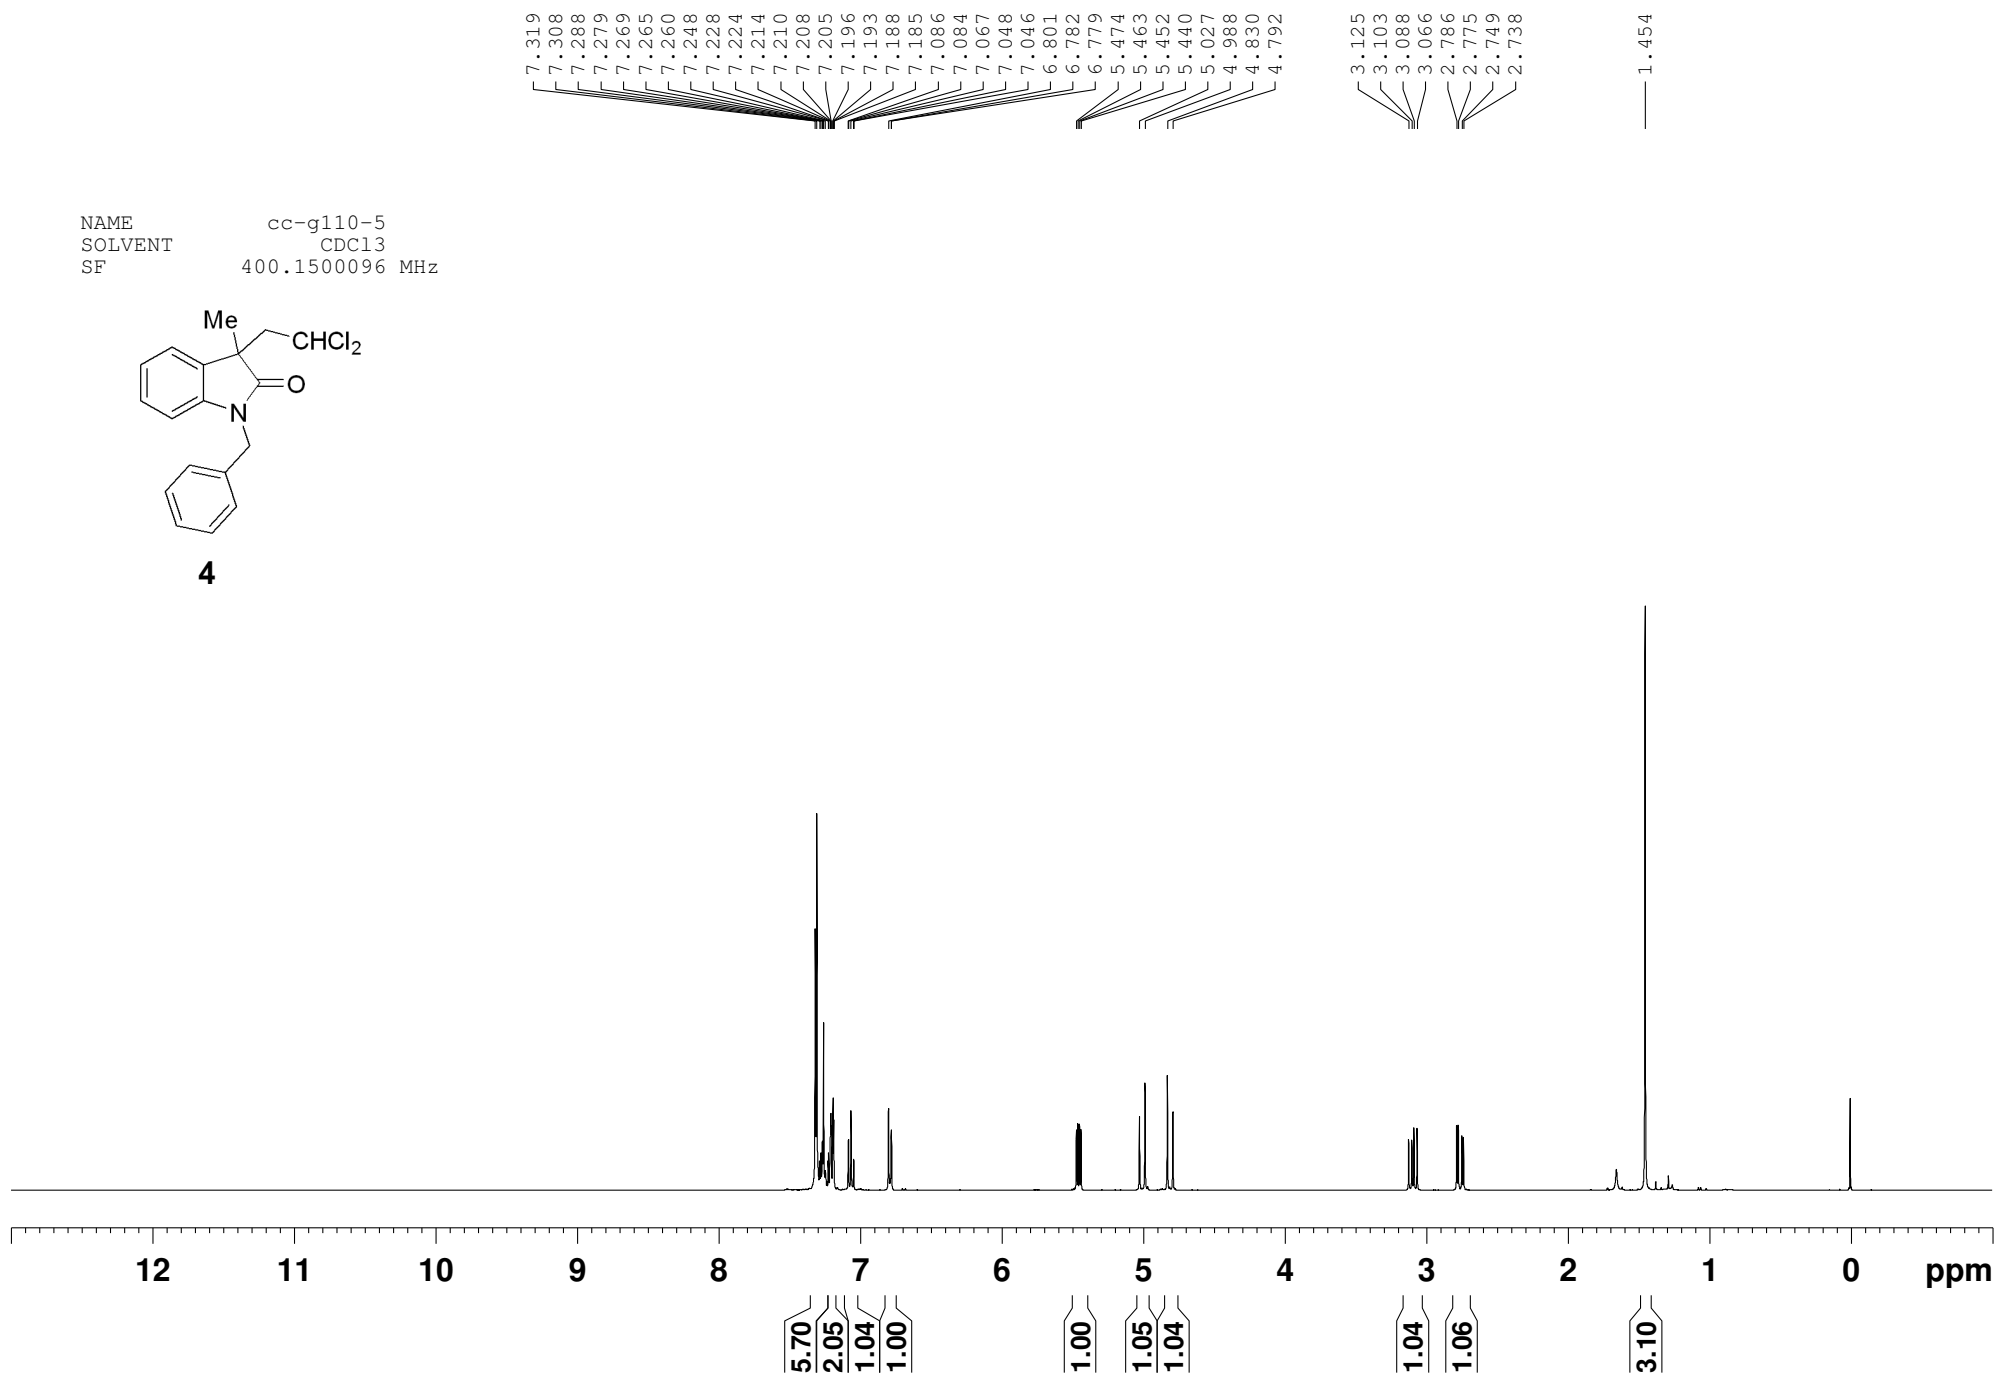

NAME cc-g110-5  
SOLVENT CDCl3  
SF 100.6178030 MHz

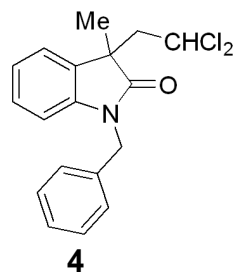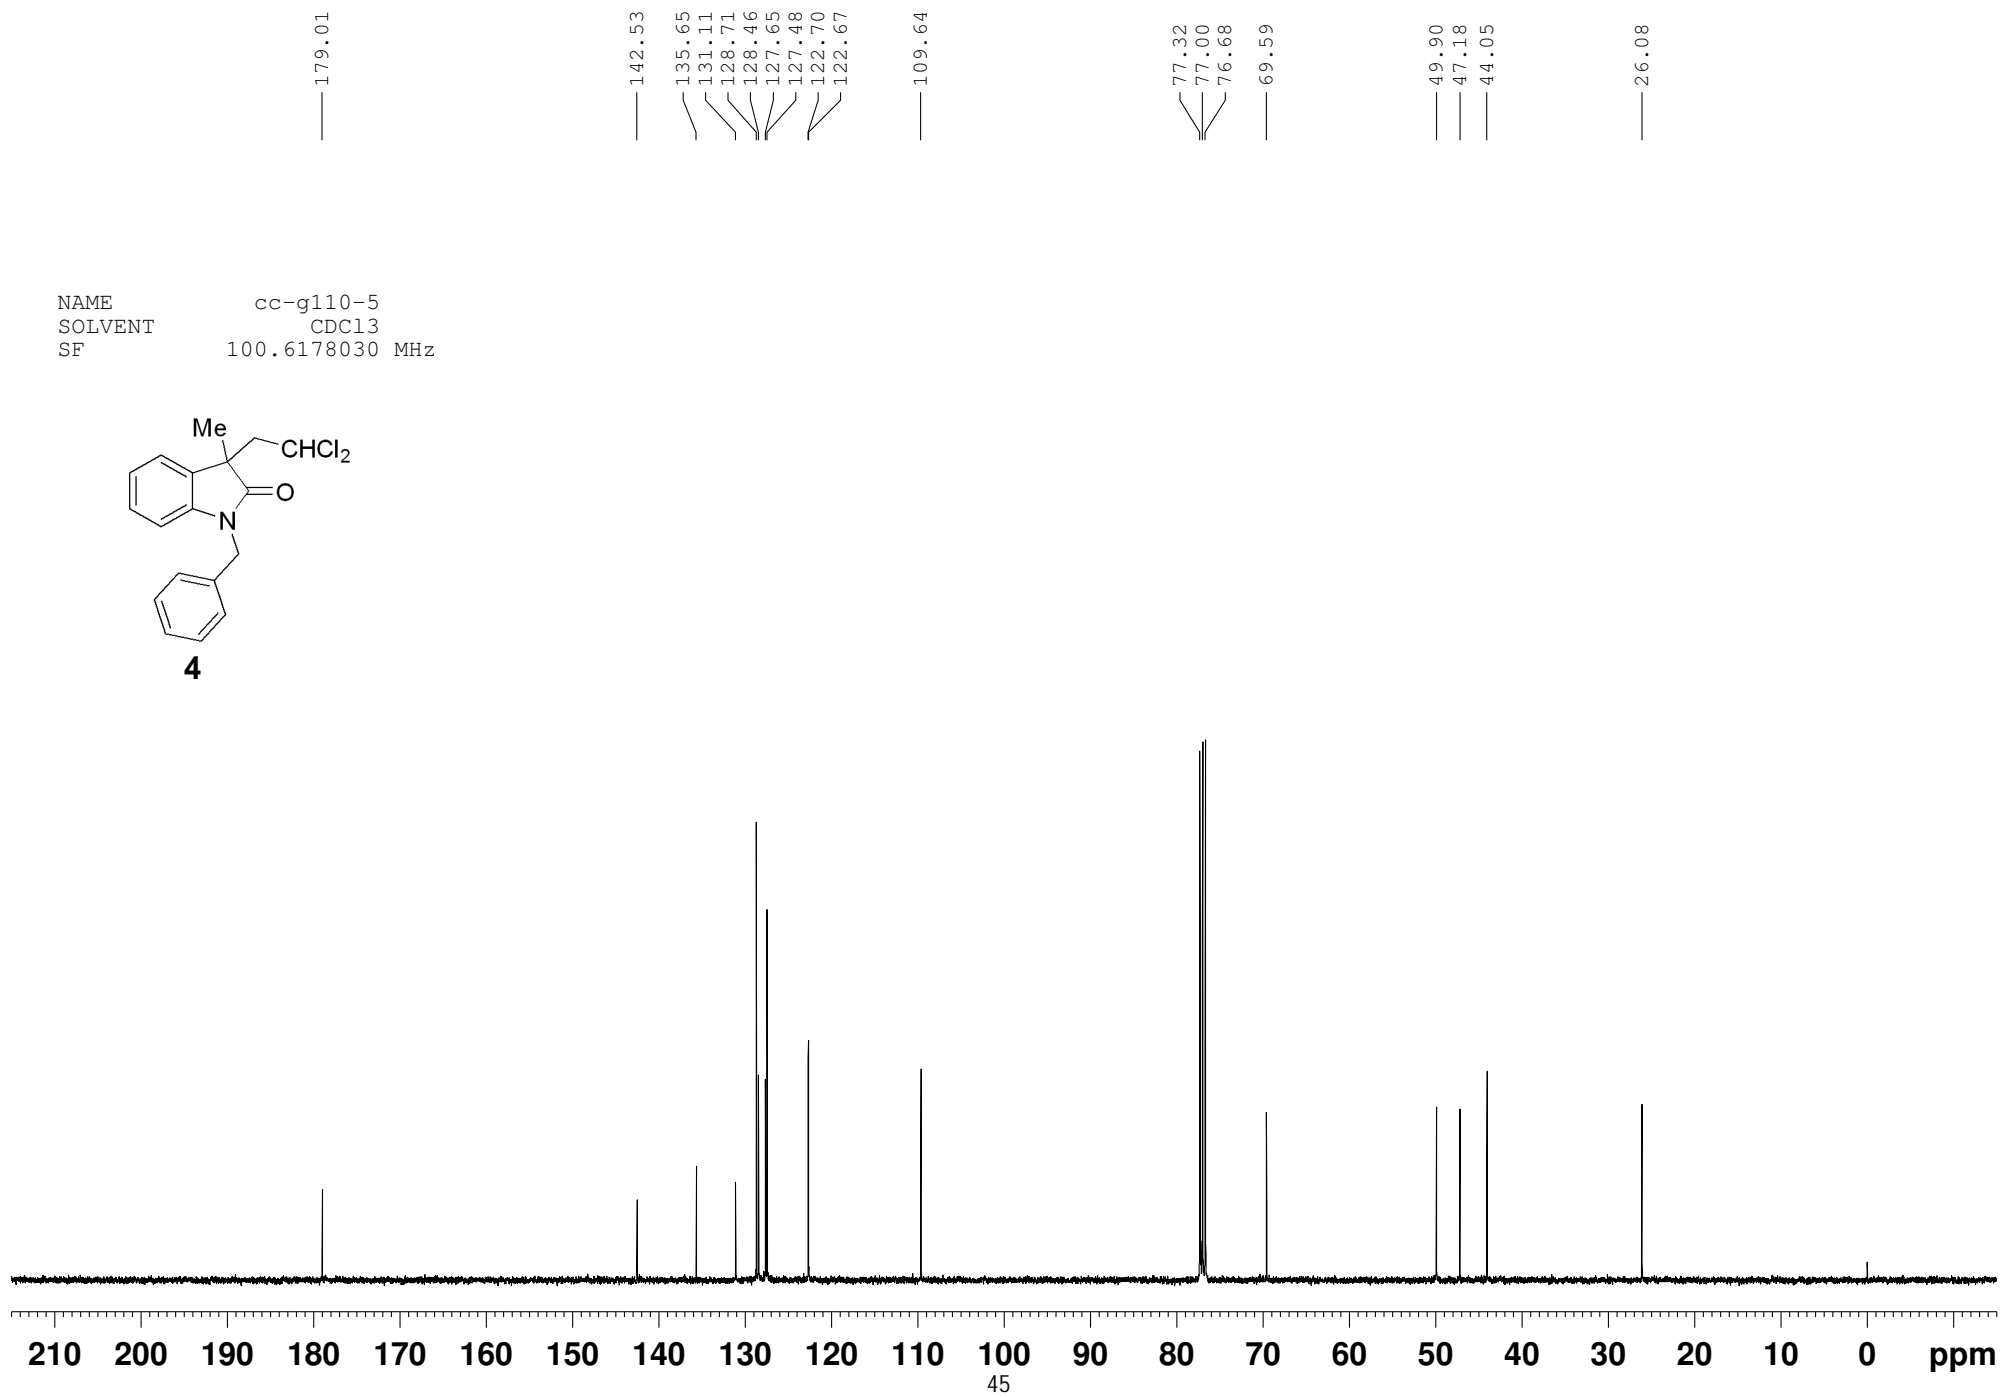

NAME cc-G128-3  
SOLVENT CDCl3  
SF 400.1500100 MHz

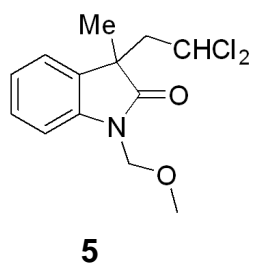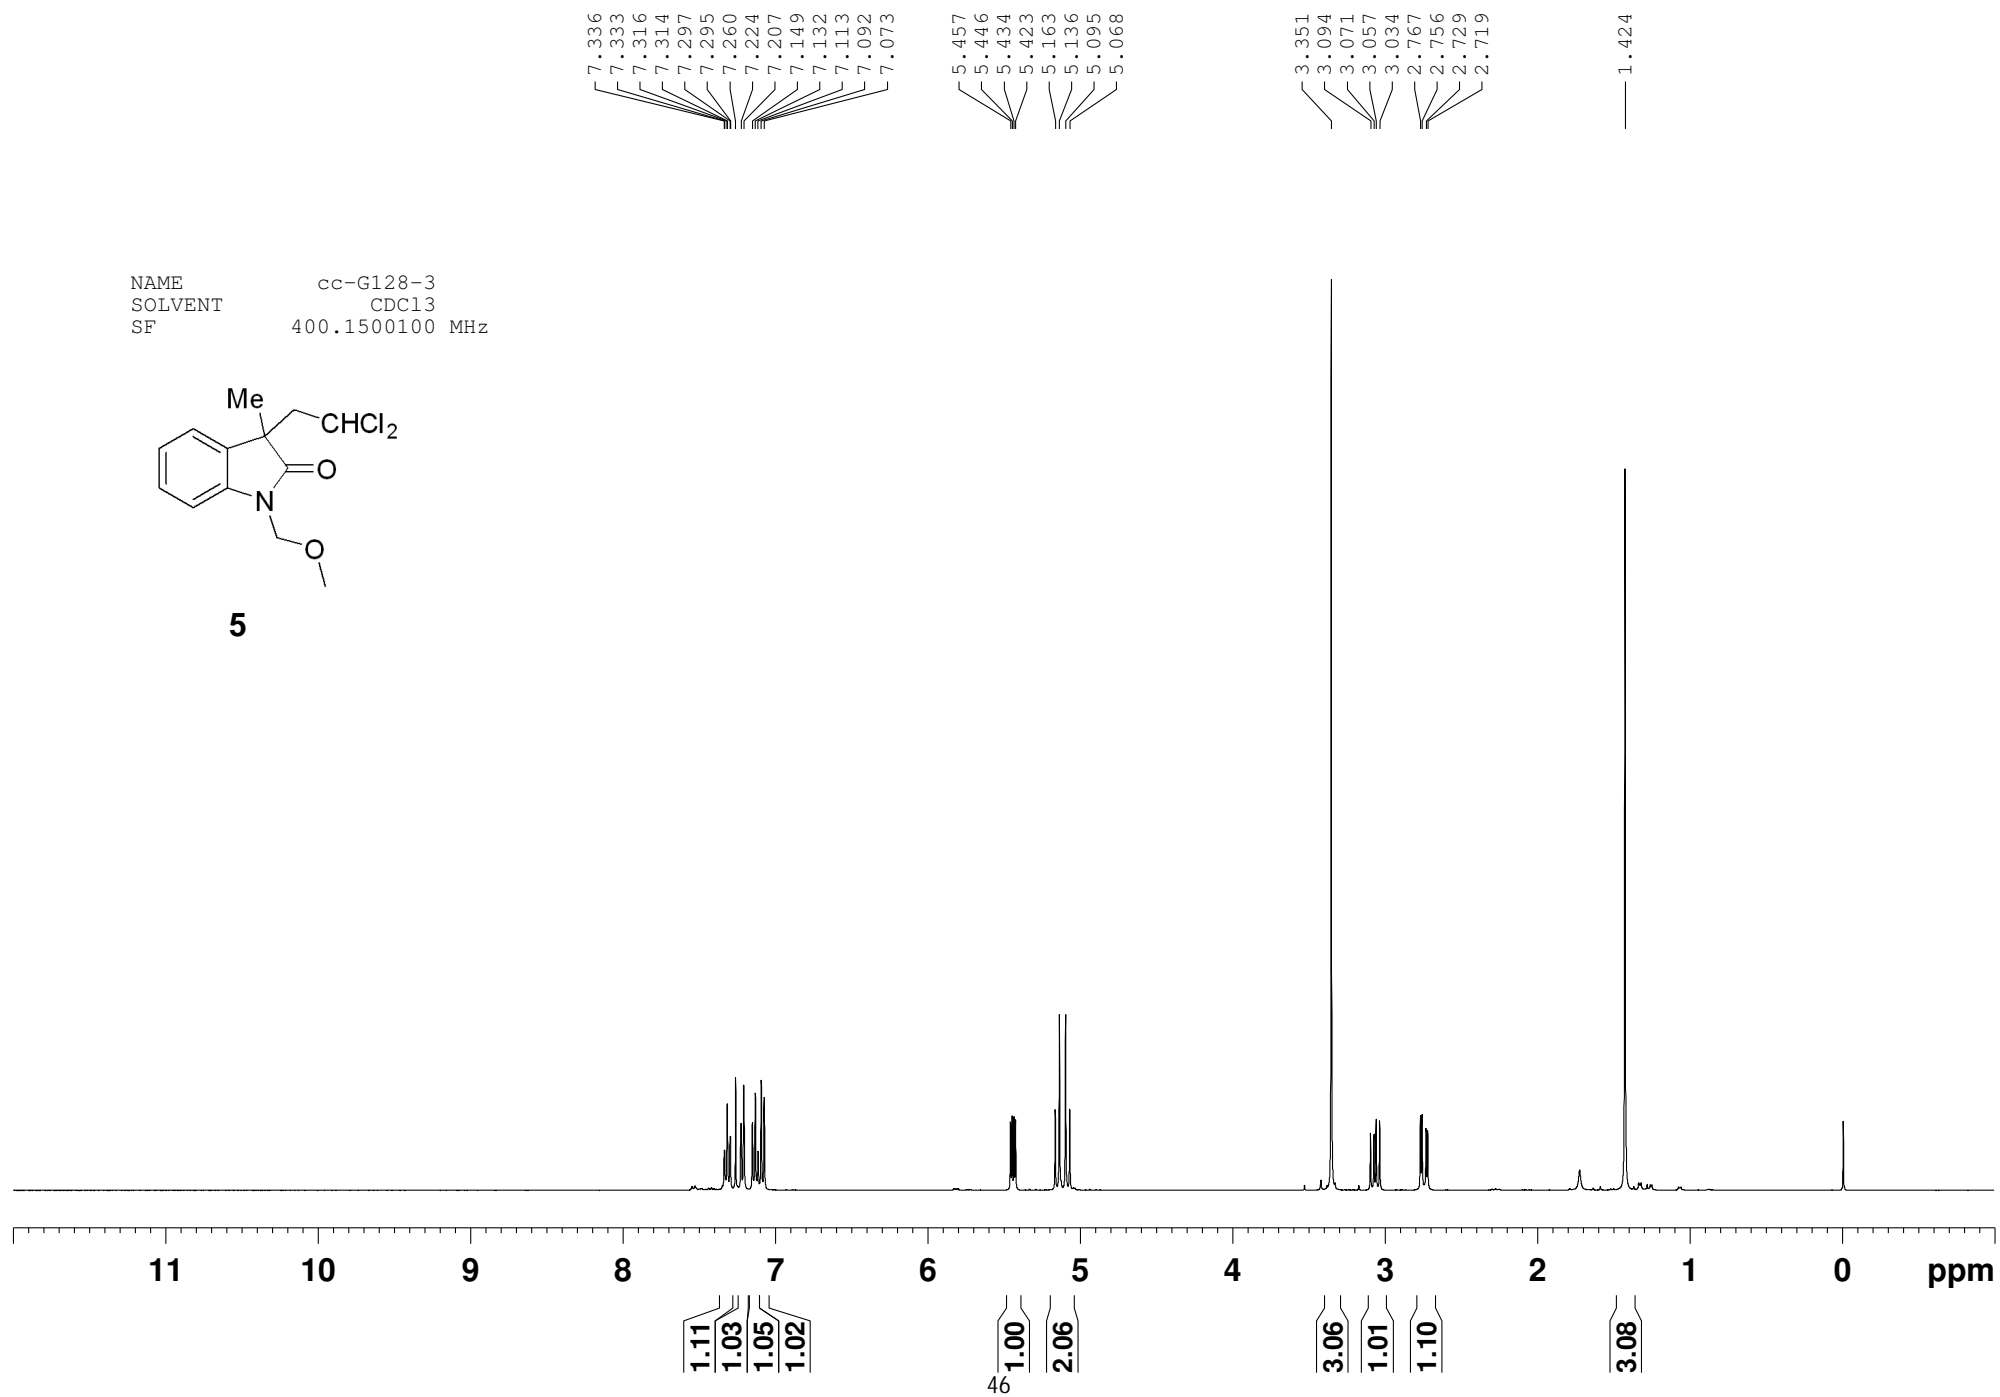

179.63

141.69

130.55

128.71

123.21

122.71

110.08

77.32

77.00

76.68

71.78

69.57

56.52

49.90

47.51

26.28

NAME cc-g128-3-1127  
SOLVENT CDCl3  
SF 100.6178033 MHz

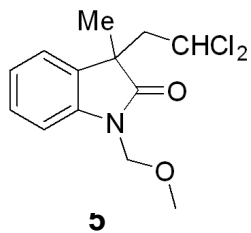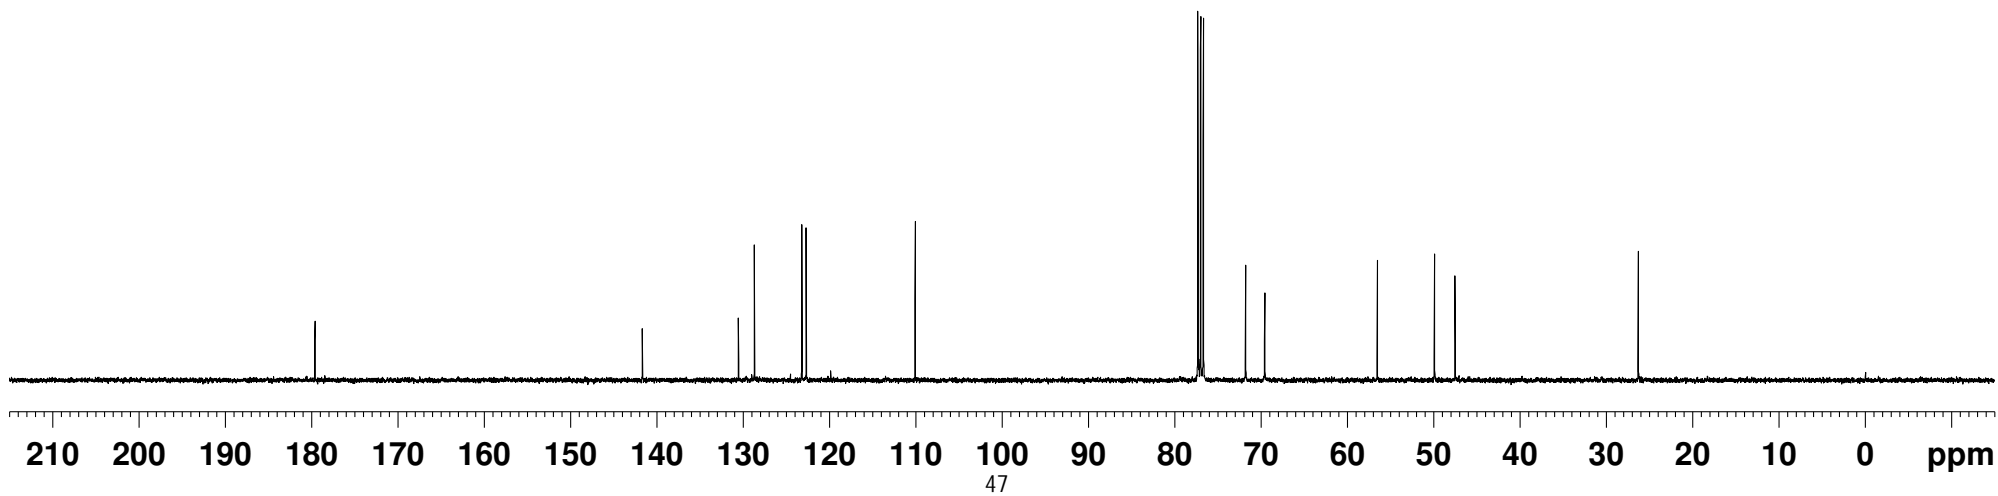

NAME CC-G110-11-down-0717  
SOLVENT CDCl3  
SF 400.1500401 MHz

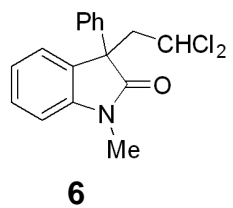

7.360  
7.358  
7.341  
7.339  
7.322  
7.319  
7.271  
7.266  
7.261  
7.246  
7.241  
7.237  
7.231  
7.221  
7.202  
7.196  
7.183  
7.132  
7.113  
7.094  
6.881  
6.861  
5.397  
5.388  
5.373  
5.364

3.548  
3.525  
3.512  
3.488  
3.112  
3.044  
3.034  
3.007  
2.998

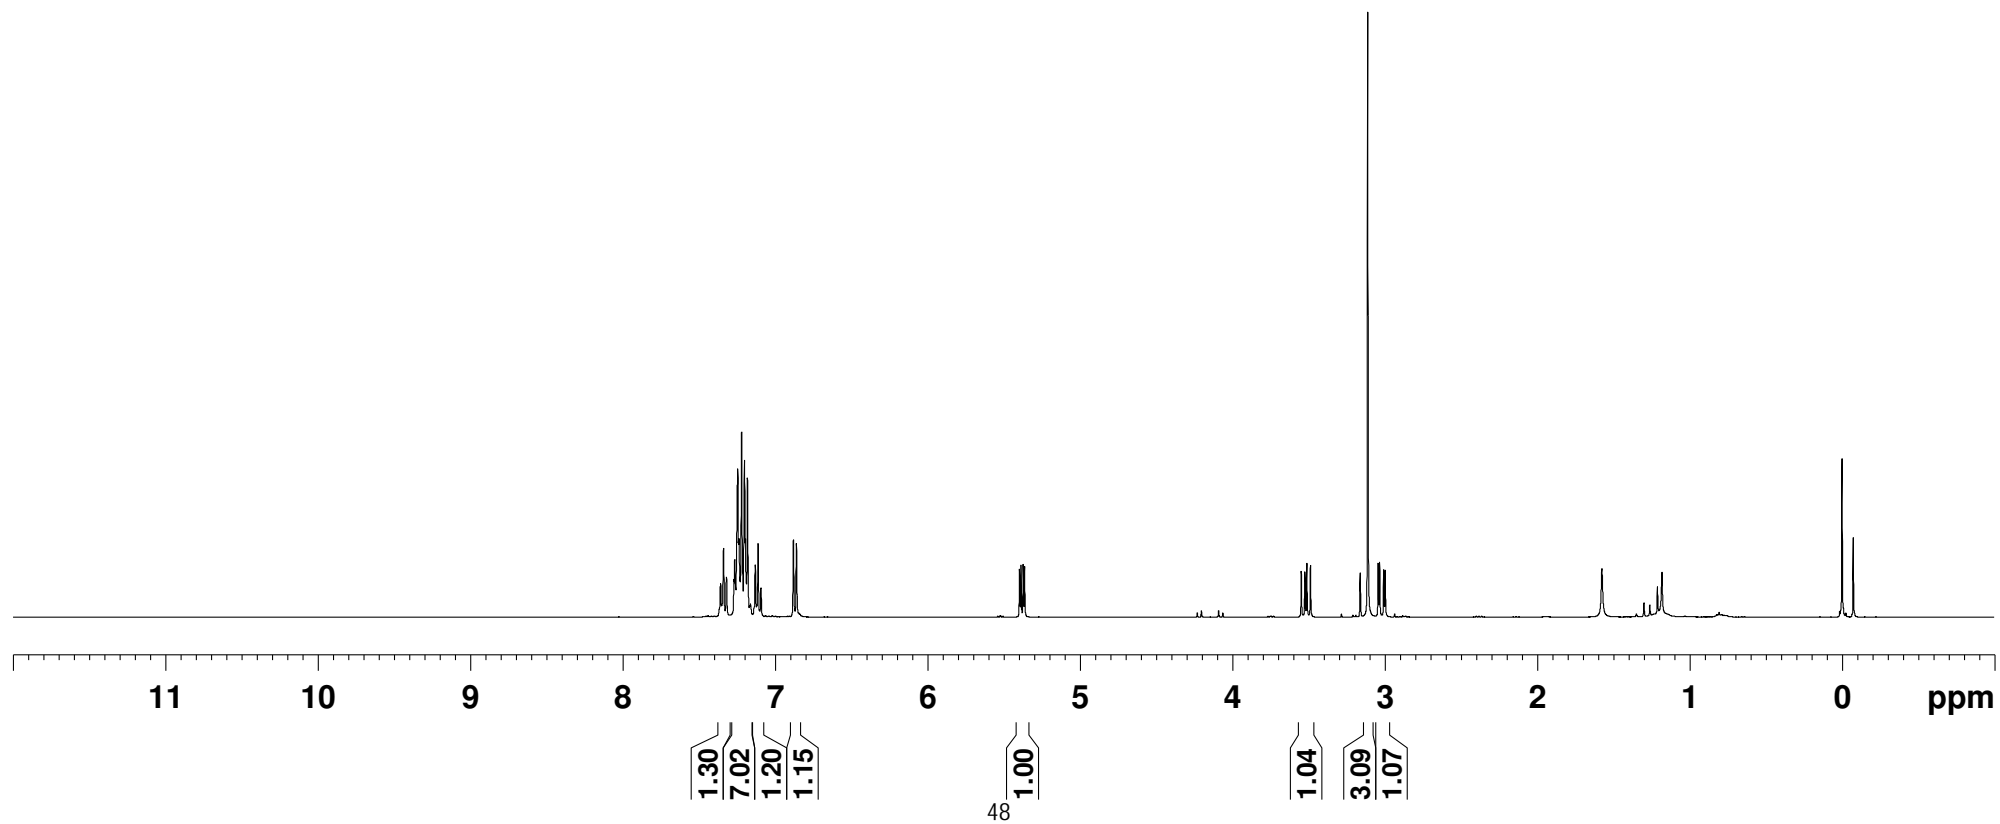



NAME CC-G110-11-down-0717  
SOLVENT CDCl3  
SF 100.6178030 MHz

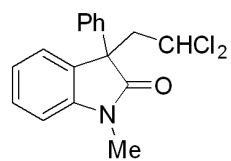

6

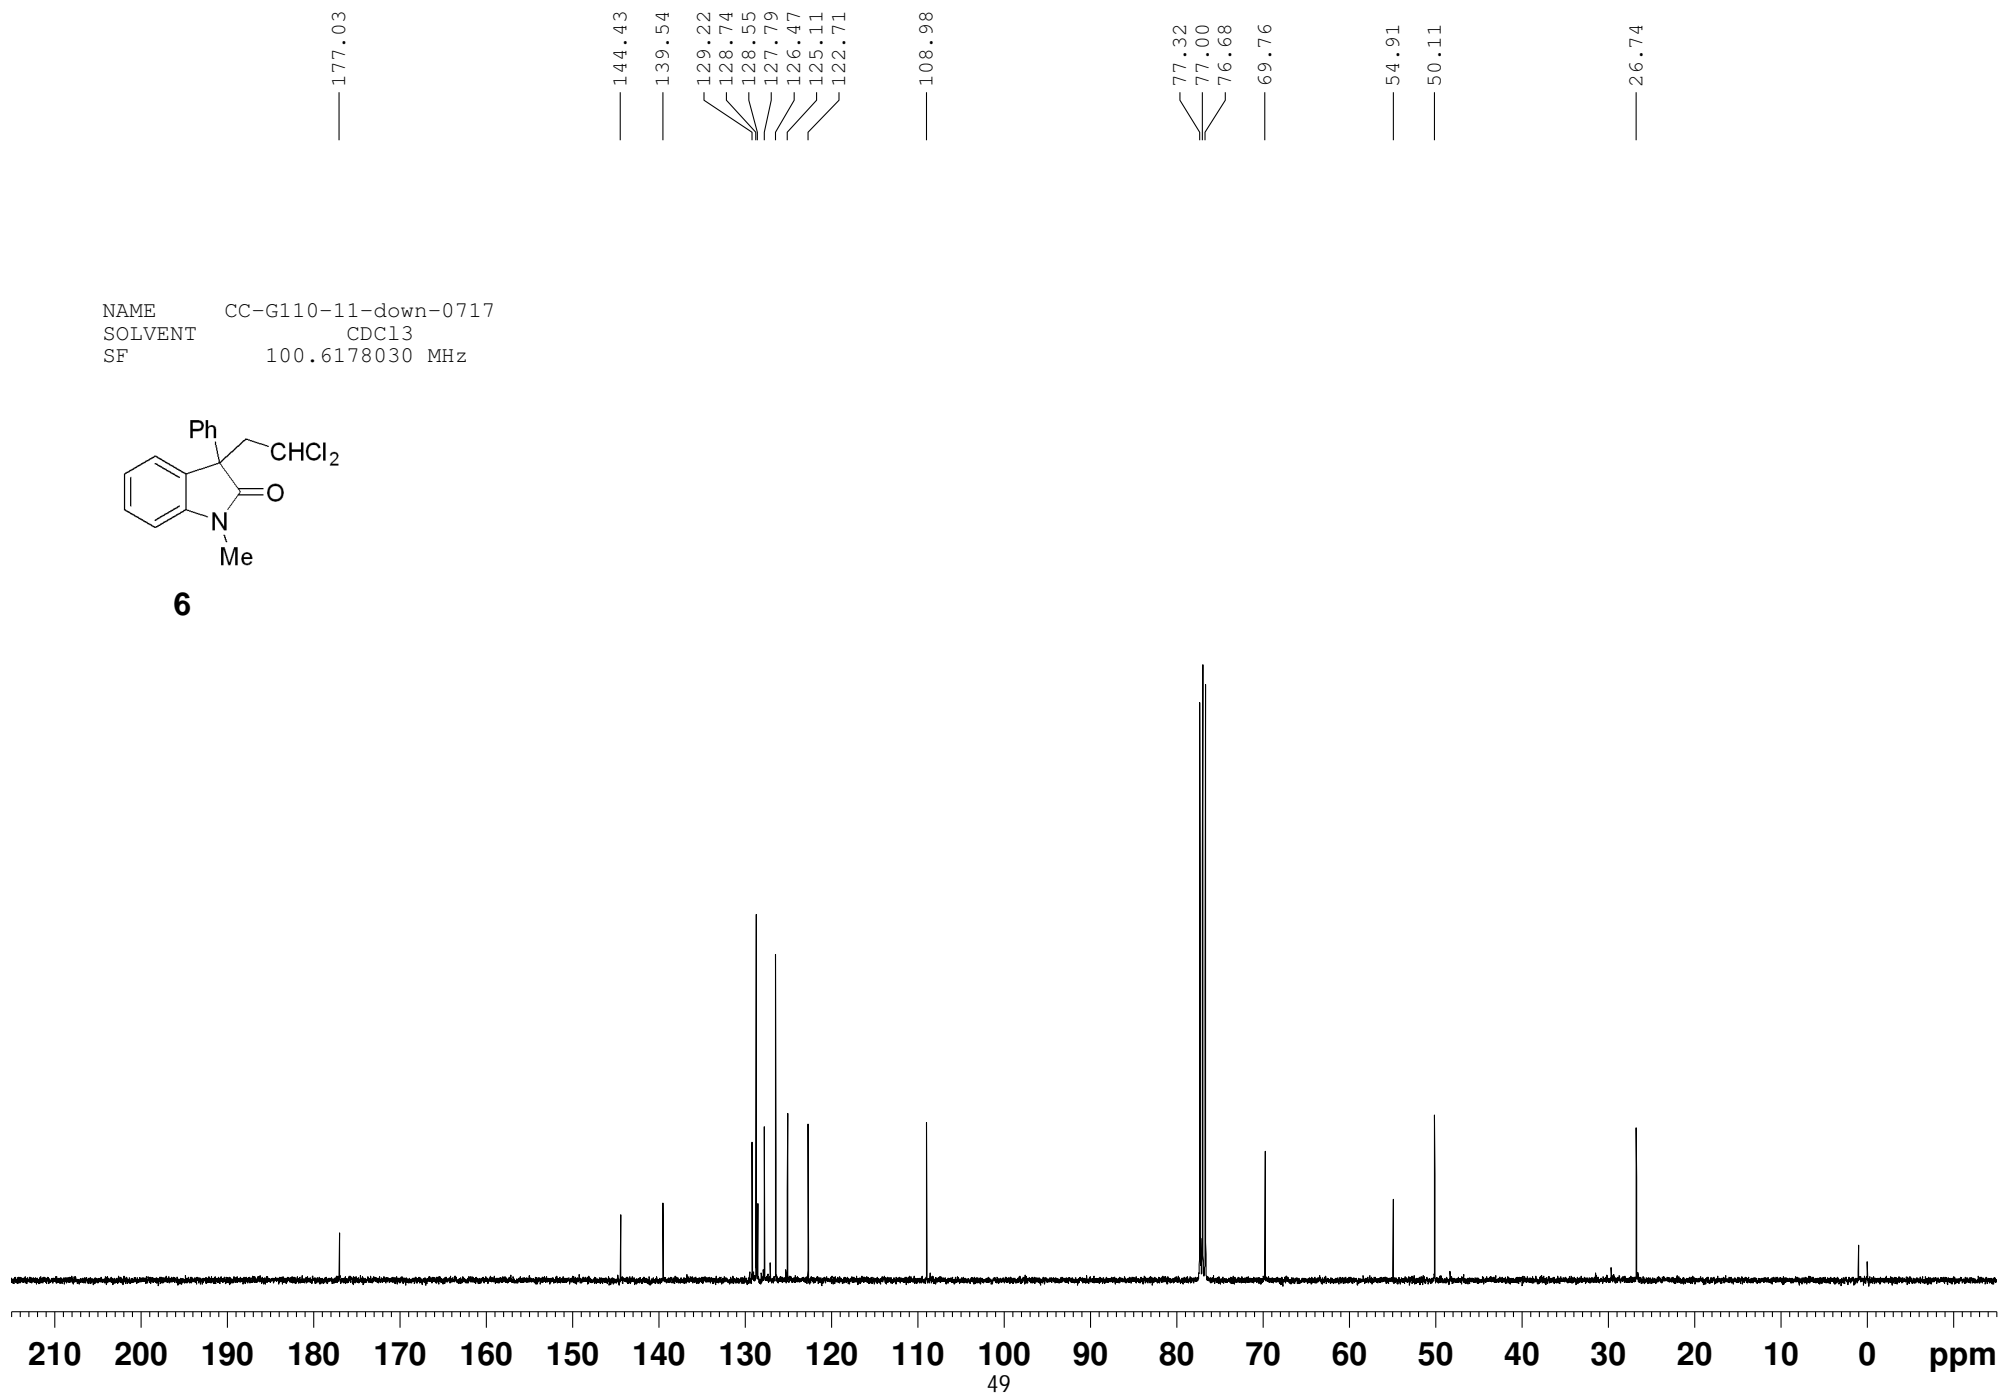

NAME cc-g116-1  
SOLVENT CDC13  
SF 400.1500096 MHz

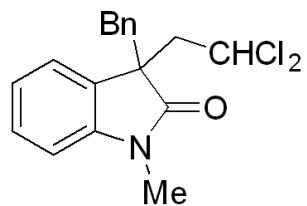

7

7.260  
7.255  
7.239  
7.236  
7.220  
7.216  
7.141  
7.139  
7.123  
7.121  
7.109  
7.105  
7.102  
7.094  
7.092  
7.087  
7.080  
7.073  
7.070  
7.066  
7.059  
7.056  
7.045  
7.041  
7.028  
7.024  
7.019  
6.785  
6.783  
6.766  
6.620  
6.600  
5.444  
5.434  
5.421  
5.411  
3.215  
3.192  
3.178  
3.155  
3.118  
3.086  
3.009  
2.977  
2.870  
2.859  
2.833

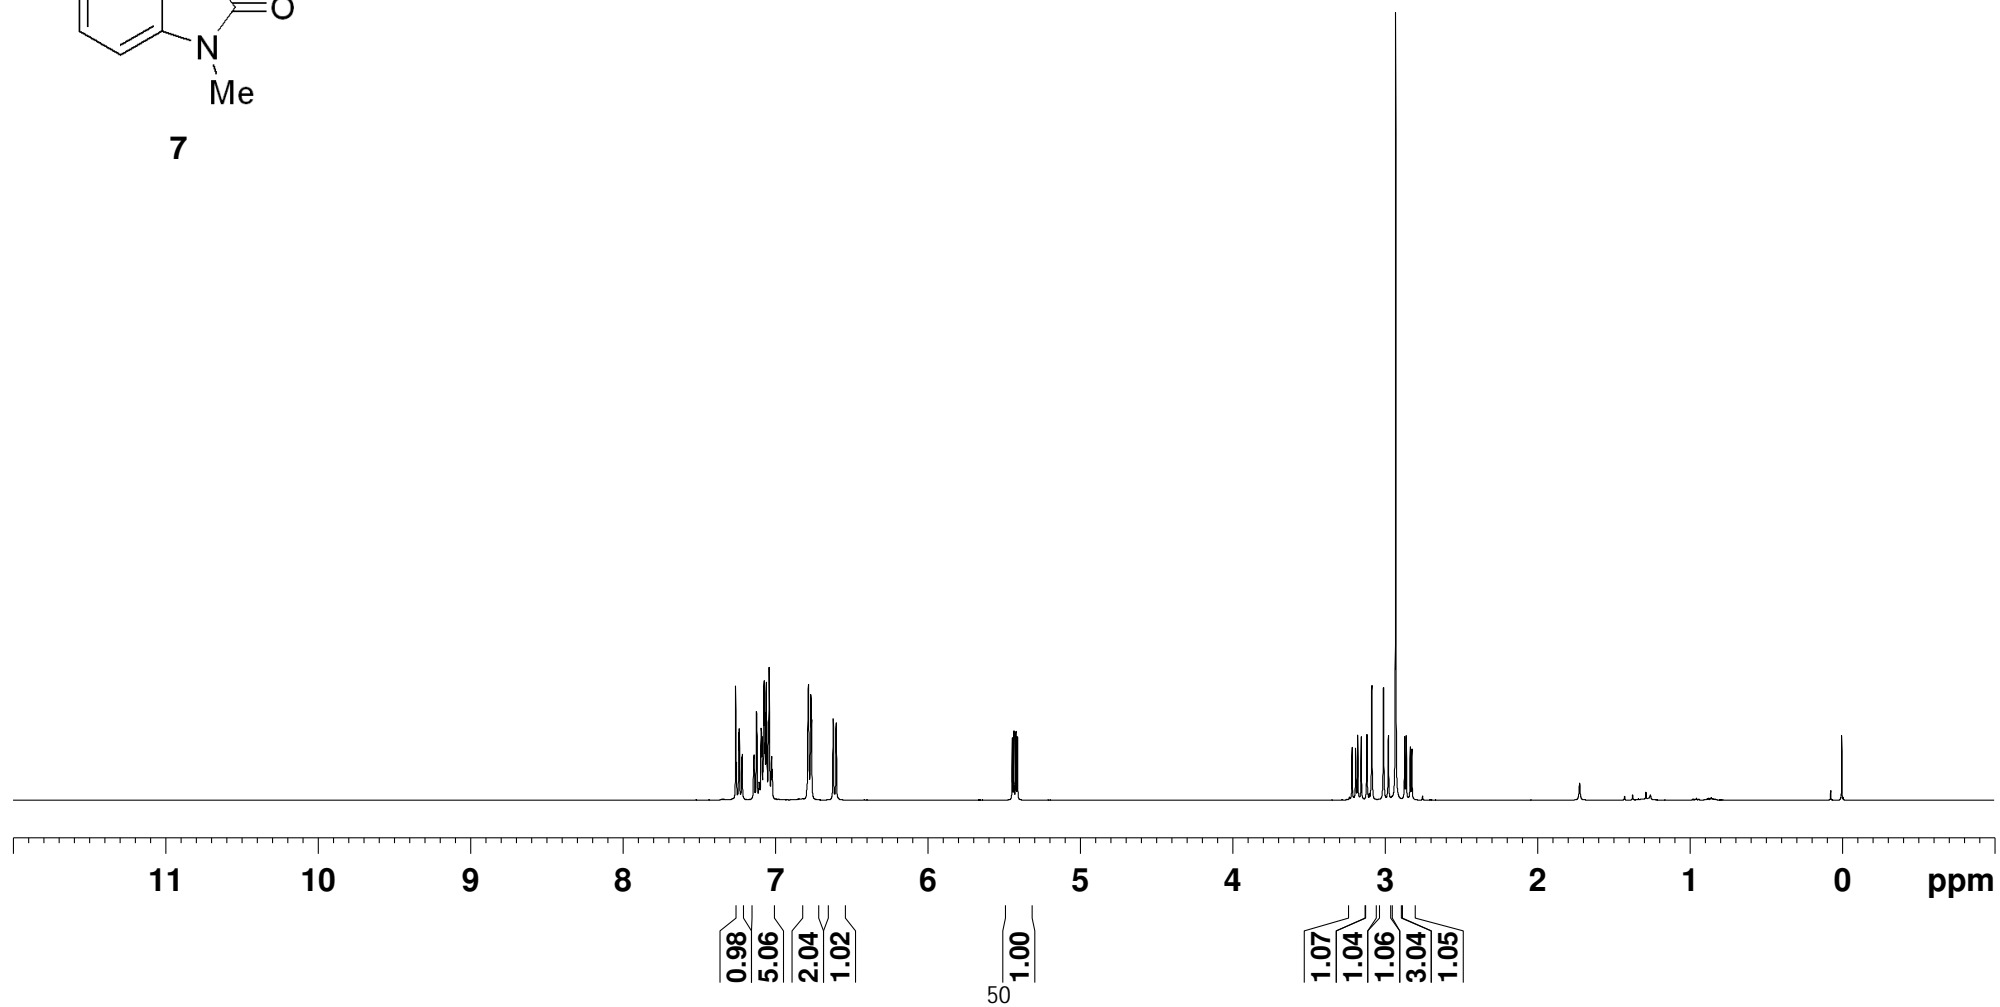

NAME cc-g116-1  
SOLVENT CDCl3  
SF 100.6178038 MHz

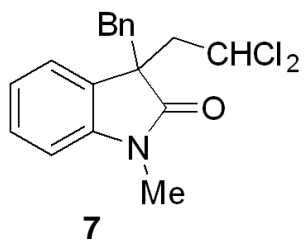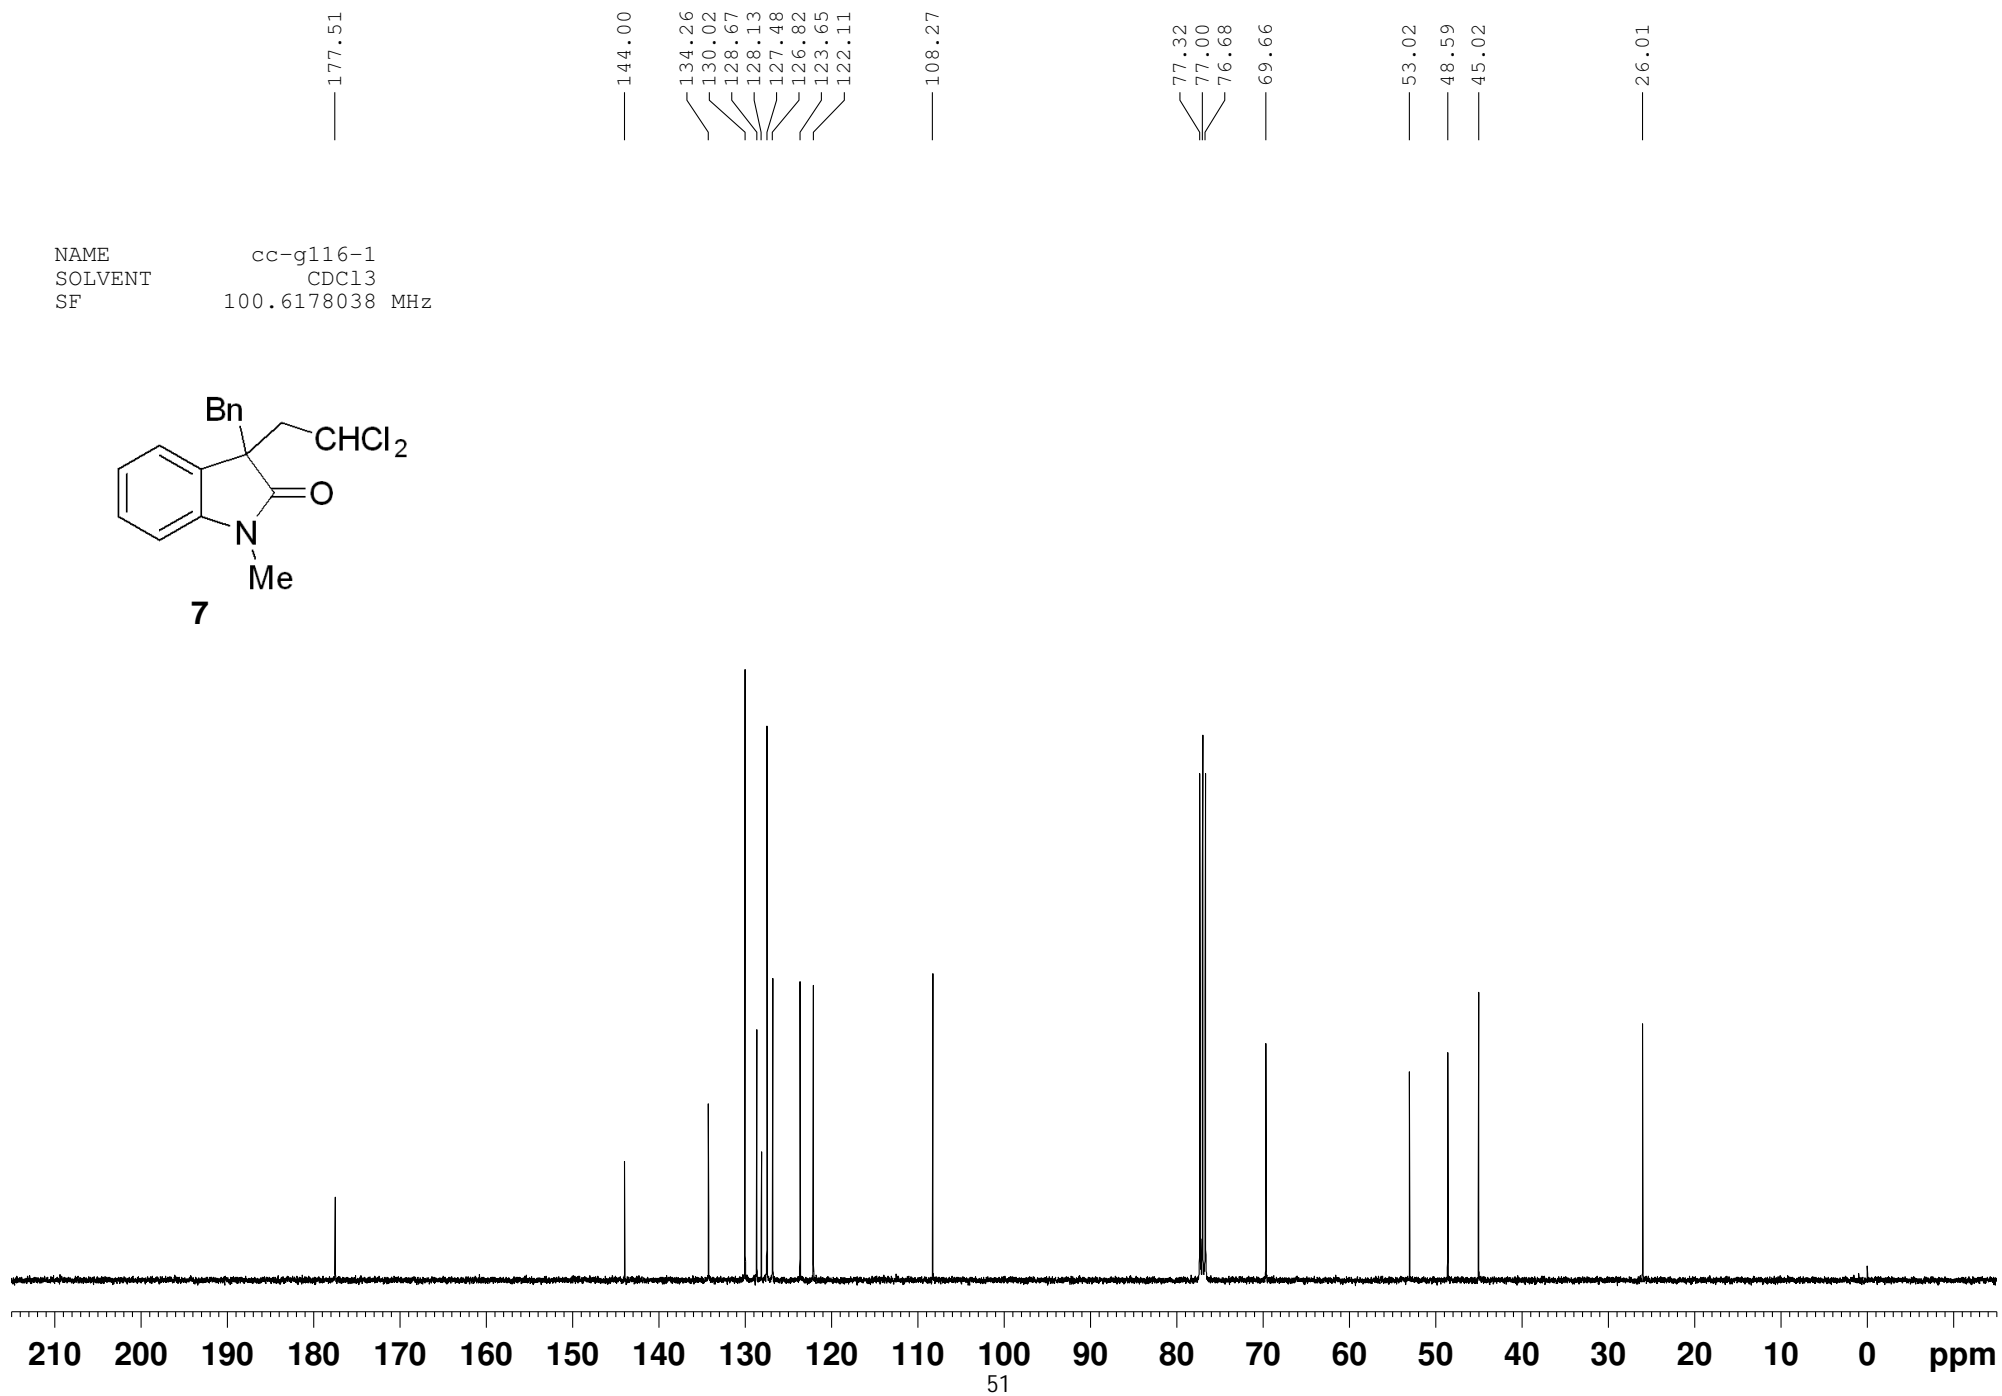

NAME CC-G161-2  
SOLVENT CDC13  
SF 400.1500099 MHz

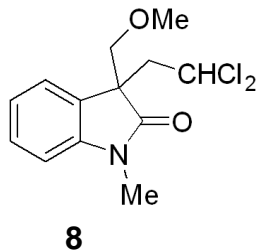

7.354  
7.352  
7.335  
7.332  
7.315  
7.296  
7.260  
7.110  
7.091  
7.072  
6.877  
6.858

5.418  
5.405  
5.402  
5.398  
5.385

3.624  
3.602  
3.410  
3.388  
3.252  
3.195  
2.966  
2.955  
2.945

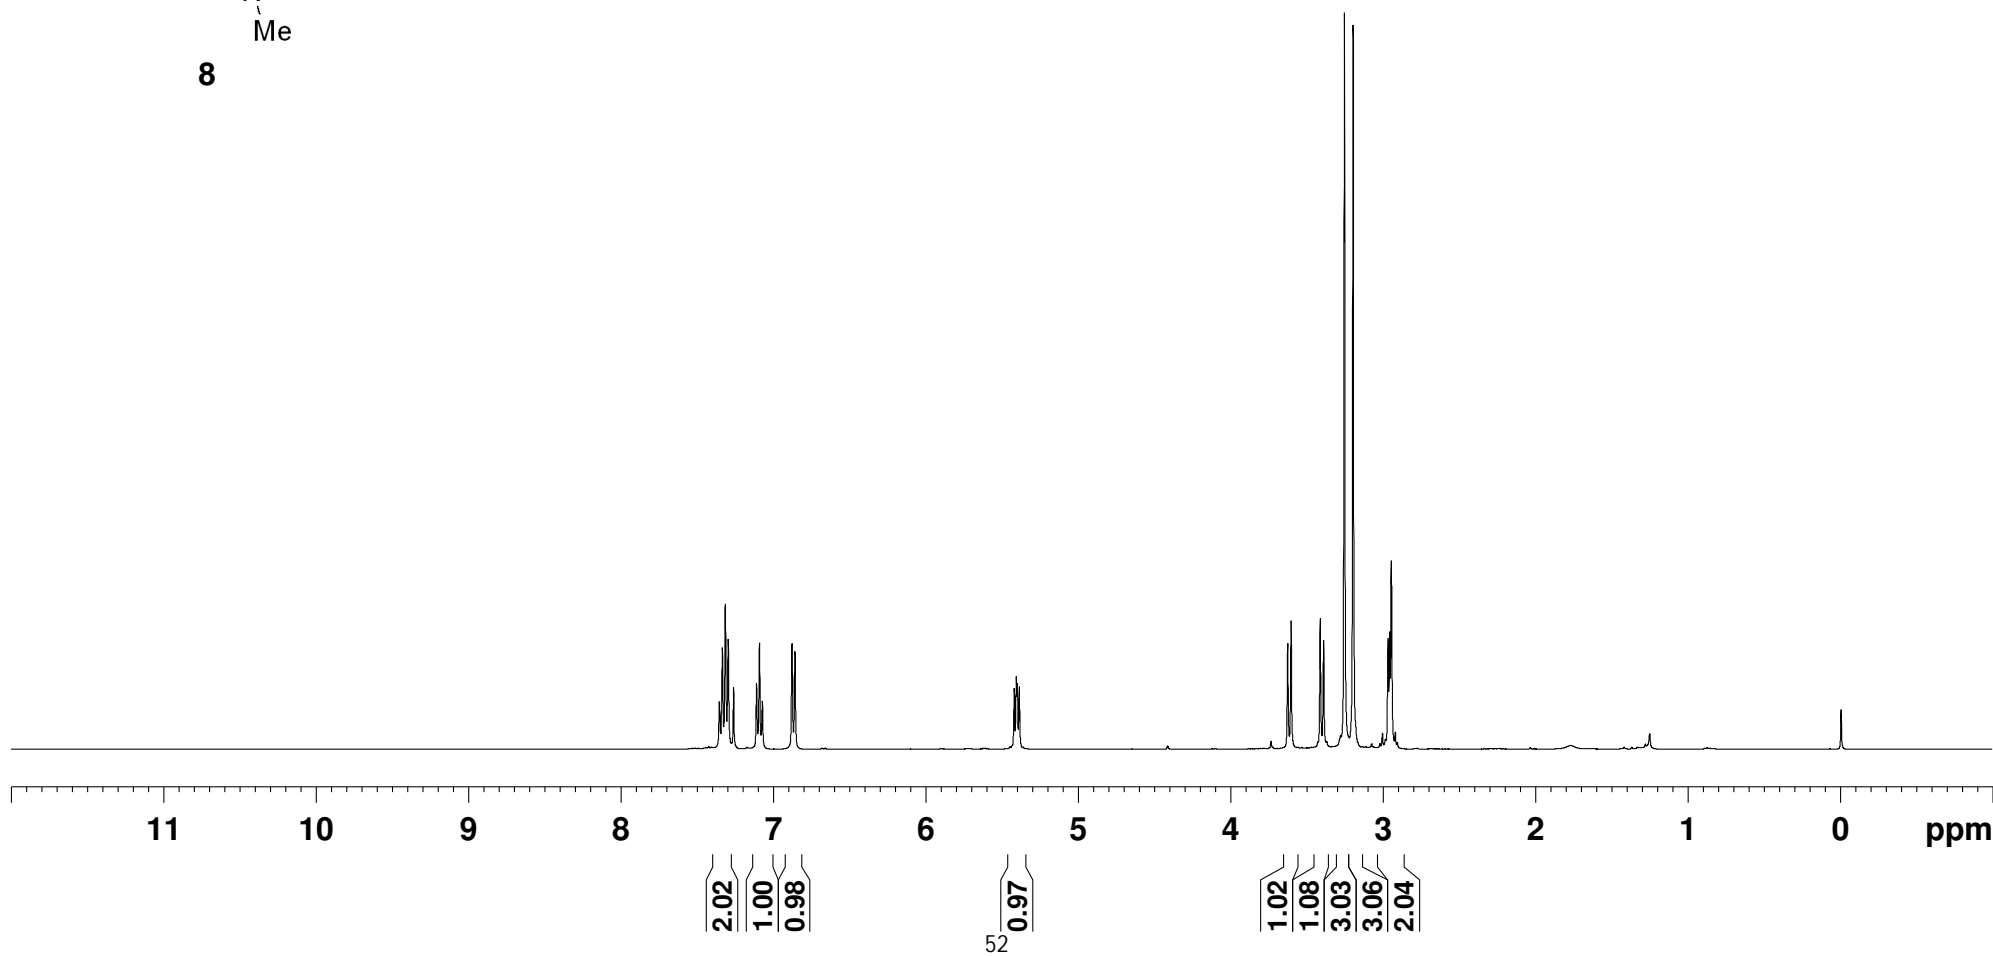

NAME CC-G161-2  
SOLVENT CDCl3  
SF 100.6178048 MHz

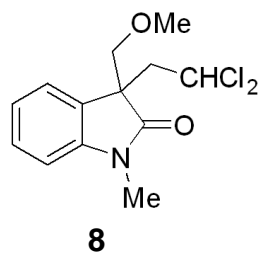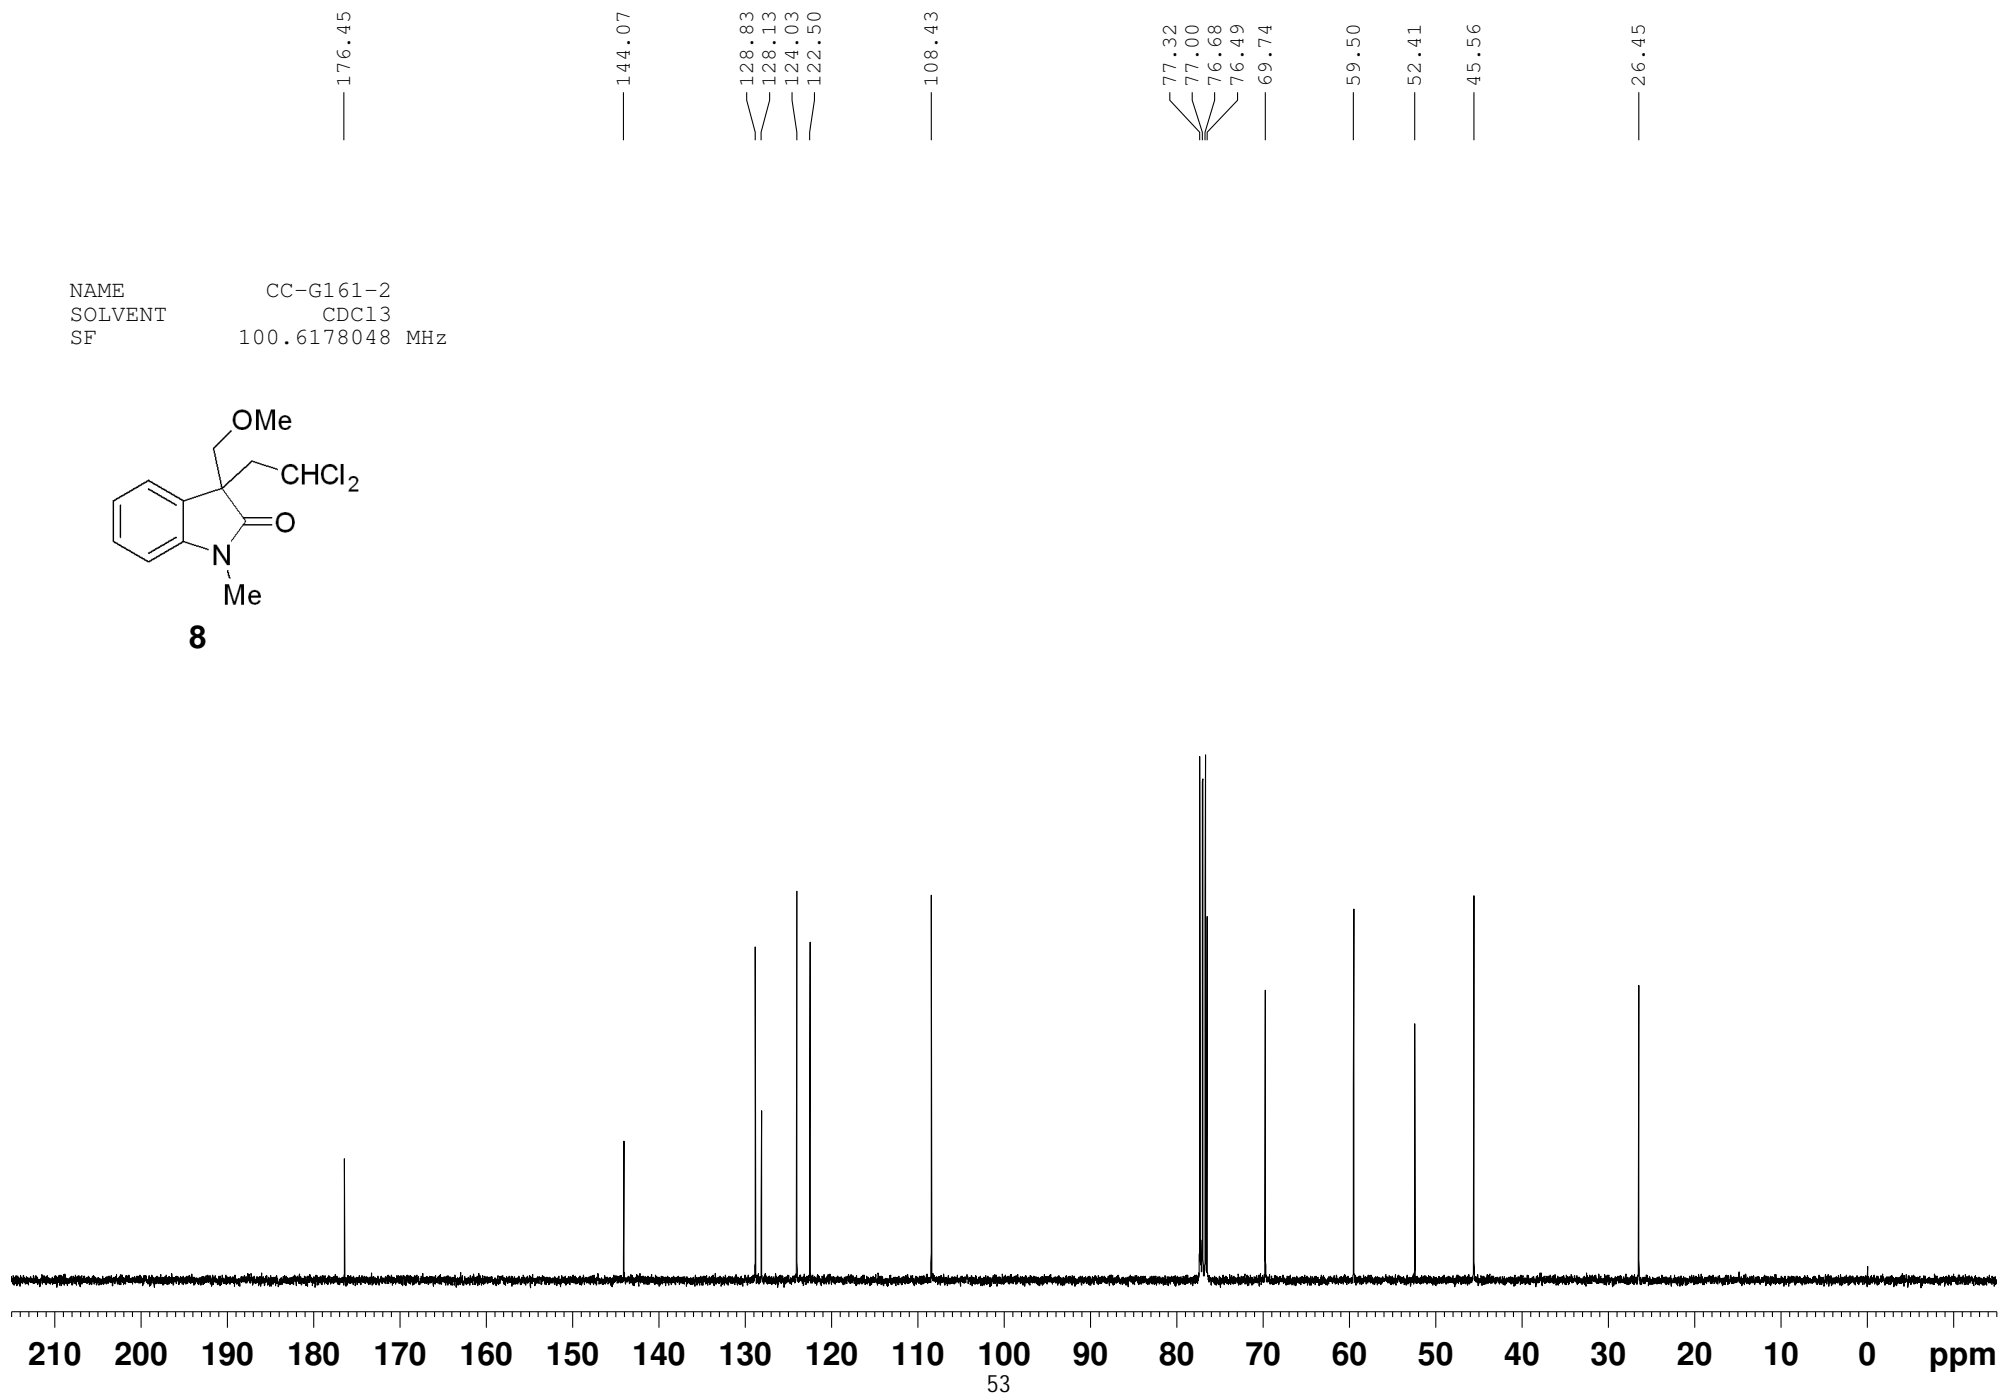

NAME cc-G141-10-H  
SOLVENT CDC13  
SF 400.1500095 MHz

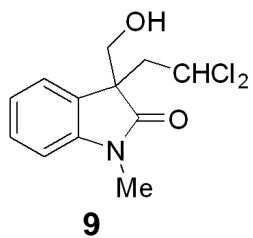

7.382  
7.379  
7.362  
7.359  
7.343  
7.340  
7.260  
7.254  
7.253  
7.236  
7.234  
7.143  
7.141  
7.124  
7.122  
7.105  
7.103  
6.911  
6.892  
5.447  
5.437  
5.424  
5.413  
3.767  
3.740  
3.699  
3.672  
3.208  
3.190  
3.166  
3.152  
3.129  
2.878  
2.867  
2.841  
2.830  
2.673

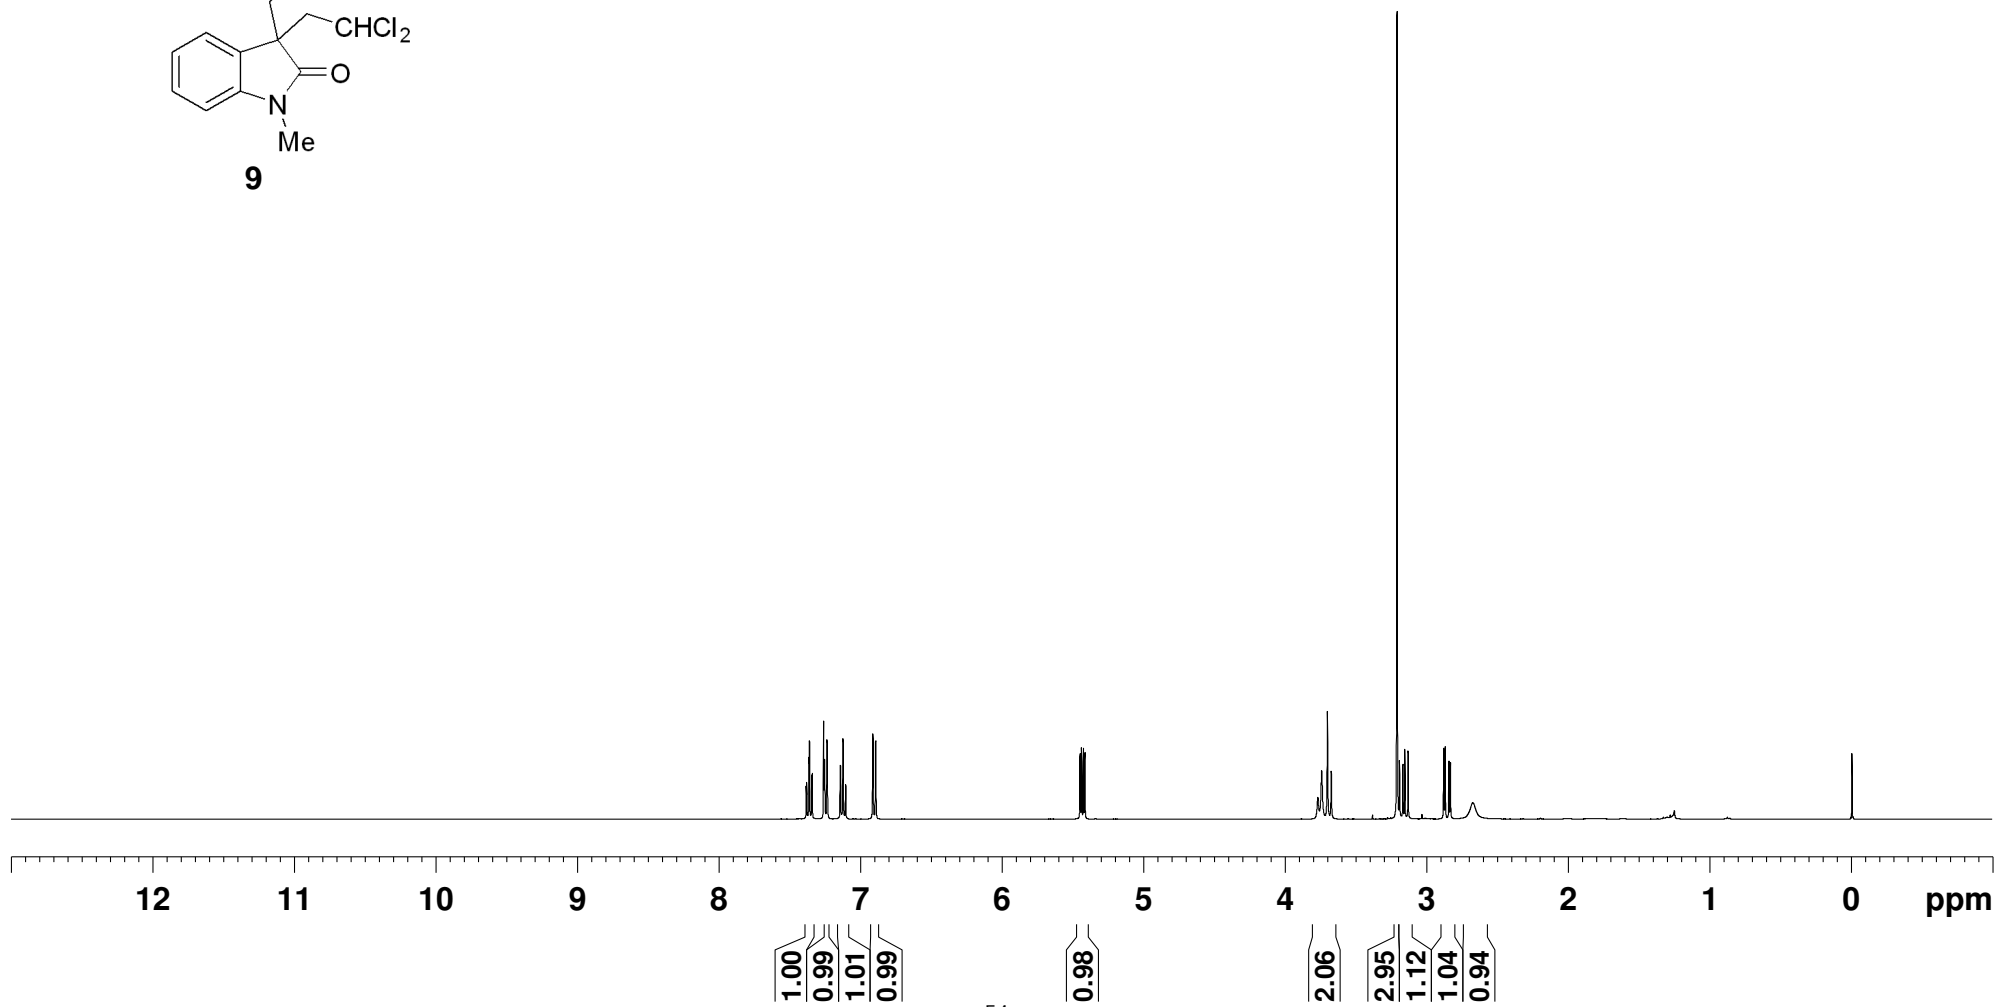

NAME cc-g141-10  
SOLVENT CDCl3  
SF 100.6178037 MHz

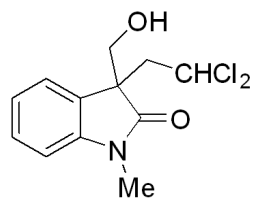

9

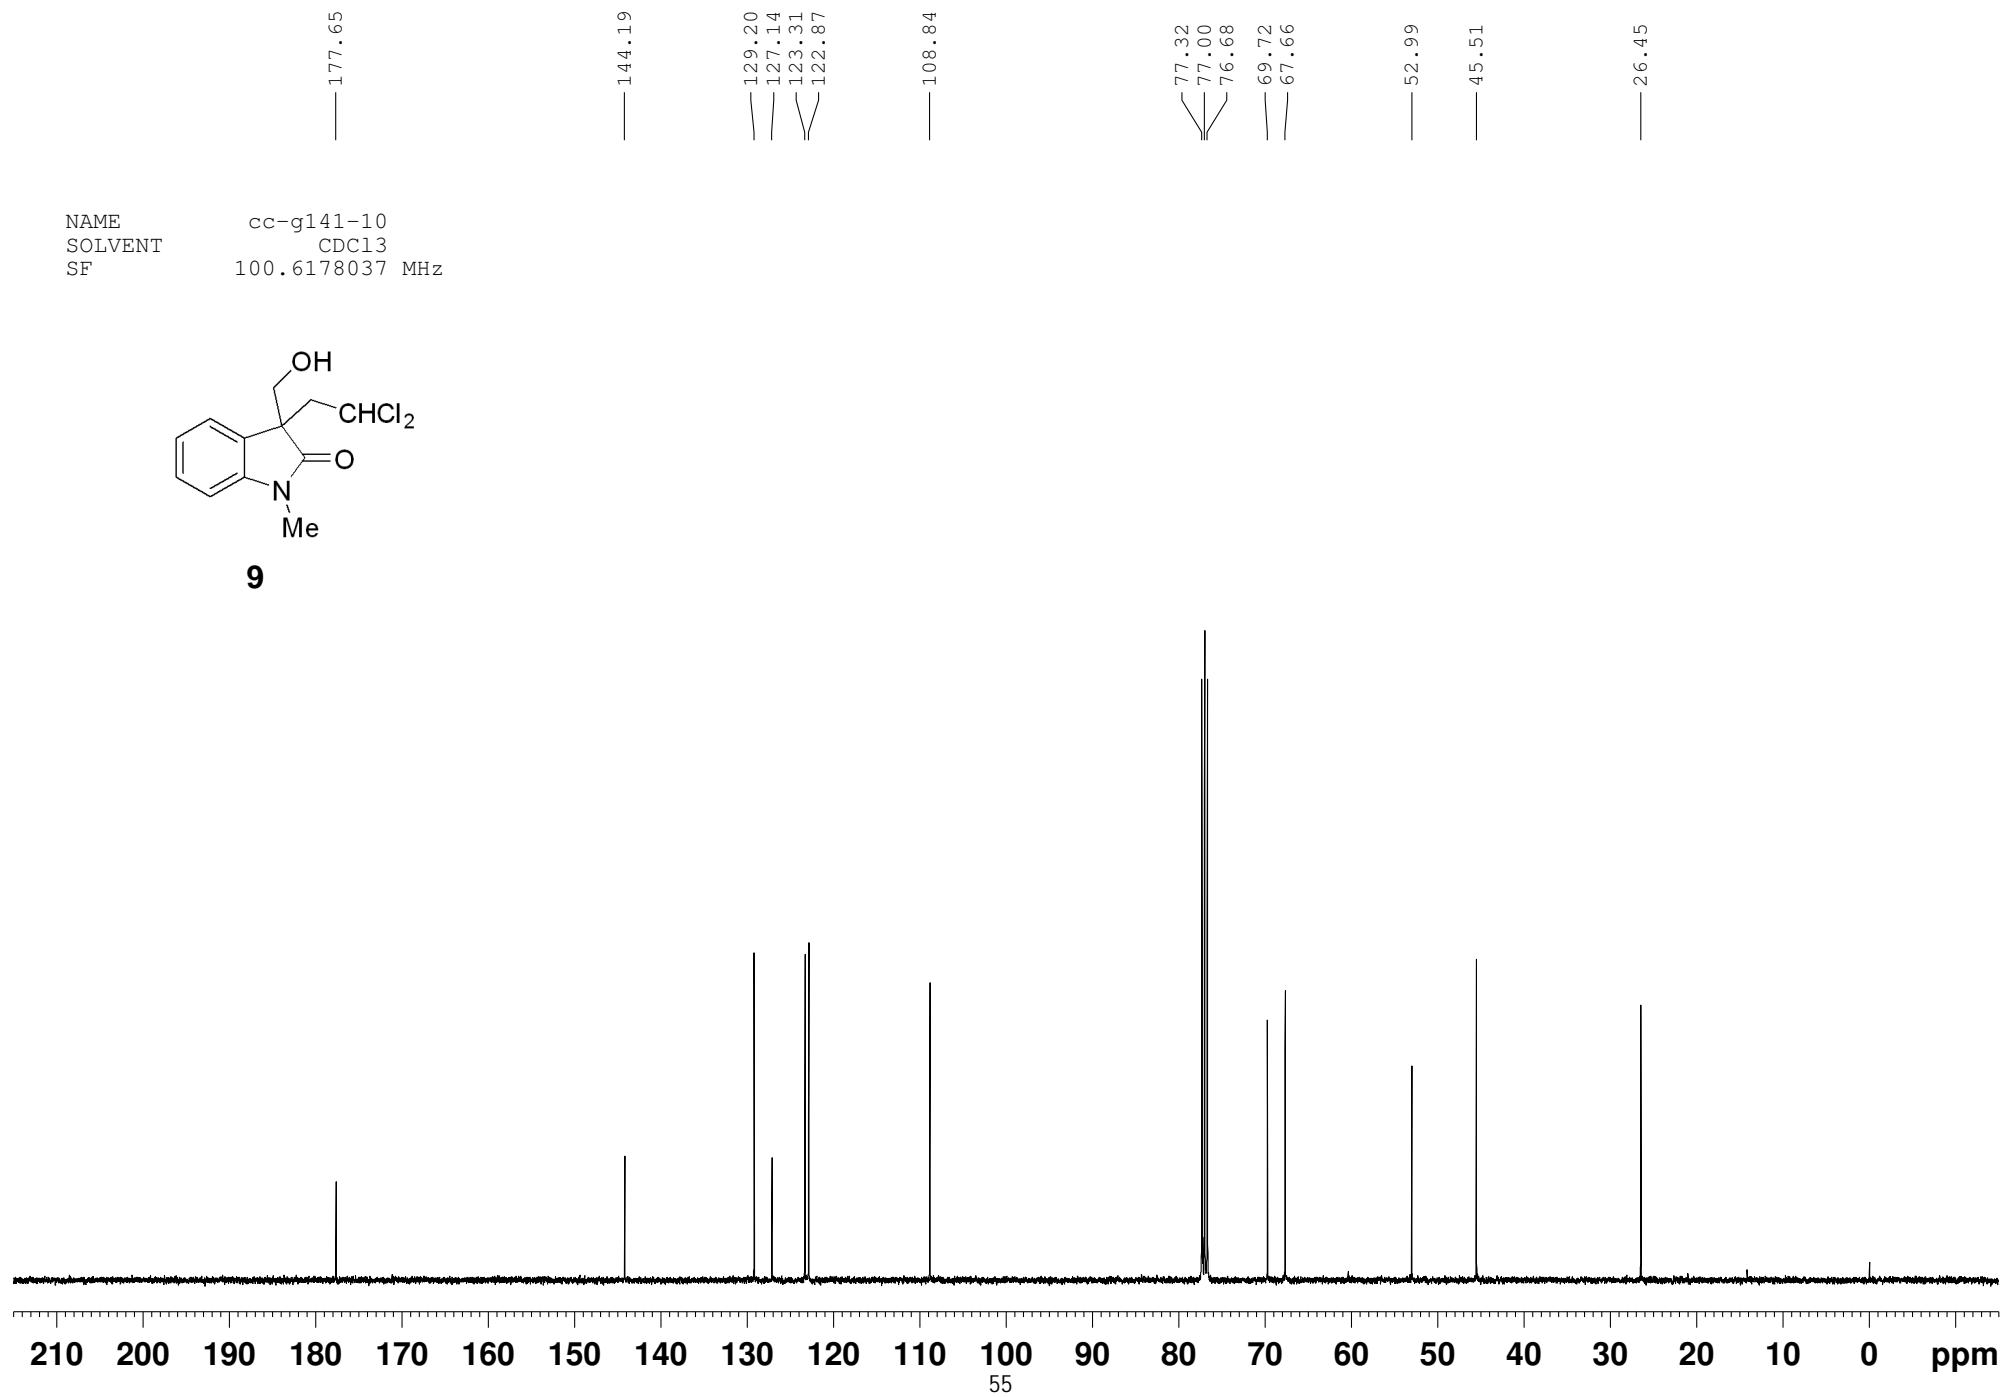

NAME cc-G148-1-1223  
SOLVENT CDCl3  
SF 400.1500099 MHz

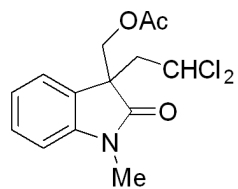

10

7.377  
7.374  
7.357  
7.355  
7.338  
7.335  
7.260  
7.253  
7.252  
7.235  
7.118  
7.116  
7.099  
7.098  
7.081  
7.079  
6.896  
6.876  
5.456  
5.445  
5.433  
5.422  
4.421  
4.394  
4.104  
4.077  
3.216  
3.064  
3.041  
3.027  
3.004  
2.869  
2.858  
2.832  
2.821  
1.938

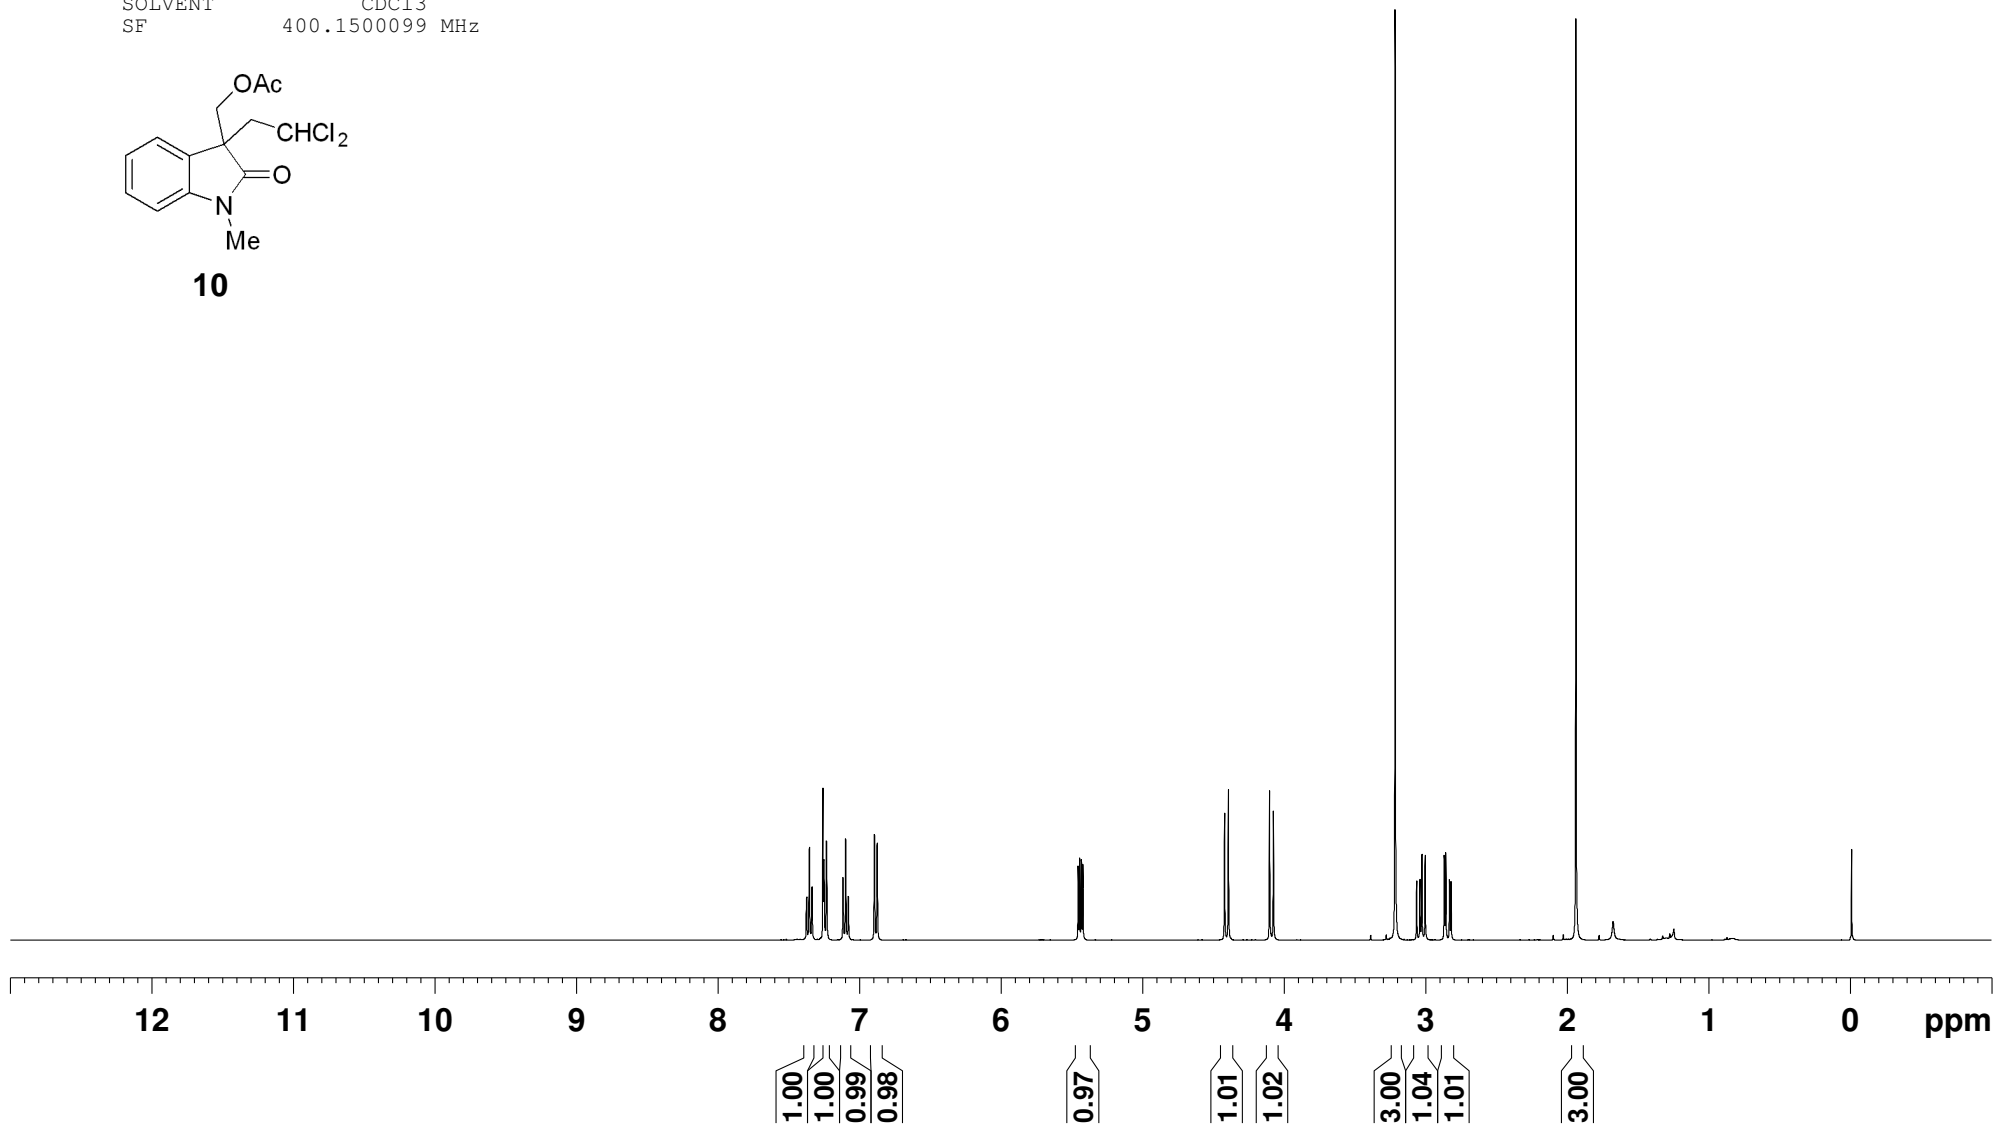



NAME cc-G148-1-1223  
SOLVENT CDCl3  
SF 100.6178023 MHz

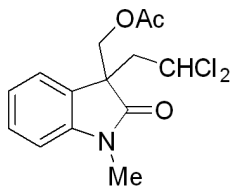

10

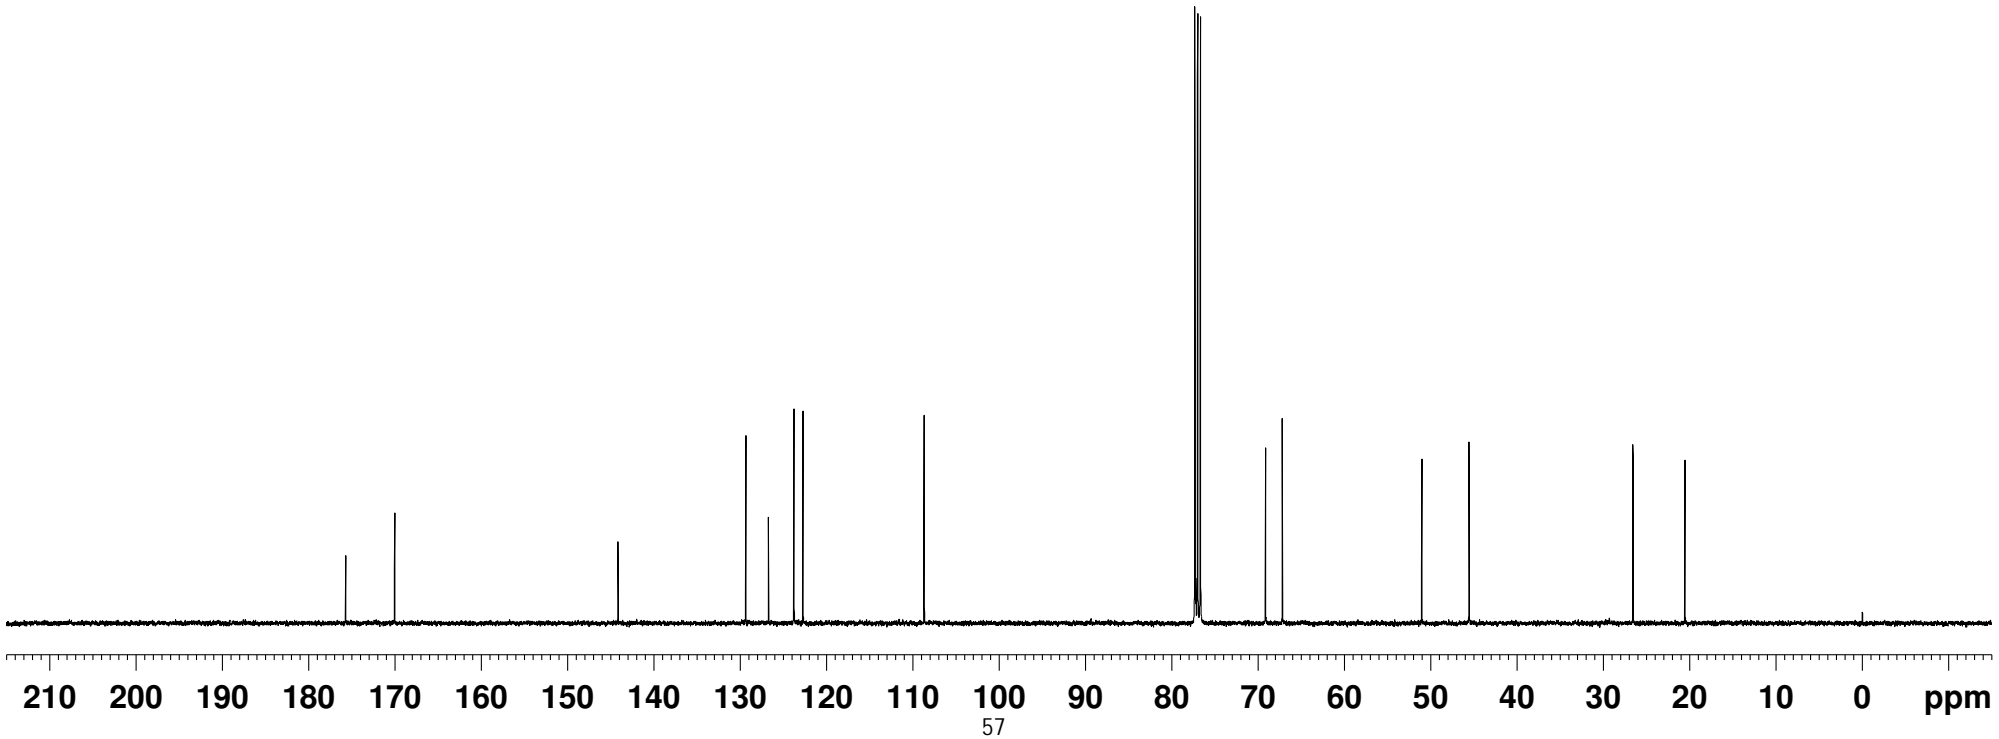

NAME cc-h80-0419  
SOLVENT CDCl3  
SF 400.1500099 MHz

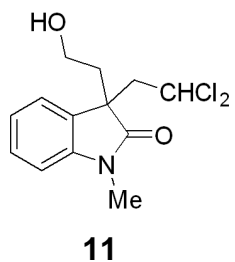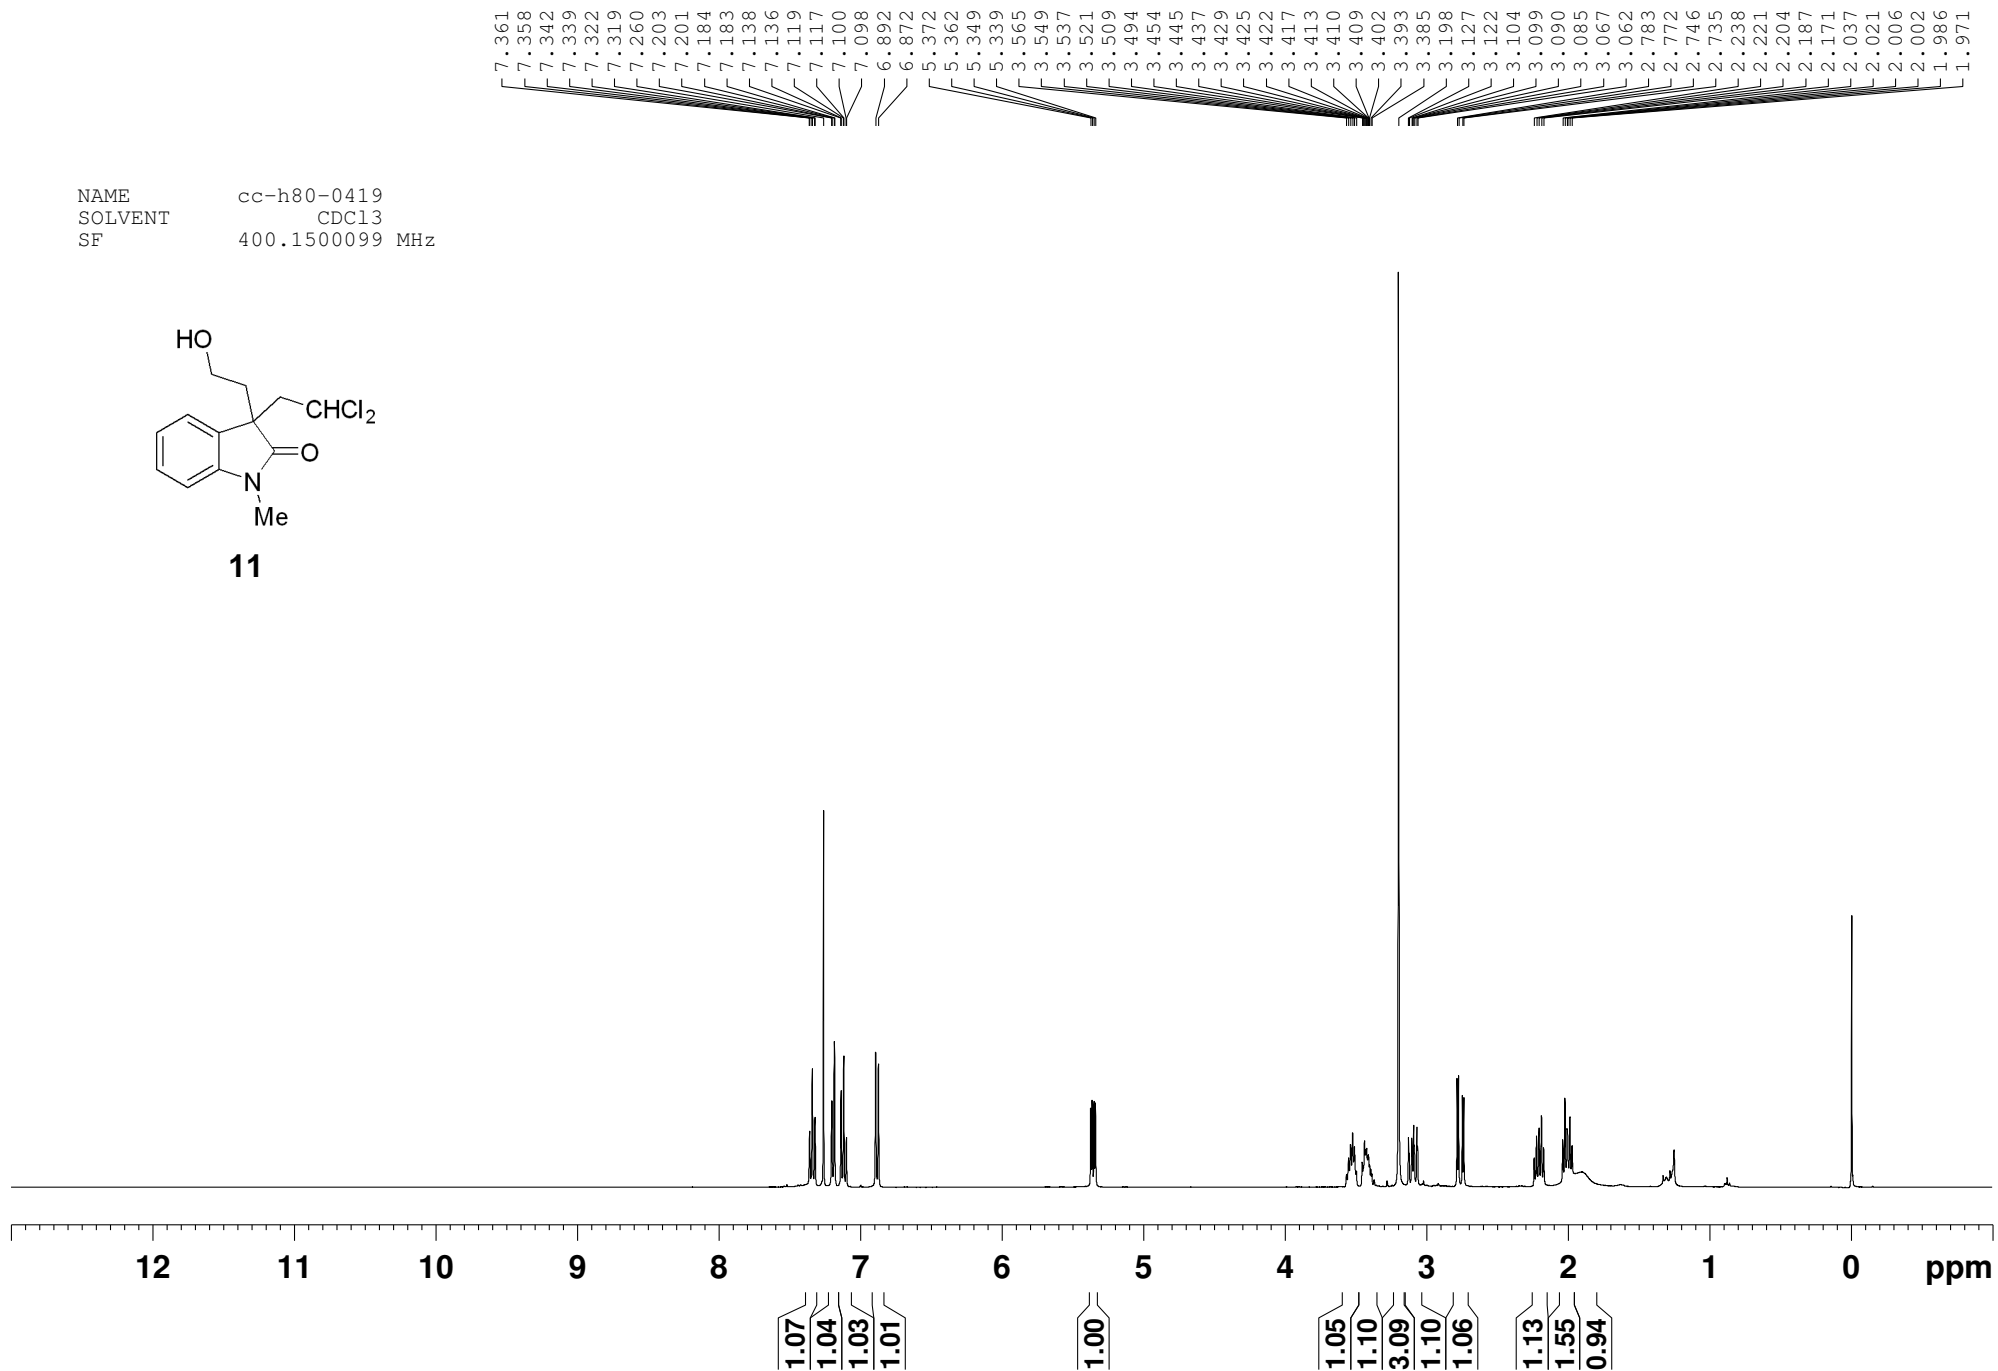

— 178.86  
— 143.86  
— 128.95  
— 122.98  
— 122.87  
— 108.77  
77.32  
77.00  
76.68  
— 69.30  
— 58.40  
49.90  
49.69  
— 41.18  
— 26.52

NAME CC-H80-0416  
SOLVENT CDCl3  
SF 100.6178037 MHz

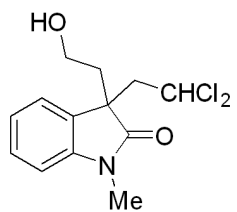

**11**

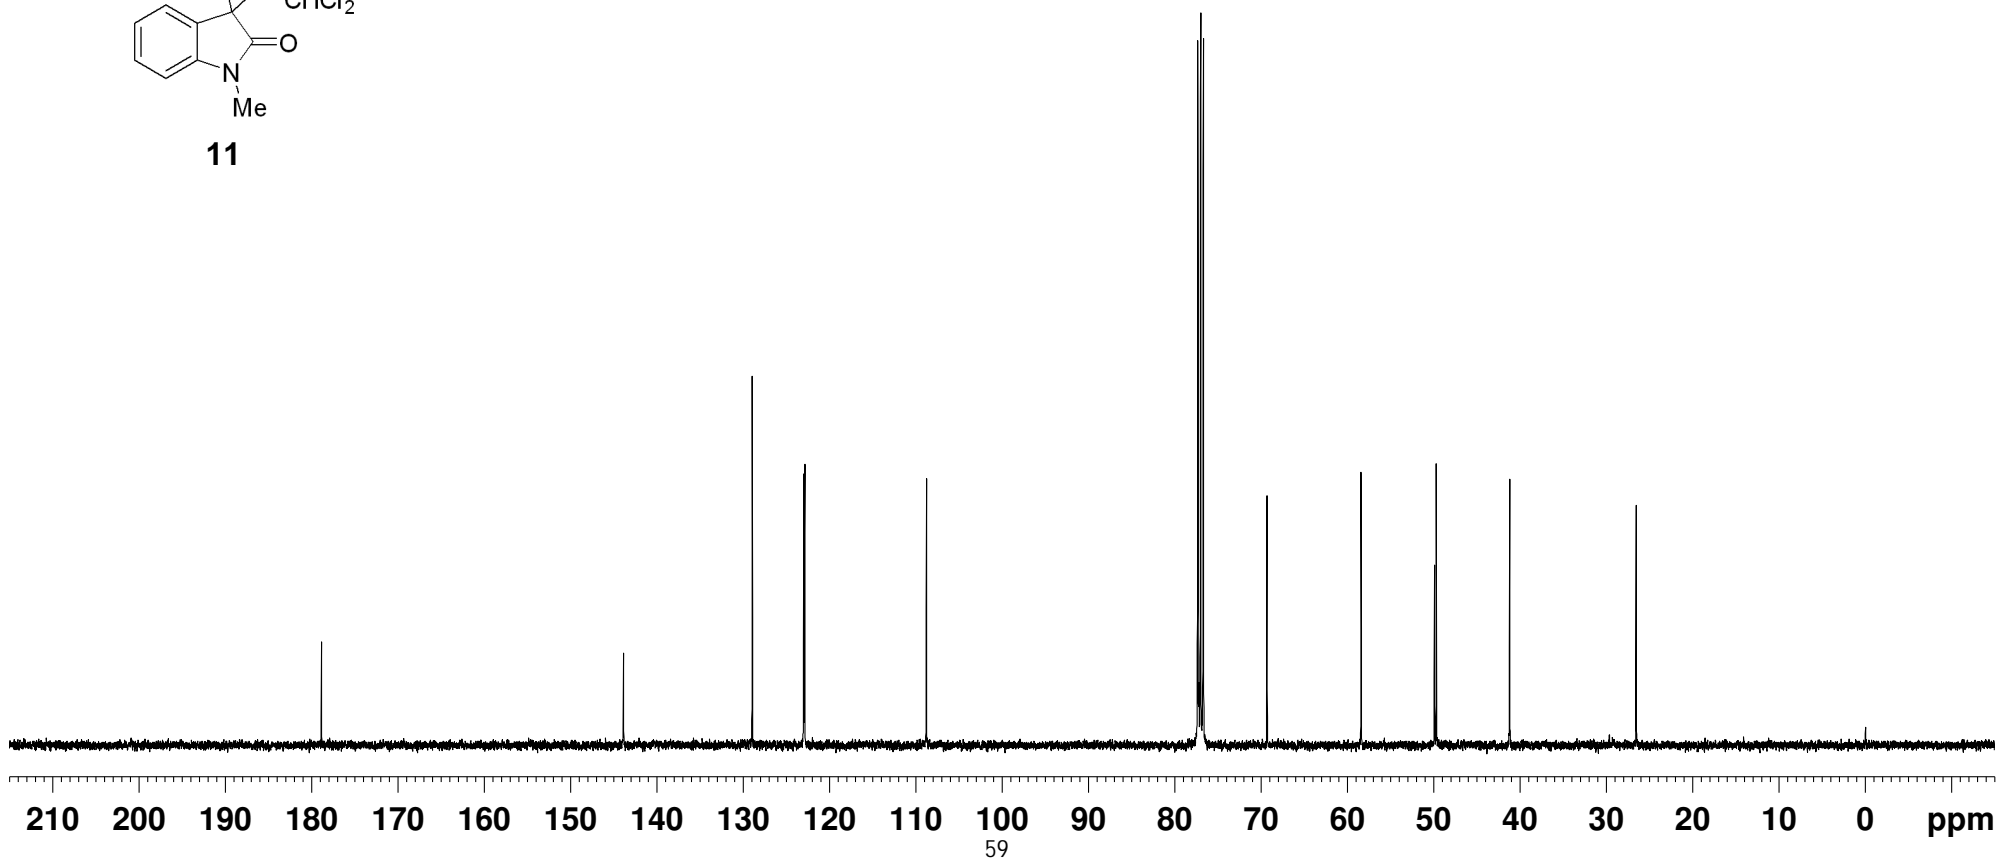

NAME cc-G148-2-1225  
SOLVENT CDC13  
SF 400.1500099 MHz

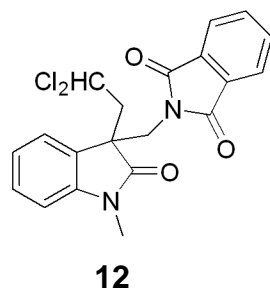

7.814  
7.807  
7.801  
7.793  
7.708  
7.701  
7.695  
7.687  
7.315  
7.312  
7.295  
7.293  
7.276  
7.273  
7.260  
7.198  
7.196  
7.179  
7.047  
7.045  
7.028  
7.026  
7.010  
7.008  
6.849  
5.429  
5.417  
5.407  
5.395  
4.031  
3.996  
3.956  
3.921  
3.217  
3.202  
3.196  
3.180  
3.158  
3.063  
3.051  
3.026  
3.014

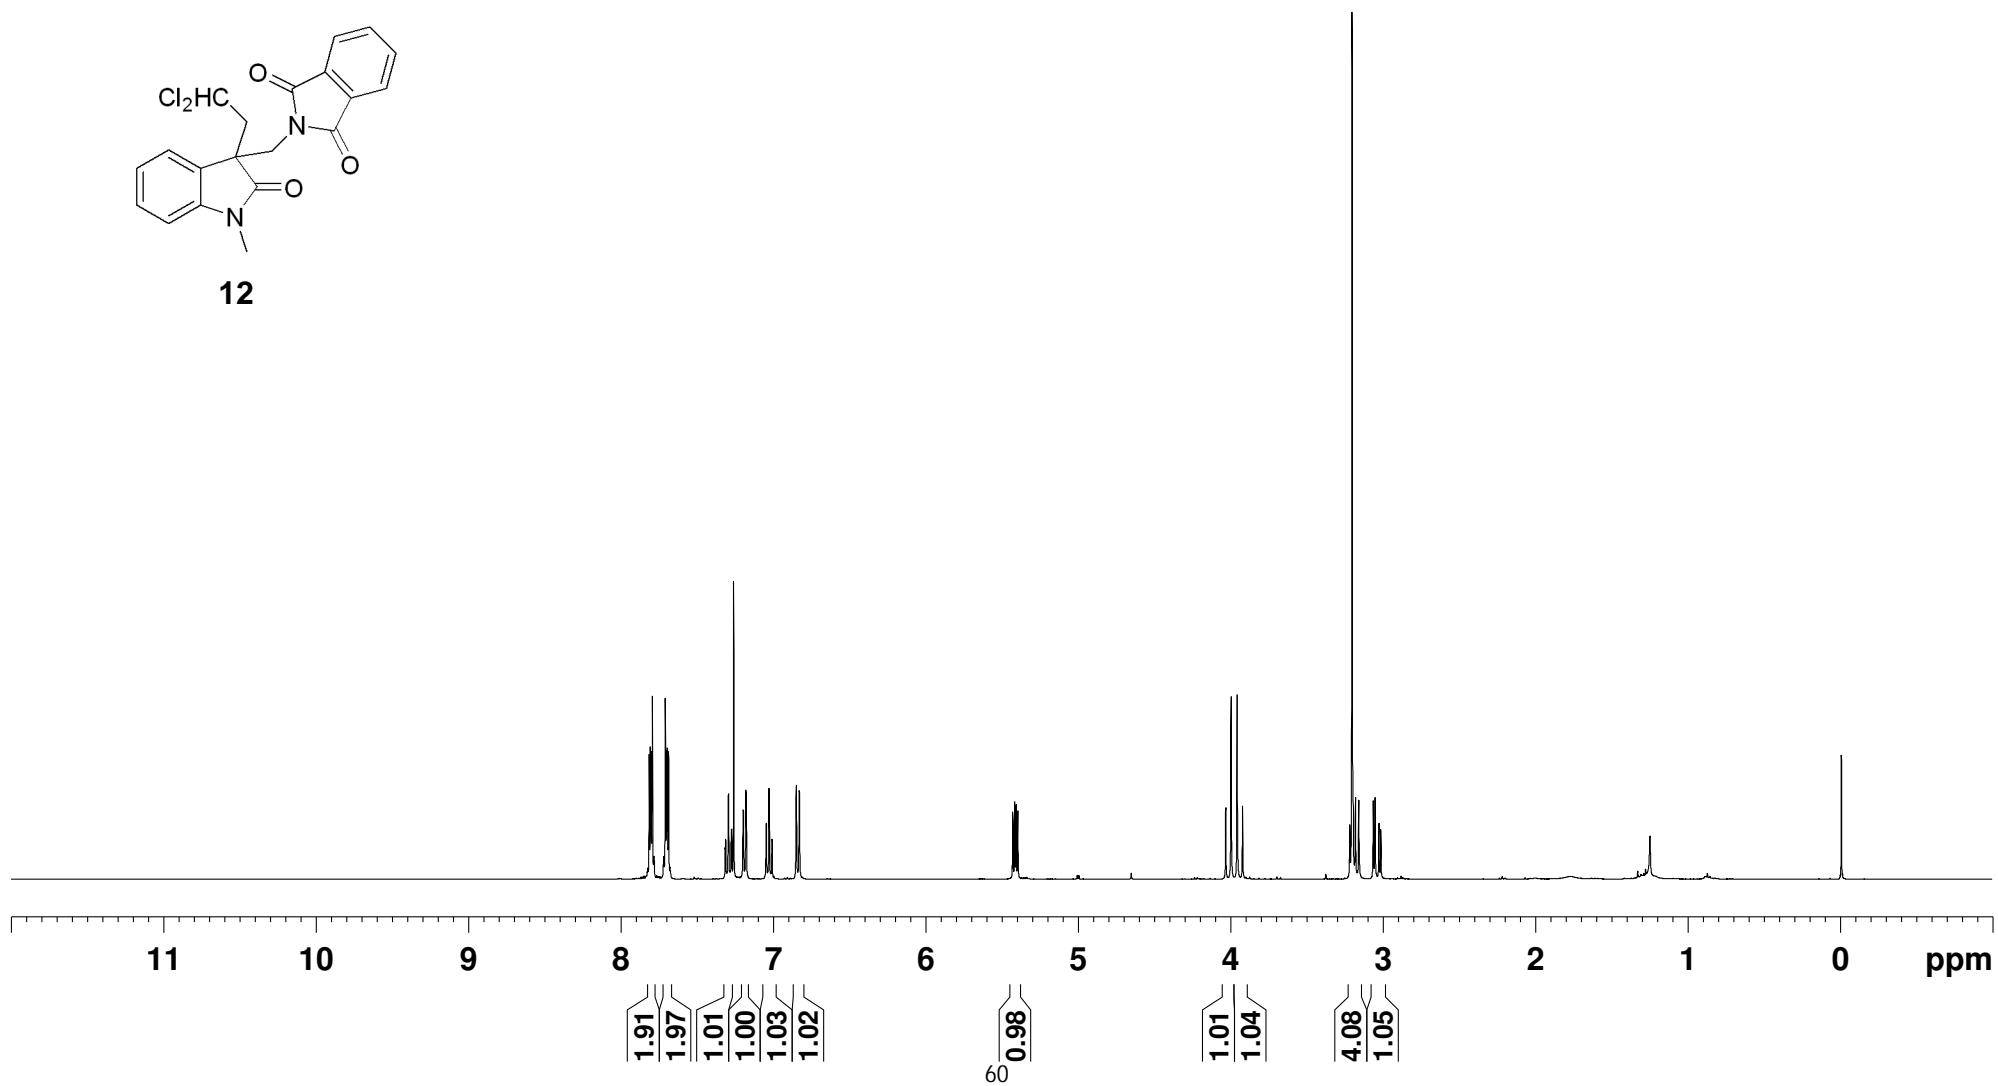

NAME cc-G148-2-1225  
SOLVENT CDCl3  
SF 100.6178030 MHz

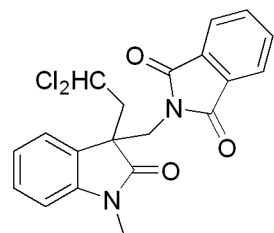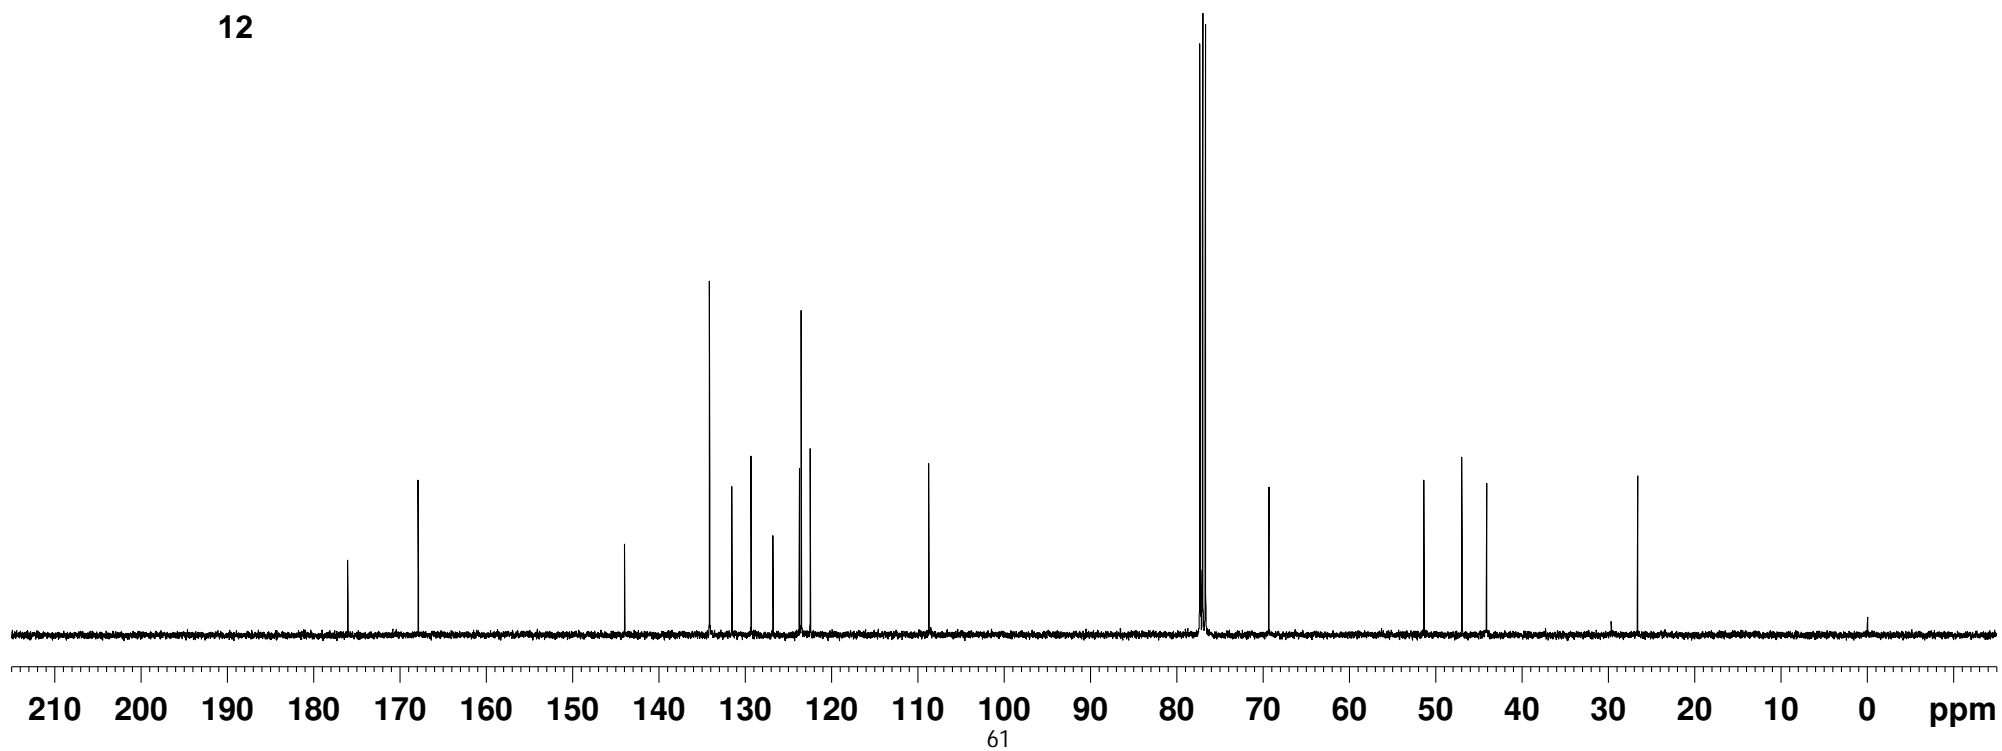

7.361  
7.358  
7.342  
7.339  
7.322  
7.319  
7.277  
7.276  
7.271  
7.259  
7.103  
7.101  
7.084  
7.082  
7.065  
7.063  
6.896  
6.876  
5.439  
5.428  
5.418  
5.407  
3.497  
3.235  
2.999  
2.978  
2.962  
2.941  
2.925  
2.914  
2.902  
2.889  
2.877

NAME cc-G148-4-1225  
SOLVENT CDCl3  
SF 400.1500057 MHz

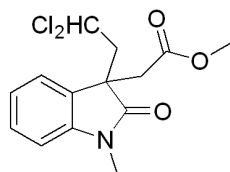

**13**

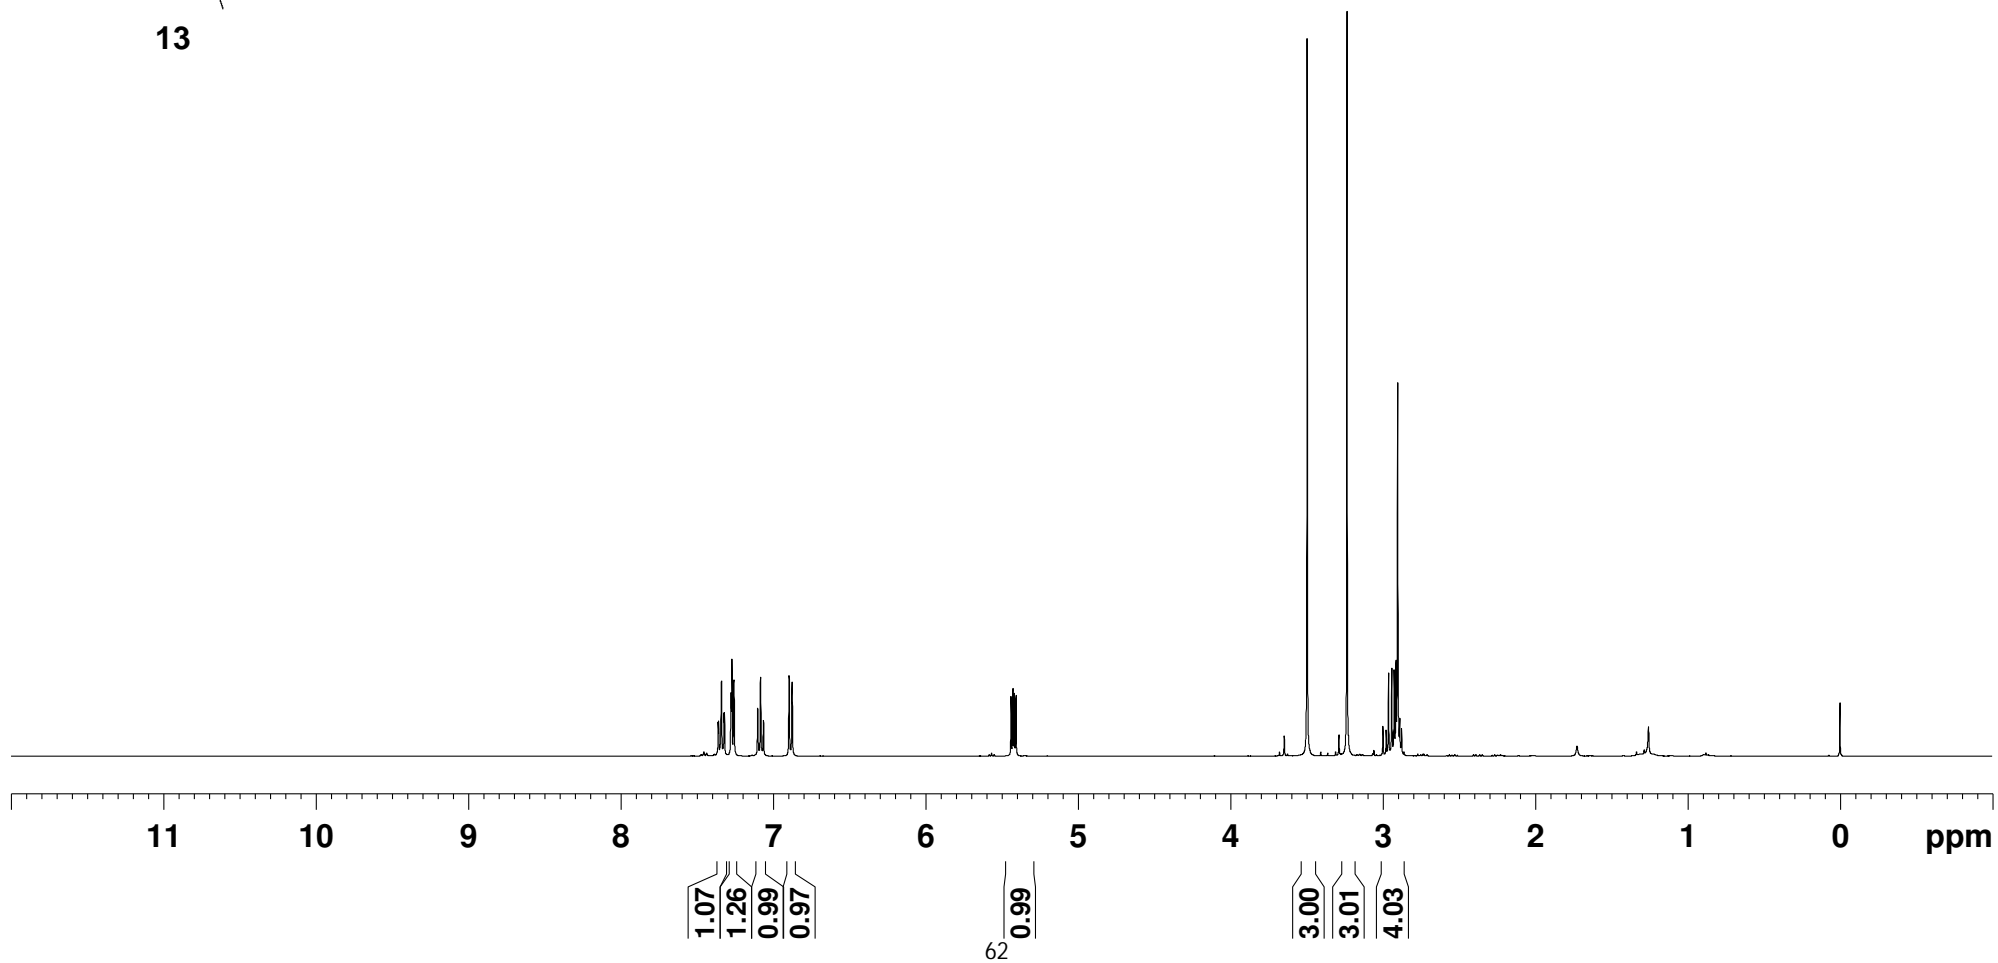

— 177.40

— 169.54

— 144.34

— 129.19

— 128.25

— 123.31

— 122.63

— 108.62

— 77.32

— 77.00

— 76.68

— 68.94

— 51.73

— 49.04

— 48.45

— 41.38

— 26.56

NAME cc-G148-4-1223  
SOLVENT CDCl3  
SF 100.6178023 MHz

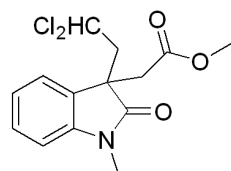

**13**

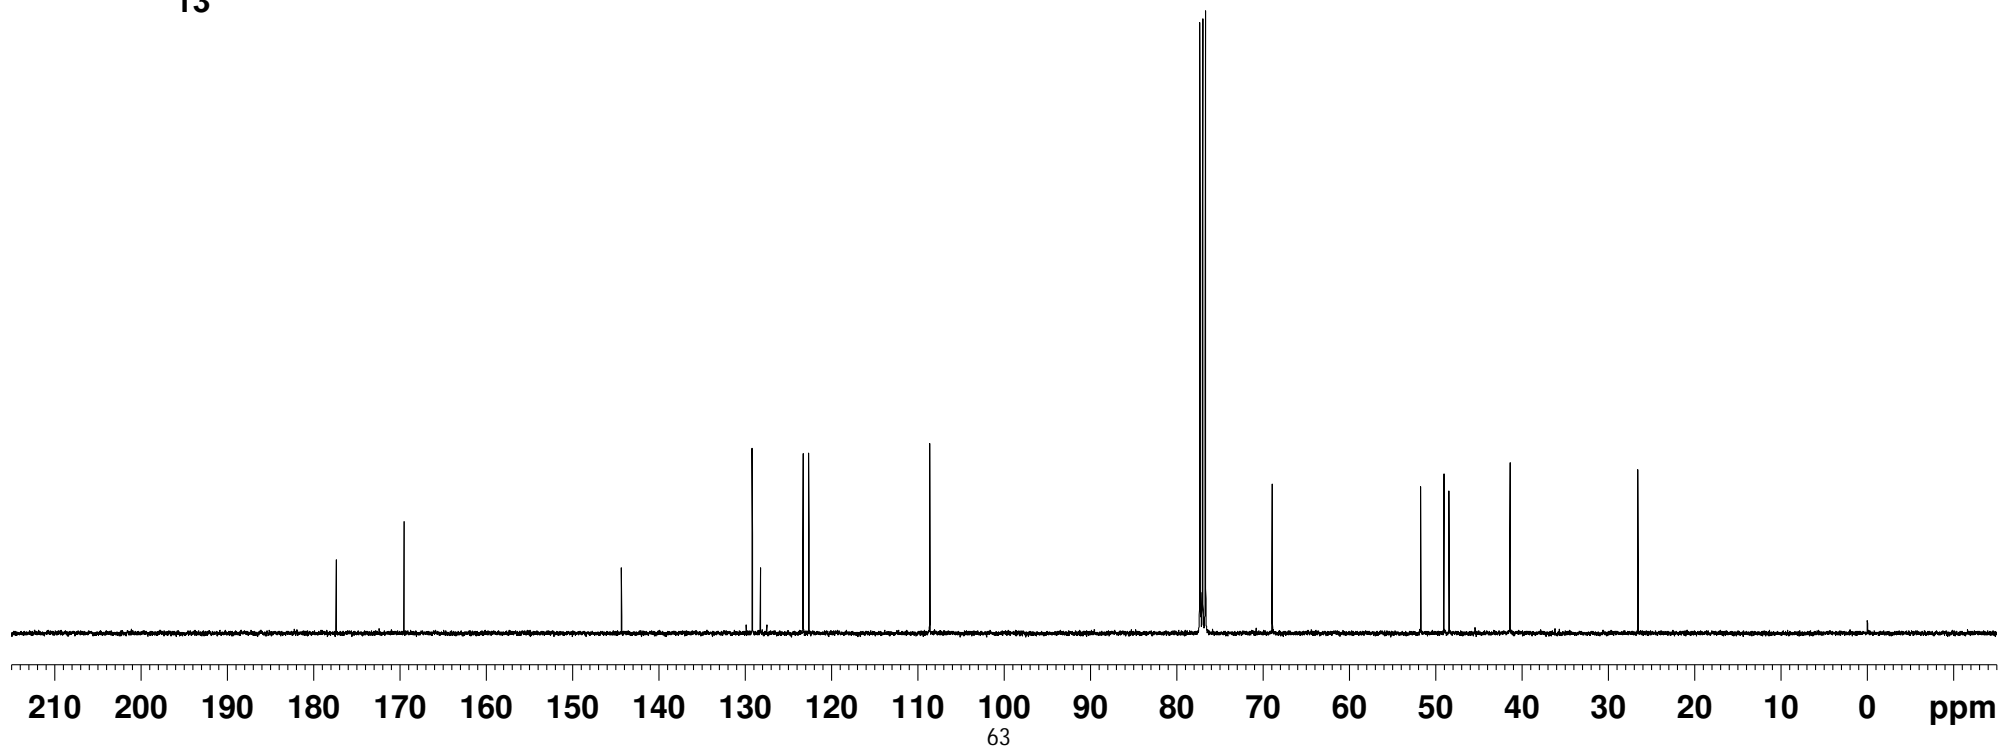

7.324  
7.318  
7.307  
7.304  
7.302  
7.299  
7.288  
7.282  
7.244  
7.226  
7.223  
7.209  
7.190  
7.152  
7.139  
7.134  
7.128  
7.116  
7.112  
7.097  
7.094  
7.080  
7.078  
7.061  
7.059  
7.021  
7.003  
6.845  
6.826  
5.353  
5.343  
5.329  
5.319  
3.175  
3.030  
3.007  
2.993  
2.970  
2.704  
2.694  
2.667  
2.657  
2.549  
2.534  
2.526  
2.514  
2.500  
2.491  
2.477  
2.450  
2.434  
2.428  
2.411  
2.399  
2.394  
2.377  
1.996  
1.984  
1.964  
1.952  
1.932  
1.921  
1.782  
1.772  
1.751  
1.740  
1.718  
1.708  
1.367  
1.361  
1.348  
1.339  
1.336  
1.328  
1.314  
1.308  
1.282  
1.129  
1.125  
1.120  
1.111  
1.103  
1.097  
1.094  
1.088  
1.081  
1.072  
1.066

NAME cc-g161-8  
SOLVENT CDC13  
SF 400.1500165 MHz

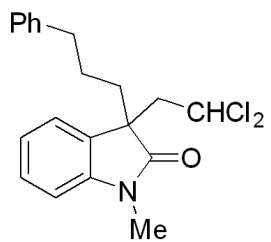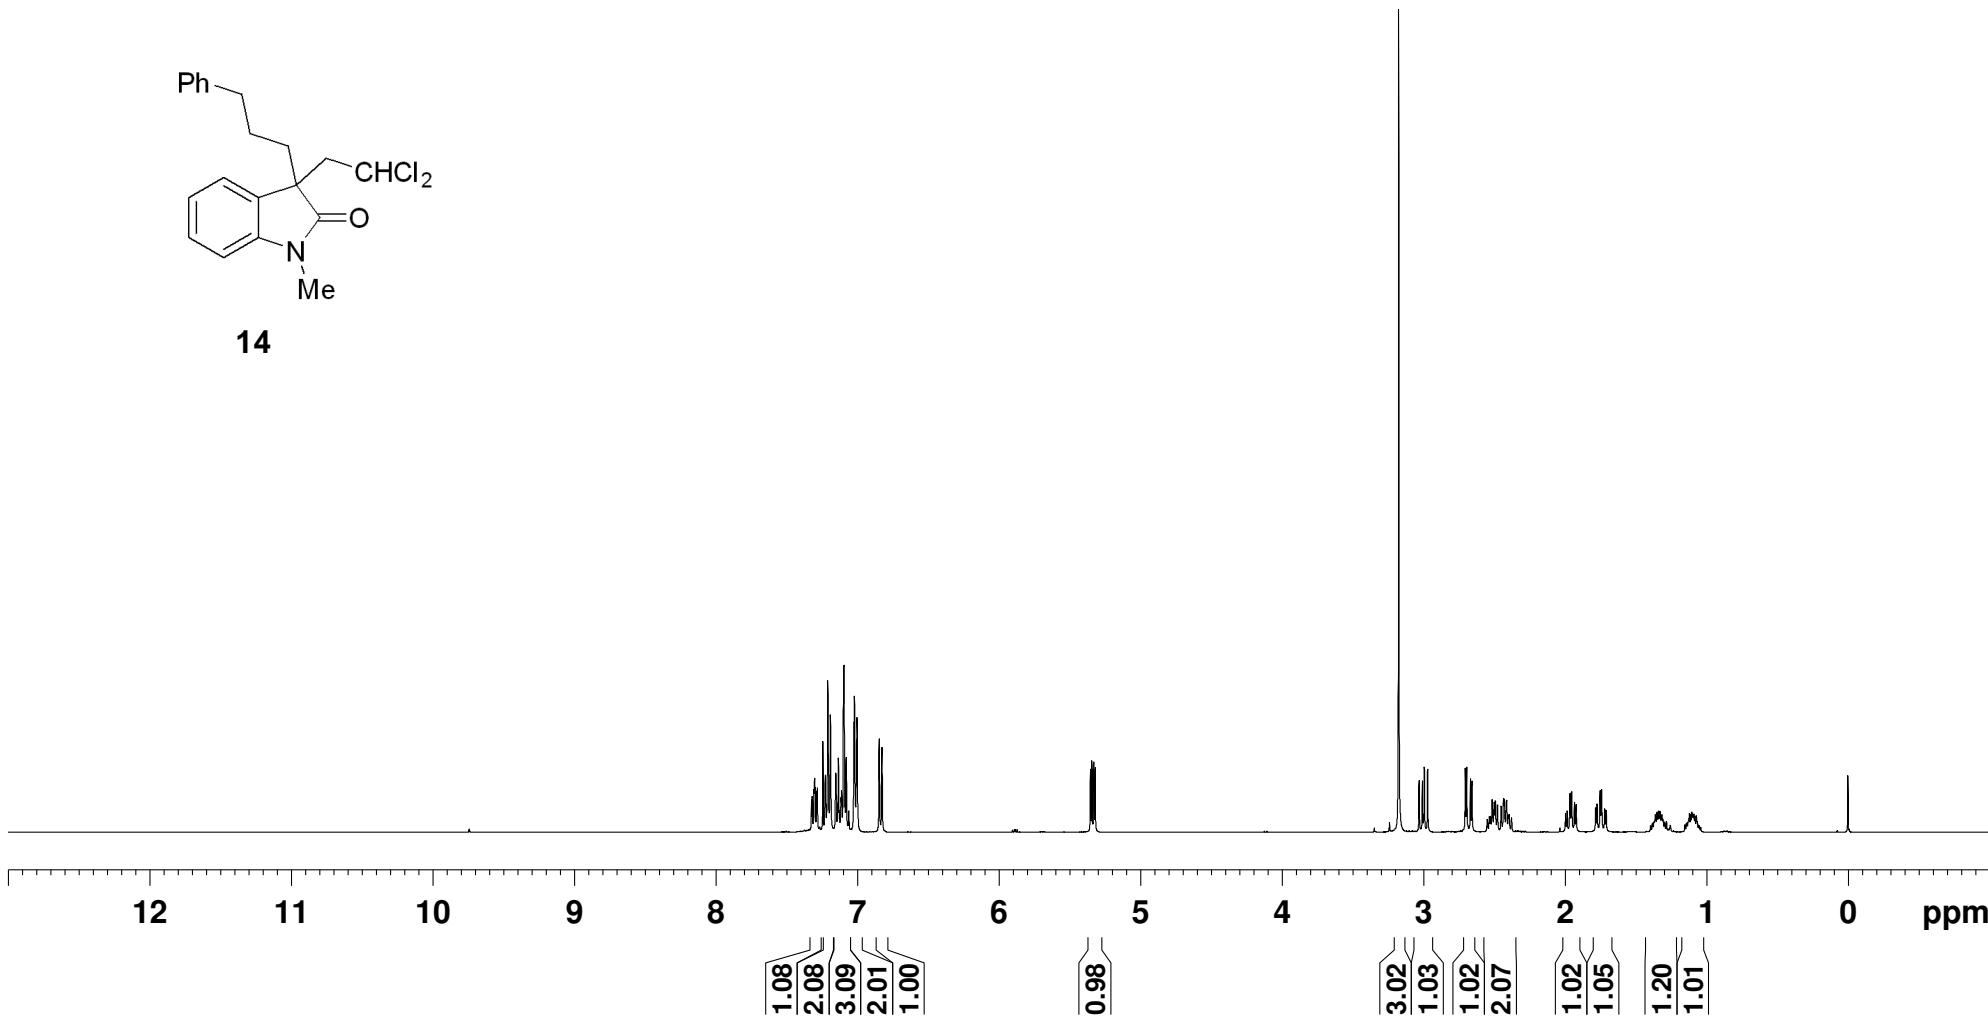



— 178.18

— 144.16  
— 141.37

— 129.07  
— 128.62  
— 128.26  
— 128.23  
— 125.81  
— 122.77  
— 122.60

— 108.43

— 77.32  
— 77.00  
— 76.68

— 69.54

— 51.35  
— 49.87

— 38.69  
— 35.59

— 26.33  
— 25.03

NAME cc-G161-8-c  
SOLVENT CDC13  
SF 100.6178074 MHz

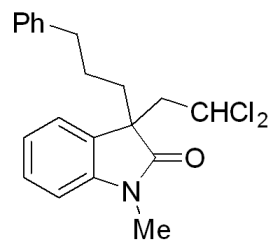

**14**

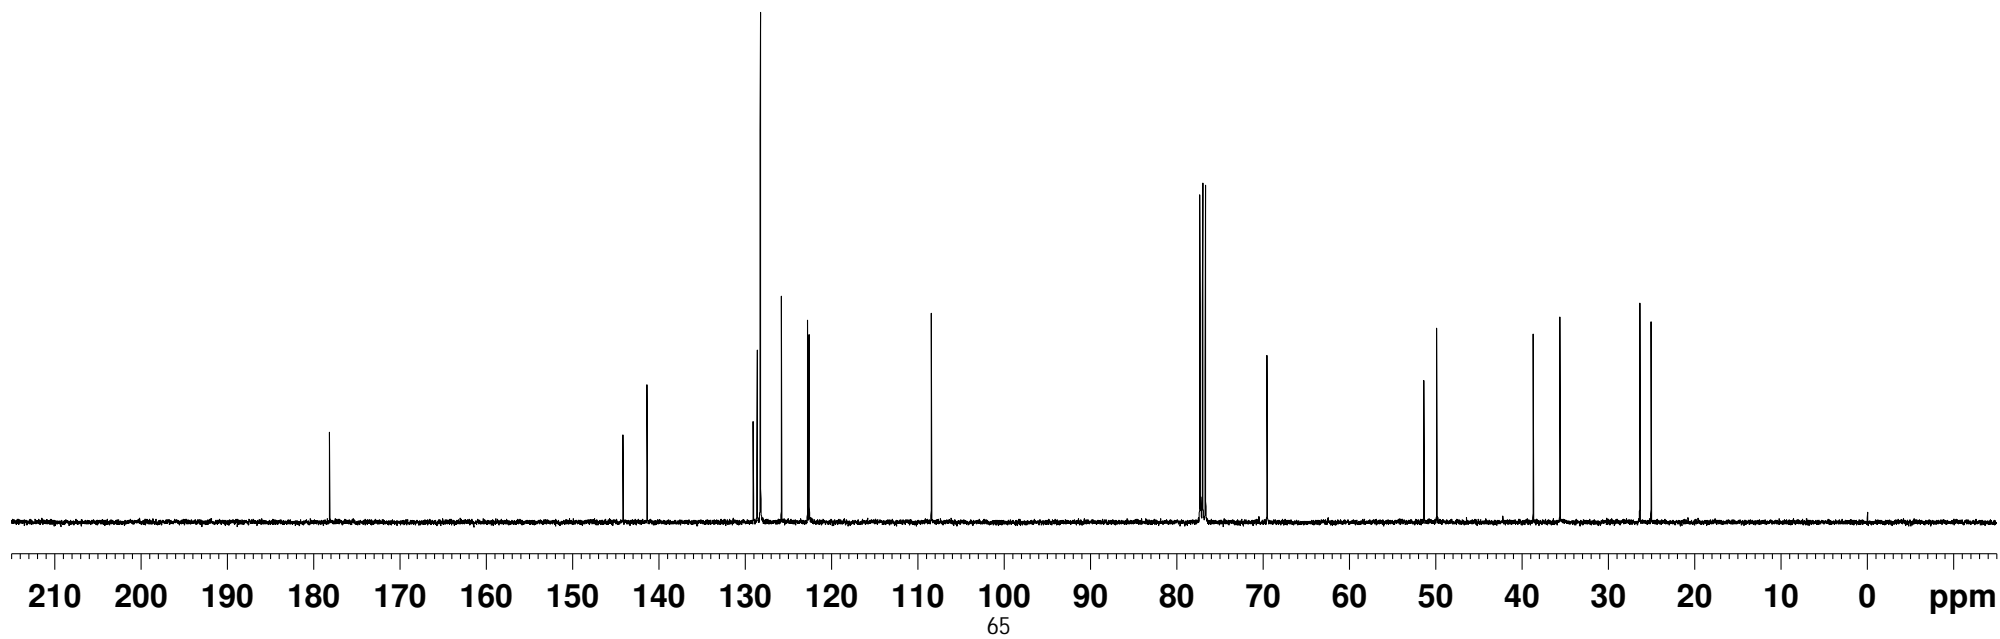

NAME CC-G161-6  
SOLVENT CDCl3  
SF 400.1500097 MHz

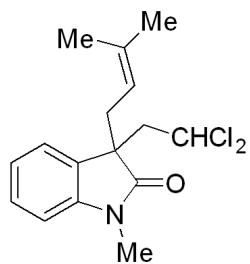

15

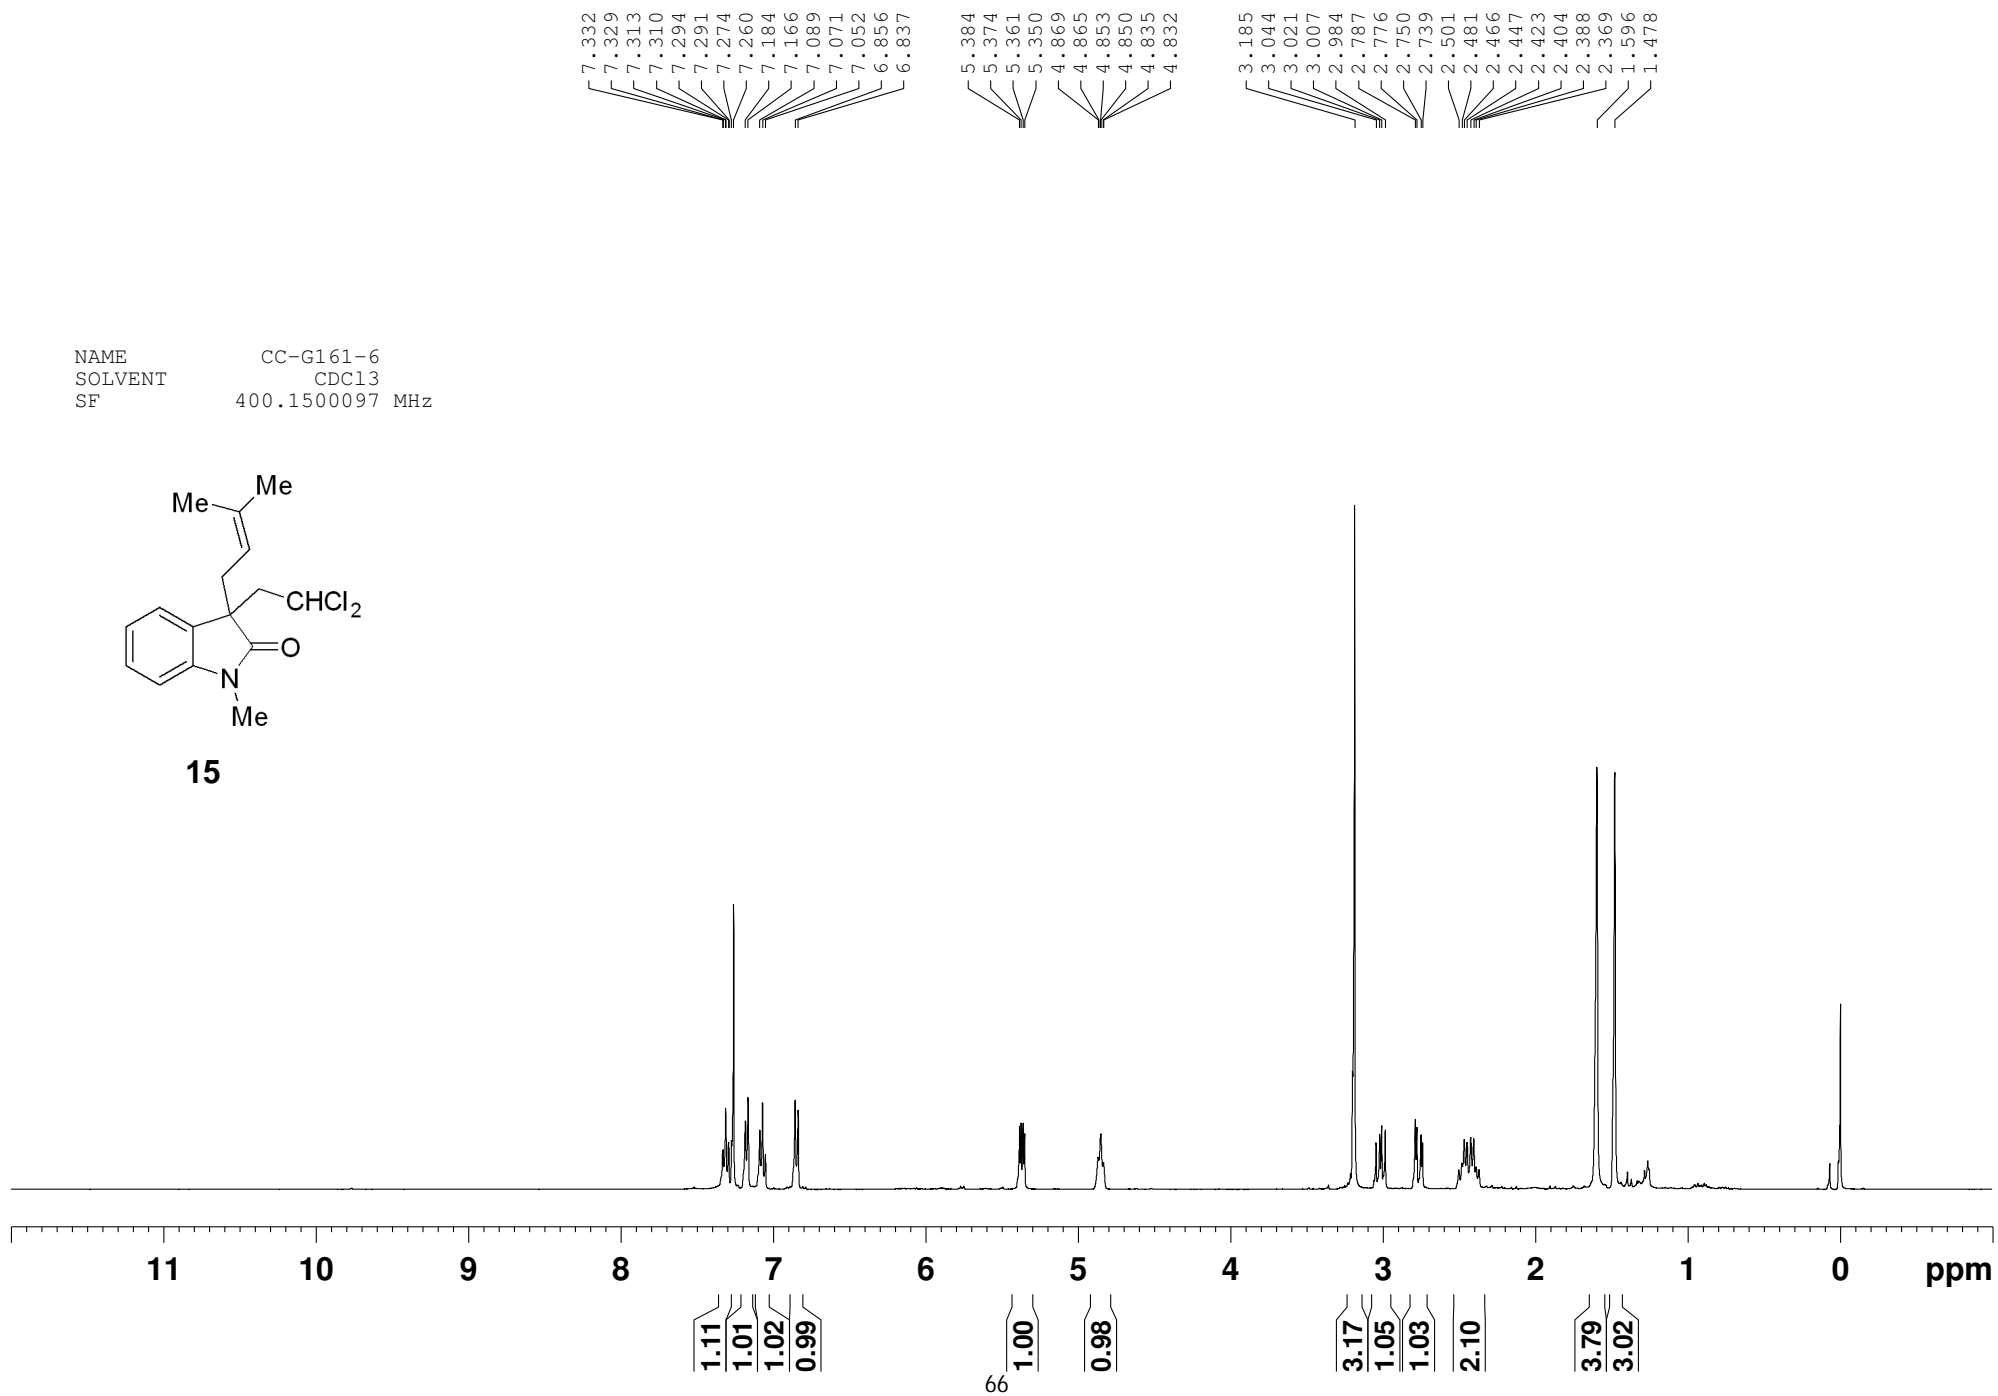

NAME CC-G161-6  
SOLVENT CDCl3  
SF 100.6178001 MHz

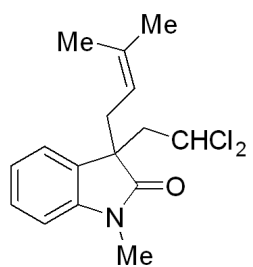

**15**

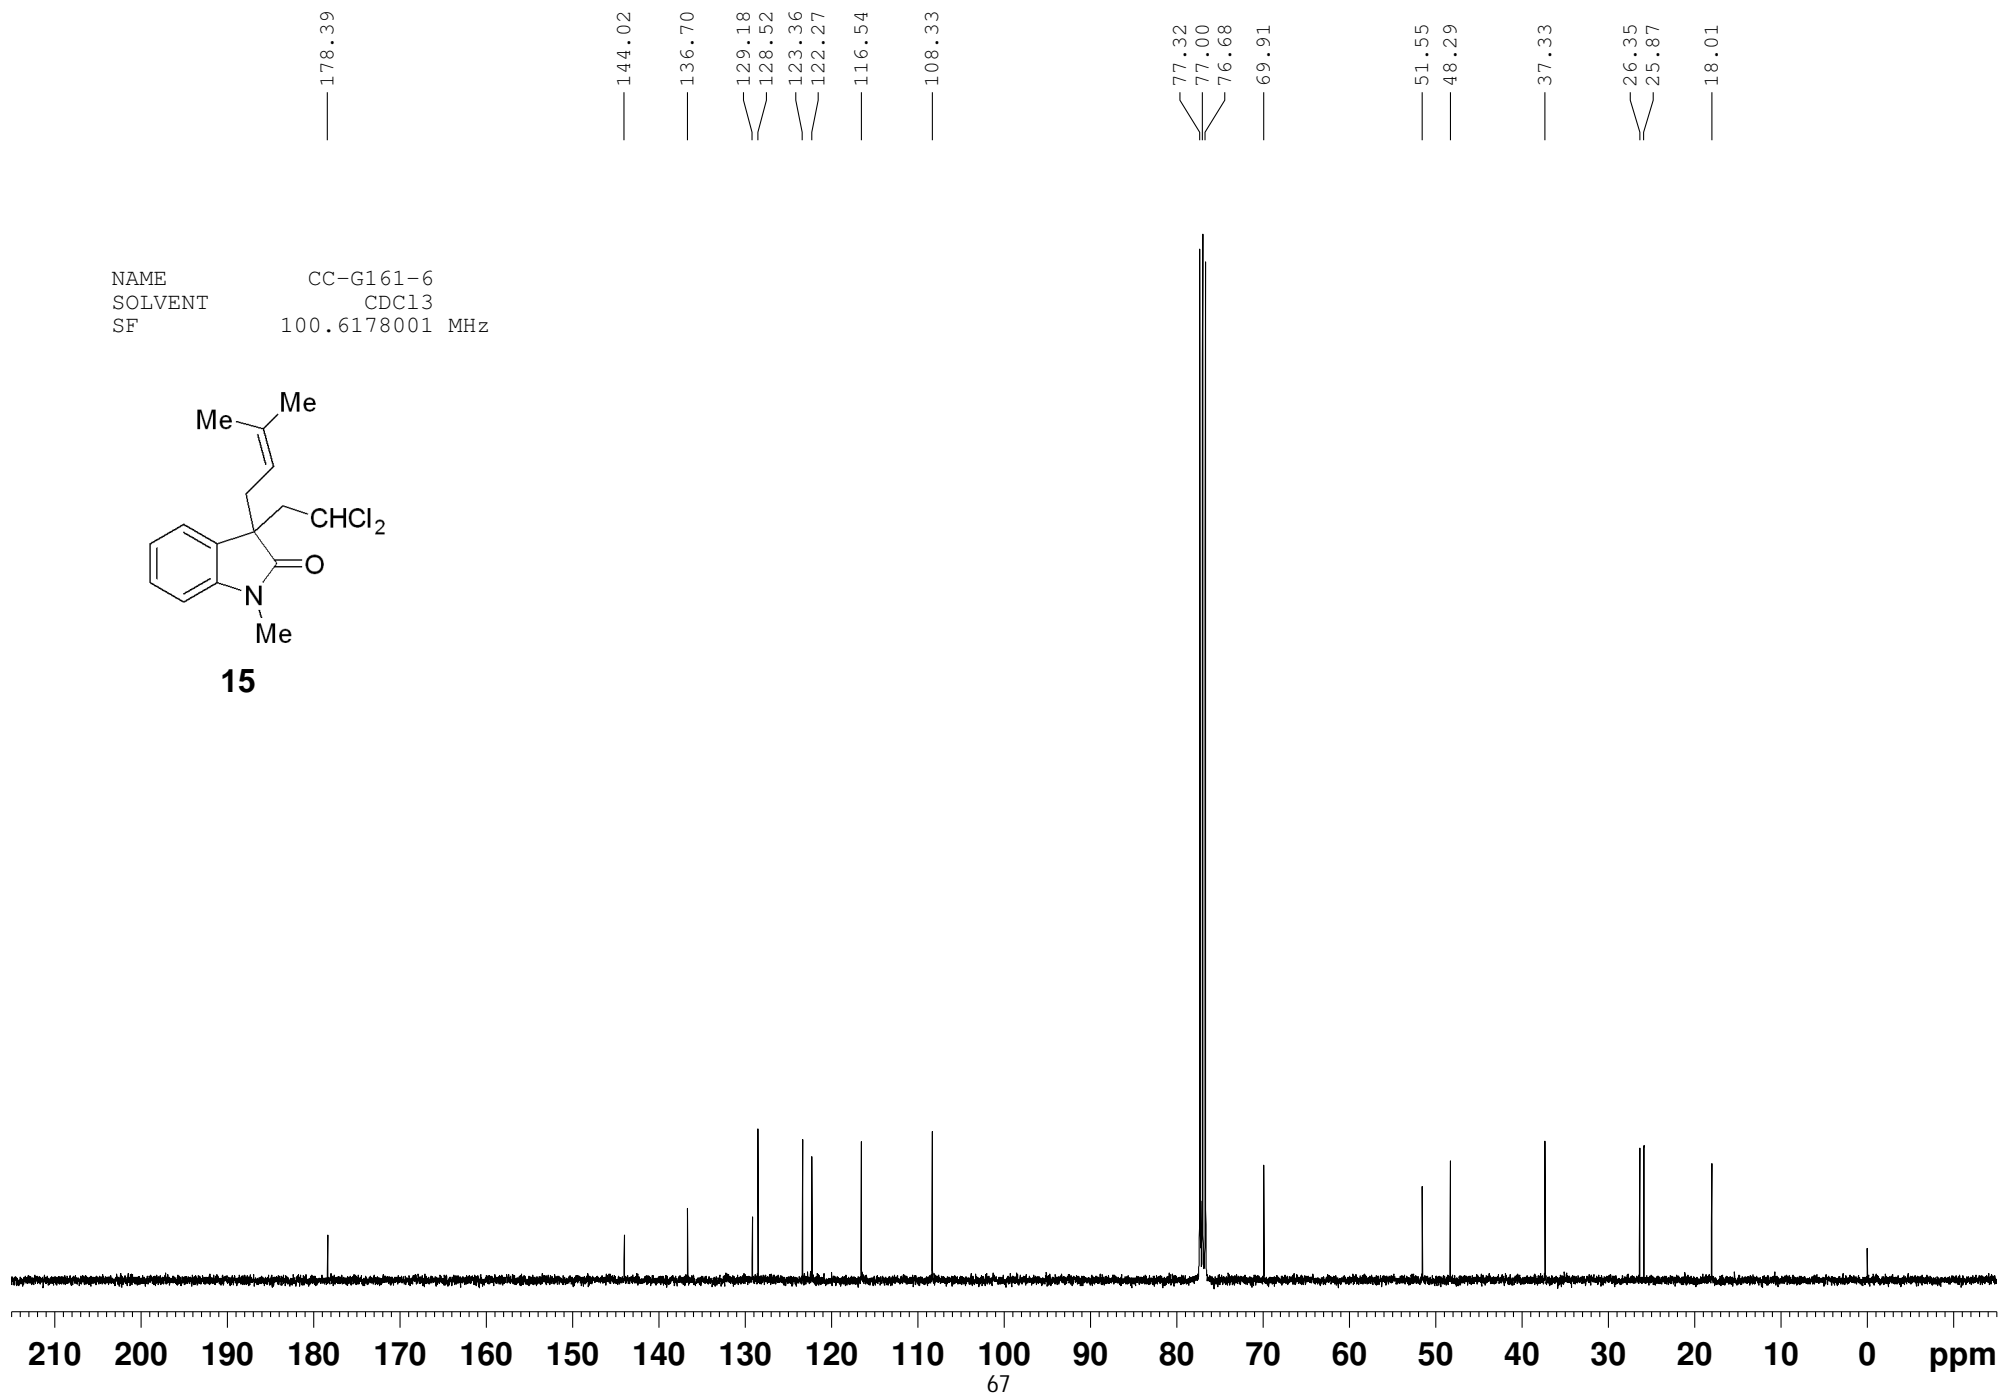

NAME cc-g116-2  
SOLVENT CDCl3  
SF 400.1500096 MHz

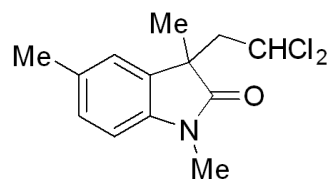

**16**

7.260  
7.121  
7.119  
7.117  
7.101  
7.099  
7.002  
7.001  
6.768  
6.748

5.412  
5.402  
5.388  
5.378

3.180  
3.051  
3.027  
3.014  
2.990  
2.699  
2.689  
2.662  
2.652  
2.363

1.376

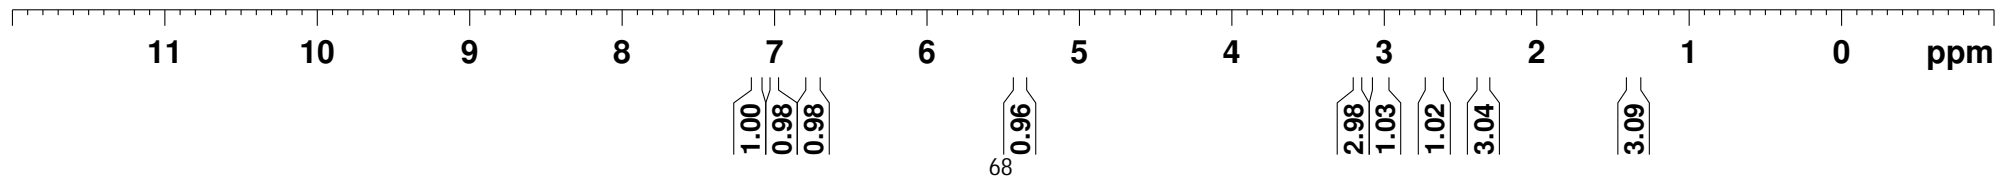

NAME cc-g116-2  
SOLVENT CDCl3  
SF 100.6178015 MHz

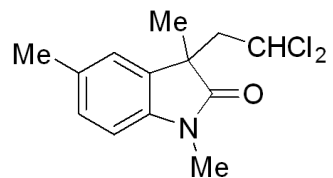

**16**

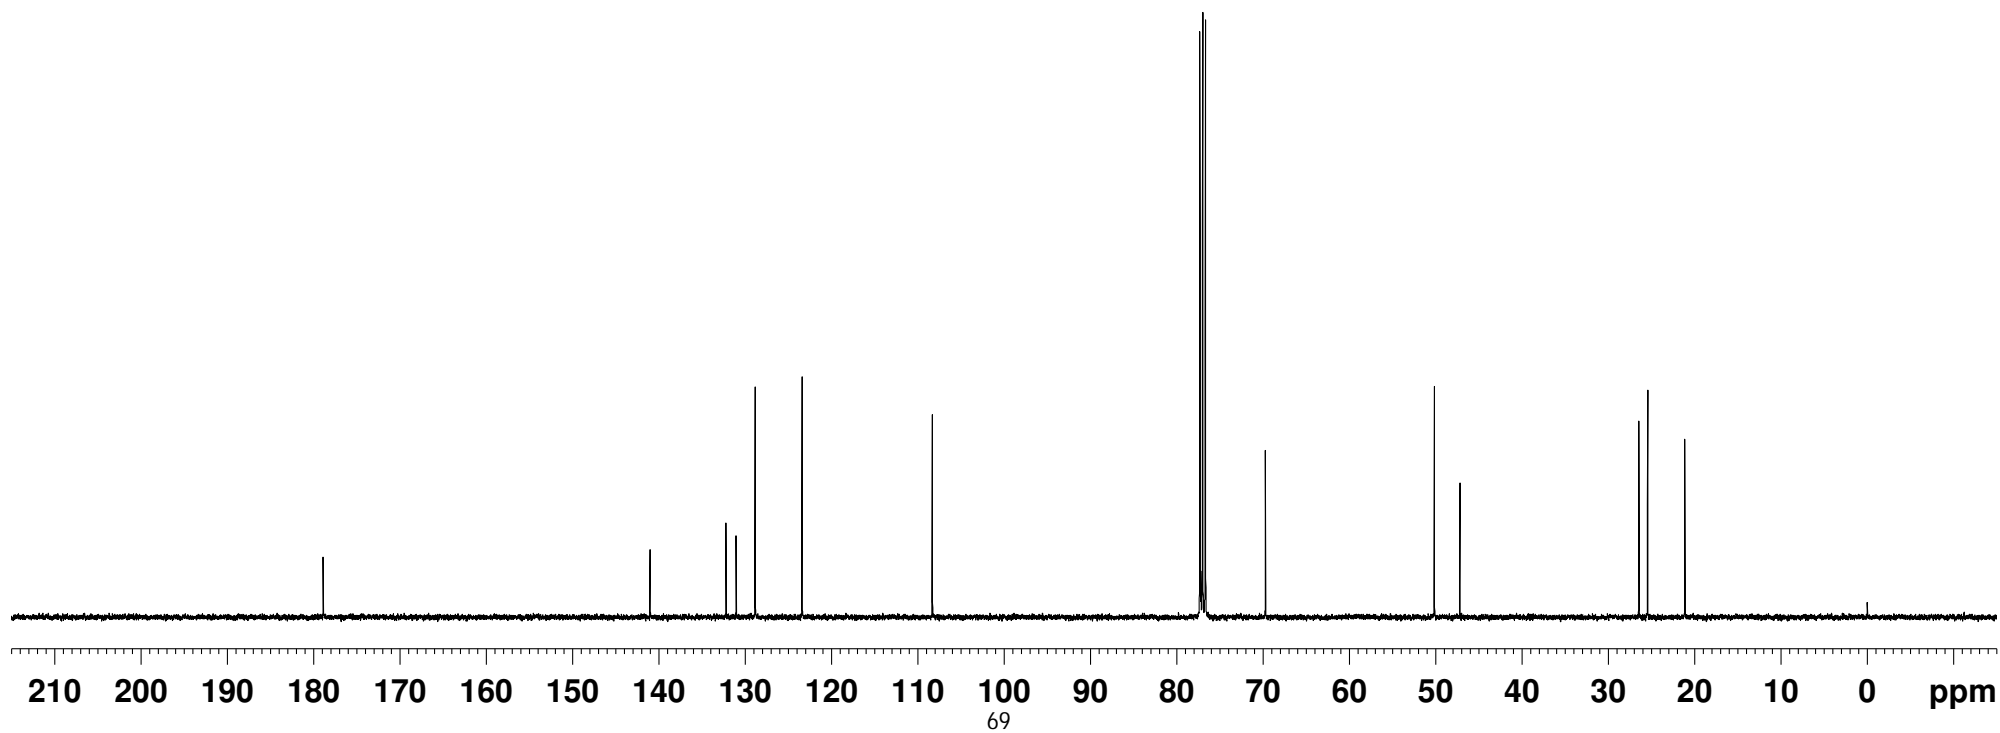

NAME cc-g110-6  
SOLVENT CDCl3  
SF 400.1500096 MHz

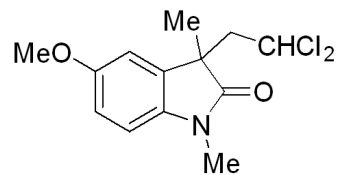

17

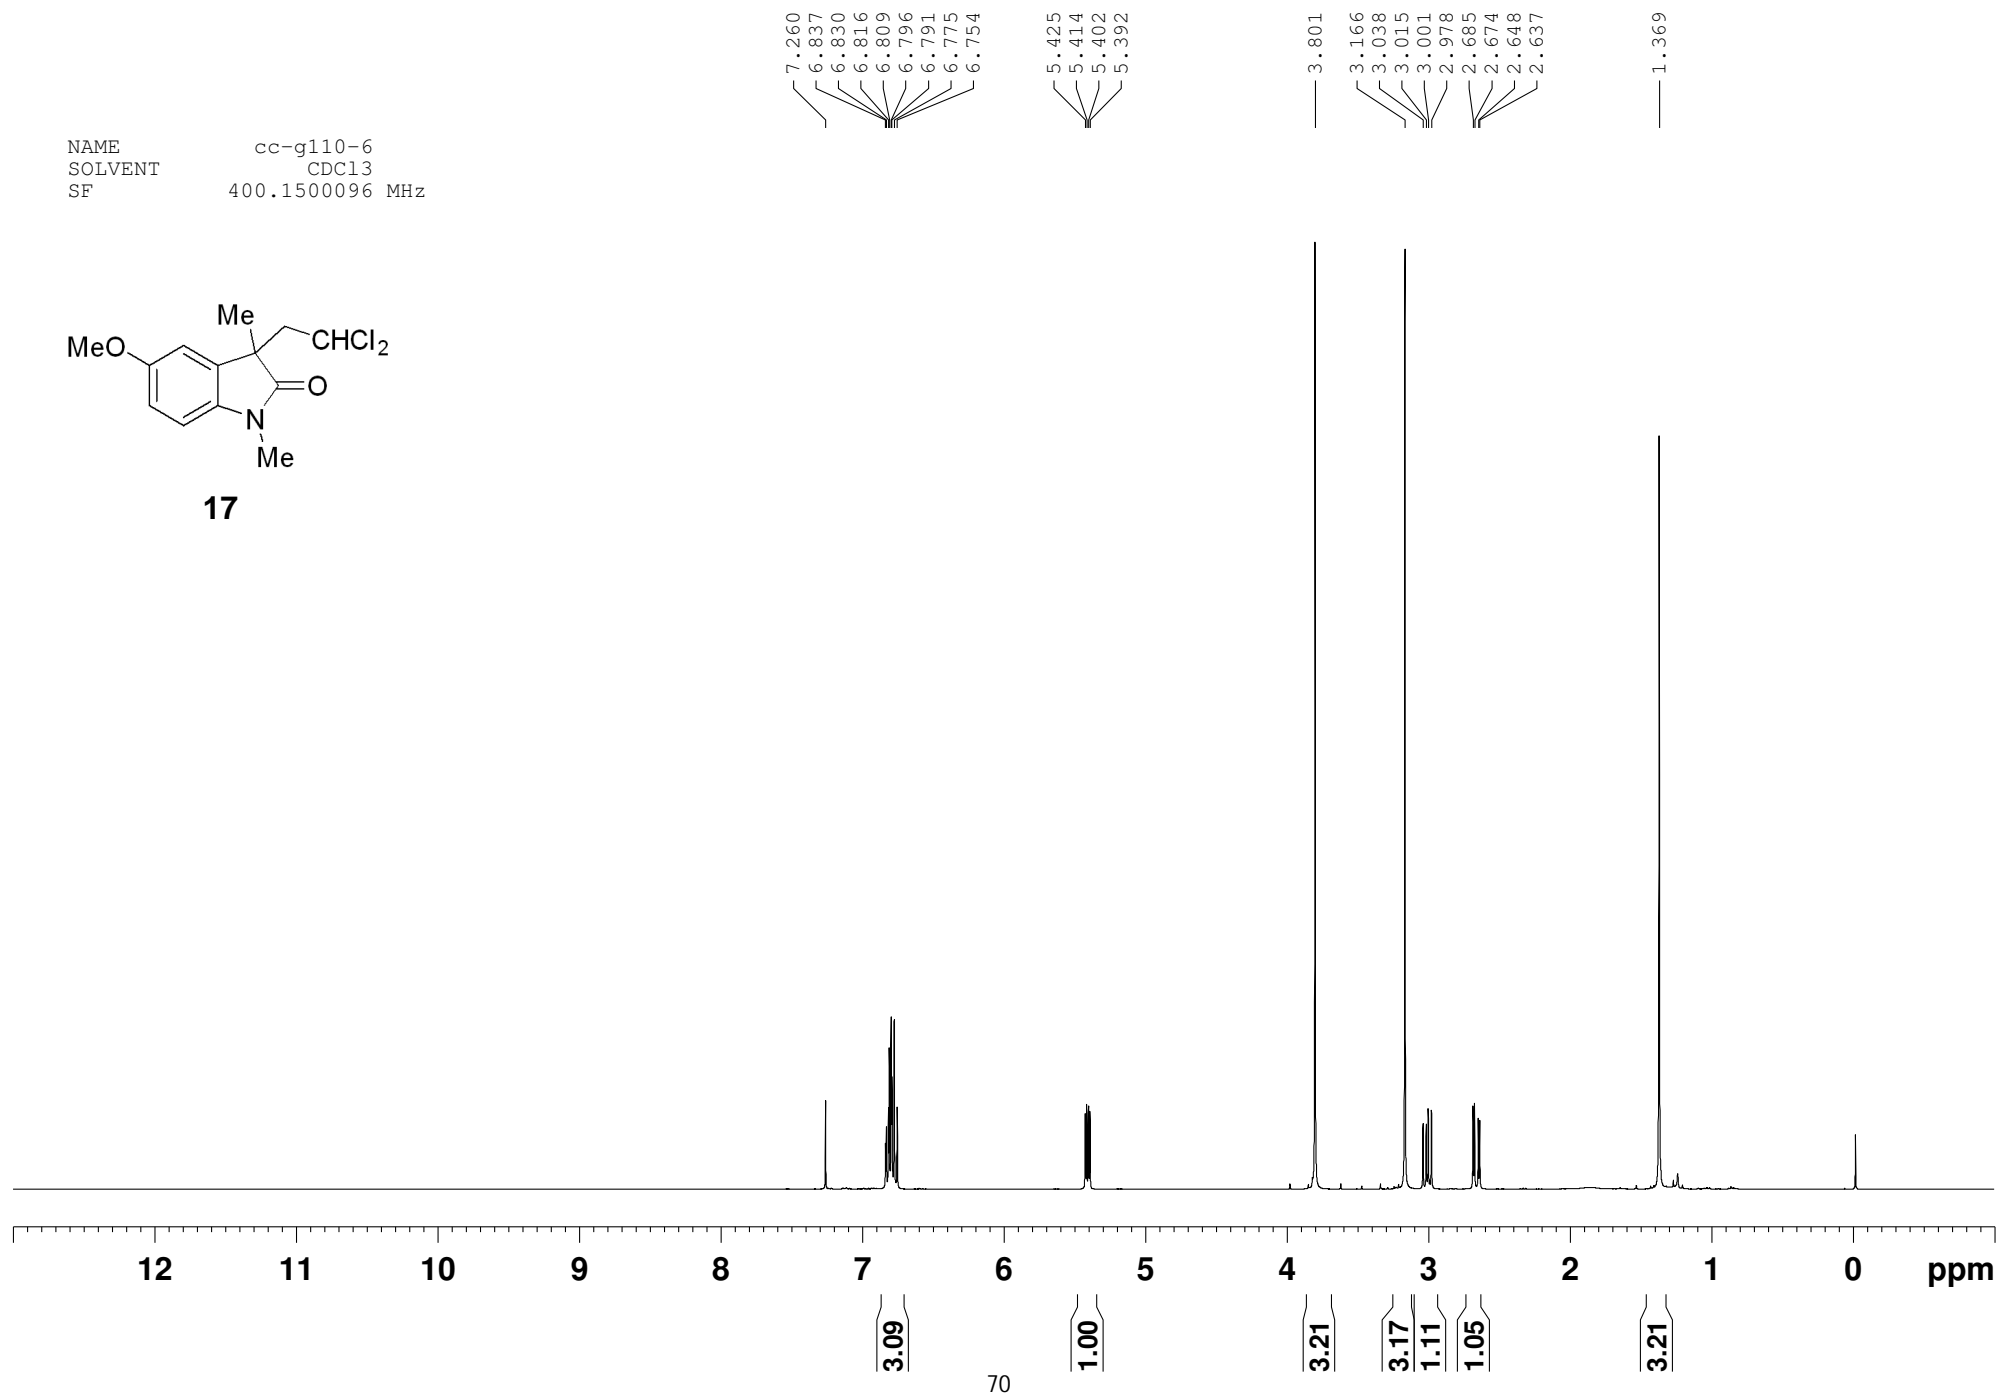

— 178.56  
— 156.06  
— 136.84  
— 132.42  
— 112.32  
— 110.46  
— 108.84  
— 77.32  
— 77.00  
— 76.68  
— 69.59  
— 55.78  
— 50.06  
— 47.52  
— 26.47  
— 25.40

NAME cc-g110-6  
SOLVENT CDCl3  
SF 100.6178045 MHz

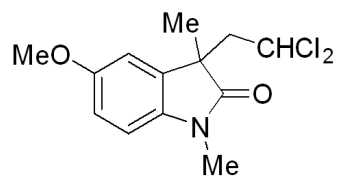

17

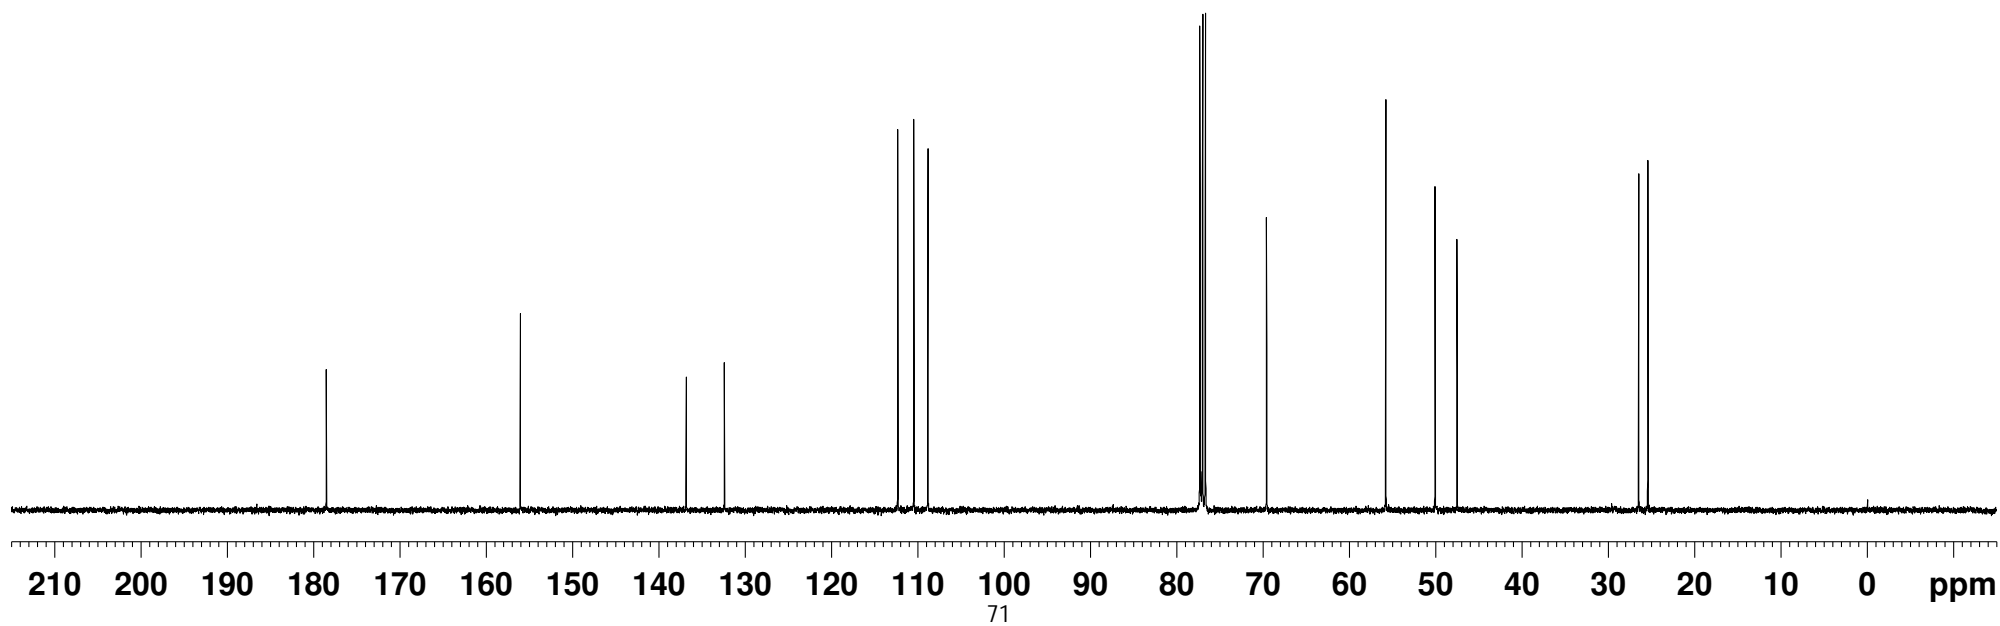

NAME cc-g155-1  
SOLVENT CDCl3  
SF 400.1500098 MHz

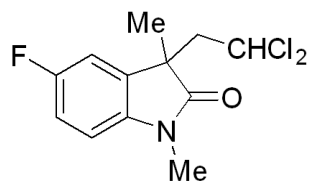

18

7.260  
7.035  
7.028  
7.013  
7.007  
6.991  
6.984  
6.968  
6.961  
6.948  
6.942  
6.801  
6.791  
6.780  
6.770  
5.430  
5.418  
5.408  
5.396

3.185  
3.042  
3.020  
3.005  
2.983  
2.700  
2.689  
2.663  
2.652

1.381

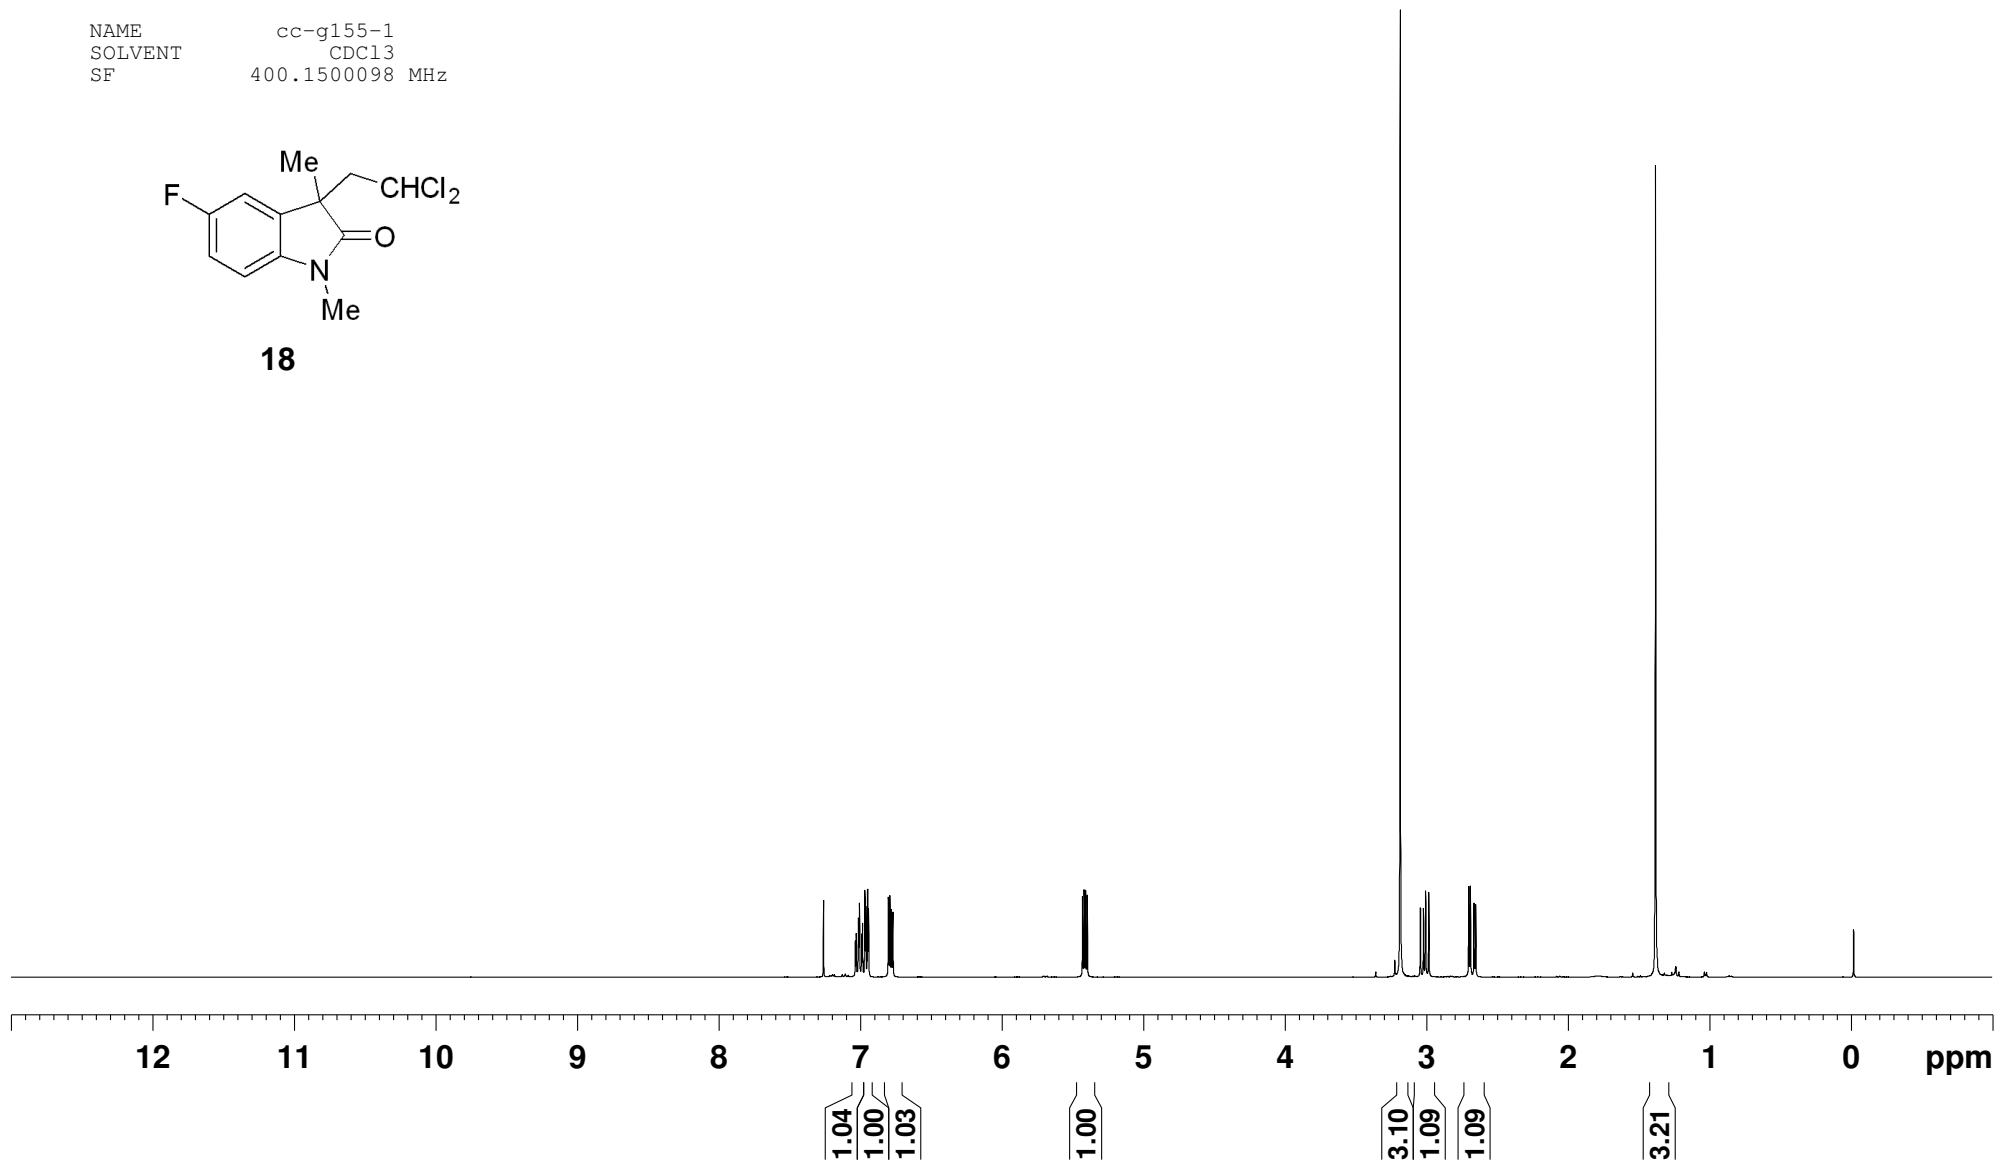



NAME cc-g155-1  
SOLVENT CDCl<sub>3</sub>

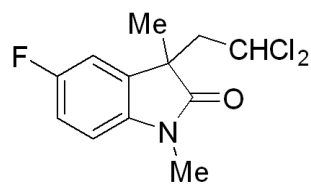

**18**

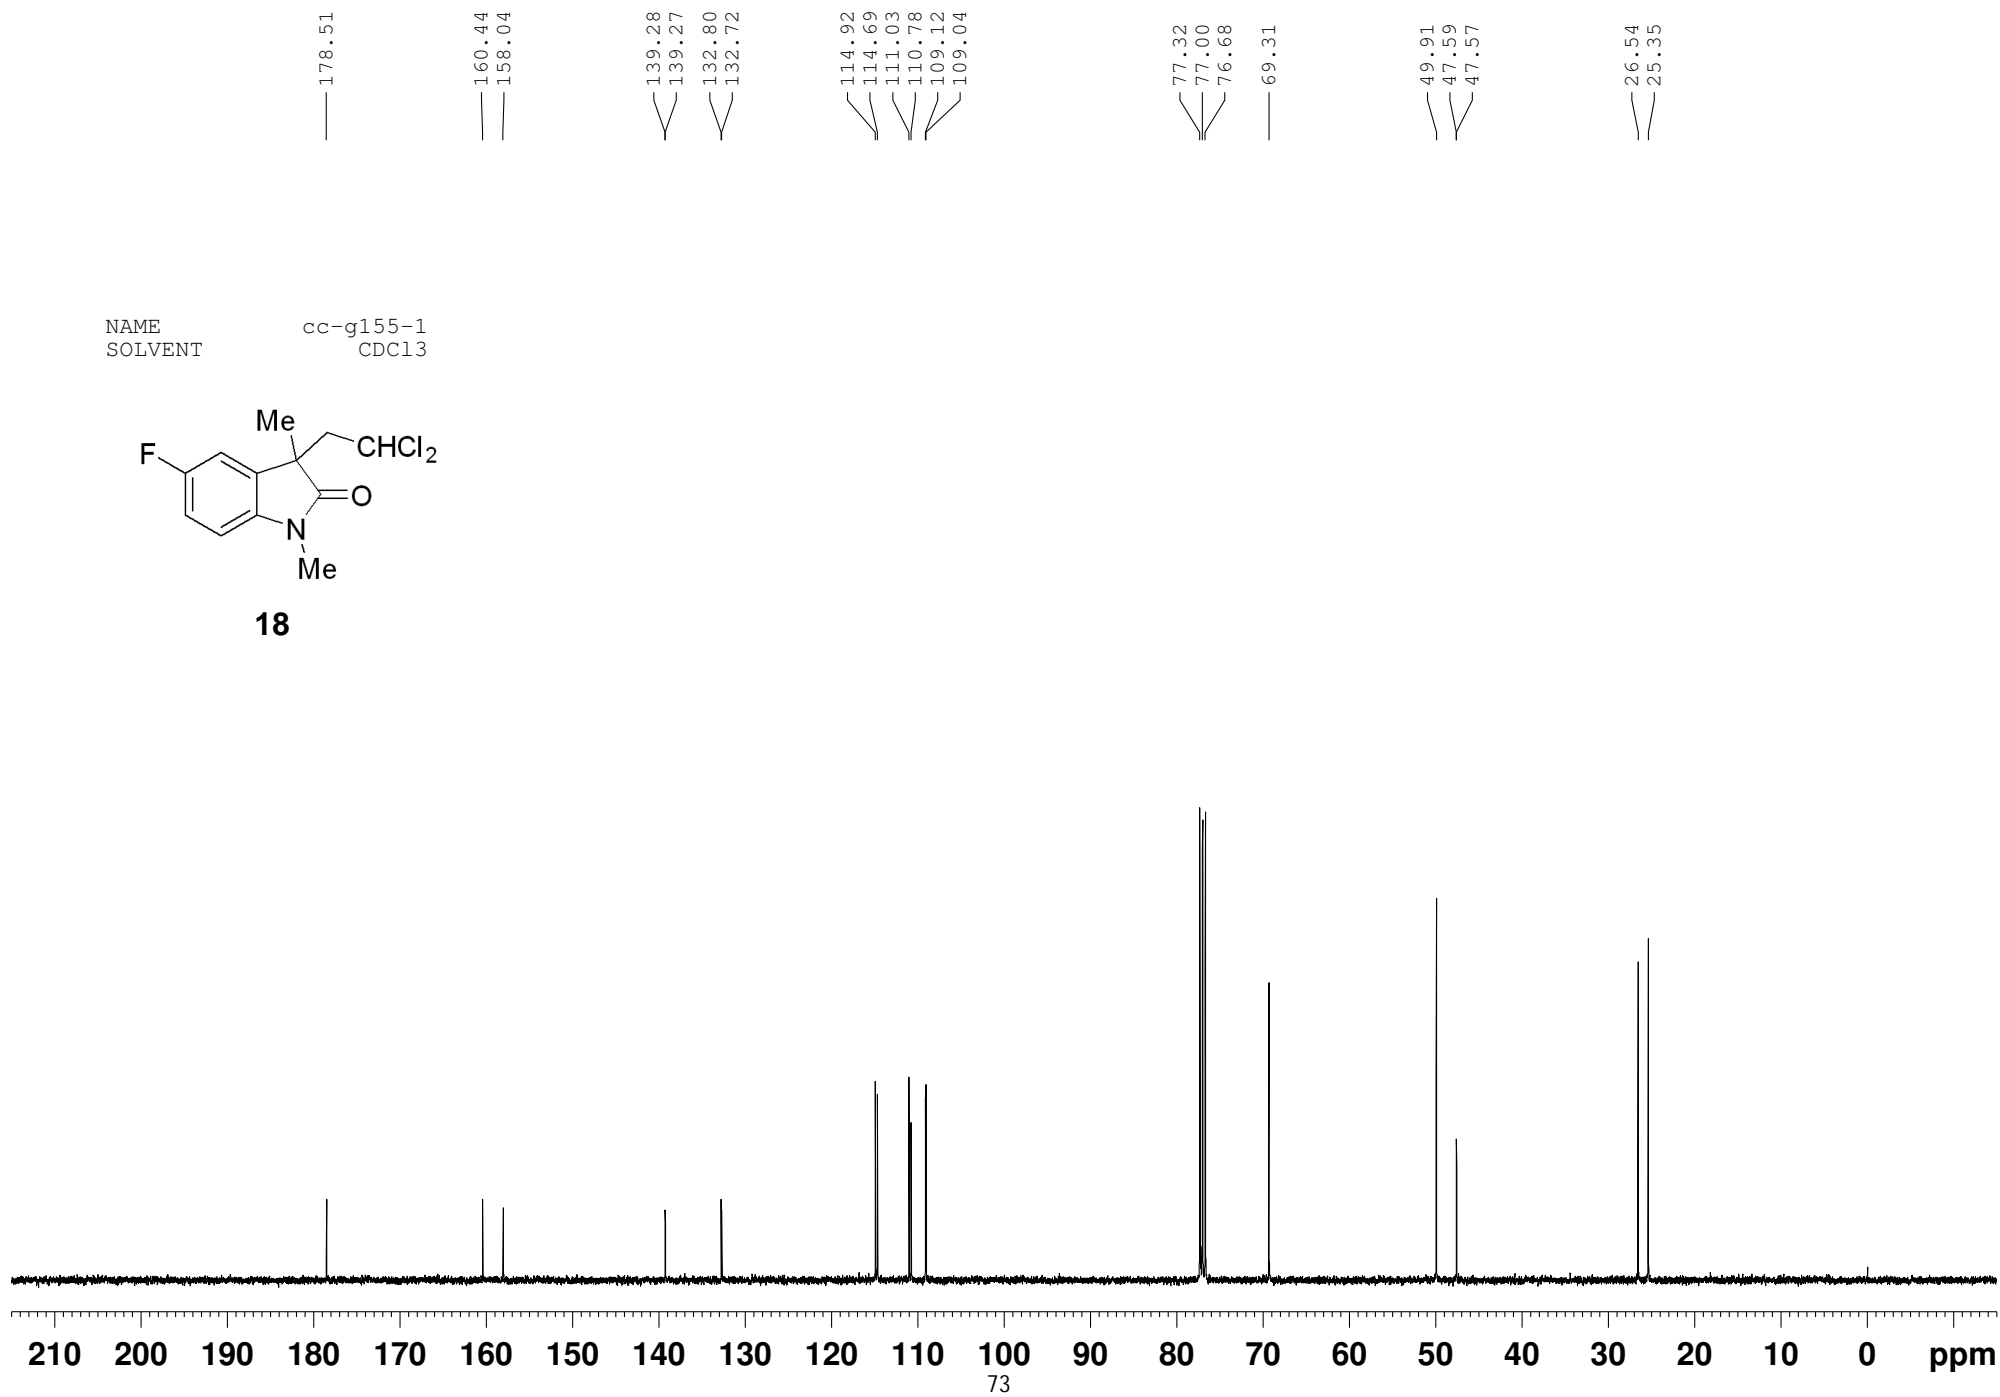

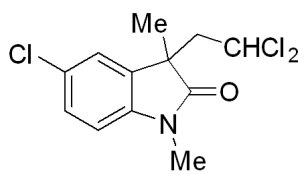

**19**

NAME cc-G110-12  
 SOLVENT CDCl3  
 SF 400.1500096 MHz

7.306  
 7.301  
 7.286  
 7.281  
 7.260  
 7.181  
 7.176  
 6.805  
 6.784

5.431  
 5.420  
 5.409  
 5.398

3.191  
 3.056  
 3.034  
 3.019  
 2.996  
 2.709  
 2.698  
 2.672  
 2.660

1.389

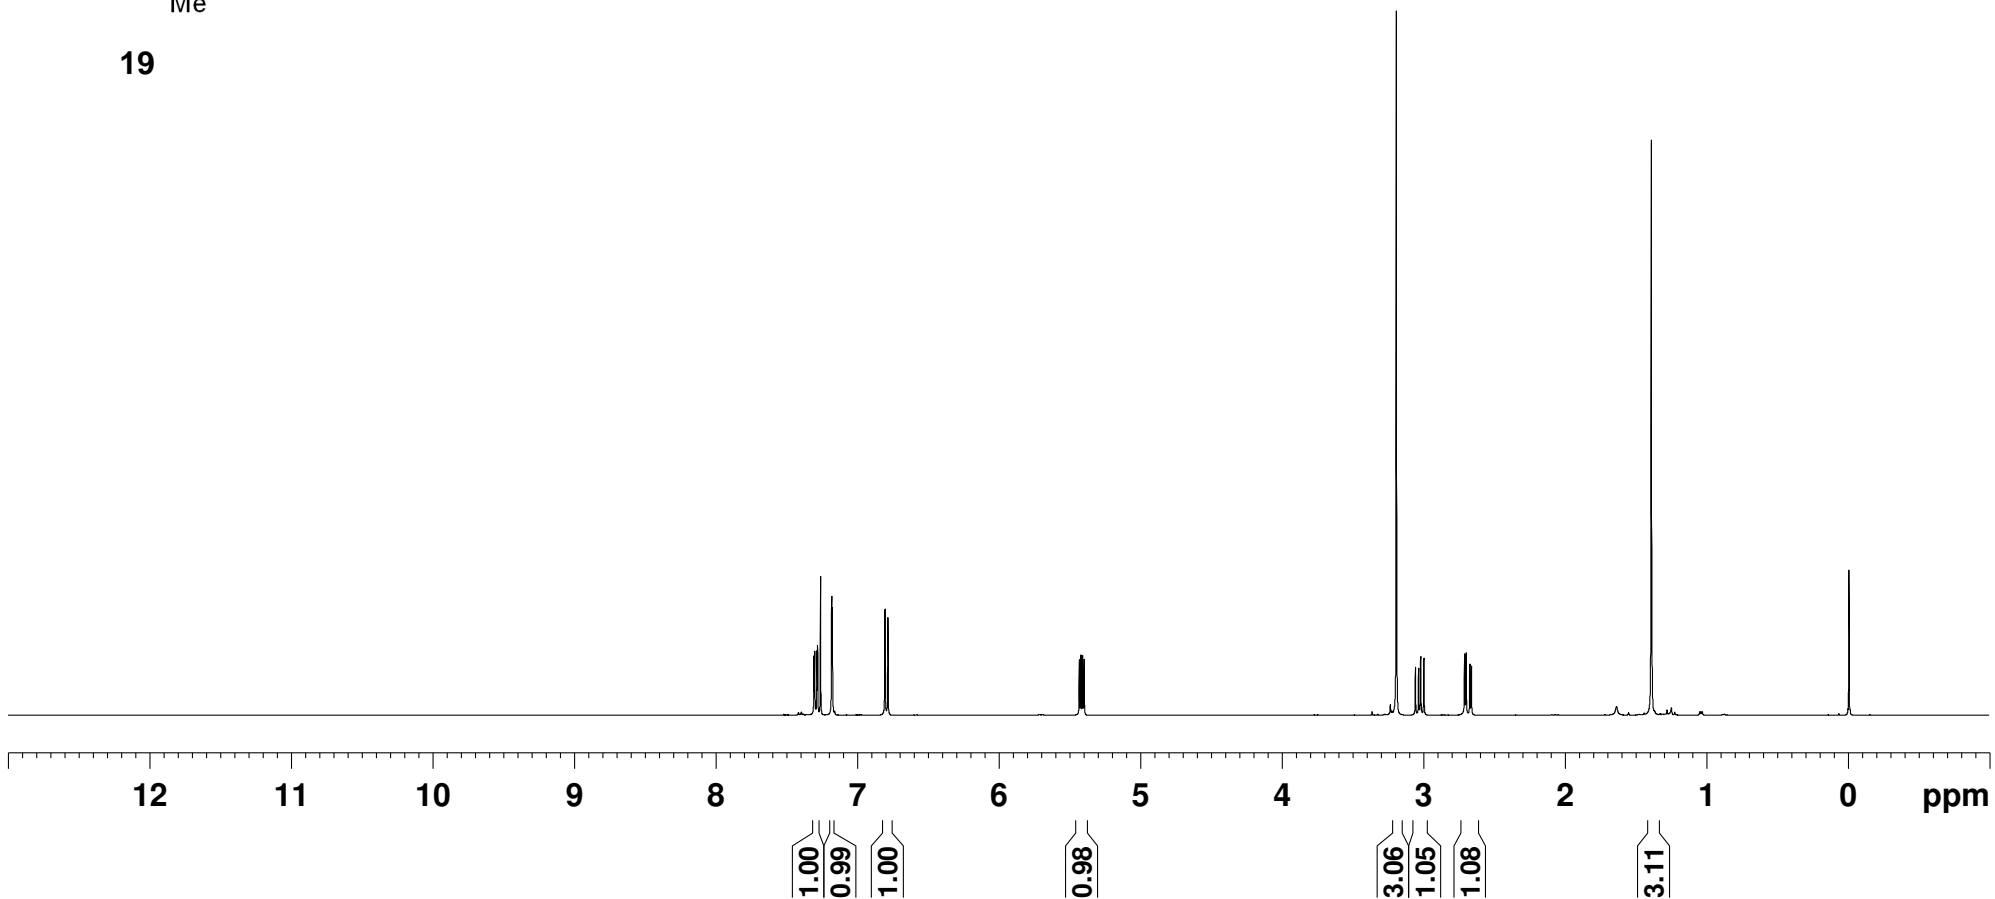

— 178.43

— 141.97

— 132.87

— 128.58

— 128.07

— 123.23

— 109.52

77.32

77.00

76.68

69.33

49.89

47.40

26.56

25.42

NAME cc-G110-12  
SOLVENT CDCl<sub>3</sub>  
SF 100.6178012 MHz

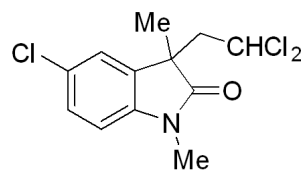

**19**

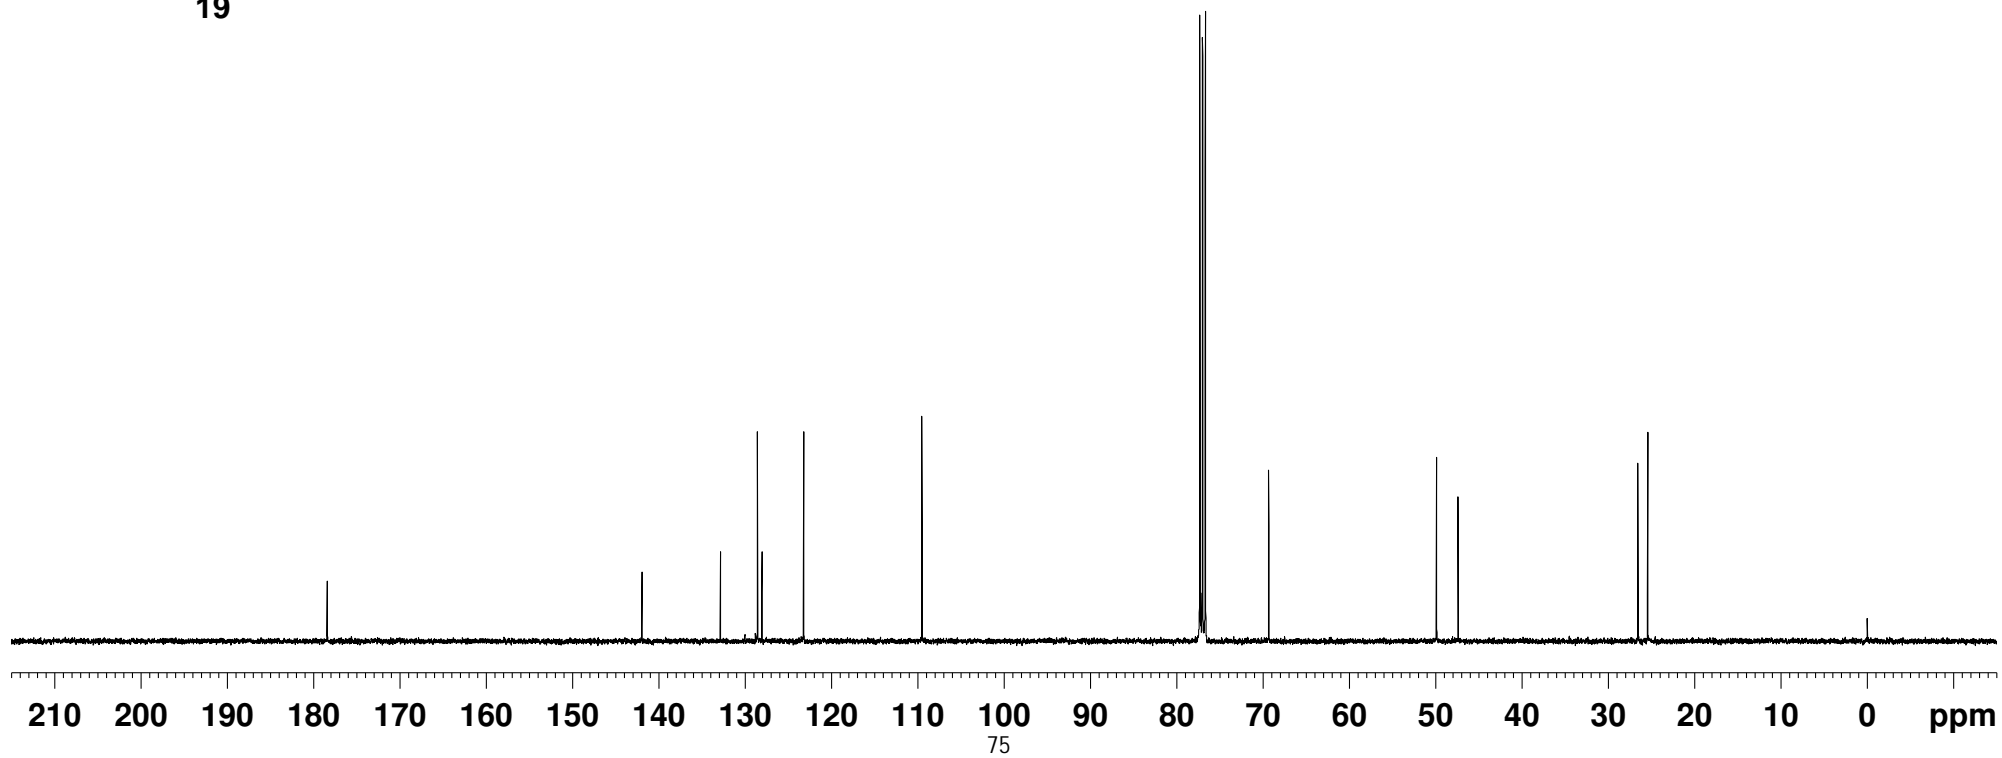

NAME cc-g155-2-0716  
SOLVENT CDC13  
SF 400.1500092 MHz

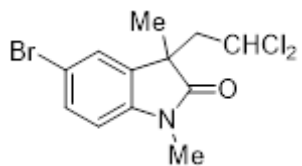

20

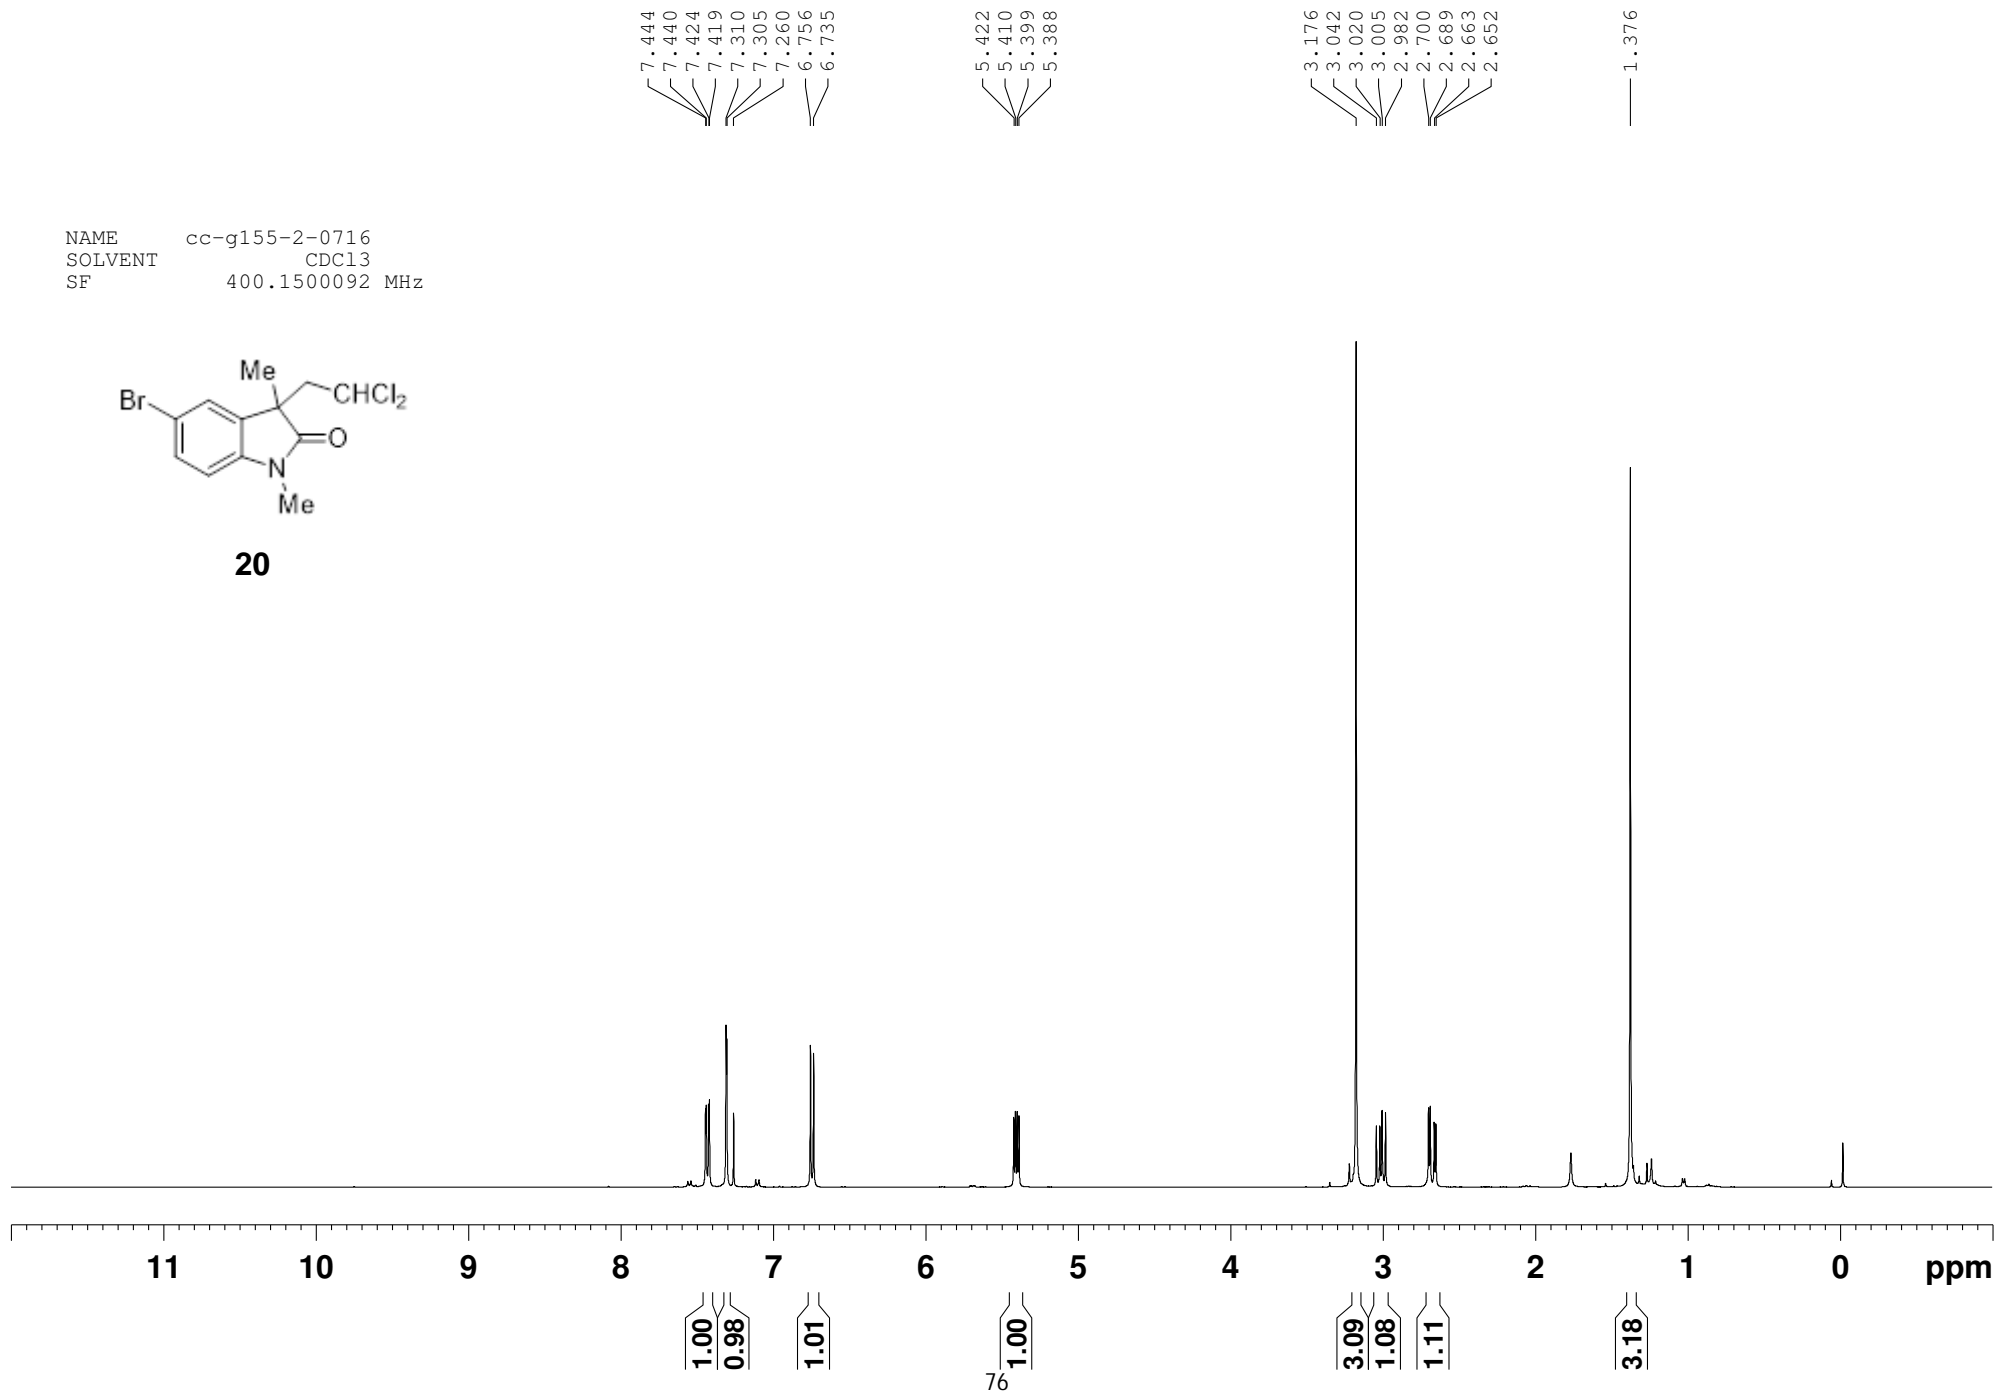

— 178.30

— 142.42

— 133.20

— 131.46

— 125.92

— 115.26

— 110.02

77.32

77.00

76.68

— 69.33

— 49.83

— 47.32

— 26.51

— 25.40

NAME cc-g155-2-0716  
SOLVENT CDCl<sub>3</sub>  
SF 100.6178045 MHz

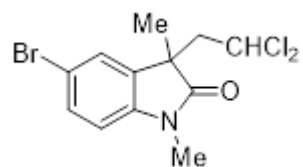

**20**

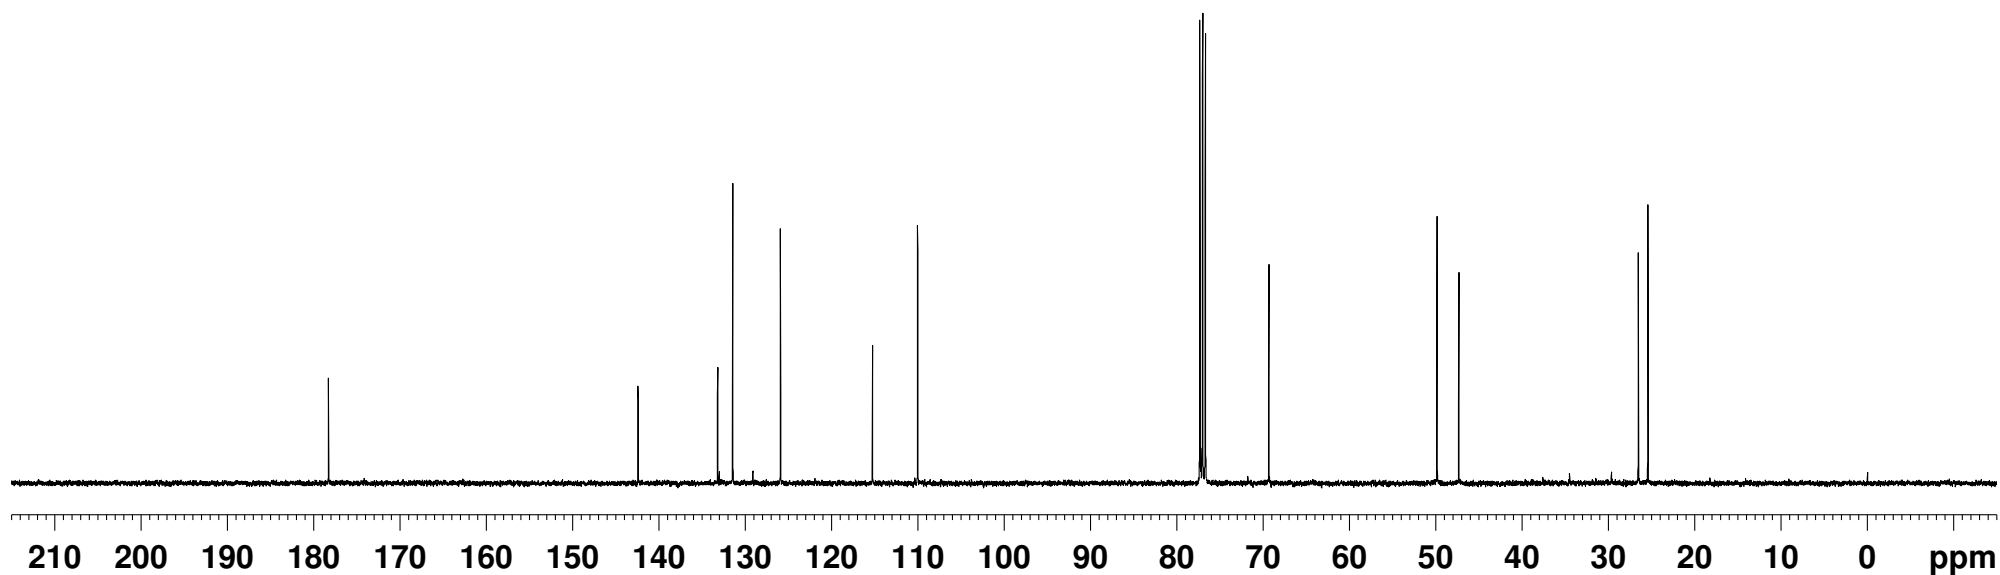

NAME cc-g155-4-1009  
SOLVENT CDCl3  
SF 400.1500090 MHz

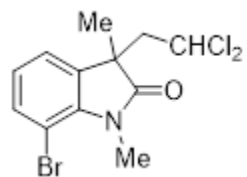

21

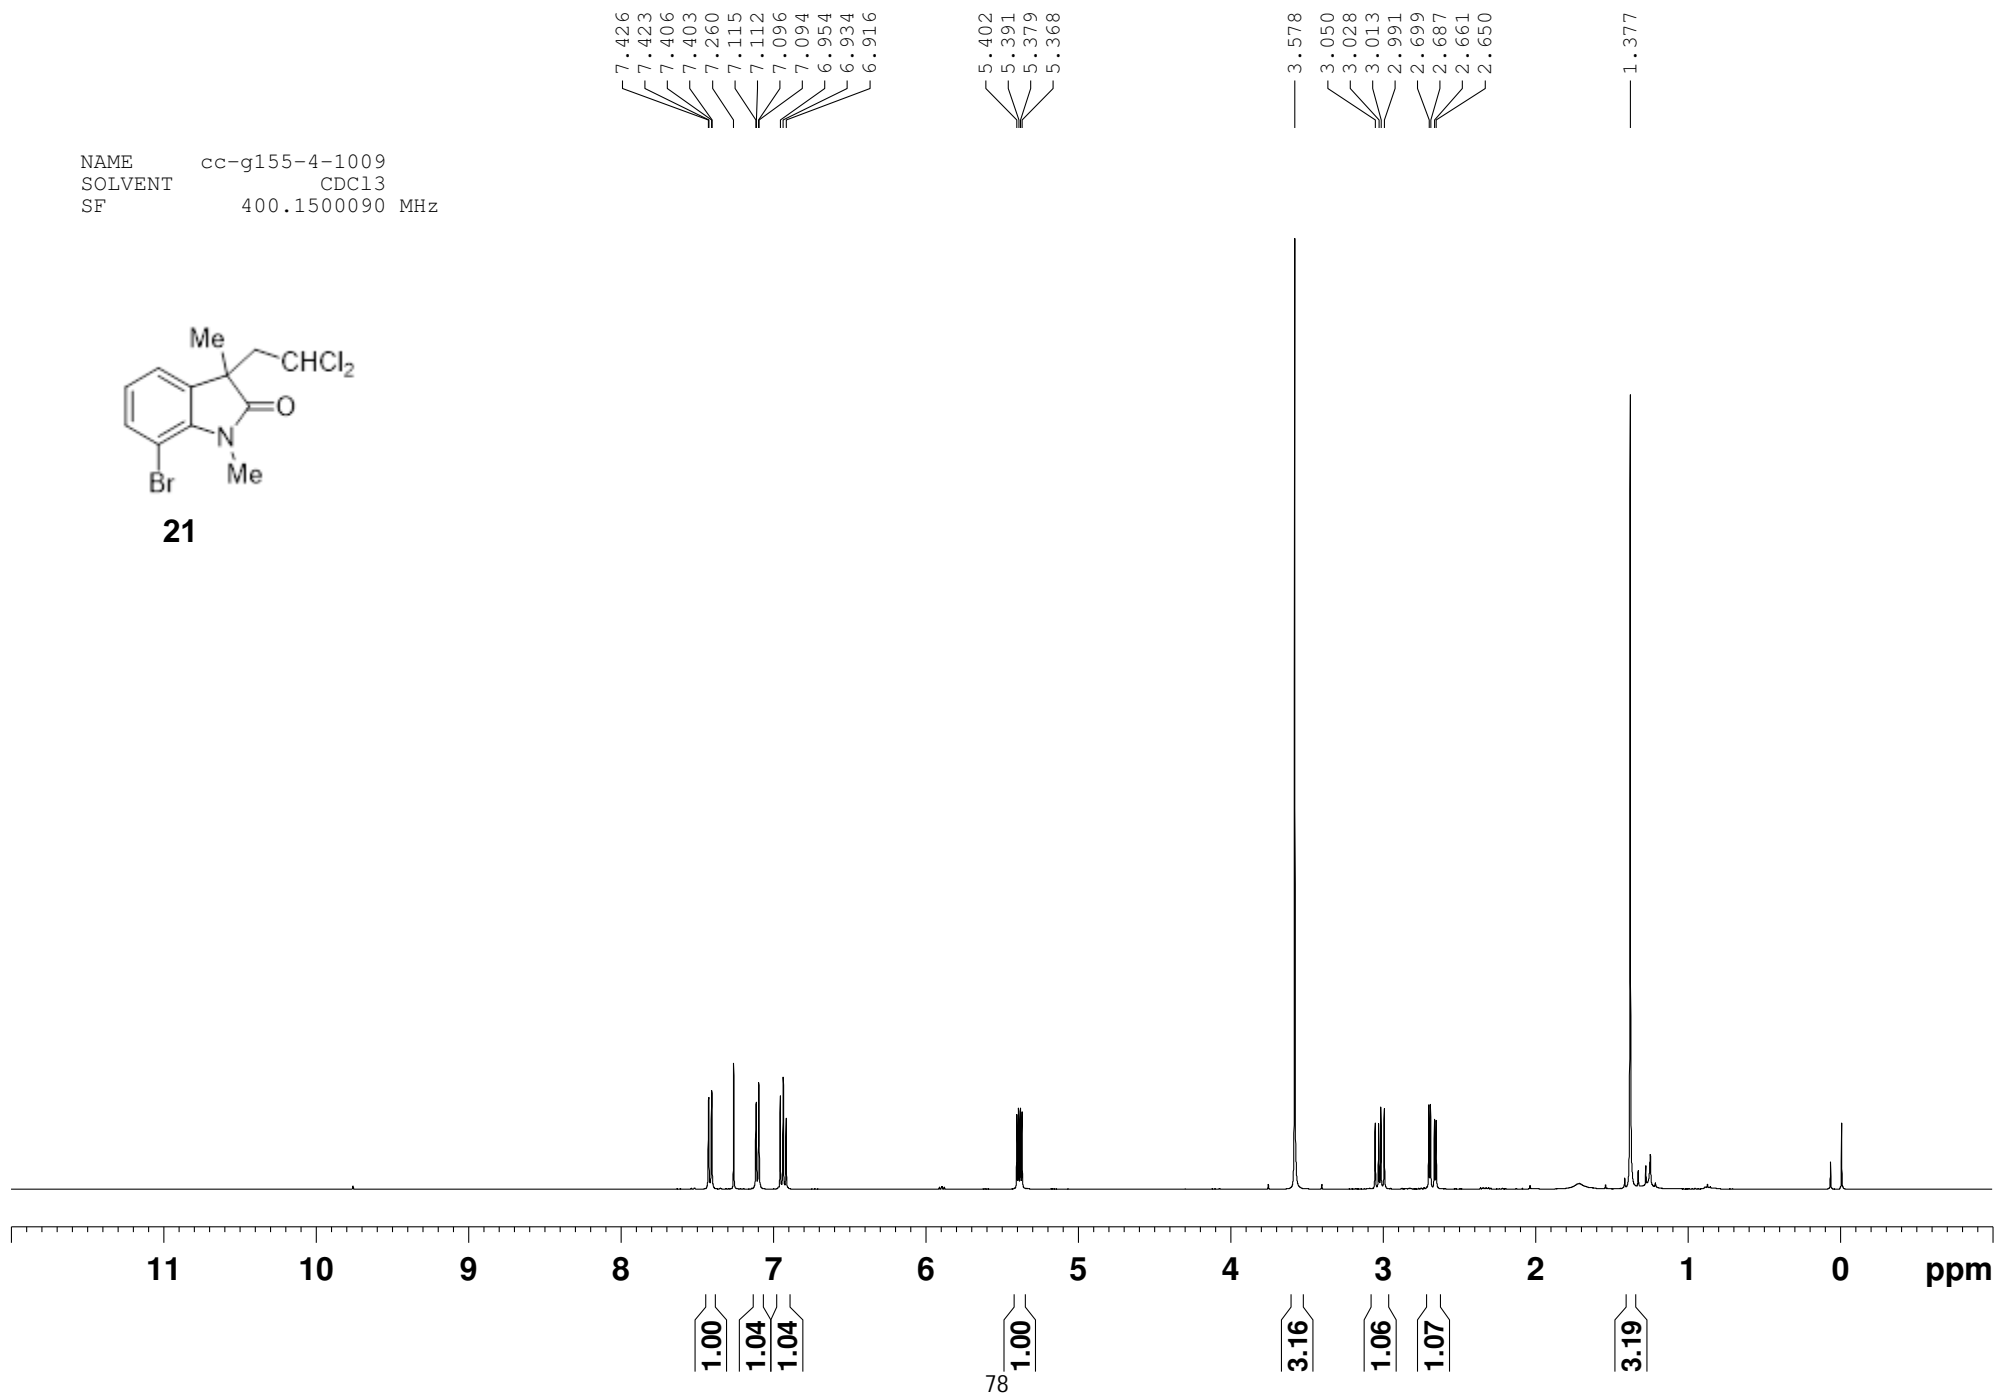

— 179.33

— 140.76

— 134.25  
— 134.23

— 123.80  
— 121.68

— 102.96

— 77.32  
— 77.00  
— 76.68

— 69.29

— 50.21  
— 46.86

— 30.03  
— 25.80

NAME cc-g155-4-1009  
SOLVENT CDCl<sub>3</sub>  
SF 100.6178023 MHz

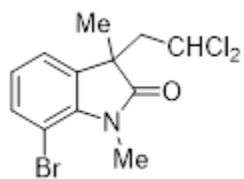

**21**

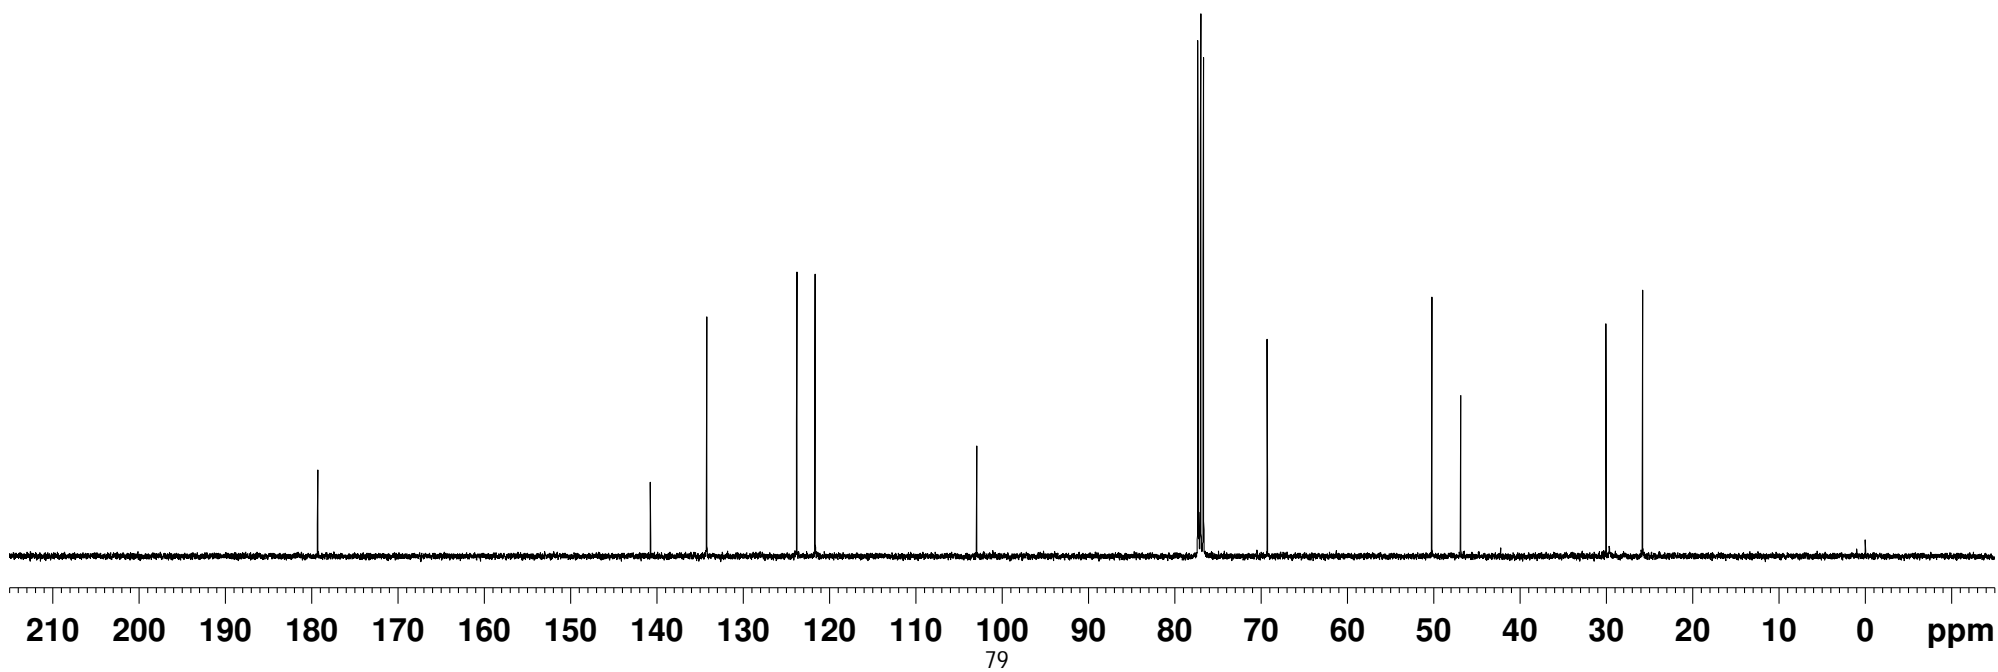

NAME cc-g155-5  
SOLVENT CDCl3  
SF 400.1500100 MHz

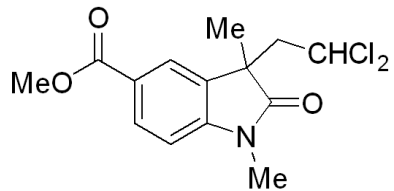

22

8.076  
8.072  
8.056  
8.051  
7.872  
7.869  
7.260  
6.915  
6.894  
5.384  
5.374  
5.361  
5.351  
3.917  
3.232  
3.076  
3.053  
3.039  
3.016  
2.775  
2.764  
2.738  
2.727  
1.406

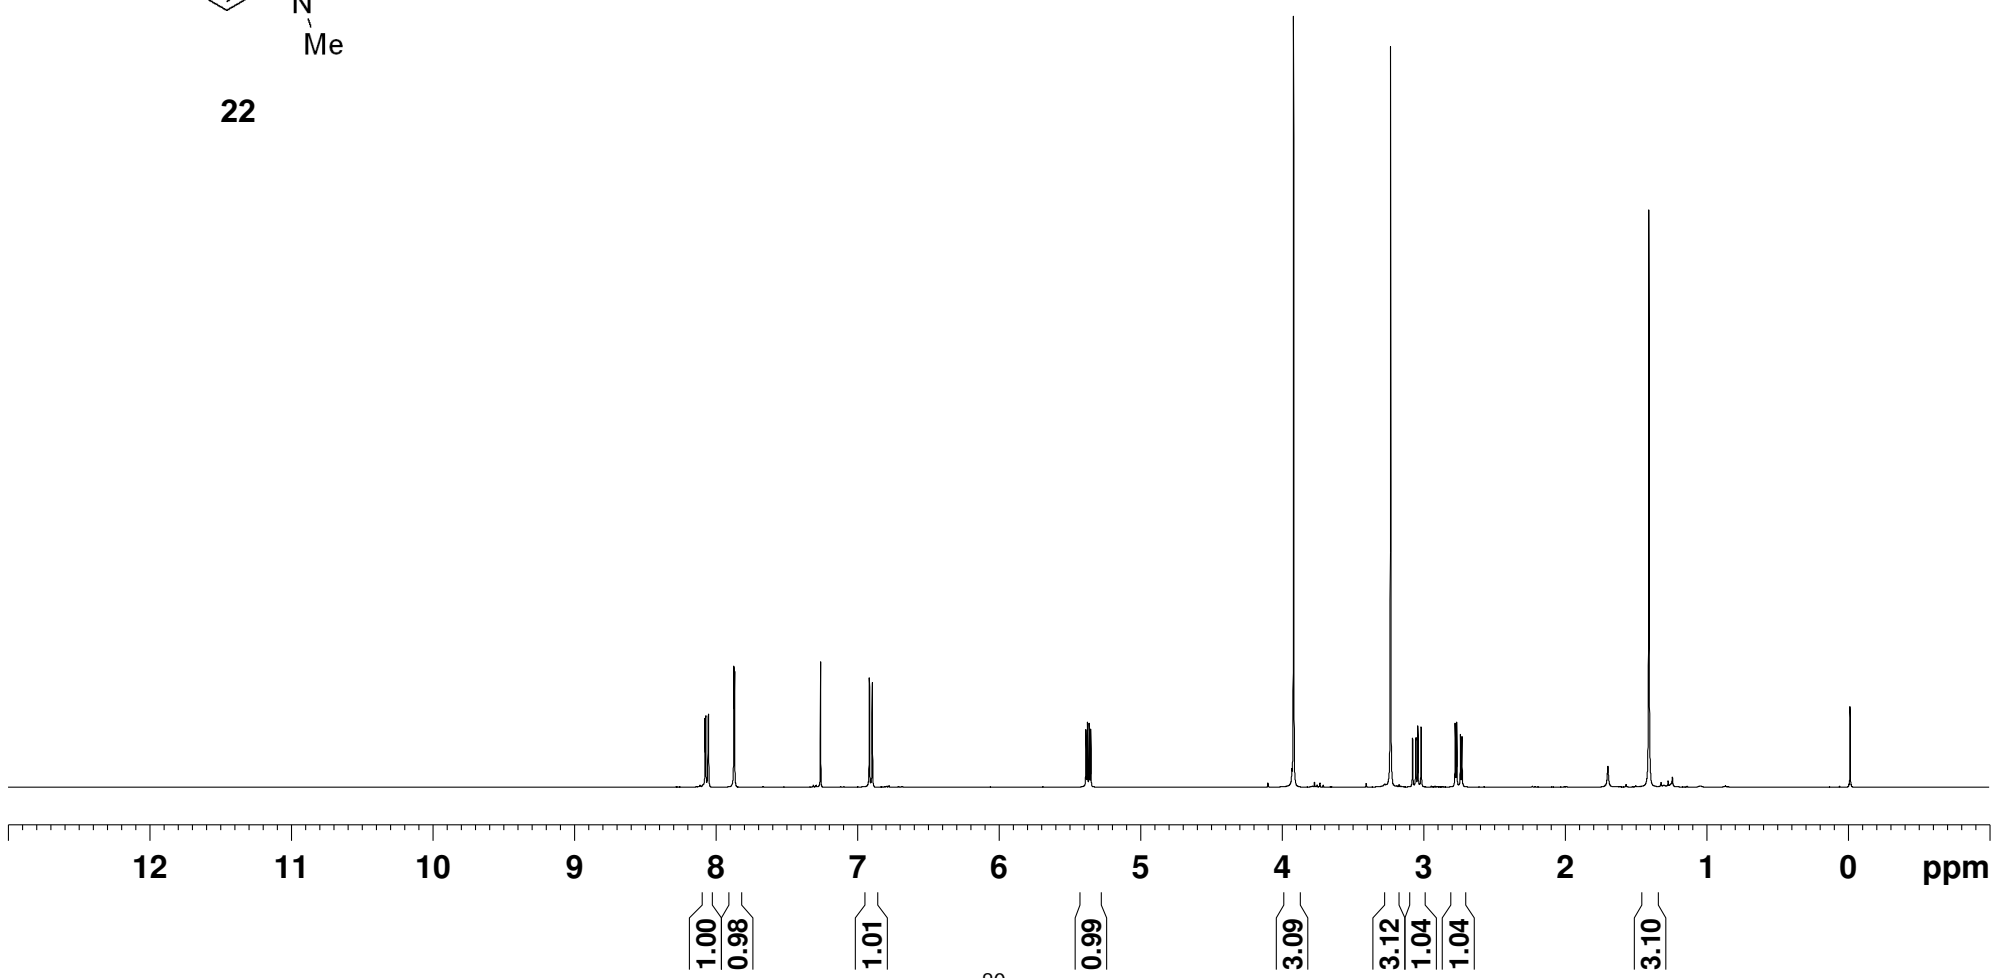



NAME cc-g155-5  
SOLVENT CDCl<sub>3</sub>  
SF 100.6178023 MHz

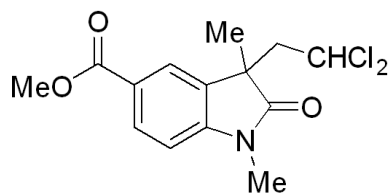

22

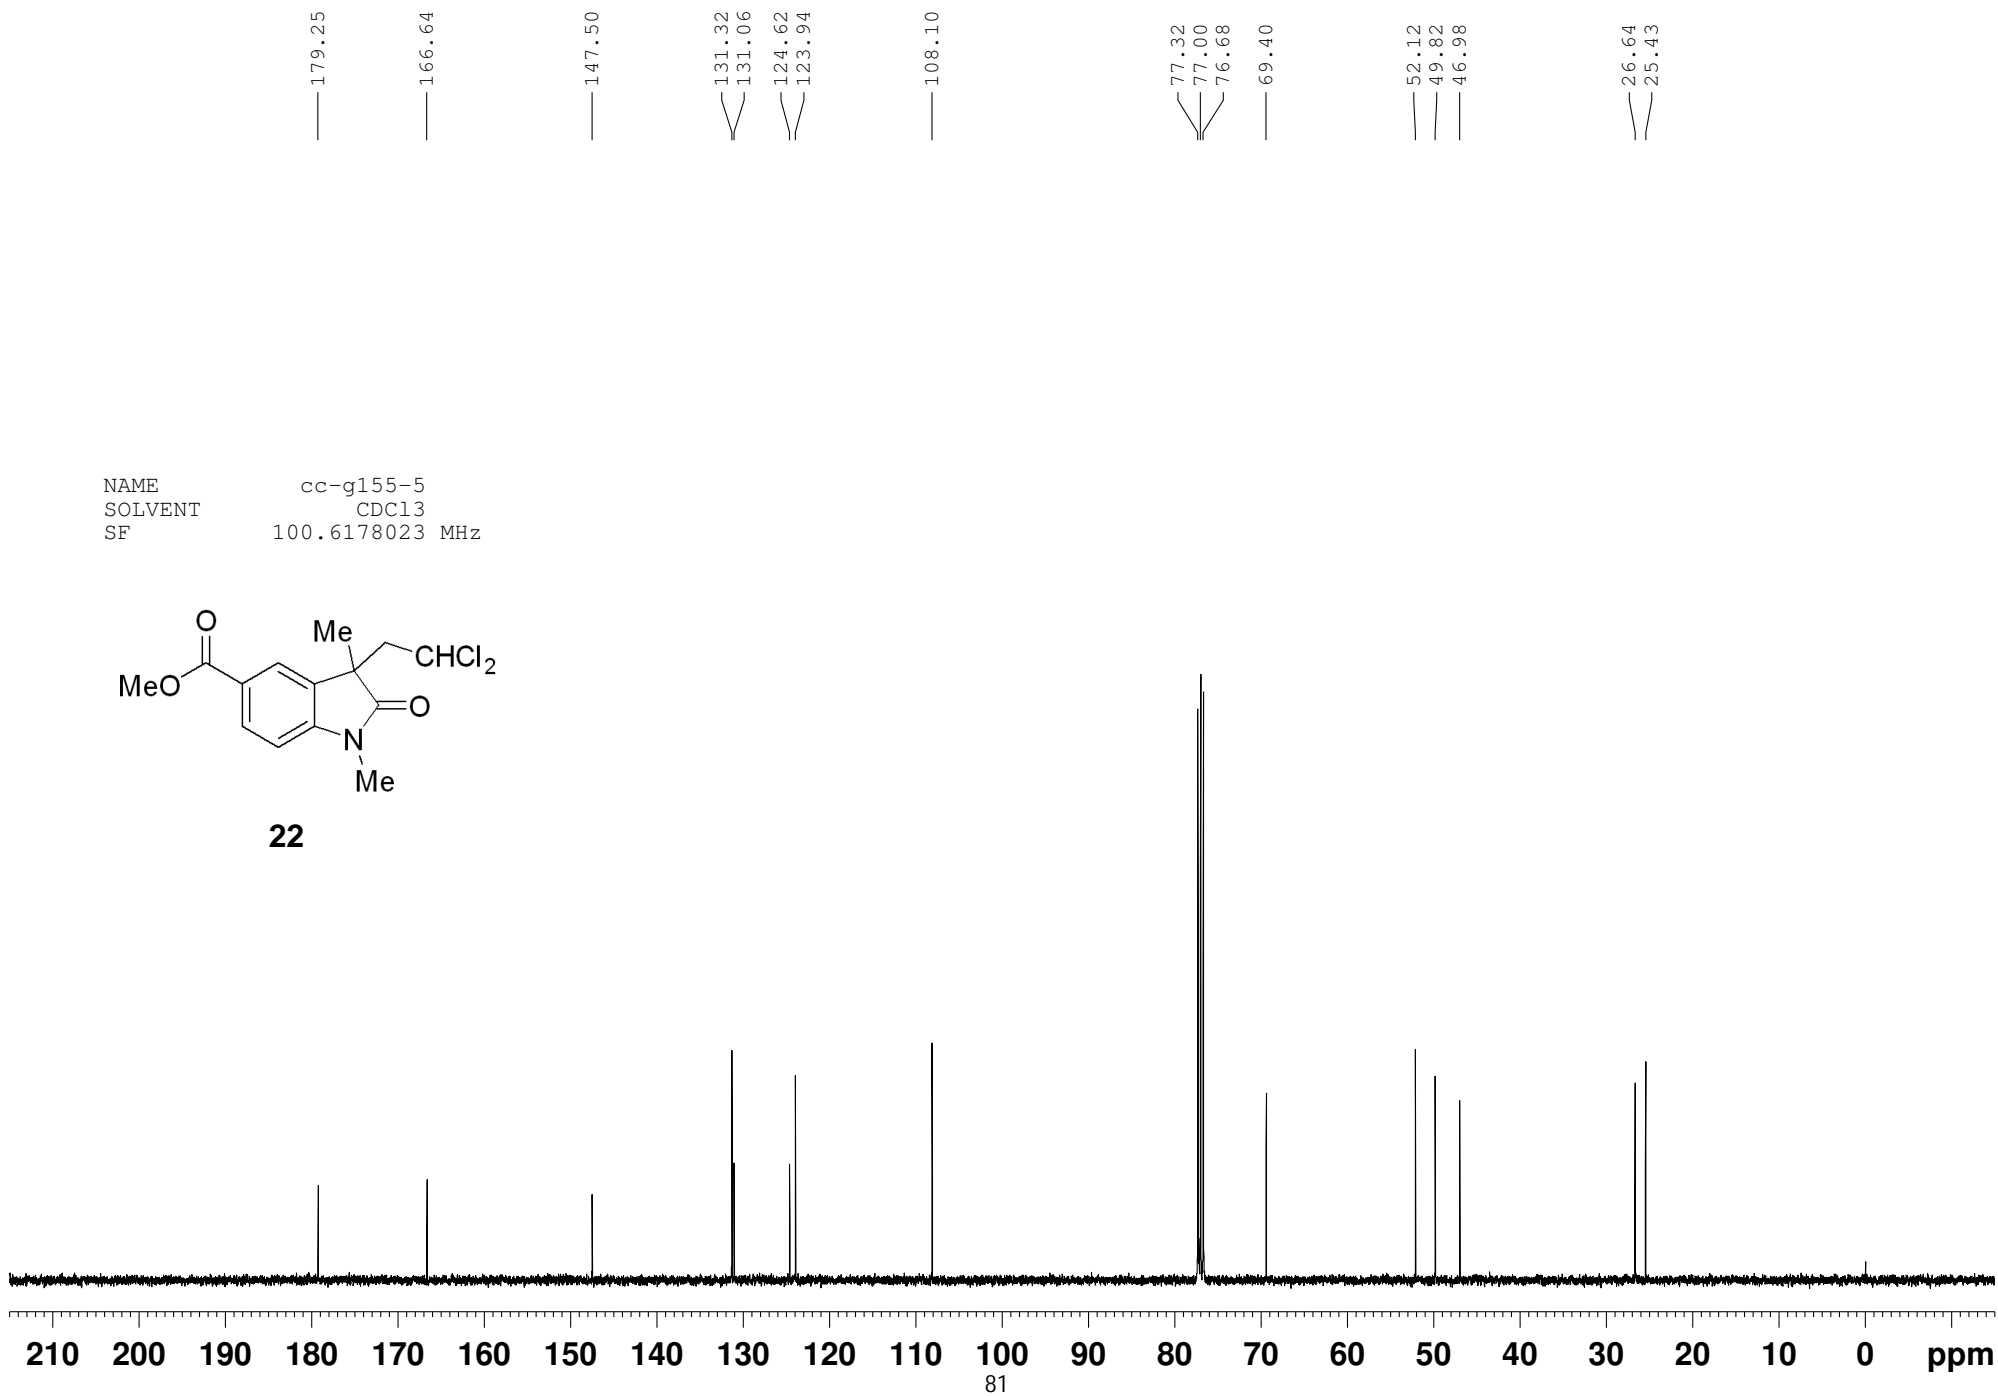

NAME cc-G116-3-1125  
SOLVENT CDCl3  
SF 400.1500101 MHz

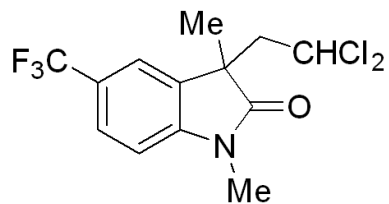

23

7.620  
7.600  
7.432  
7.260  
6.958  
6.938

5.404  
5.393  
5.382  
5.370

3.244  
3.089  
3.067  
3.052  
3.030  
2.774  
2.762  
2.736  
2.725

1.423

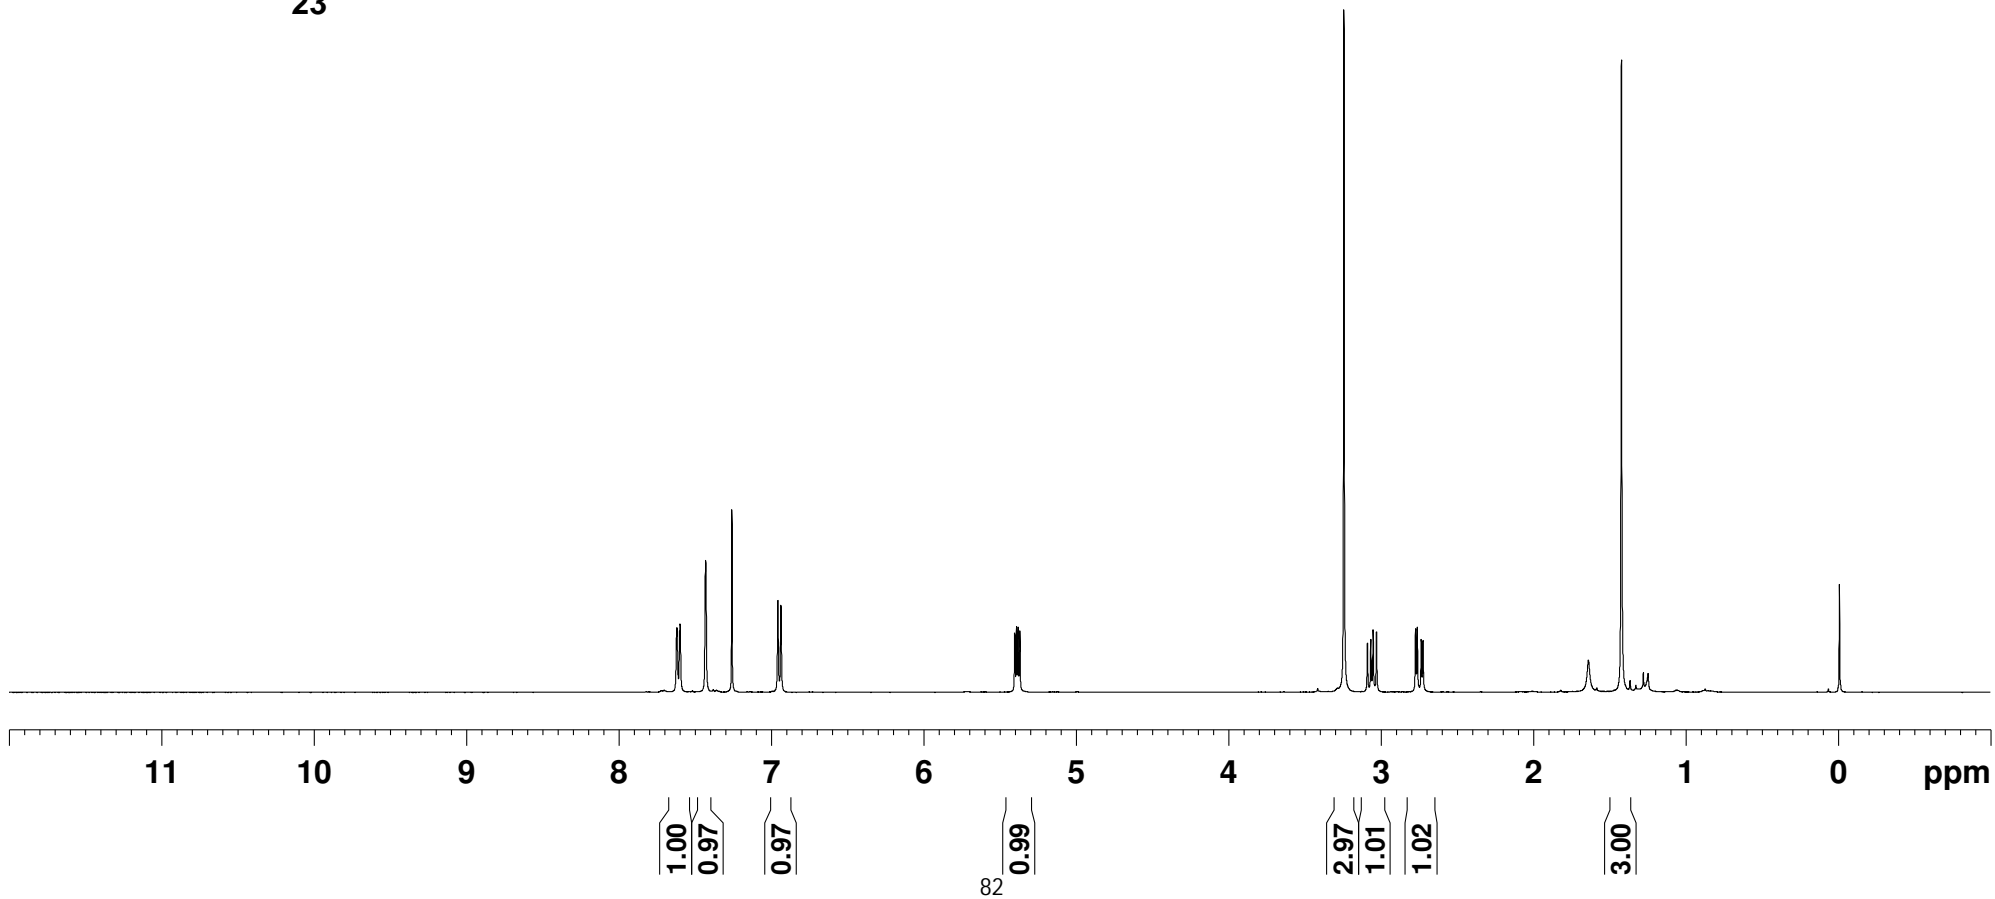

NAME cc-G116-3-1125  
SOLVENT CDCl3  
SF 100.6178019 MHz

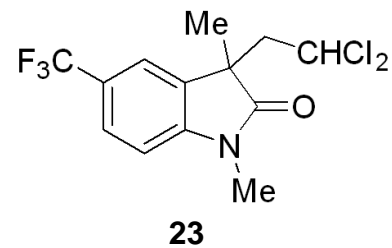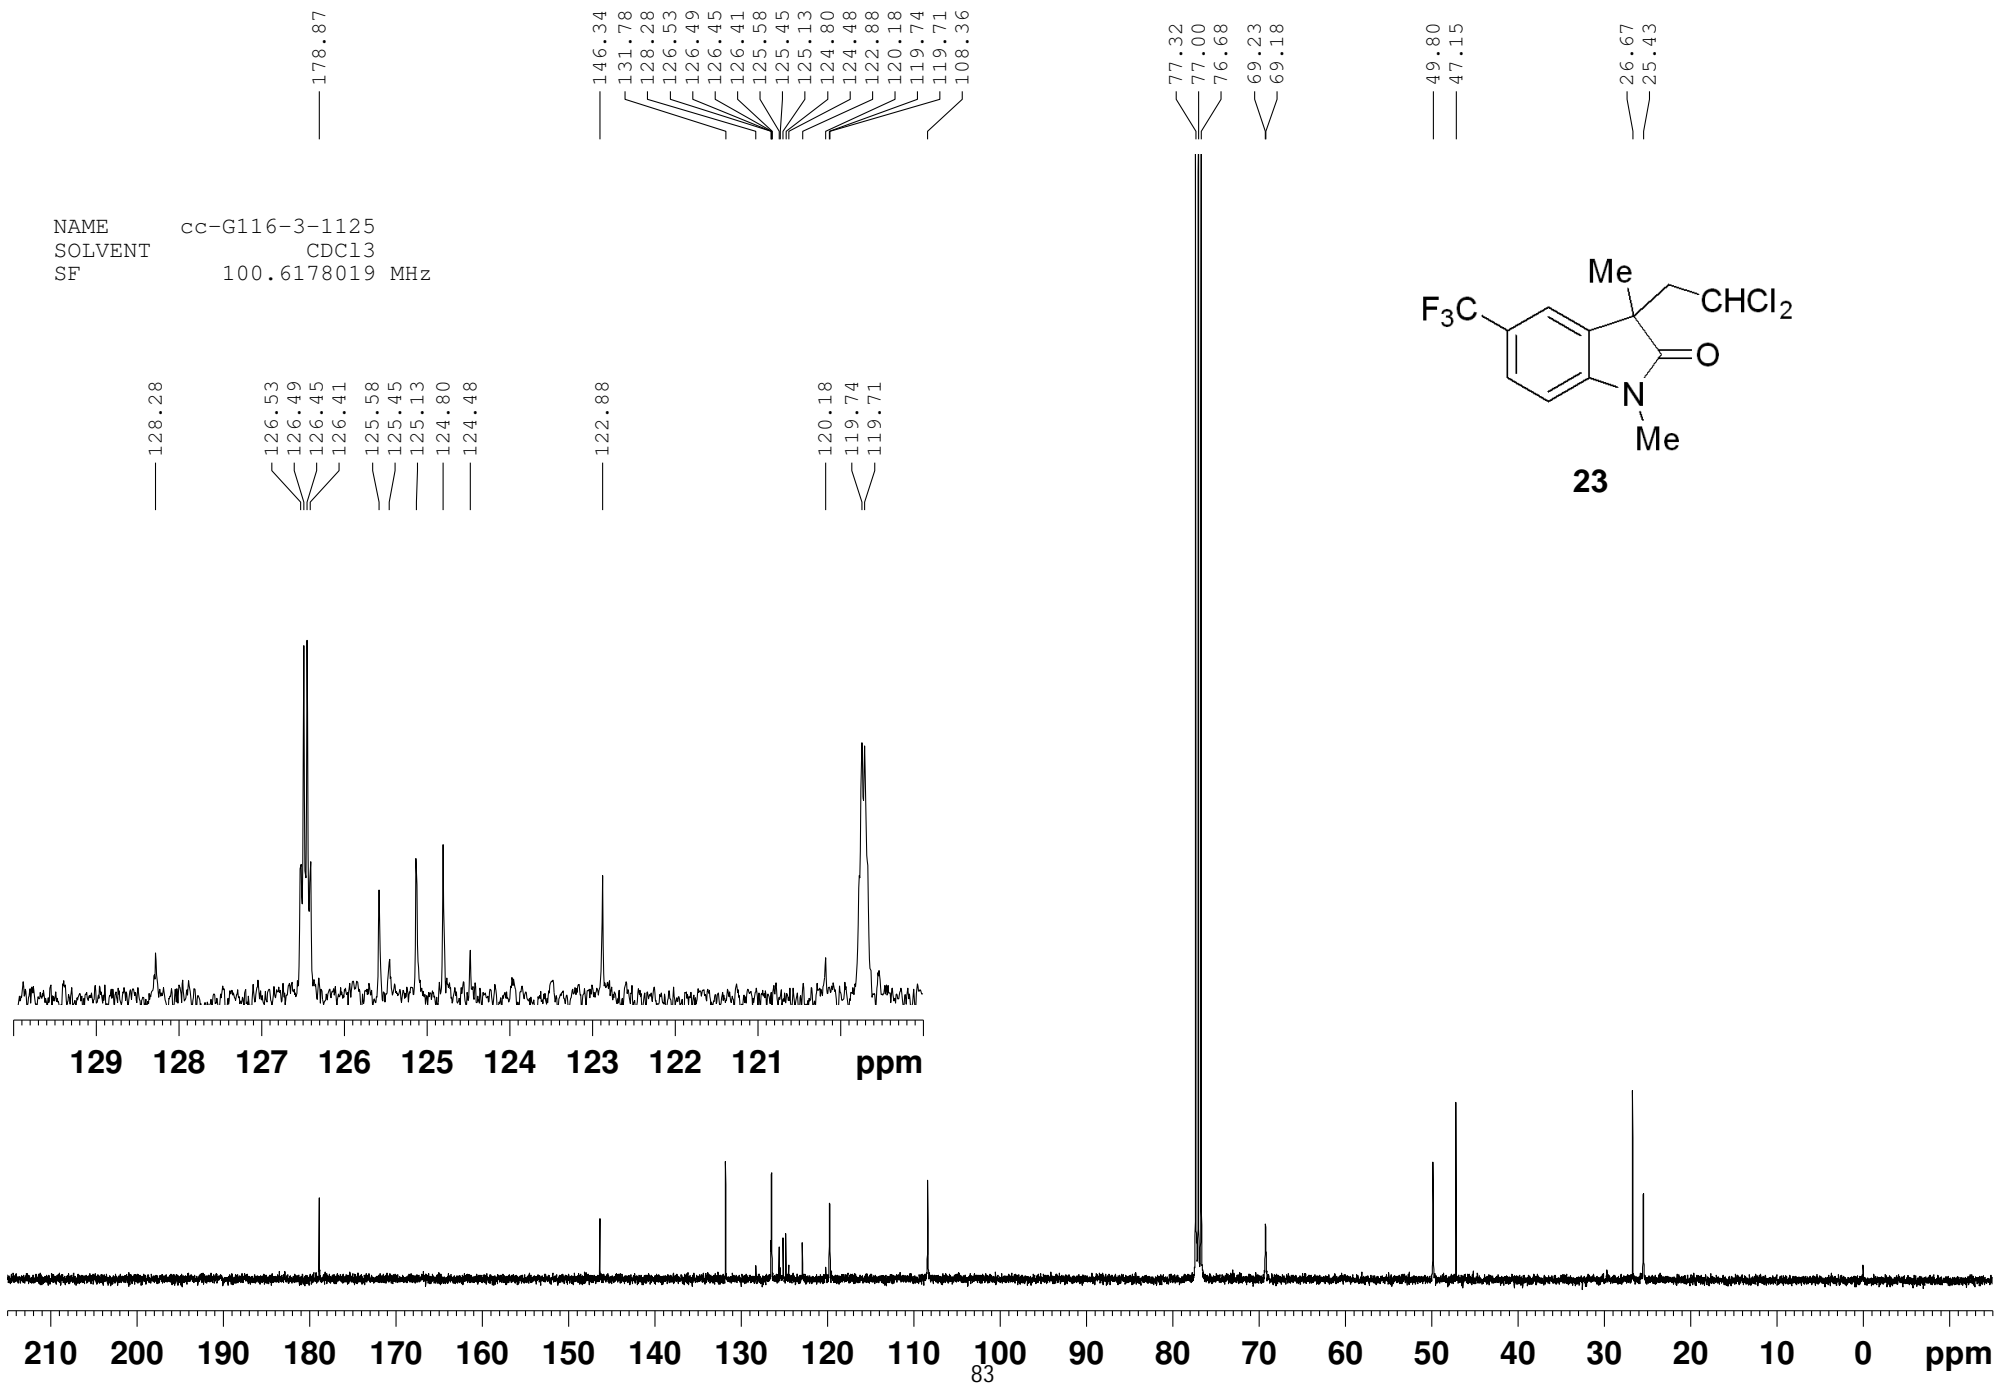

NAME cc-G116-3-1125  
SOLVENT CDCl3  
SF 376.5171850 MHz

— 61.324

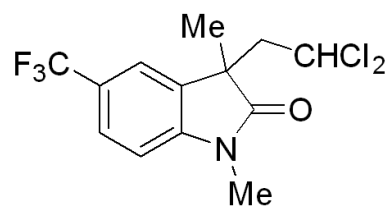

23

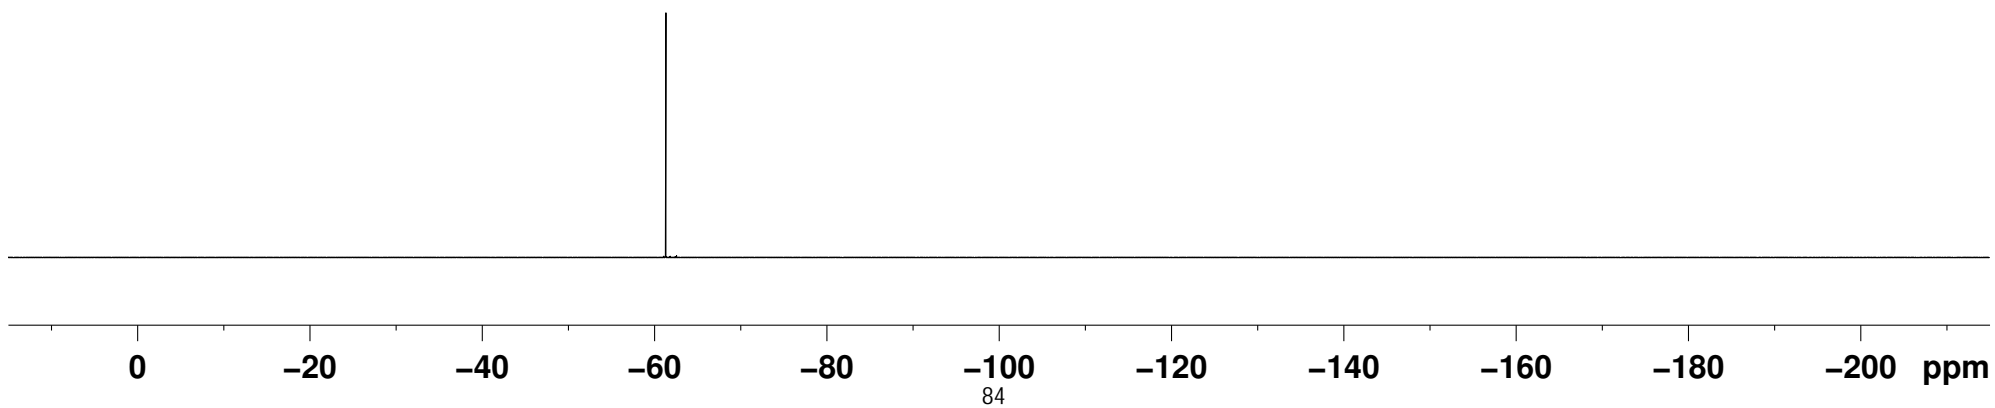

NAME cc-h129-3-0608  
SOLVENT CDCl3  
SF 400.1500070 MHz

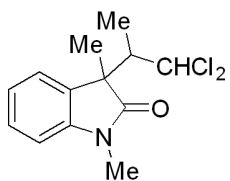

24

7.341  
7.339  
7.322  
7.320  
7.309  
7.300  
7.293  
7.277  
7.273  
7.267  
7.223  
7.205  
7.114  
7.095  
7.076  
7.054  
7.035  
6.880  
6.838  
5.775  
5.768  
5.652  
5.648

3.240  
3.170  
2.819  
2.811  
2.801  
2.794  
2.784  
2.777  
2.767  
2.759  
2.713  
2.710  
2.697  
2.692  
2.680  
2.676  
2.663  
2.659  
1.537  
1.522  
1.505  
1.453  
1.417

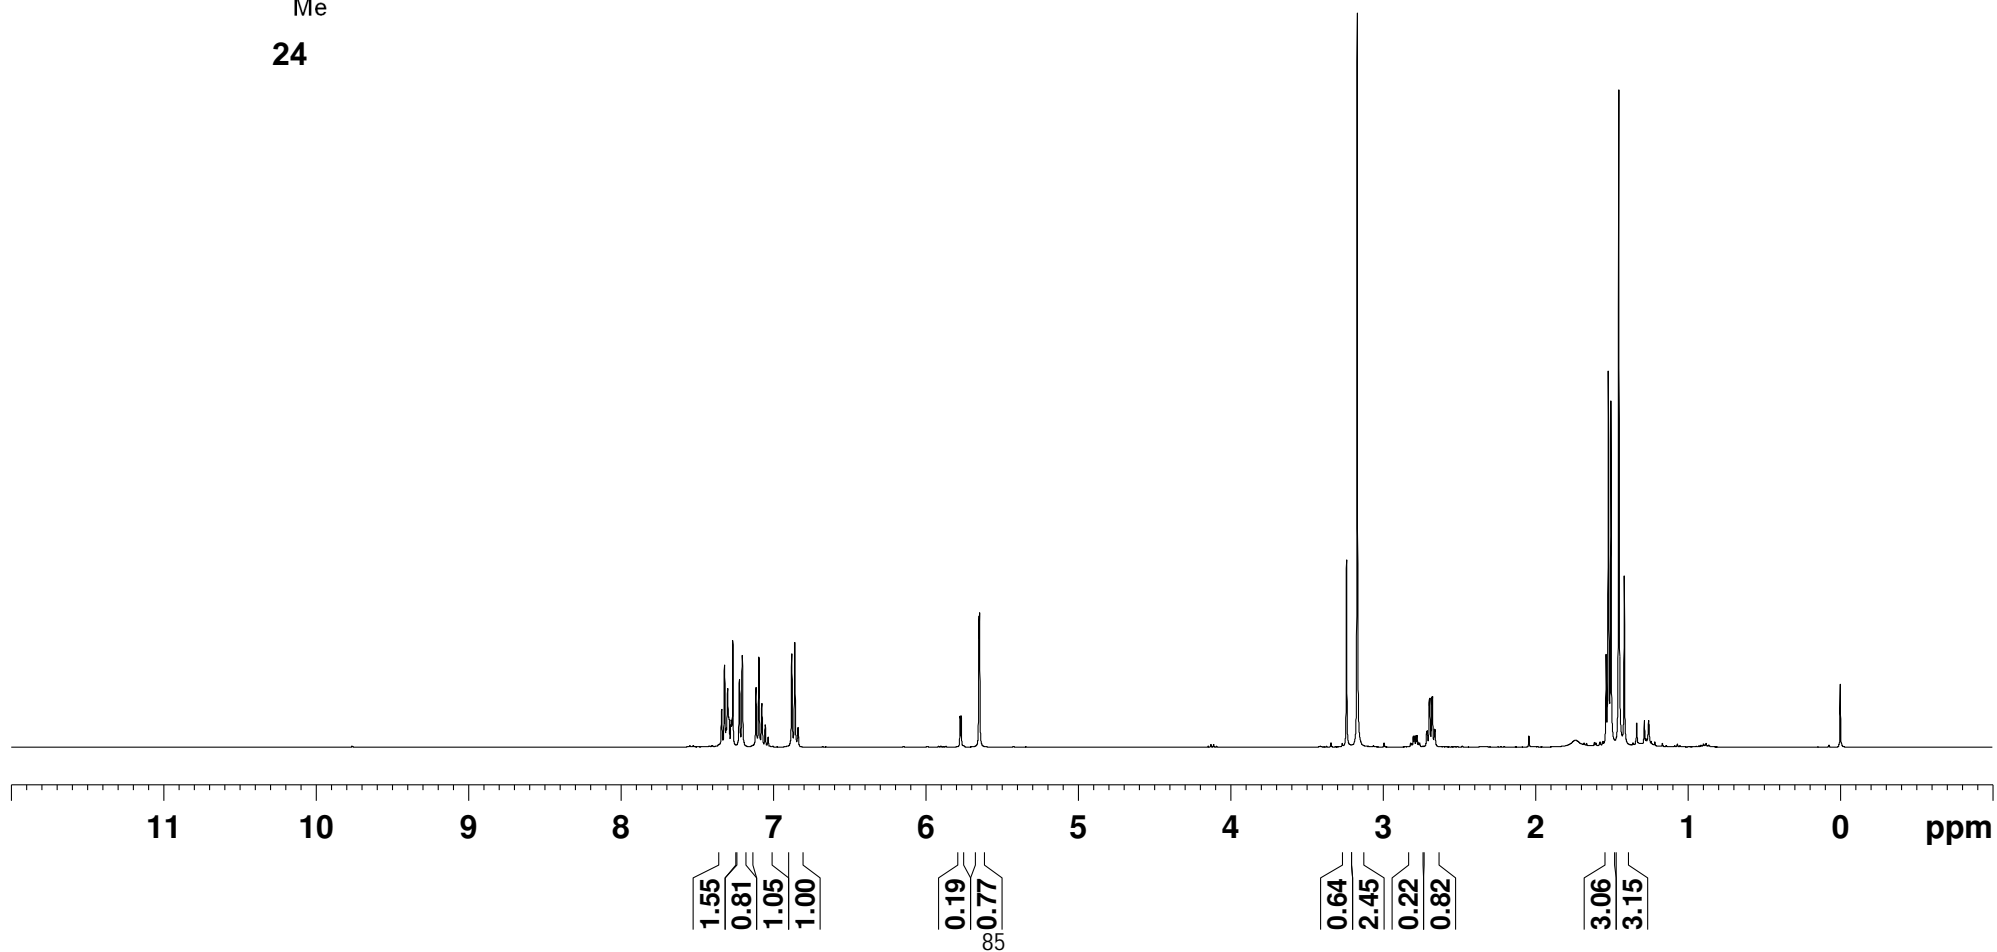

179.31  
177.97

143.15

131.89  
131.02  
128.53  
128.18  
124.32  
122.76  
122.63  
122.47

108.39  
108.34

77.32  
77.00  
76.68  
75.26  
75.00

51.64  
50.58  
49.65  
49.46

26.33  
26.21  
23.51  
22.80

8.96  
7.54

NAME cc-h129-3-0608  
SOLVENT CDCl<sub>3</sub>  
SF 100.6178030 MHz

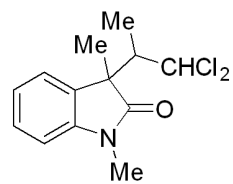

24

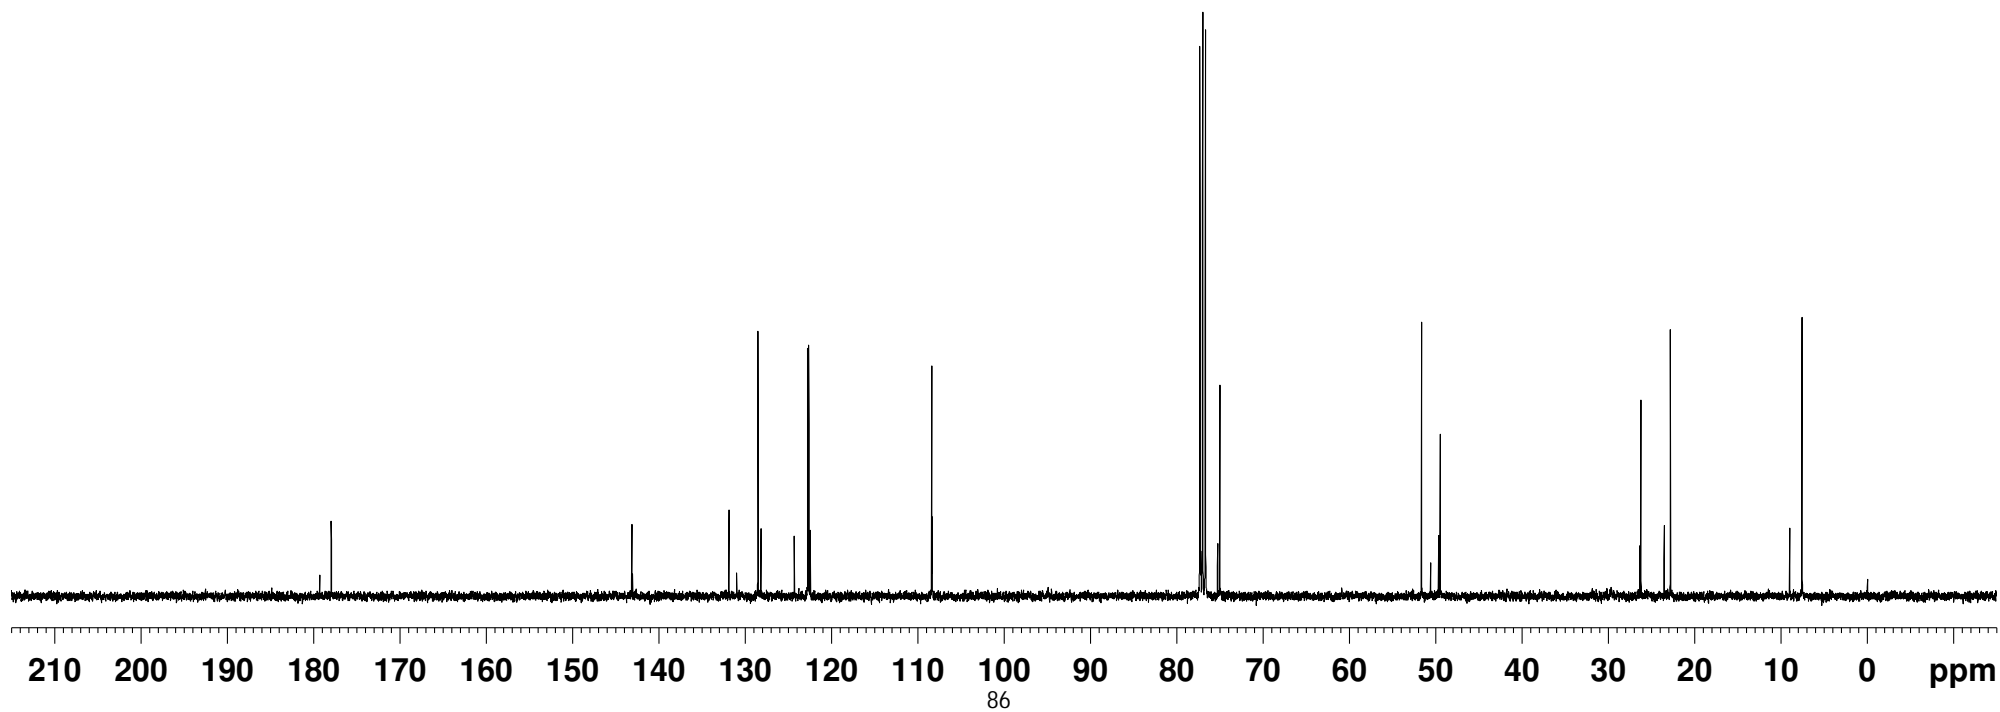

NAME cc-h163-up  
SOLVENT CDCl3  
SF 400.1500096 MHz

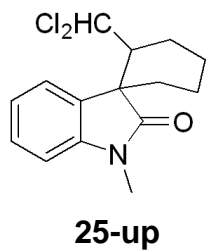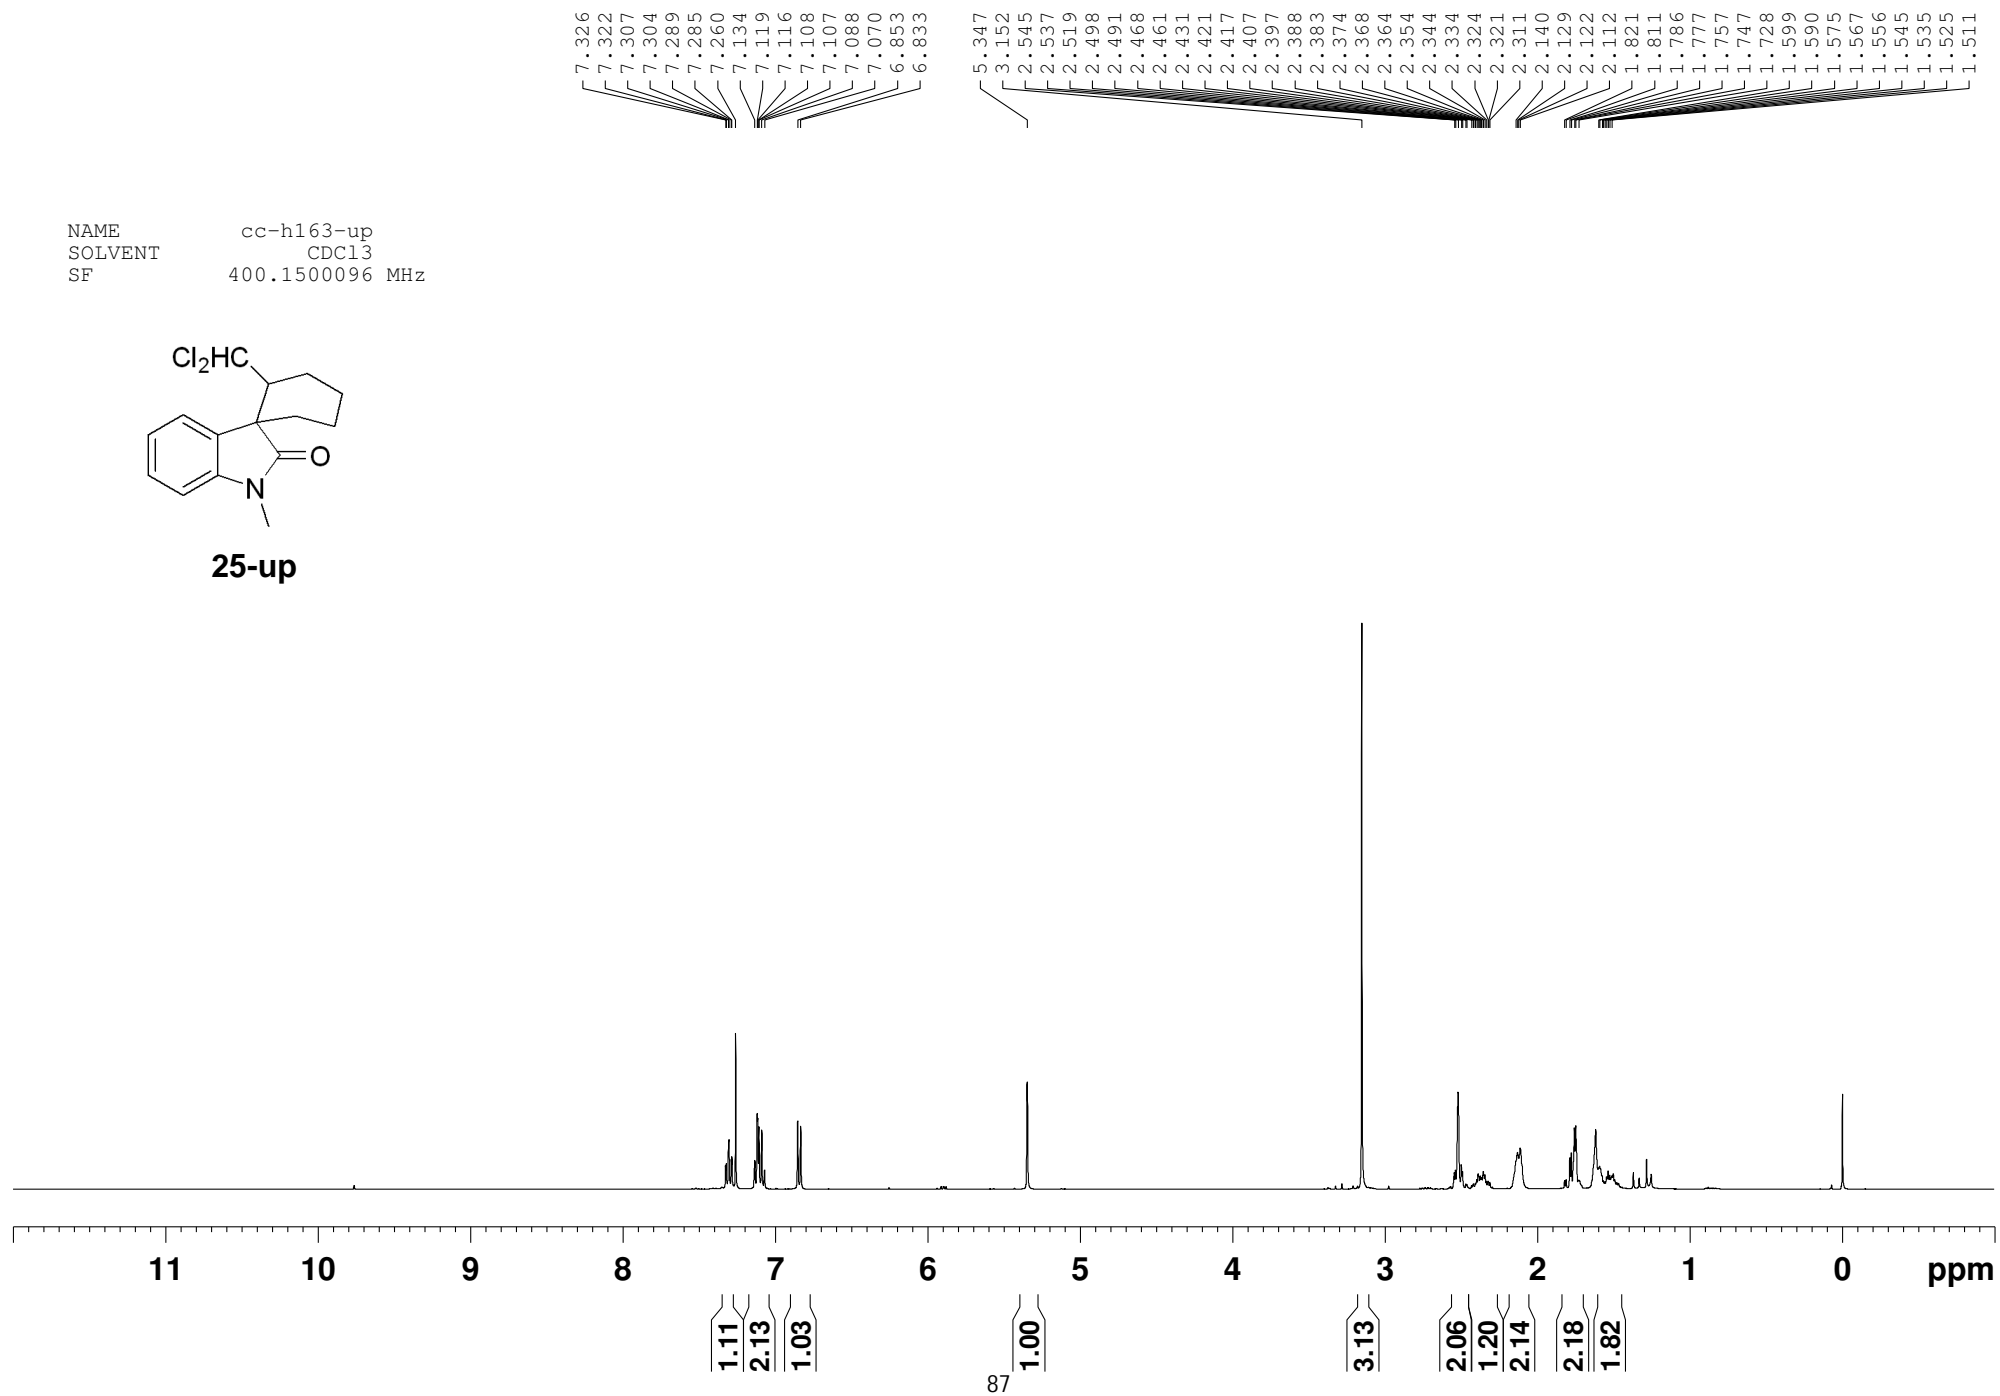

— 177.05

— 143.28

— 131.81

— 128.46

— 122.65

— 121.60

— 108.13

77.32

77.00

76.68

73.85

— 55.80

— 49.31

— 36.57

26.06

25.50

20.08

19.25

NAME cc-h163-up  
SOLVENT CDCl<sub>3</sub>  
SF 100.6178008 MHz

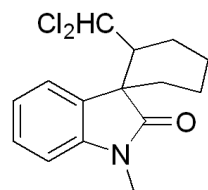

25-up

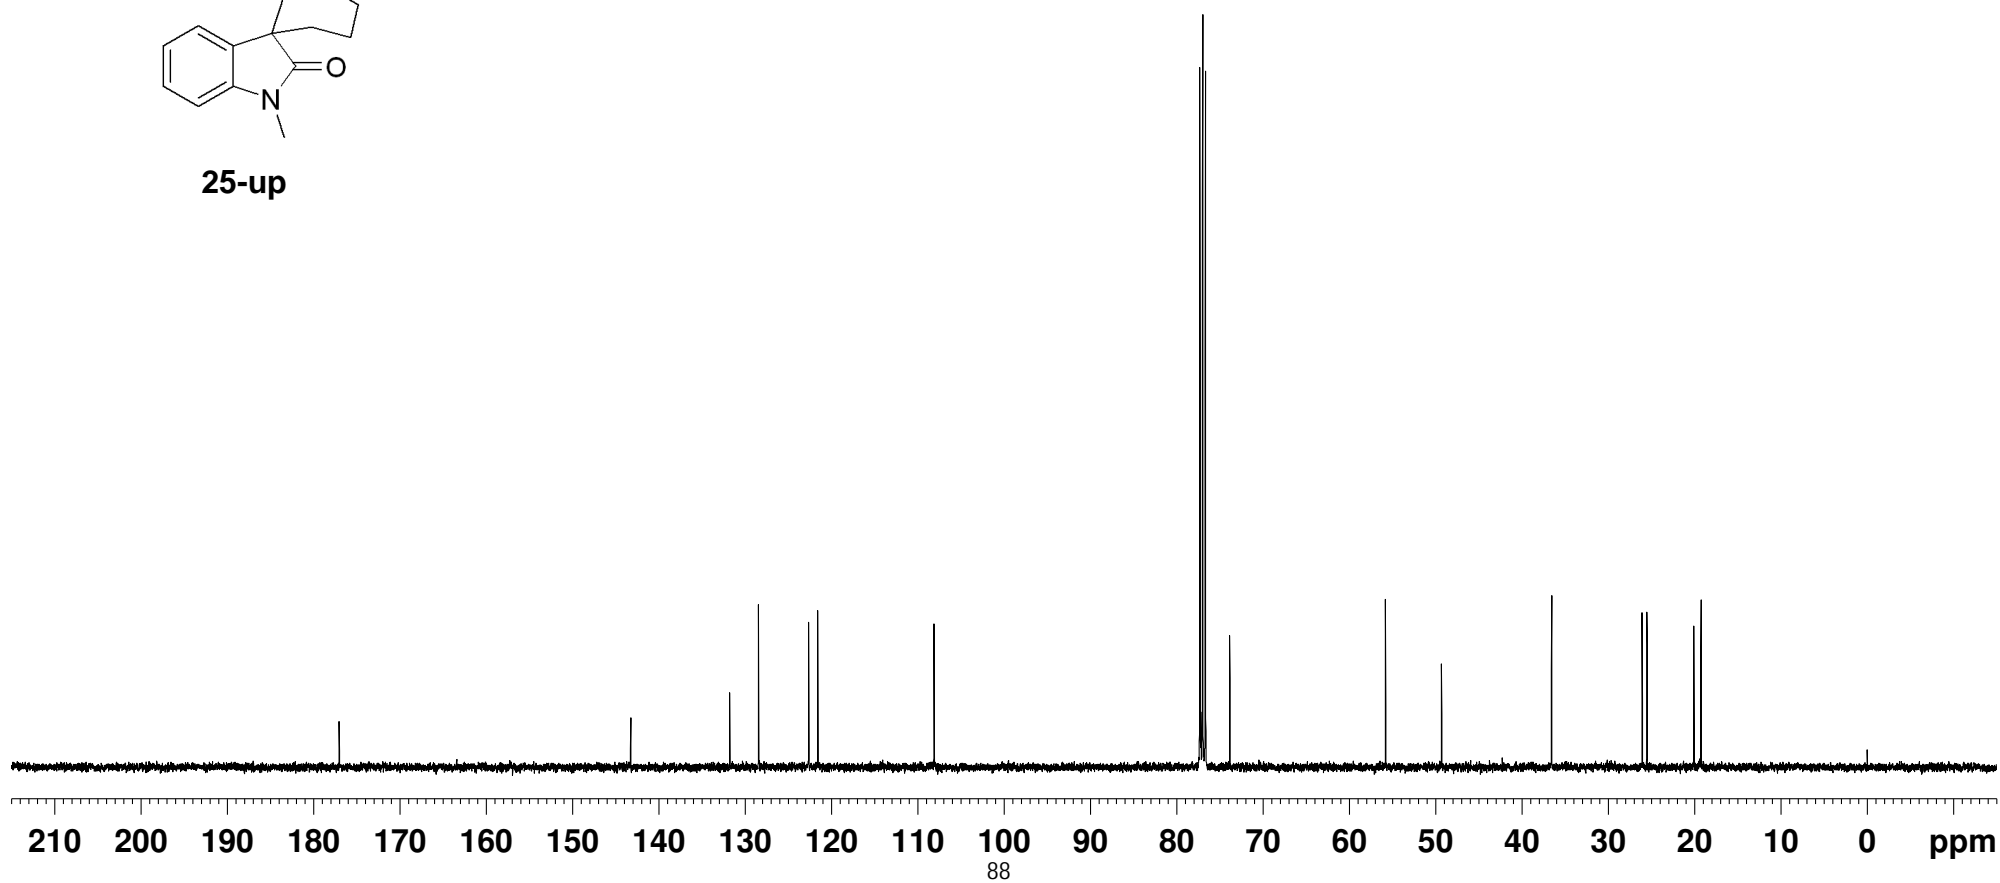



NAME cc-h163-down  
SOLVENT CDCl3  
SF 400.1500096 MHz

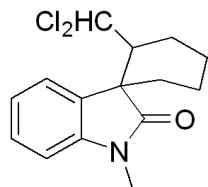

25-down

7.519  
7.500  
7.352  
7.332  
7.313  
7.260  
7.063  
7.044  
7.026  
6.905  
6.886

5.244  
5.228  
3.226  
2.831  
2.821  
2.816  
2.806  
2.800  
2.790  
2.785  
2.775  
2.407  
2.398  
2.390  
2.382  
2.373  
2.364  
2.356  
2.110  
2.106  
2.076  
1.953  
1.940  
1.921  
1.909  
1.894  
1.889  
1.877  
1.849  
1.839  
1.816  
1.807  
1.783  
1.774  
1.760  
1.752  
1.742  
1.735  
1.728  
1.705  
1.697  
1.689  
1.663  
1.656  
1.646  
1.475

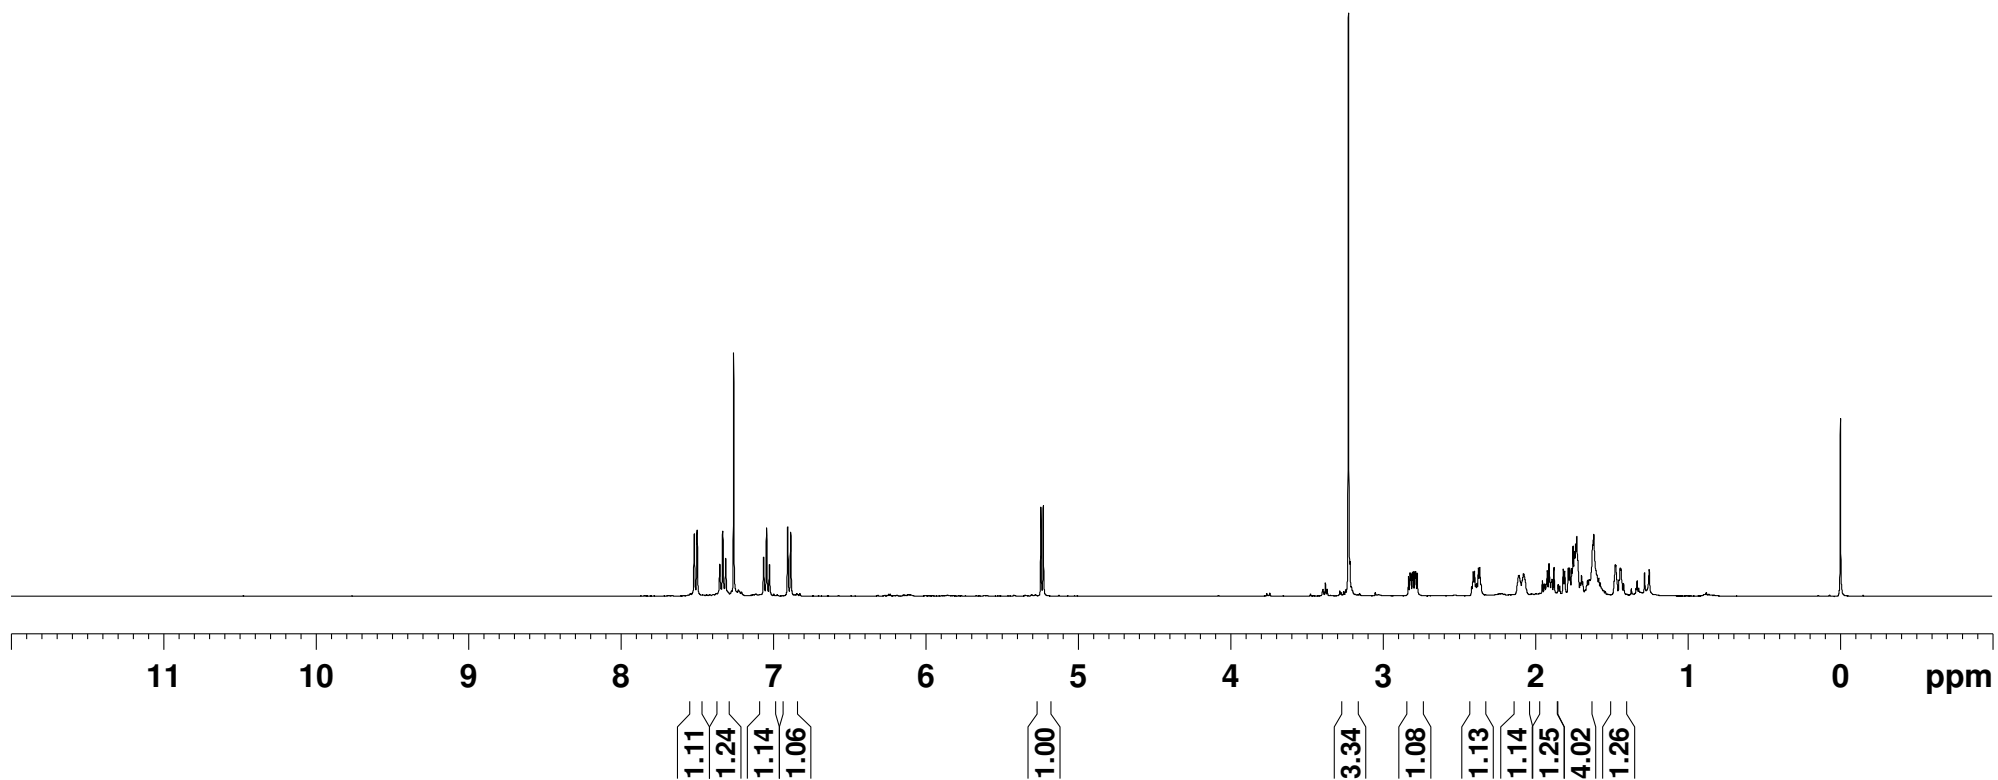

179.64  
143.35  
130.03  
128.19  
125.67  
121.84  
108.59  
77.32  
77.00  
76.68  
75.07  
51.53  
51.47  
36.57  
26.63  
24.91  
24.55  
20.85

NAME cc-h163-down  
SOLVENT CDCl3  
SF 100.6178004 MHz

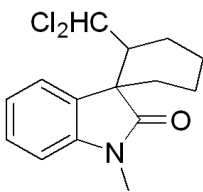

25-down

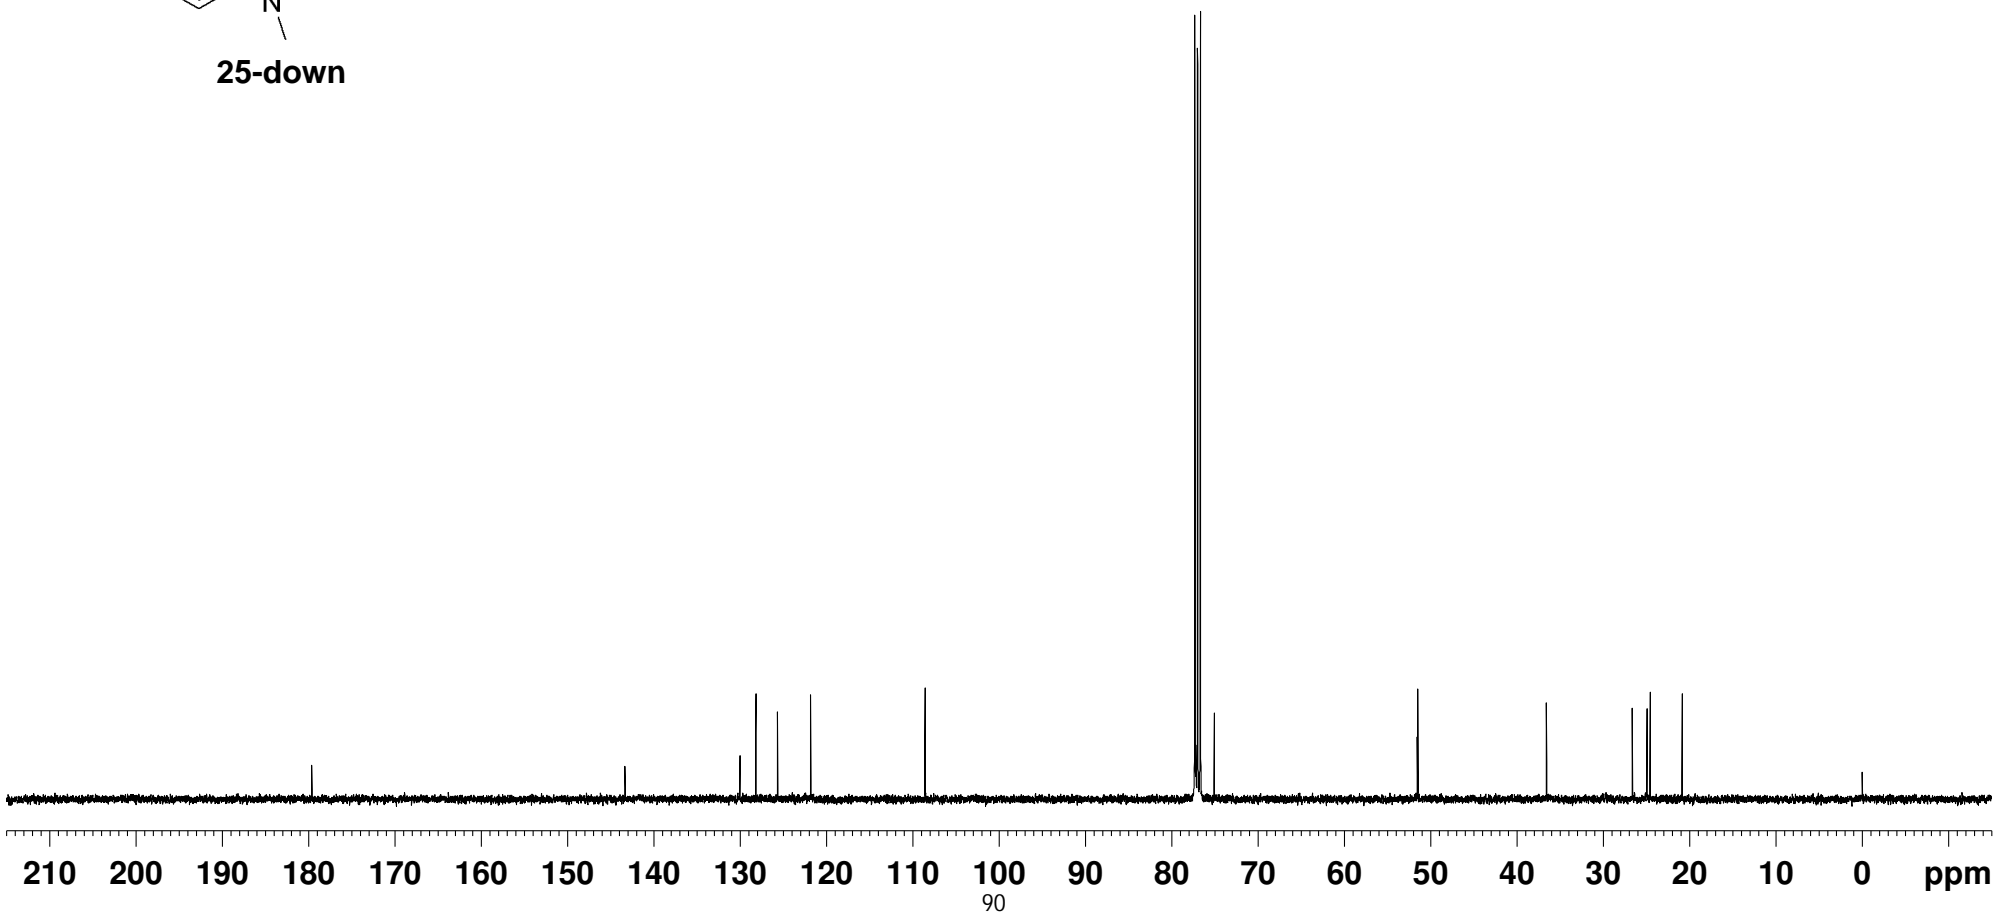

NAME CC-I120  
SOLVENT CDCl3  
SF 400.1500095 MHz

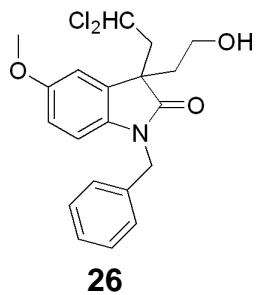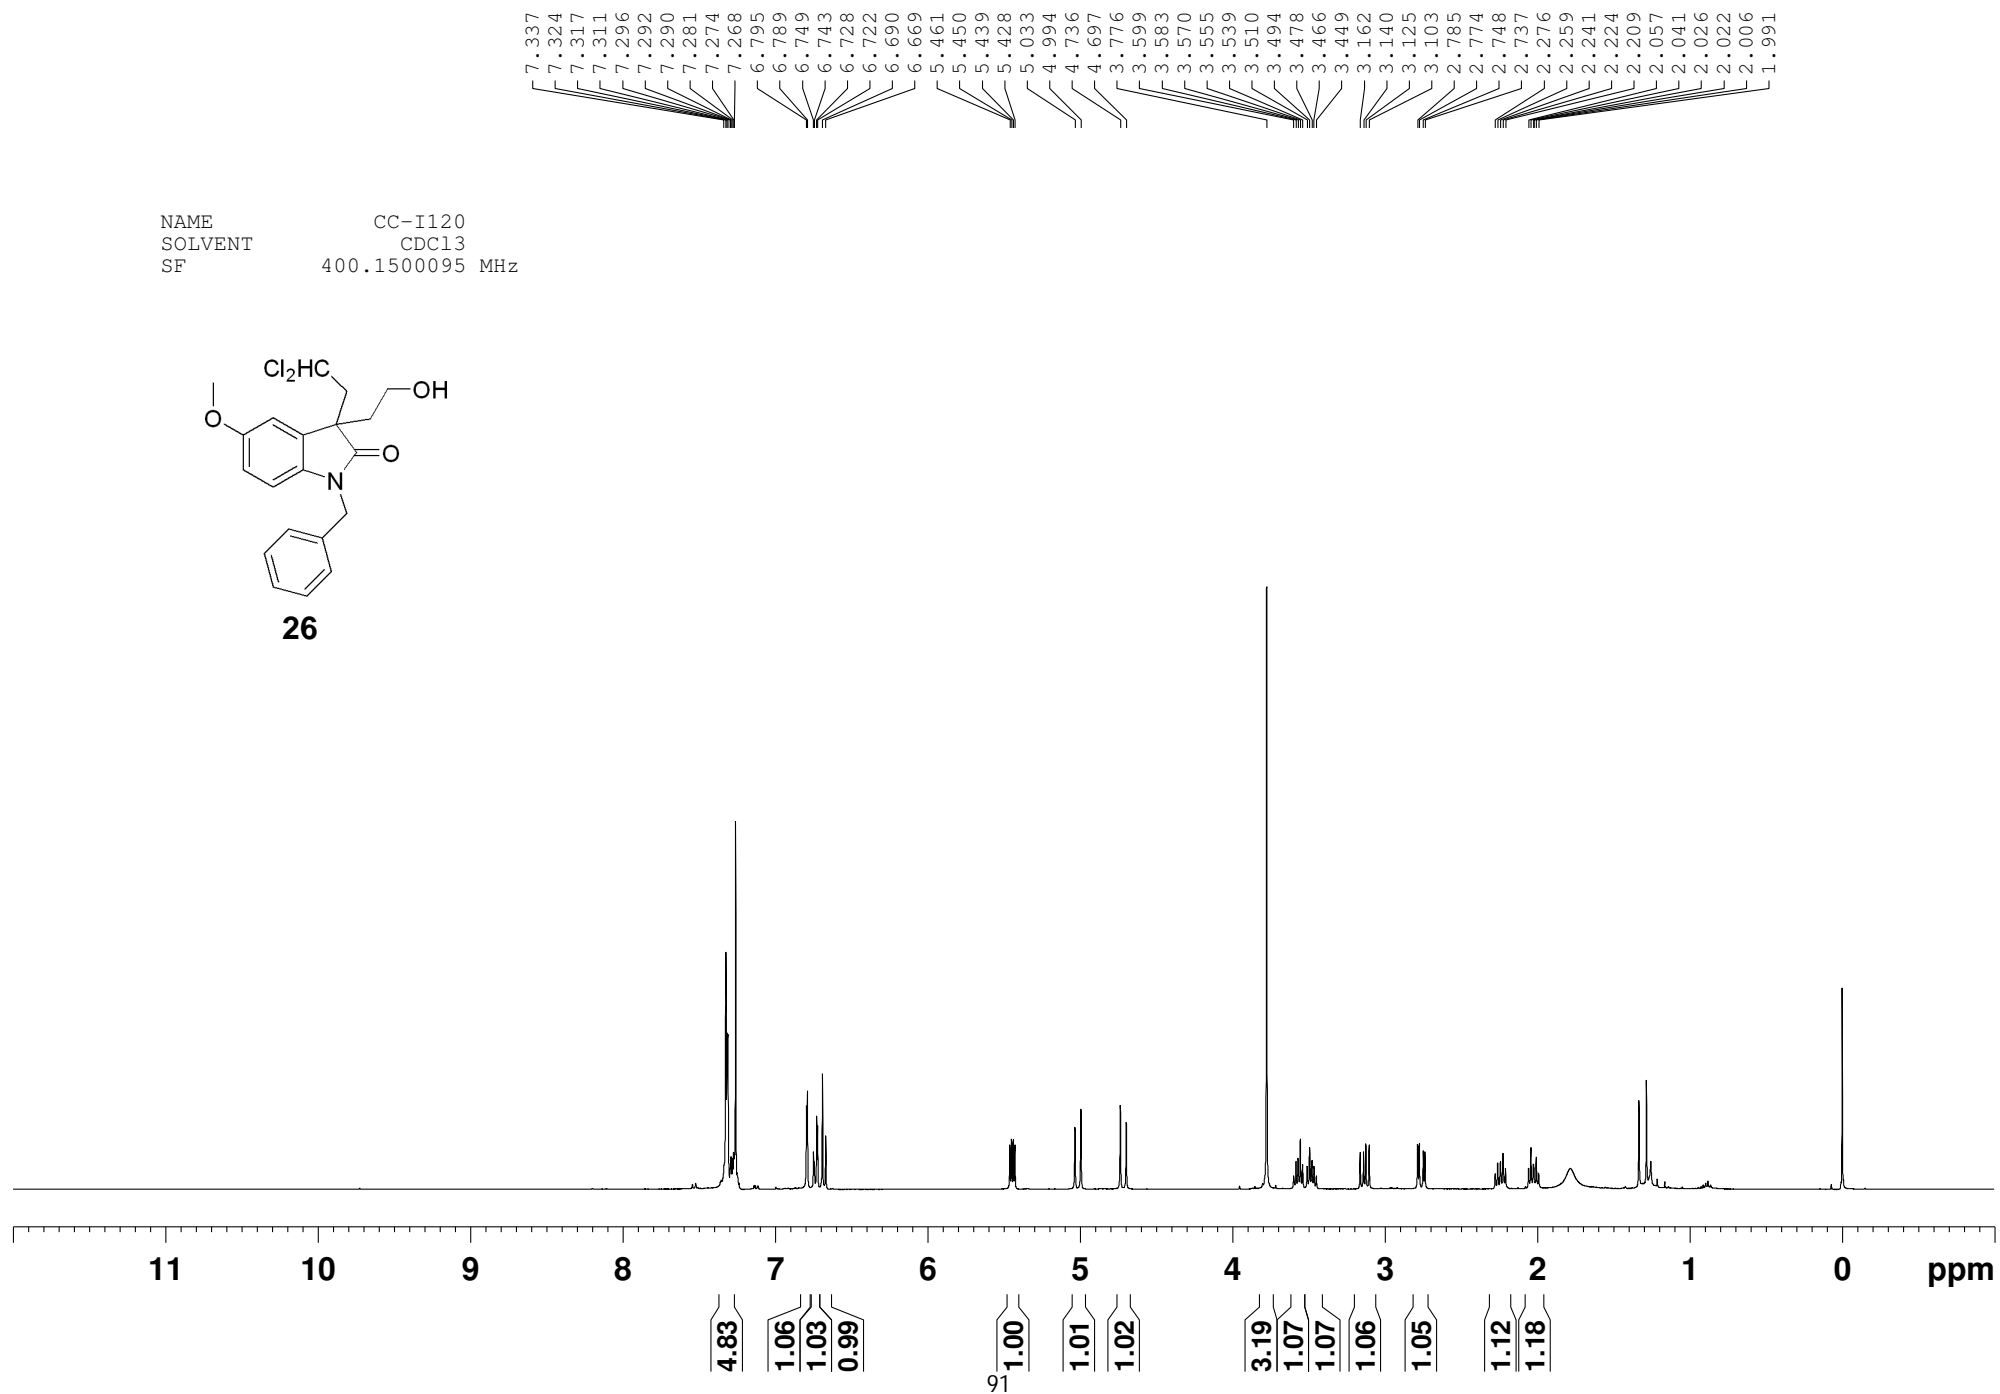

— 178.57

— 156.18

136.55  
135.56  
130.57  
128.75  
127.72  
127.59

112.64  
110.79  
110.23

77.32  
77.00  
76.68  
69.24

58.52  
55.76  
50.29  
49.76  
44.51  
41.64

NAME CC-1120  
SOLVENT CDCl3  
SF 100.6178001 MHz

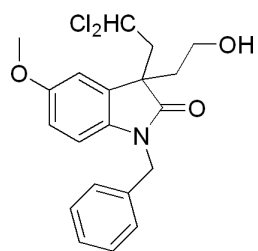

**26**

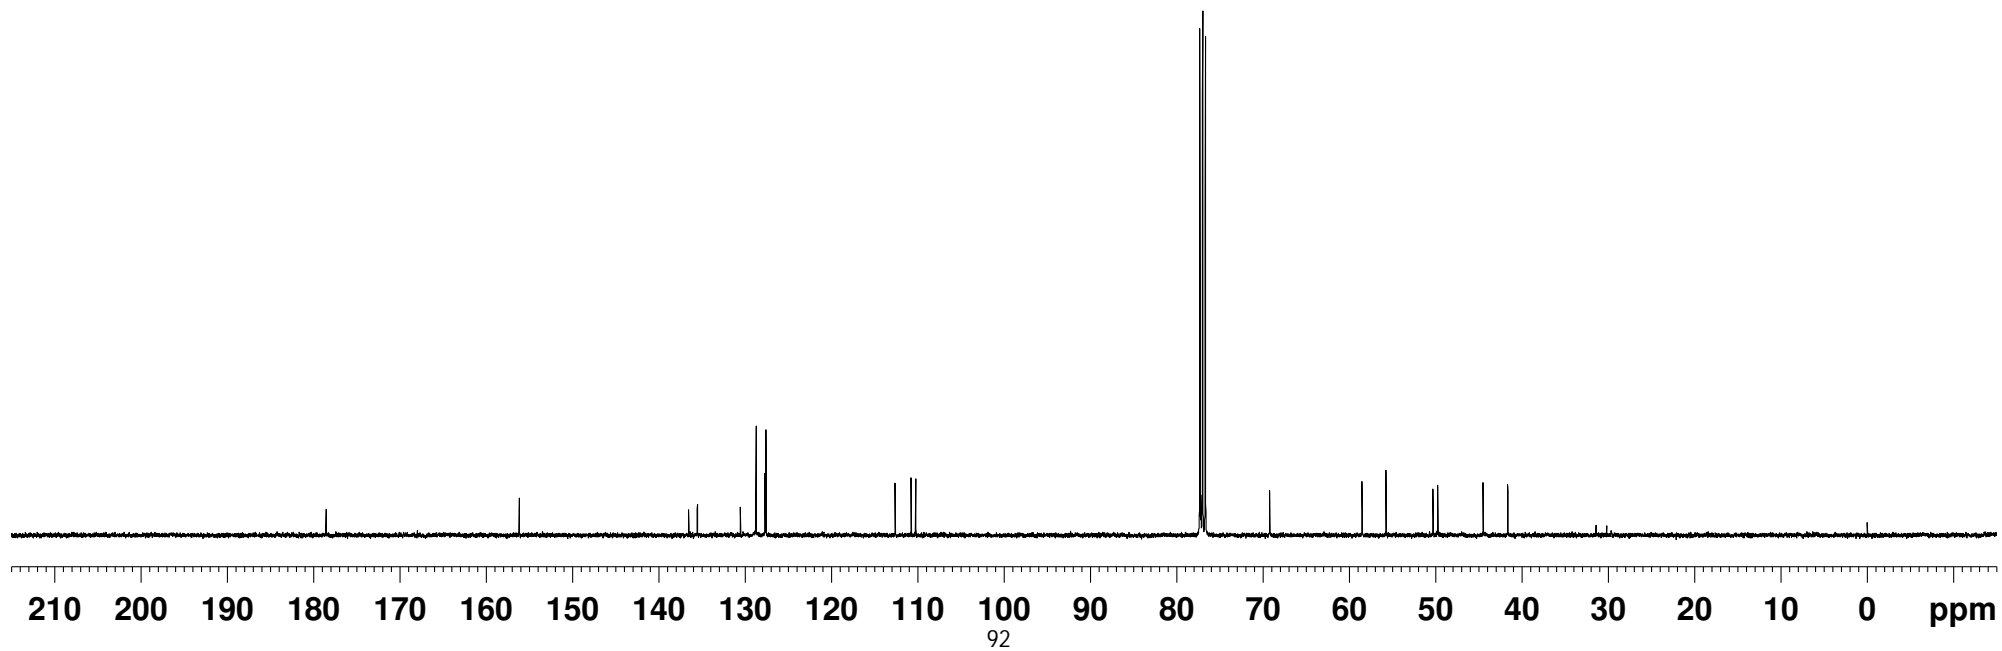

NAME cc-I27-0709  
SOLVENT CDCl3  
SF 400.1500091 MHz

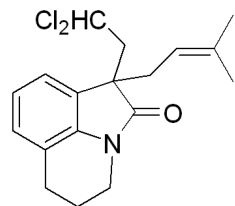

27

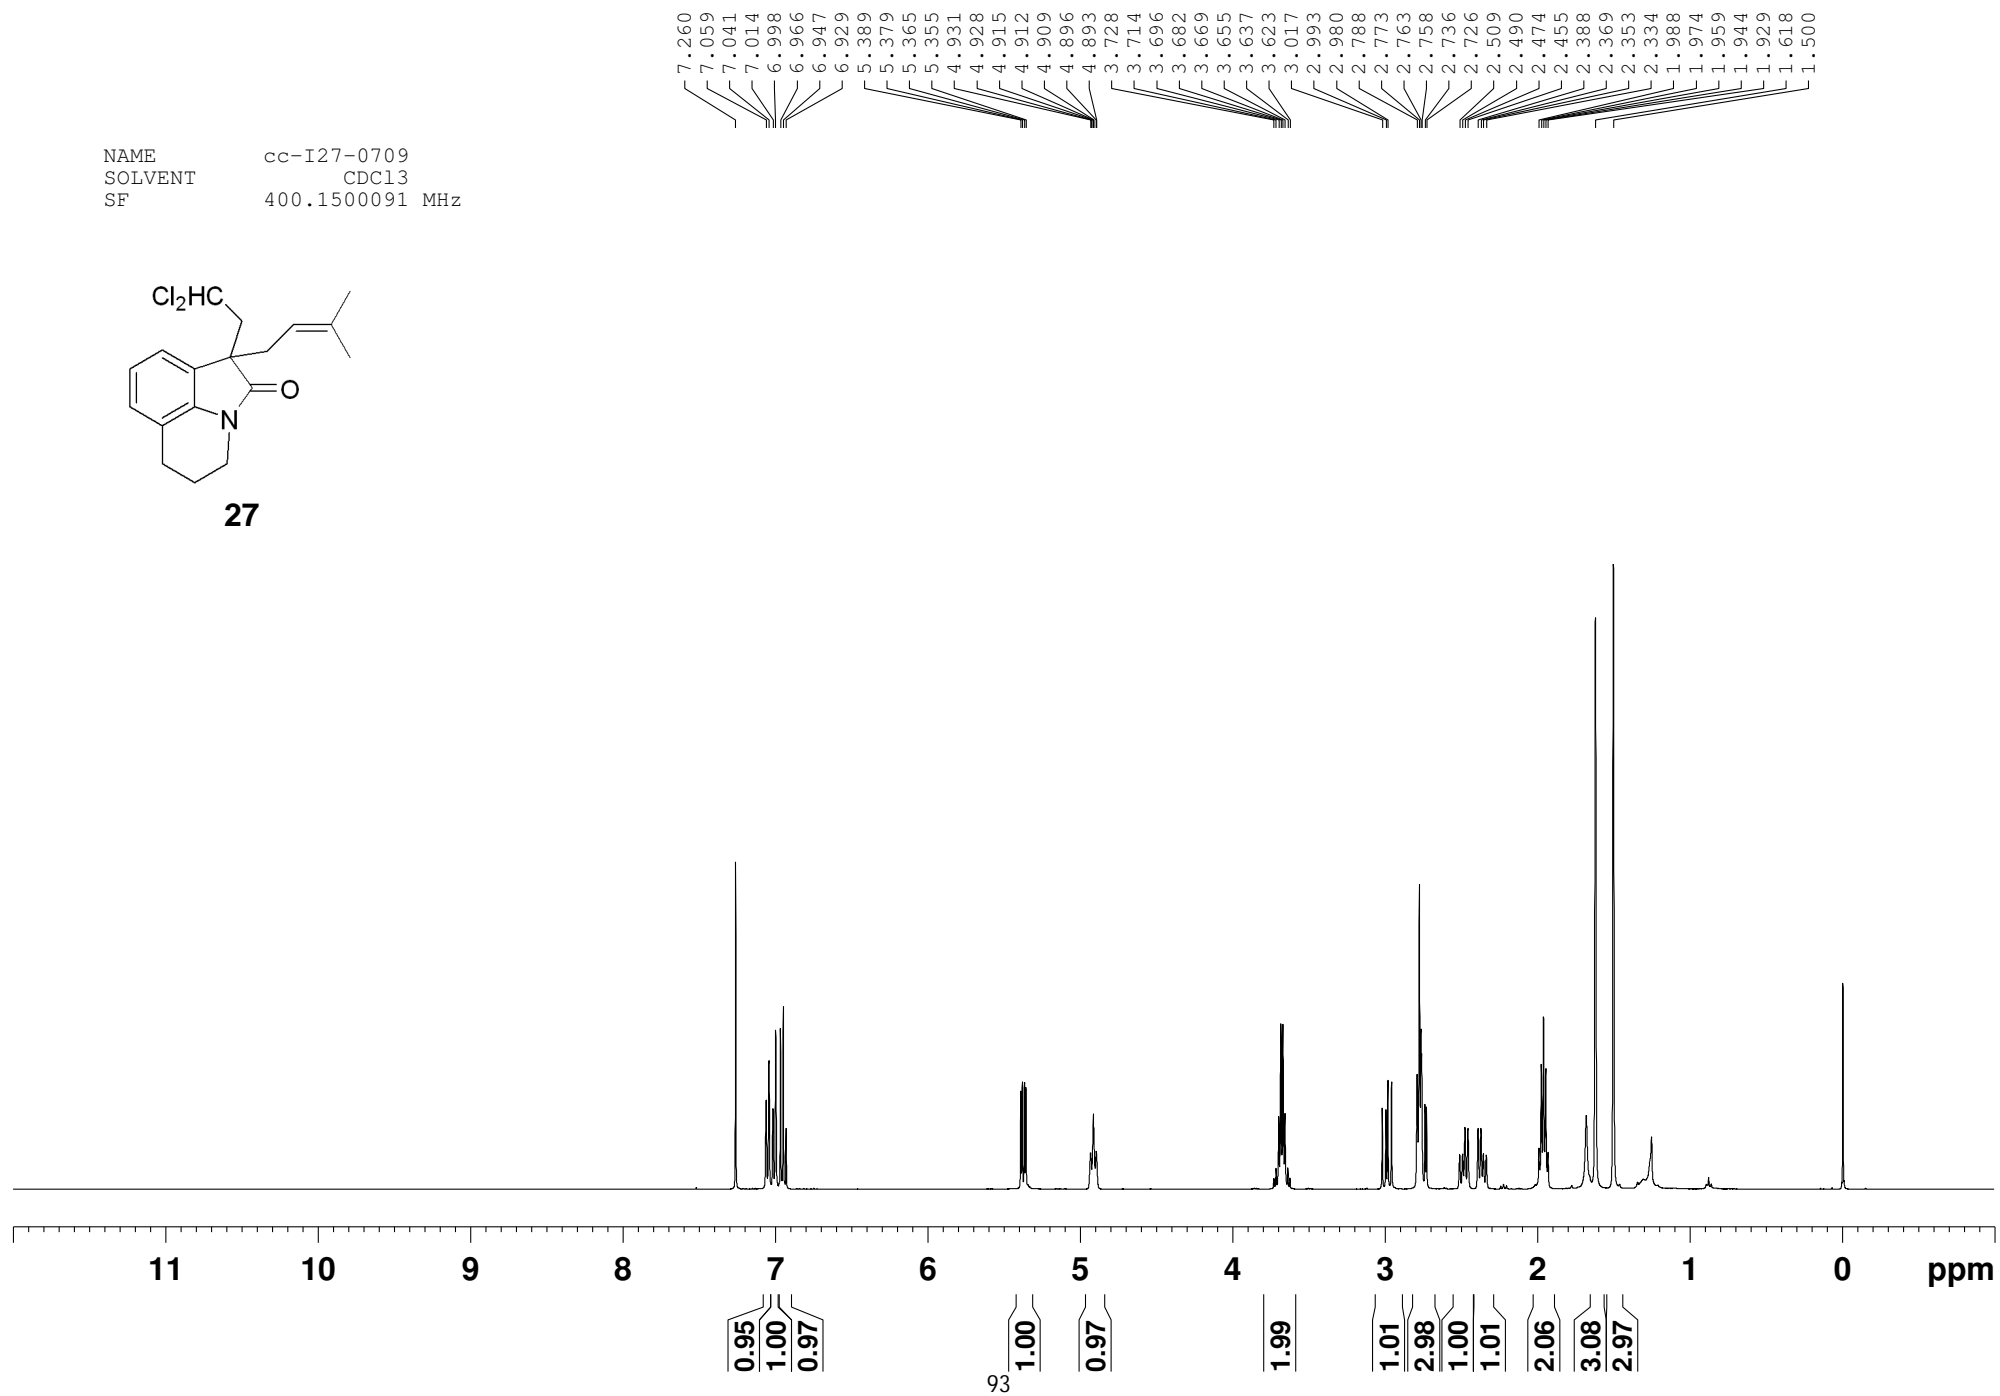

— 177.27

— 139.77  
— 136.55

127.61  
127.28  
121.73  
121.30  
120.44  
116.84

77.32  
77.00  
76.68  
— 70.18

— 52.82  
— 48.03

— 38.97  
— 36.94

25.89  
24.68  
21.11  
— 18.05

NAME cc-I27-0709  
SOLVENT CDC13  
SF 100.6178008 MHz

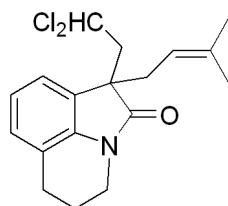

**27**

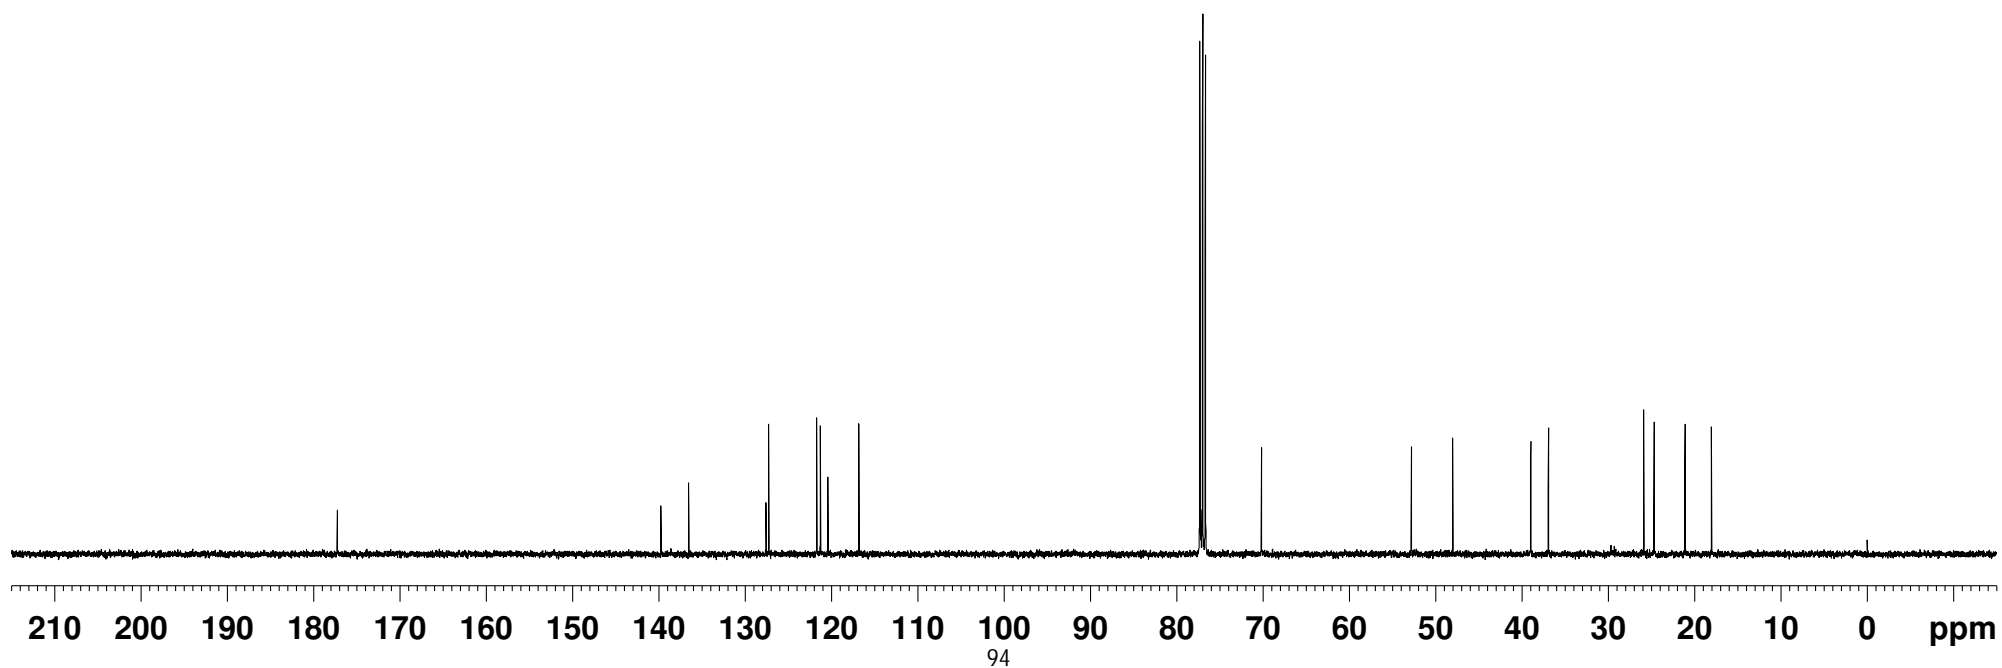

NAME cc-h6-3-0608  
SOLVENT CDCl3  
SF 400.150098 MHz

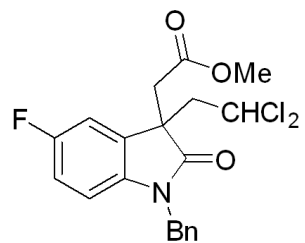

28

7.370  
7.349  
7.331  
7.312  
7.292  
7.275  
7.260  
7.082  
7.075  
7.062  
7.056  
6.939  
6.932  
6.917  
6.910  
6.894  
6.888  
6.698  
6.688  
6.676  
6.666  
5.527  
5.514  
5.507  
5.494  
5.026  
4.986  
4.832  
4.793  
3.507  
3.027  
3.007  
2.990  
2.970  
2.947  
2.939  
2.915  
2.902

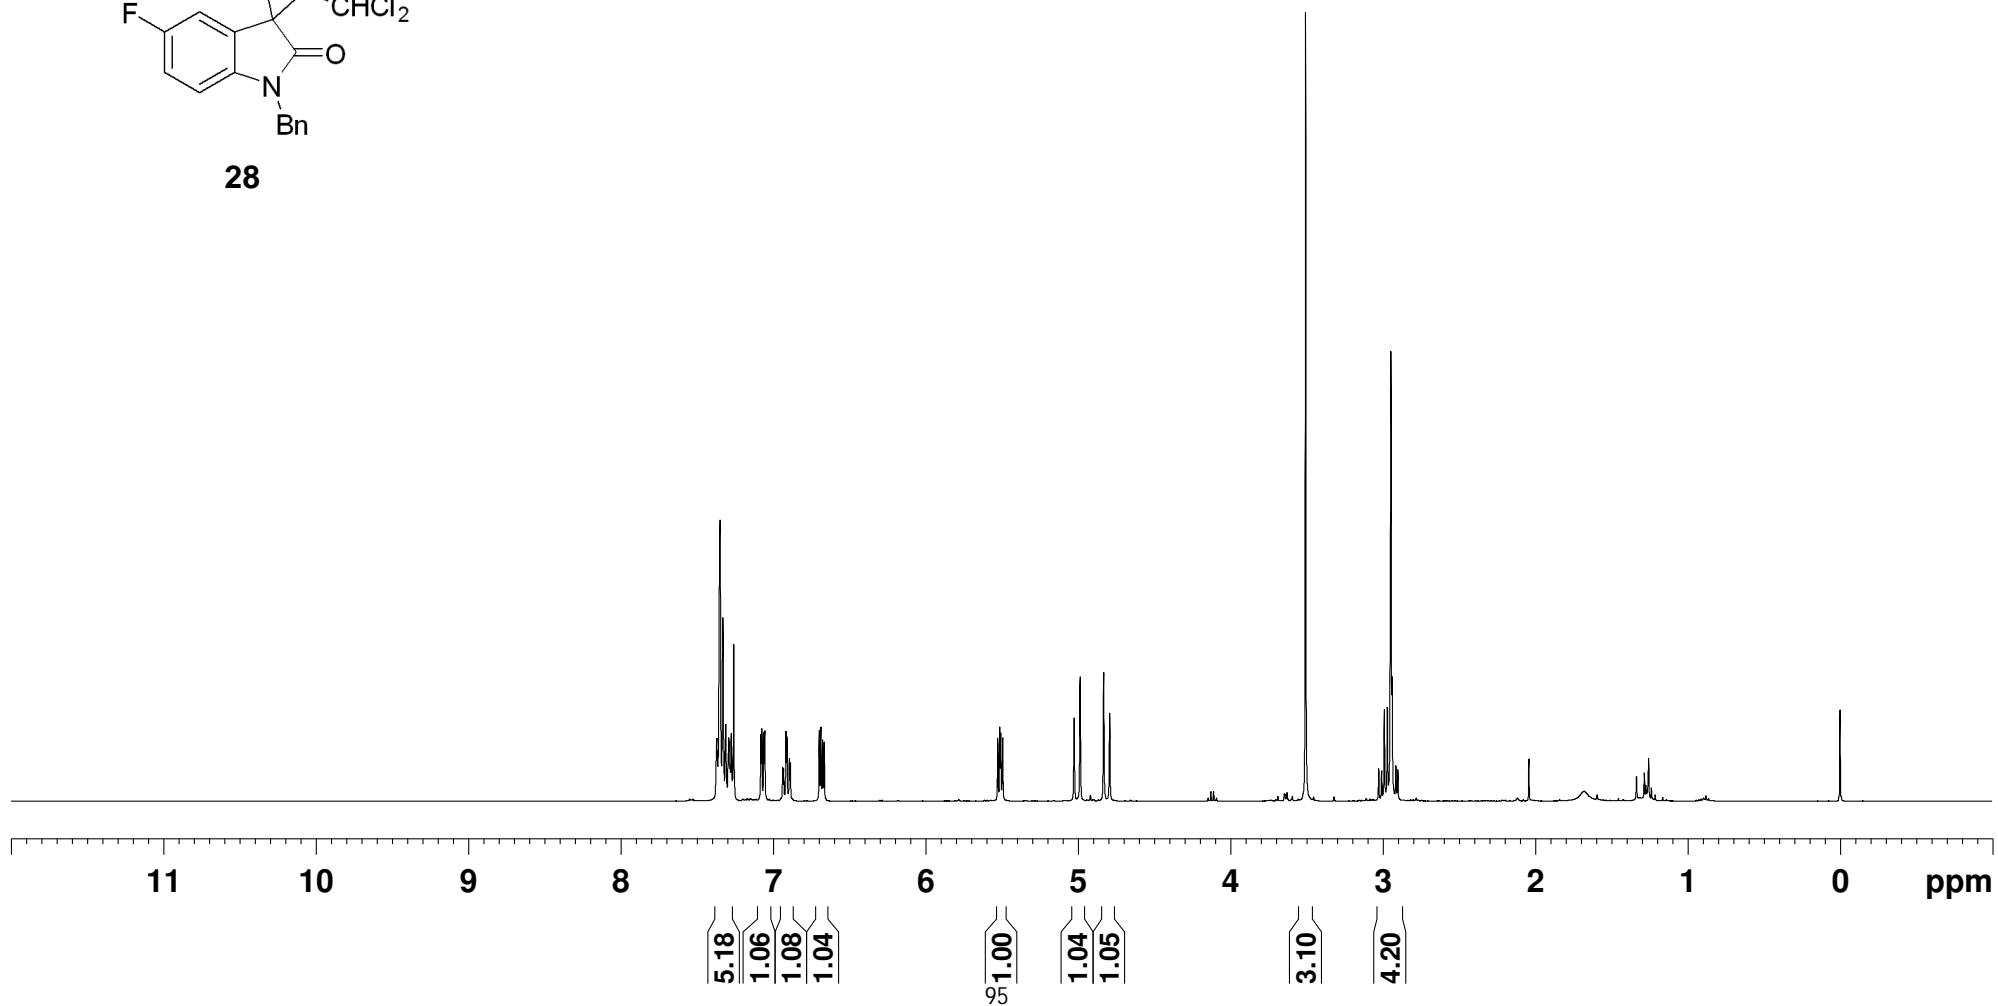

NAME cc-h6-3-0609  
SOLVENT CDCl3  
SF 100.6178030 MHz

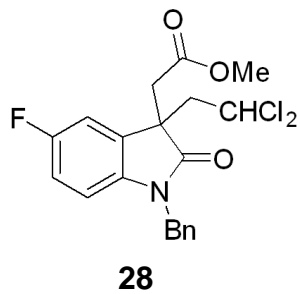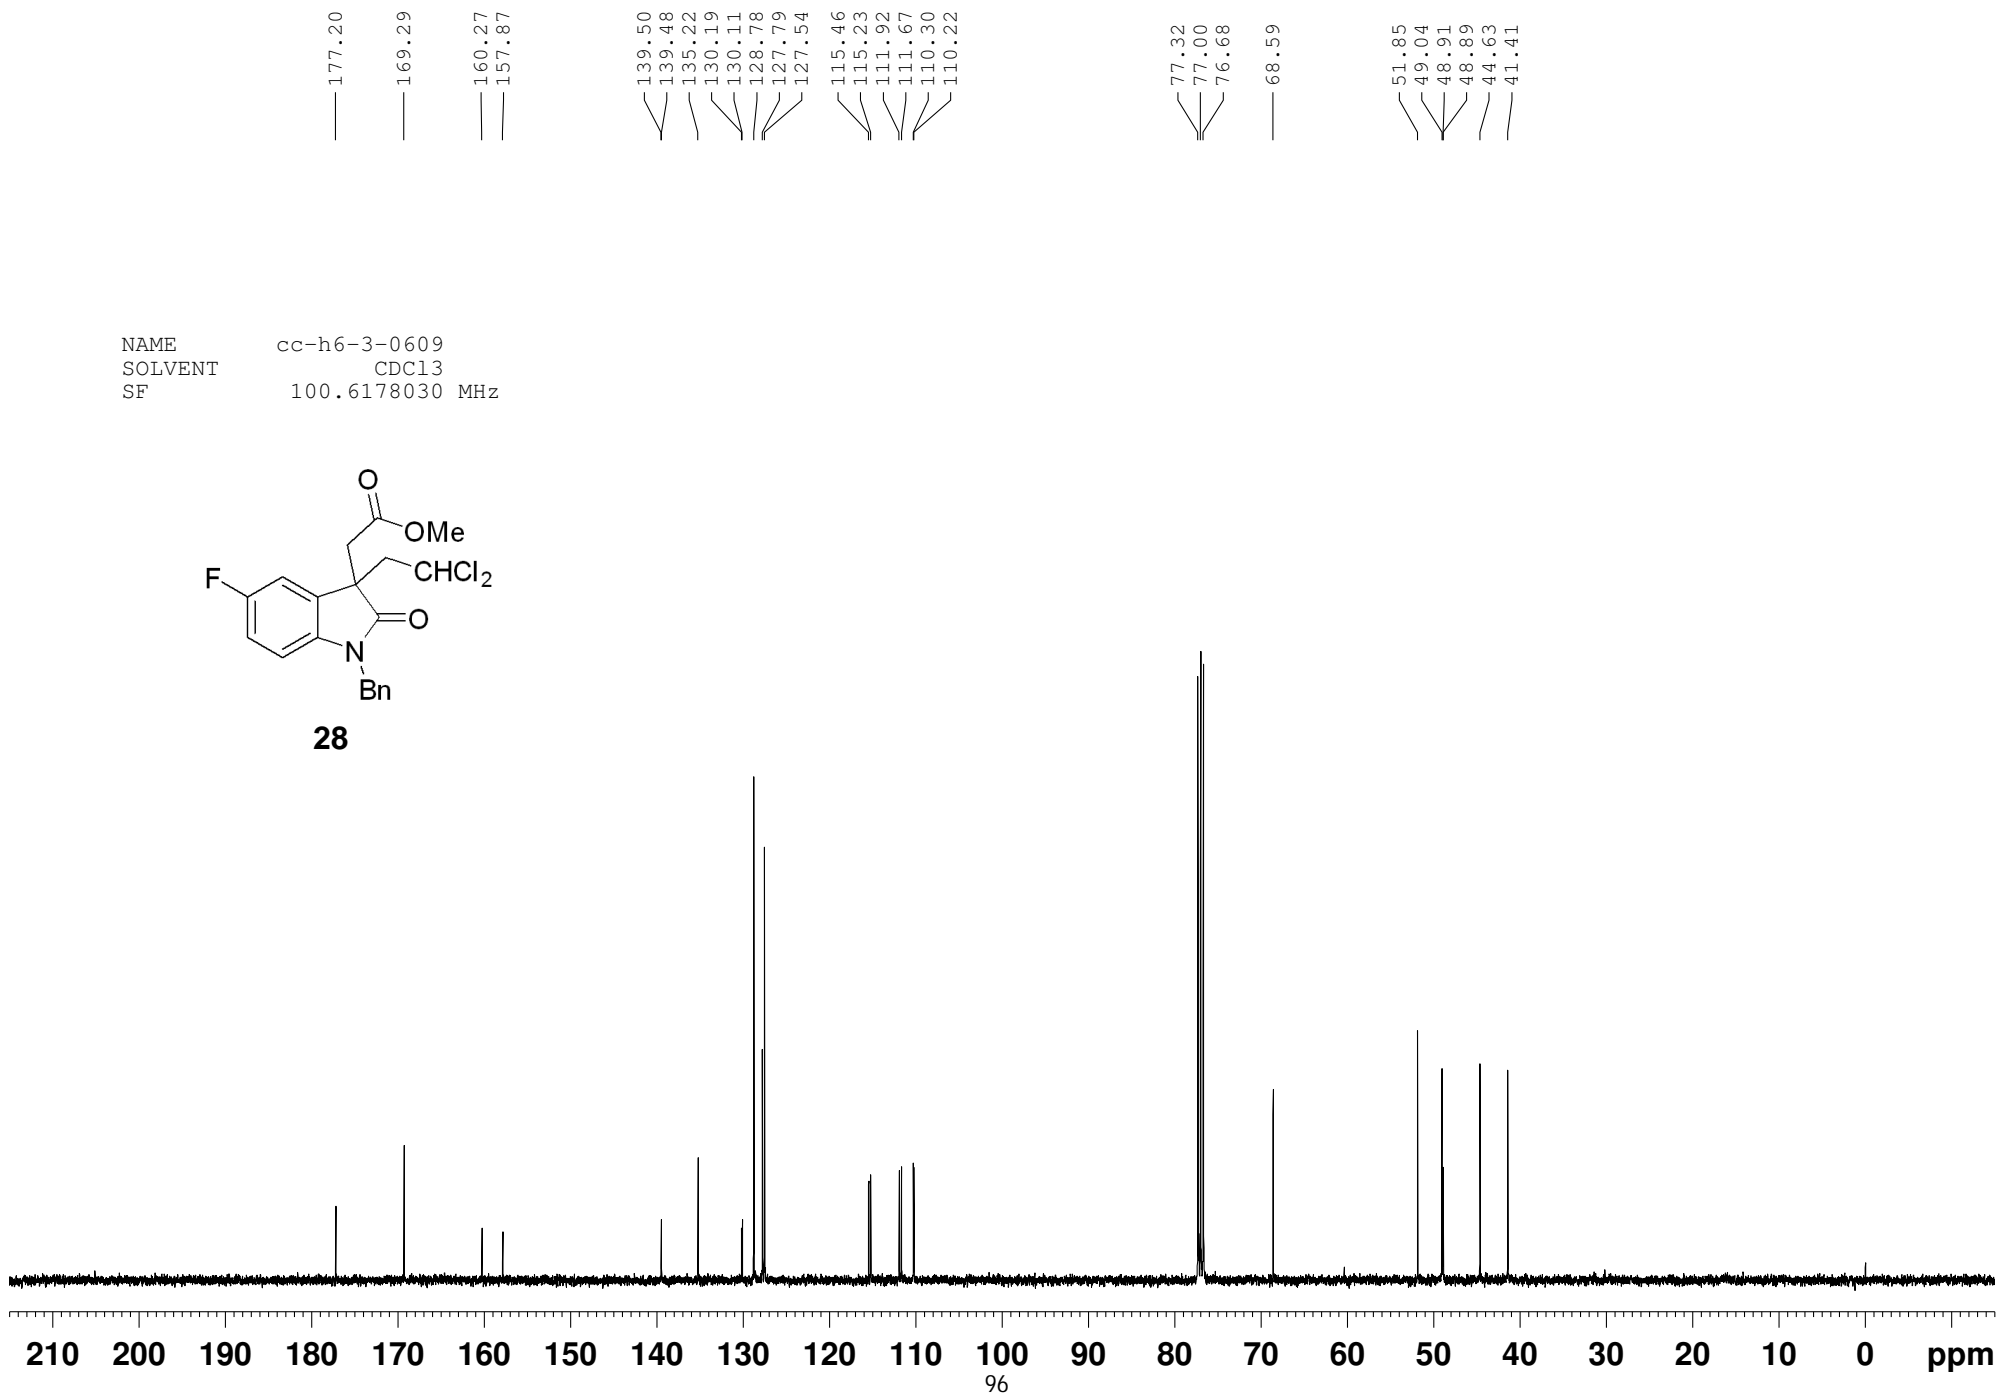



NAME cc-H144  
SOLVENT CDC13  
SF 400.1500095 MHz

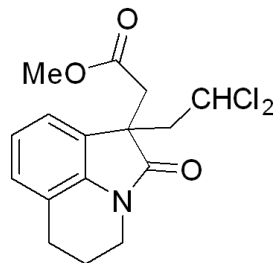

29

7.260  
7.103  
7.084  
7.075  
7.056  
6.966  
6.947  
6.928

5.436  
5.419  
5.403  
3.754  
3.740  
3.722  
3.715  
3.709  
3.703  
3.699  
3.692  
3.686  
3.668  
3.654  
3.508  
2.946  
2.930  
2.908  
2.867  
2.846  
2.805  
2.790  
2.775  
2.759  
2.043  
2.023  
2.009  
1.995  
1.981  
1.966  
1.951  
1.933

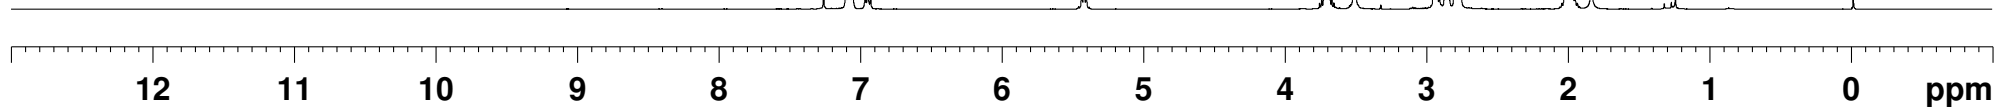

2.01  
1.01

97

1.00

2.10  
3.09

1.99  
2.20  
2.07

2.12

NAME cc-H144  
SOLVENT CDC13  
SF 100.6178063 MHz

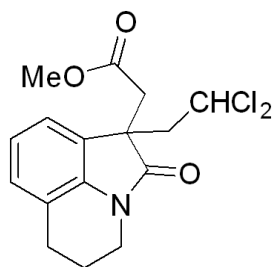

29

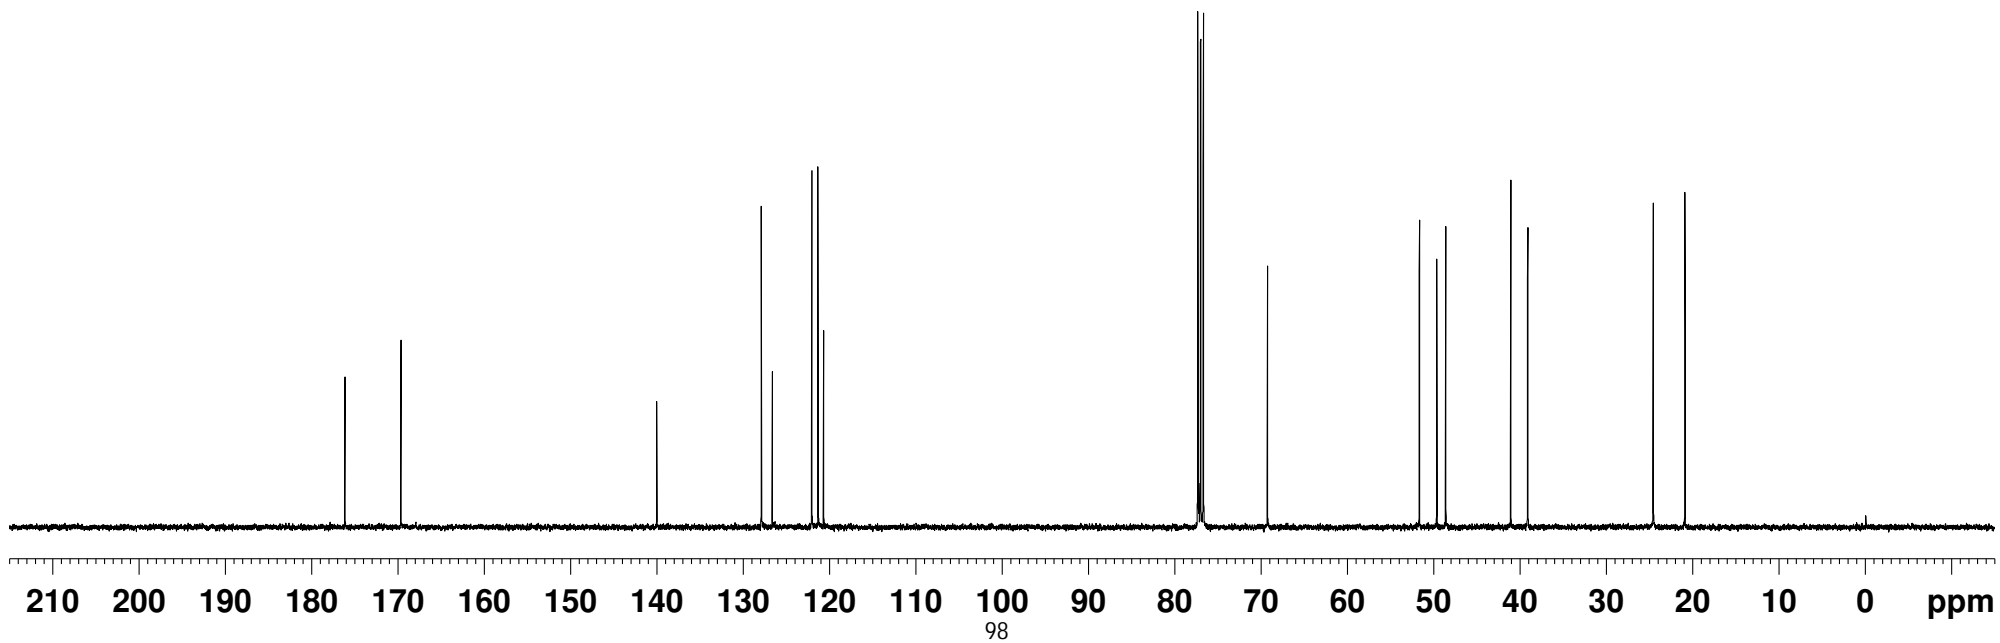

NAME cc-g161-1-up-0710  
SOLVENT CDCl3  
SF 400.1500061 MHz

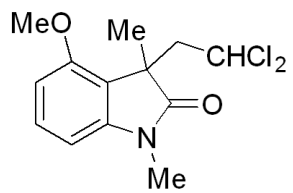

30

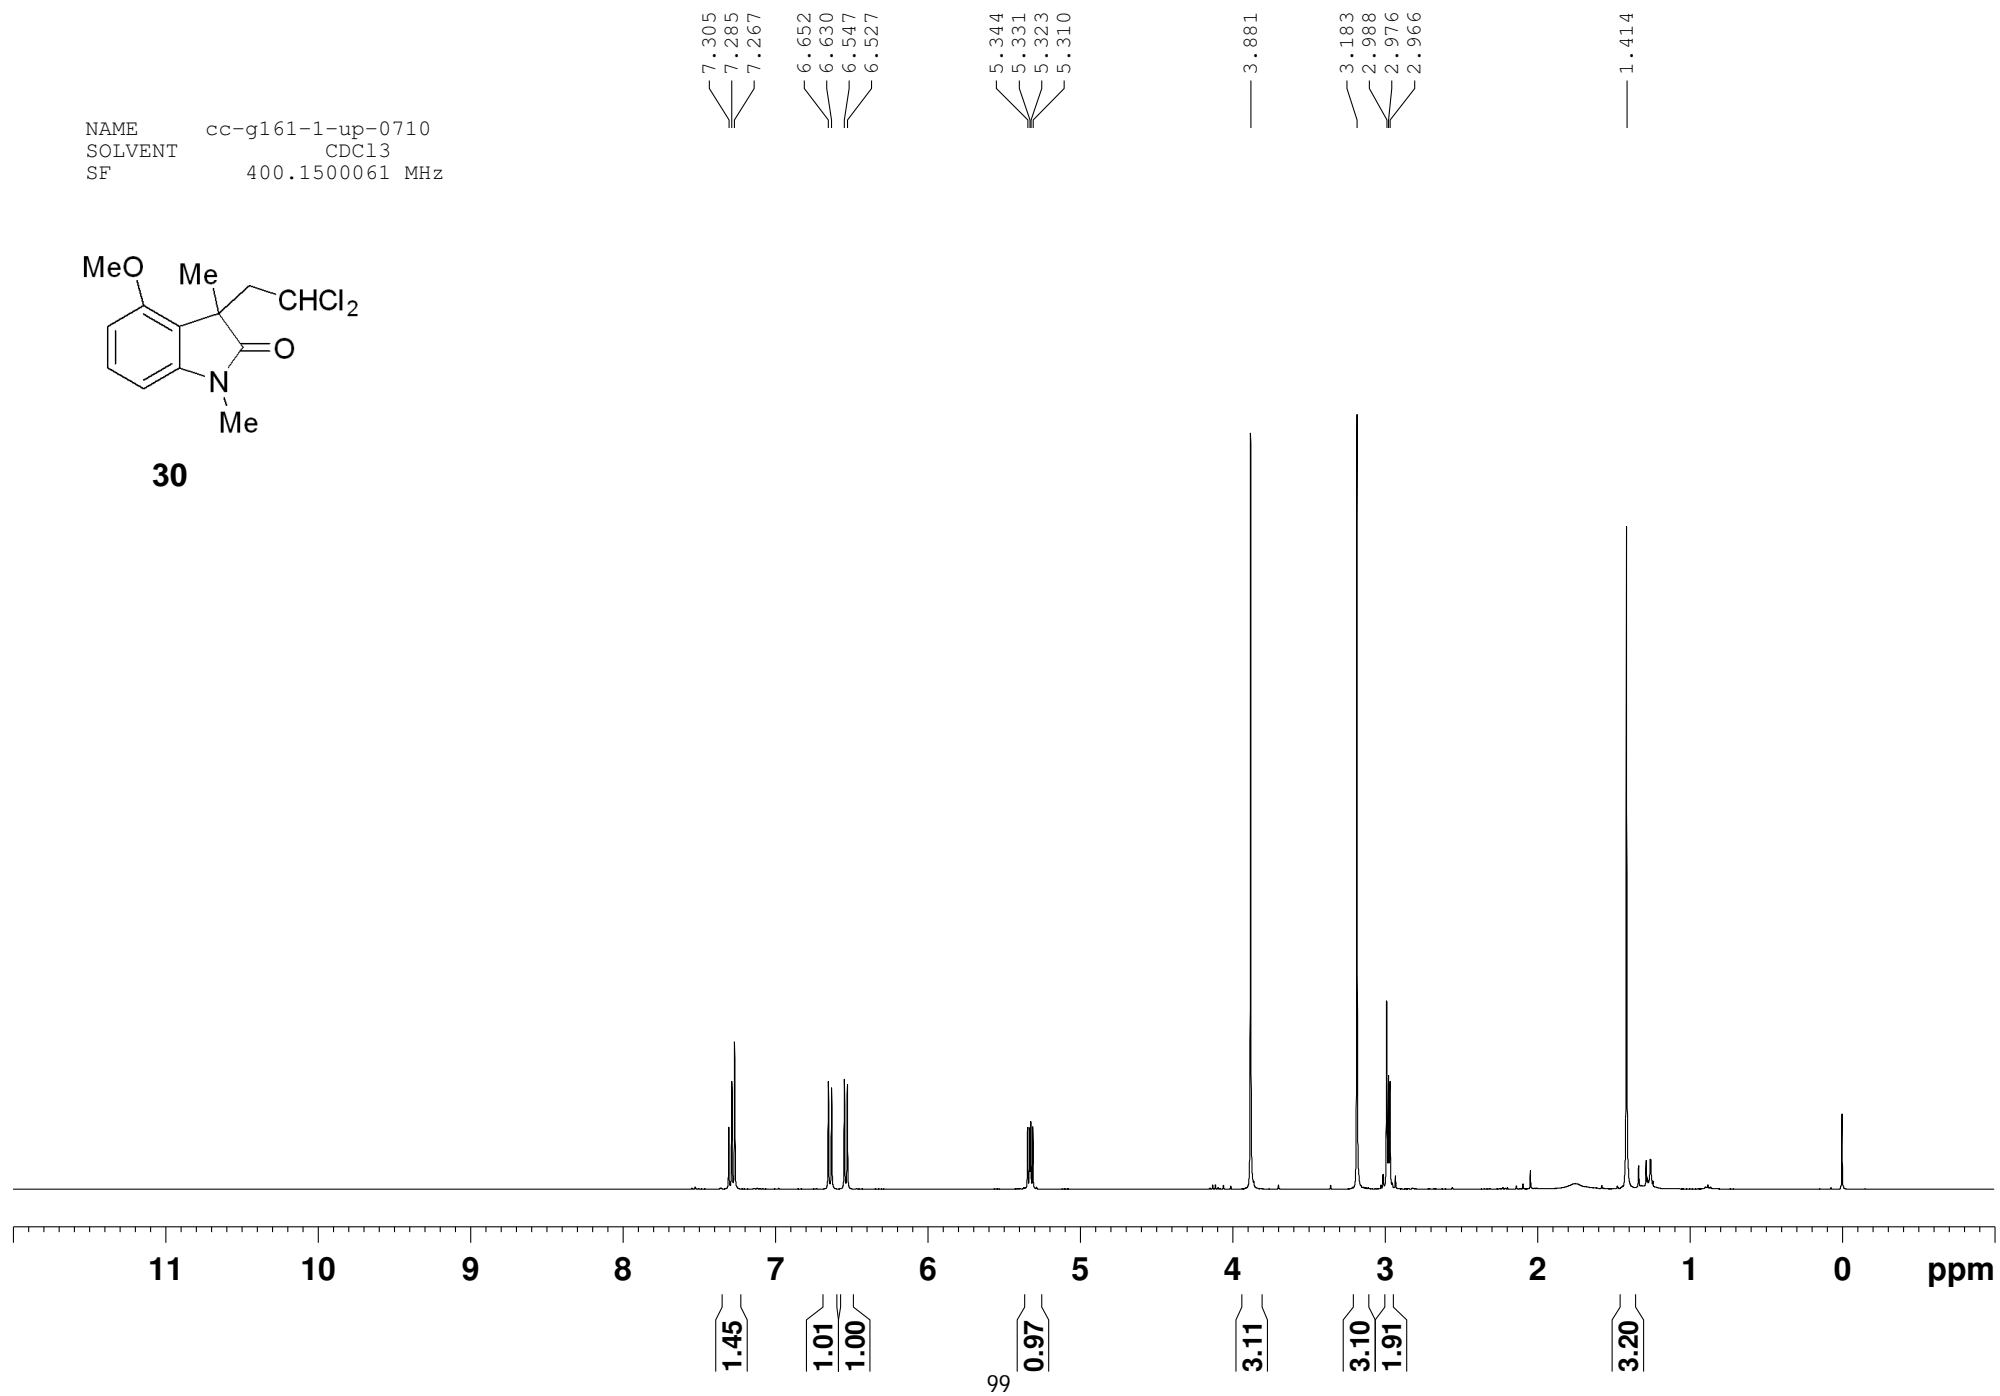

— 179.61  
 — 155.76  
 — 144.67  
 — 129.86  
 — 116.25  
 — 105.57  
 — 101.94  
 77.32  
 77.00  
 76.68  
 — 70.55  
 — 55.47  
 48.42  
 47.49  
 — 26.64  
 — 23.13

NAME cc-g161-up  
 SOLVENT CDCl3  
 SF 100.6178023 MHz

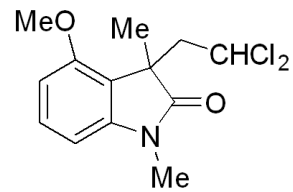

**30**

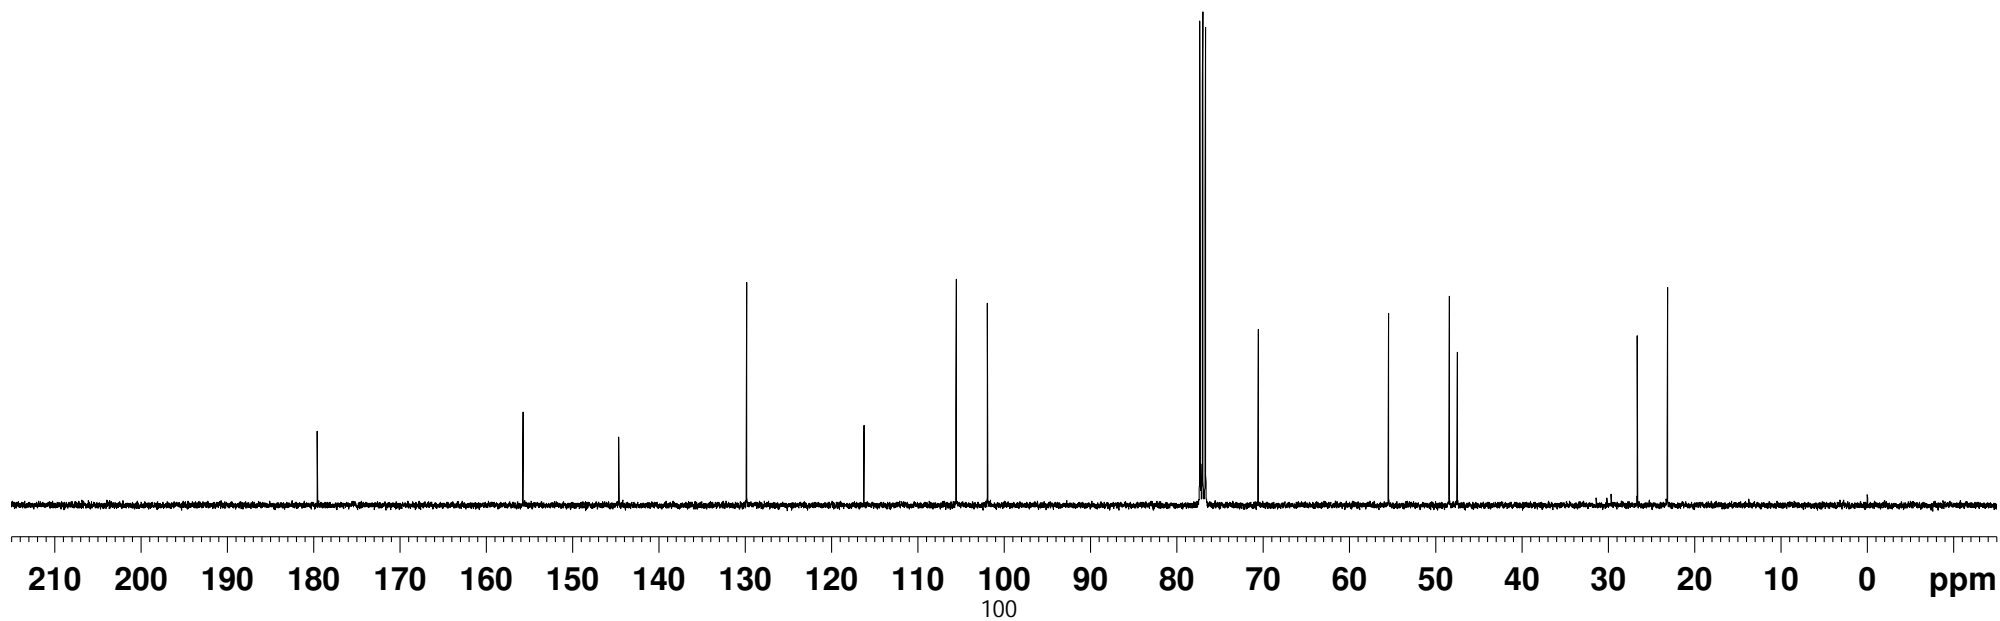

NAME cc-g161-1-down-0710  
SOLVENT CDC13  
SF 400.1500090 MHz

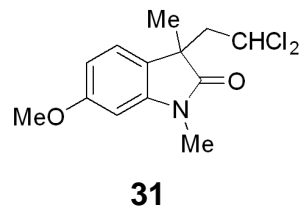

7.260  
7.086  
7.065  
6.603  
6.597  
6.583  
6.577  
6.455  
6.450  
5.388  
5.378  
5.365  
5.355  
3.839  
3.176  
3.033  
3.010  
2.996  
2.973  
2.683  
2.672  
2.646  
2.636  
1.362

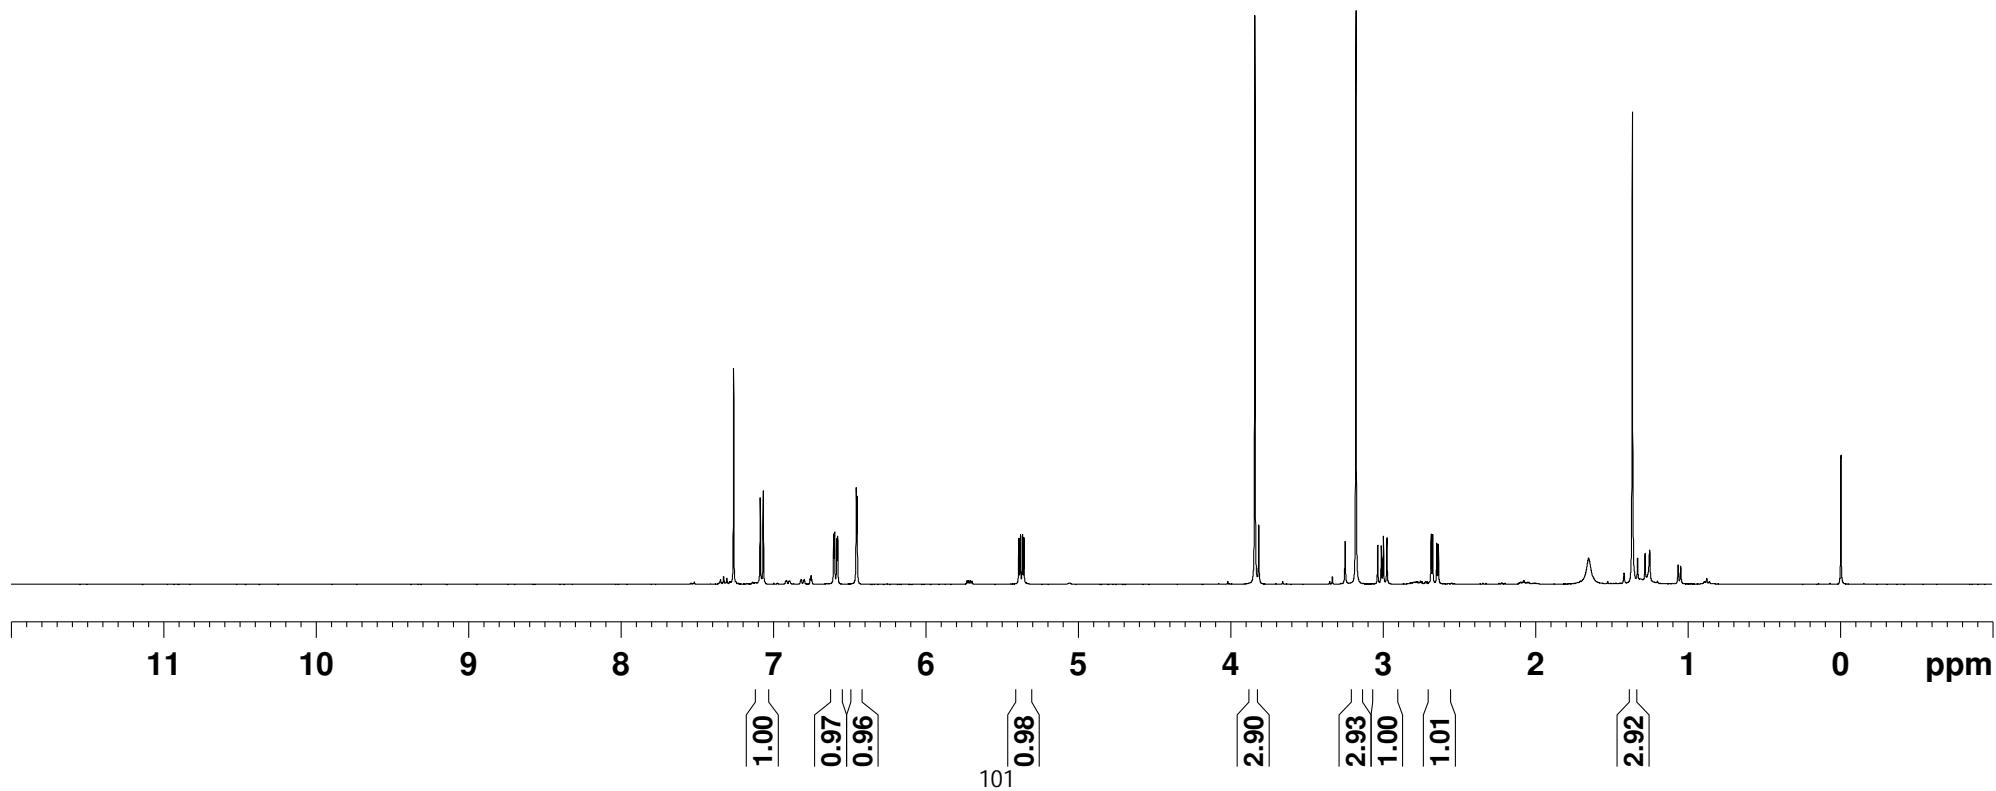

179.61  
160.51  
144.70  
123.25  
122.76  
106.47  
96.58  
77.32  
77.00  
76.69  
69.77  
55.53  
50.29  
46.69  
26.45  
25.52

NAME cc-g161-1-down  
SOLVENT CDCl3  
SF 100.6178008 MHz

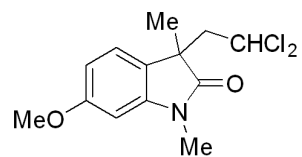

31

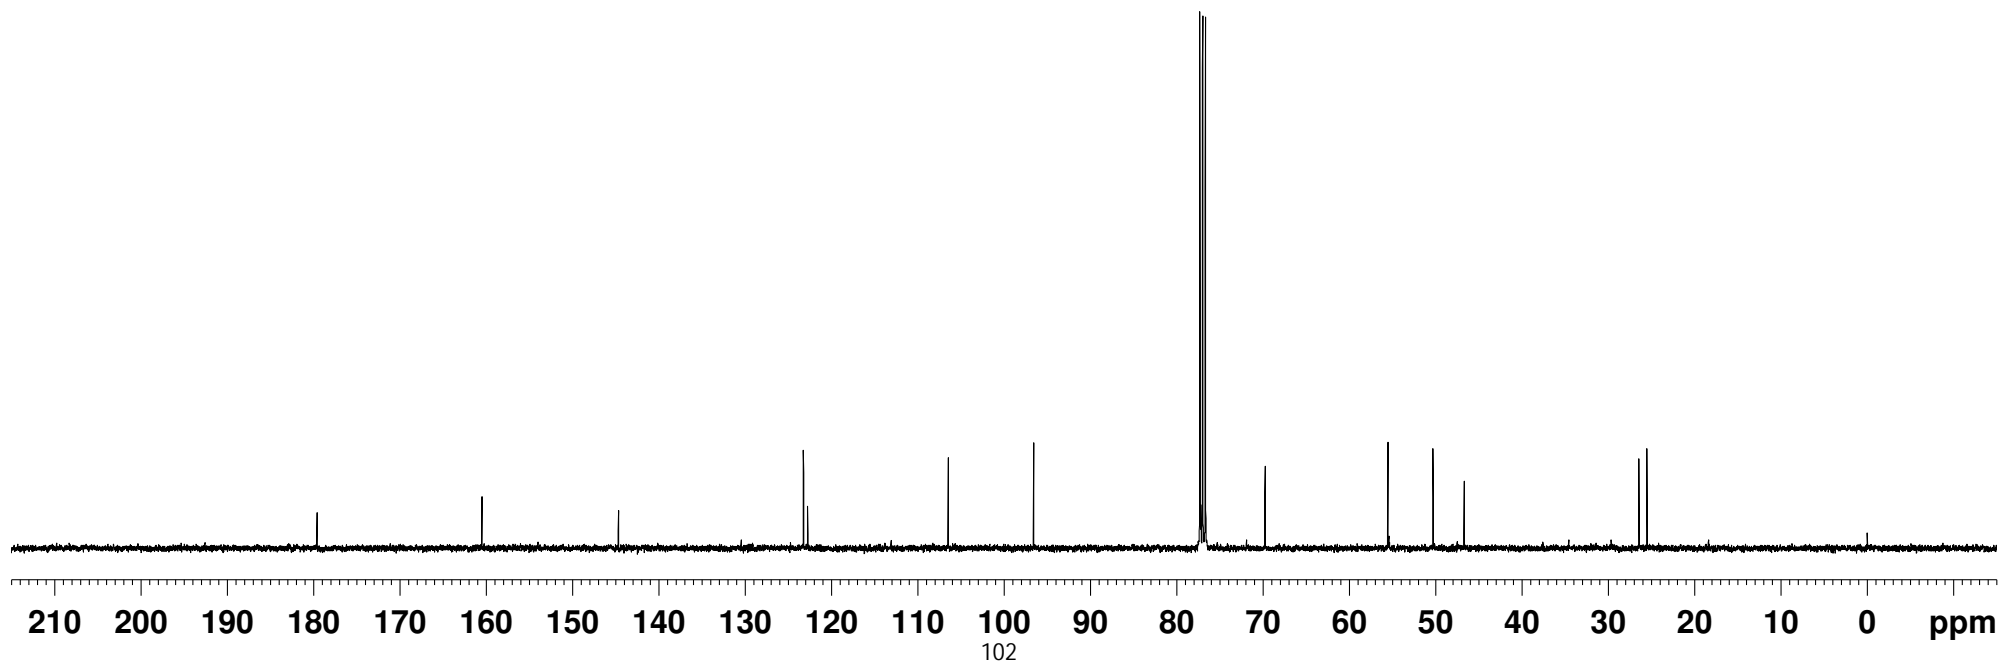

NAME cc-g155-3  
SOLVENT CDCl3  
SF 400.1500099 MHz

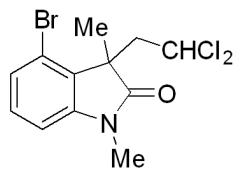

32

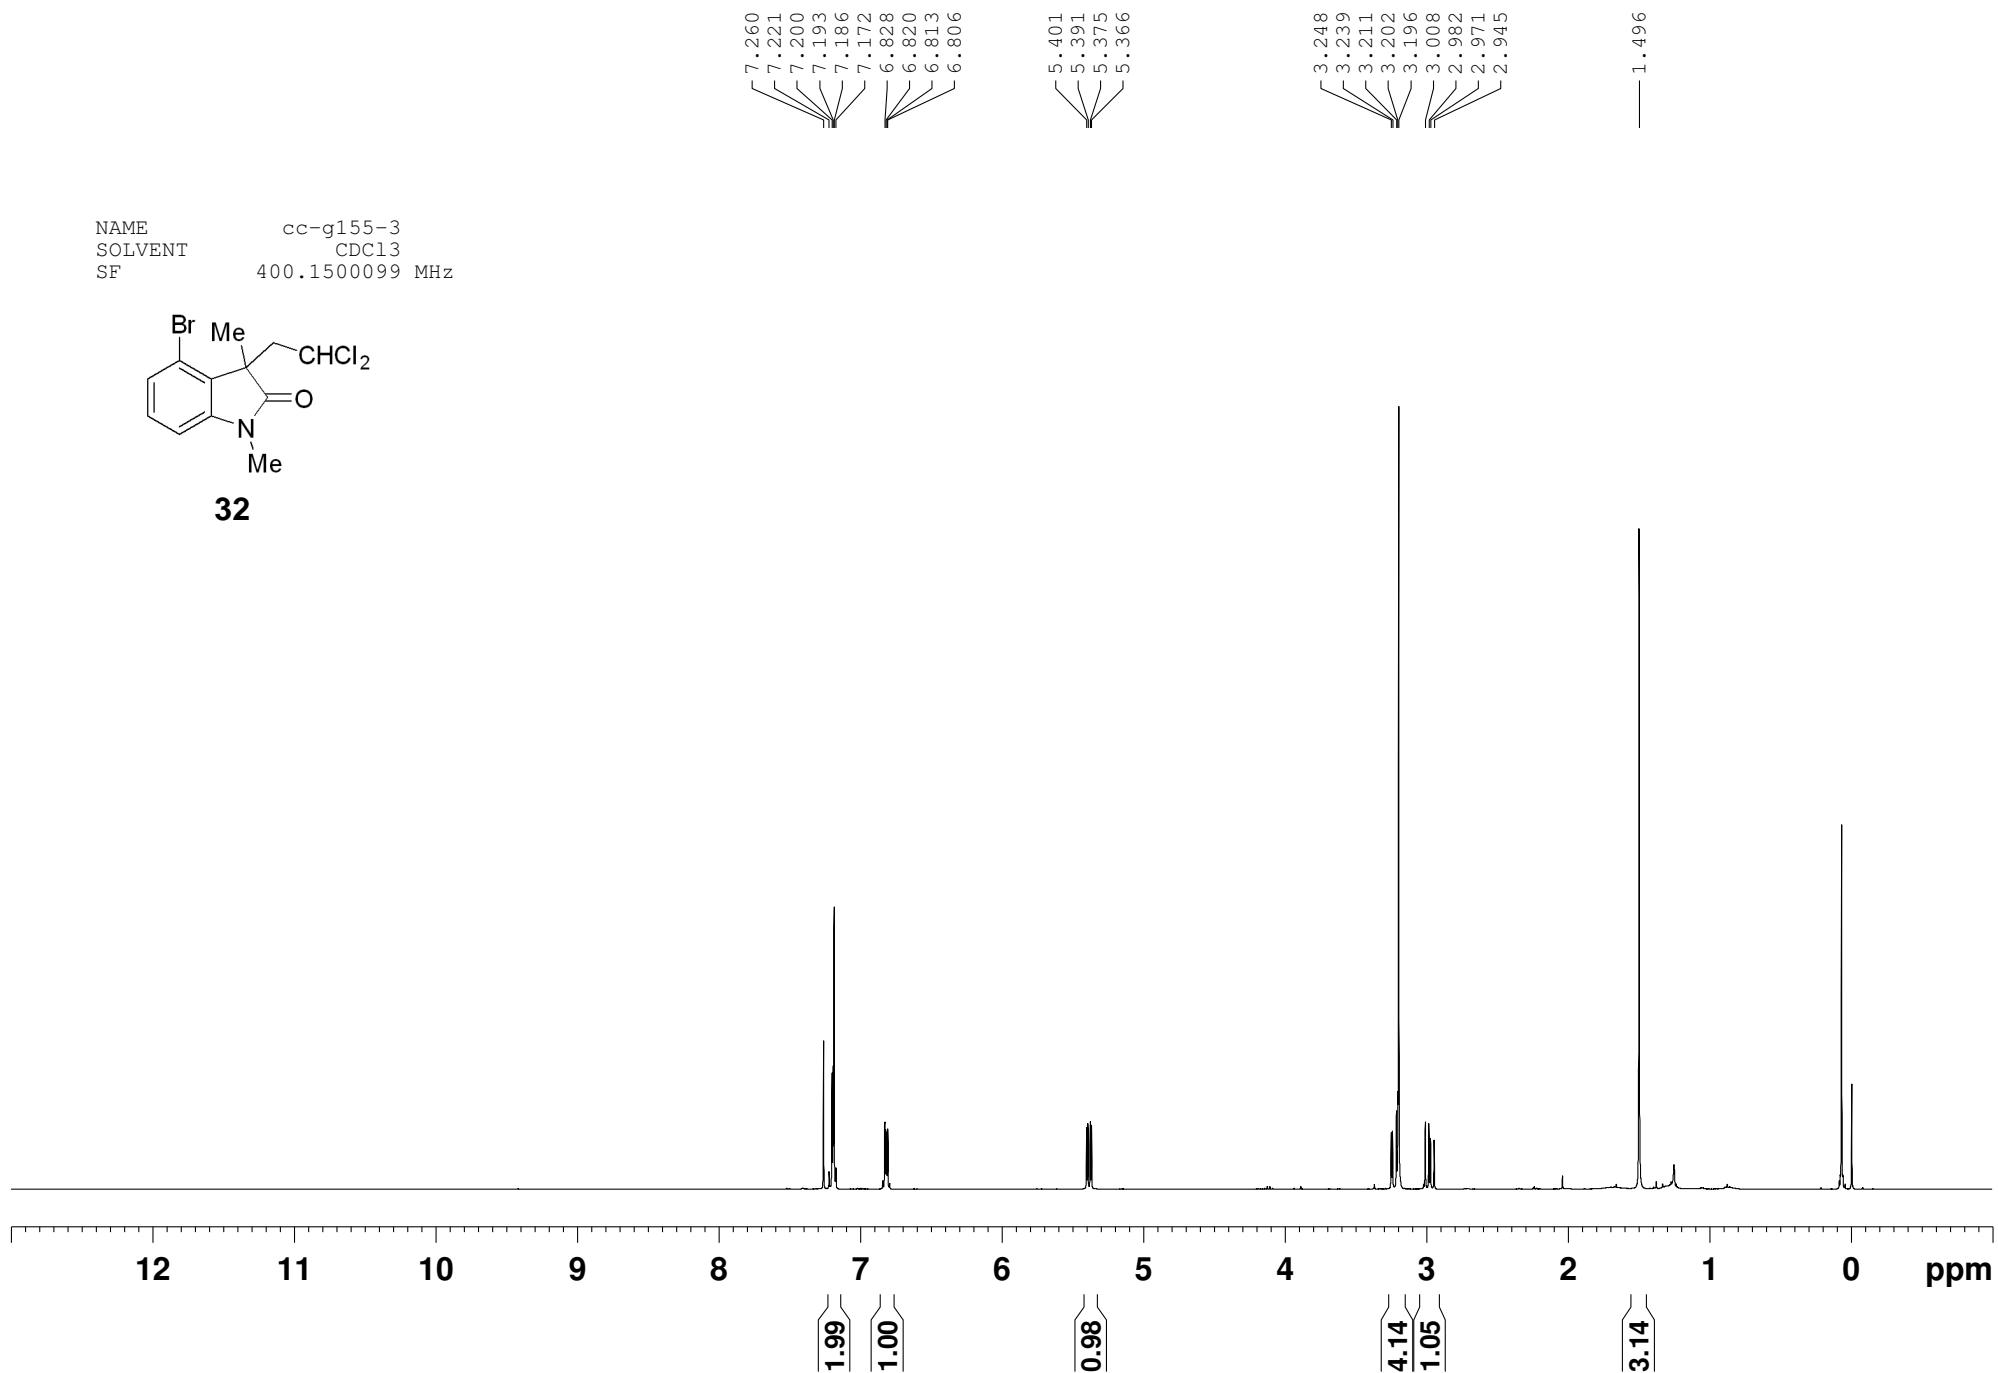

— 178.63

— 145.62

— 130.17  
— 128.89  
— 126.53

— 118.87

— 107.58

— 77.32  
— 77.00  
— 76.68

— 69.95

— 49.24  
— 47.59

— 26.65  
— 22.47

NAME cc-g155-3  
SOLVENT CDCl<sub>3</sub>  
SF 100.6178016 MHz

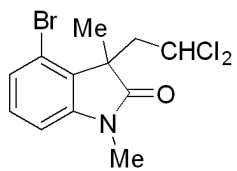

**32**

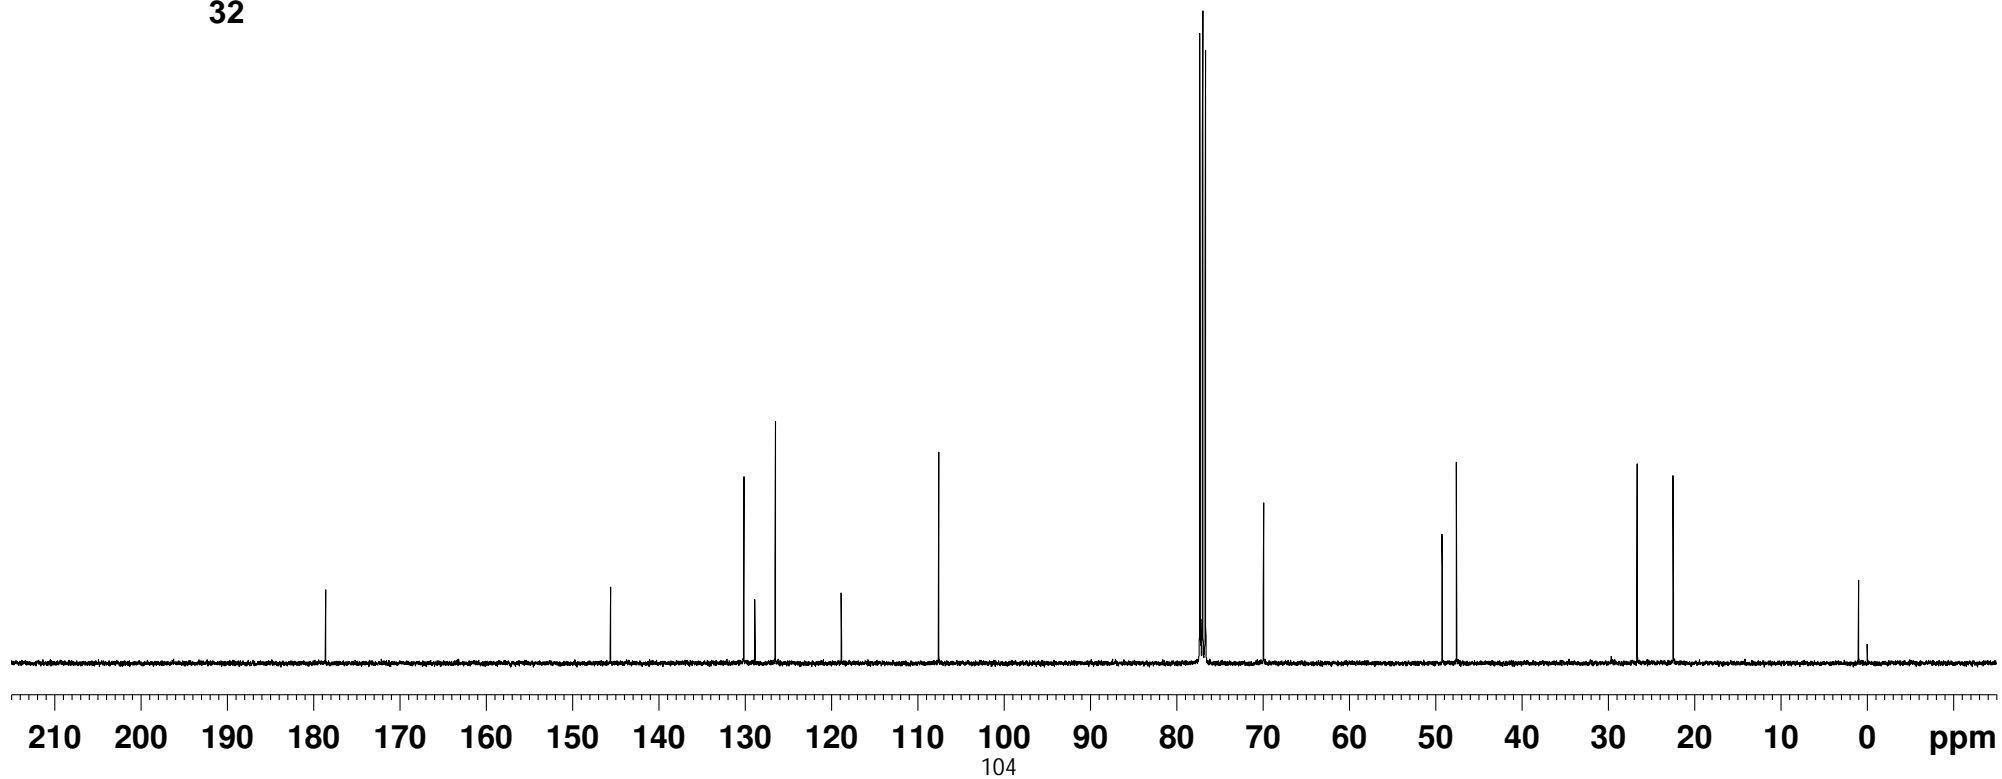



NAME cc-g155-3-up  
SOLVENT CDCl3  
SF 400.150099 MHz

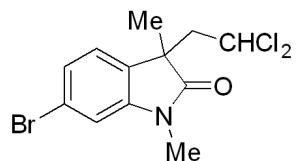

33

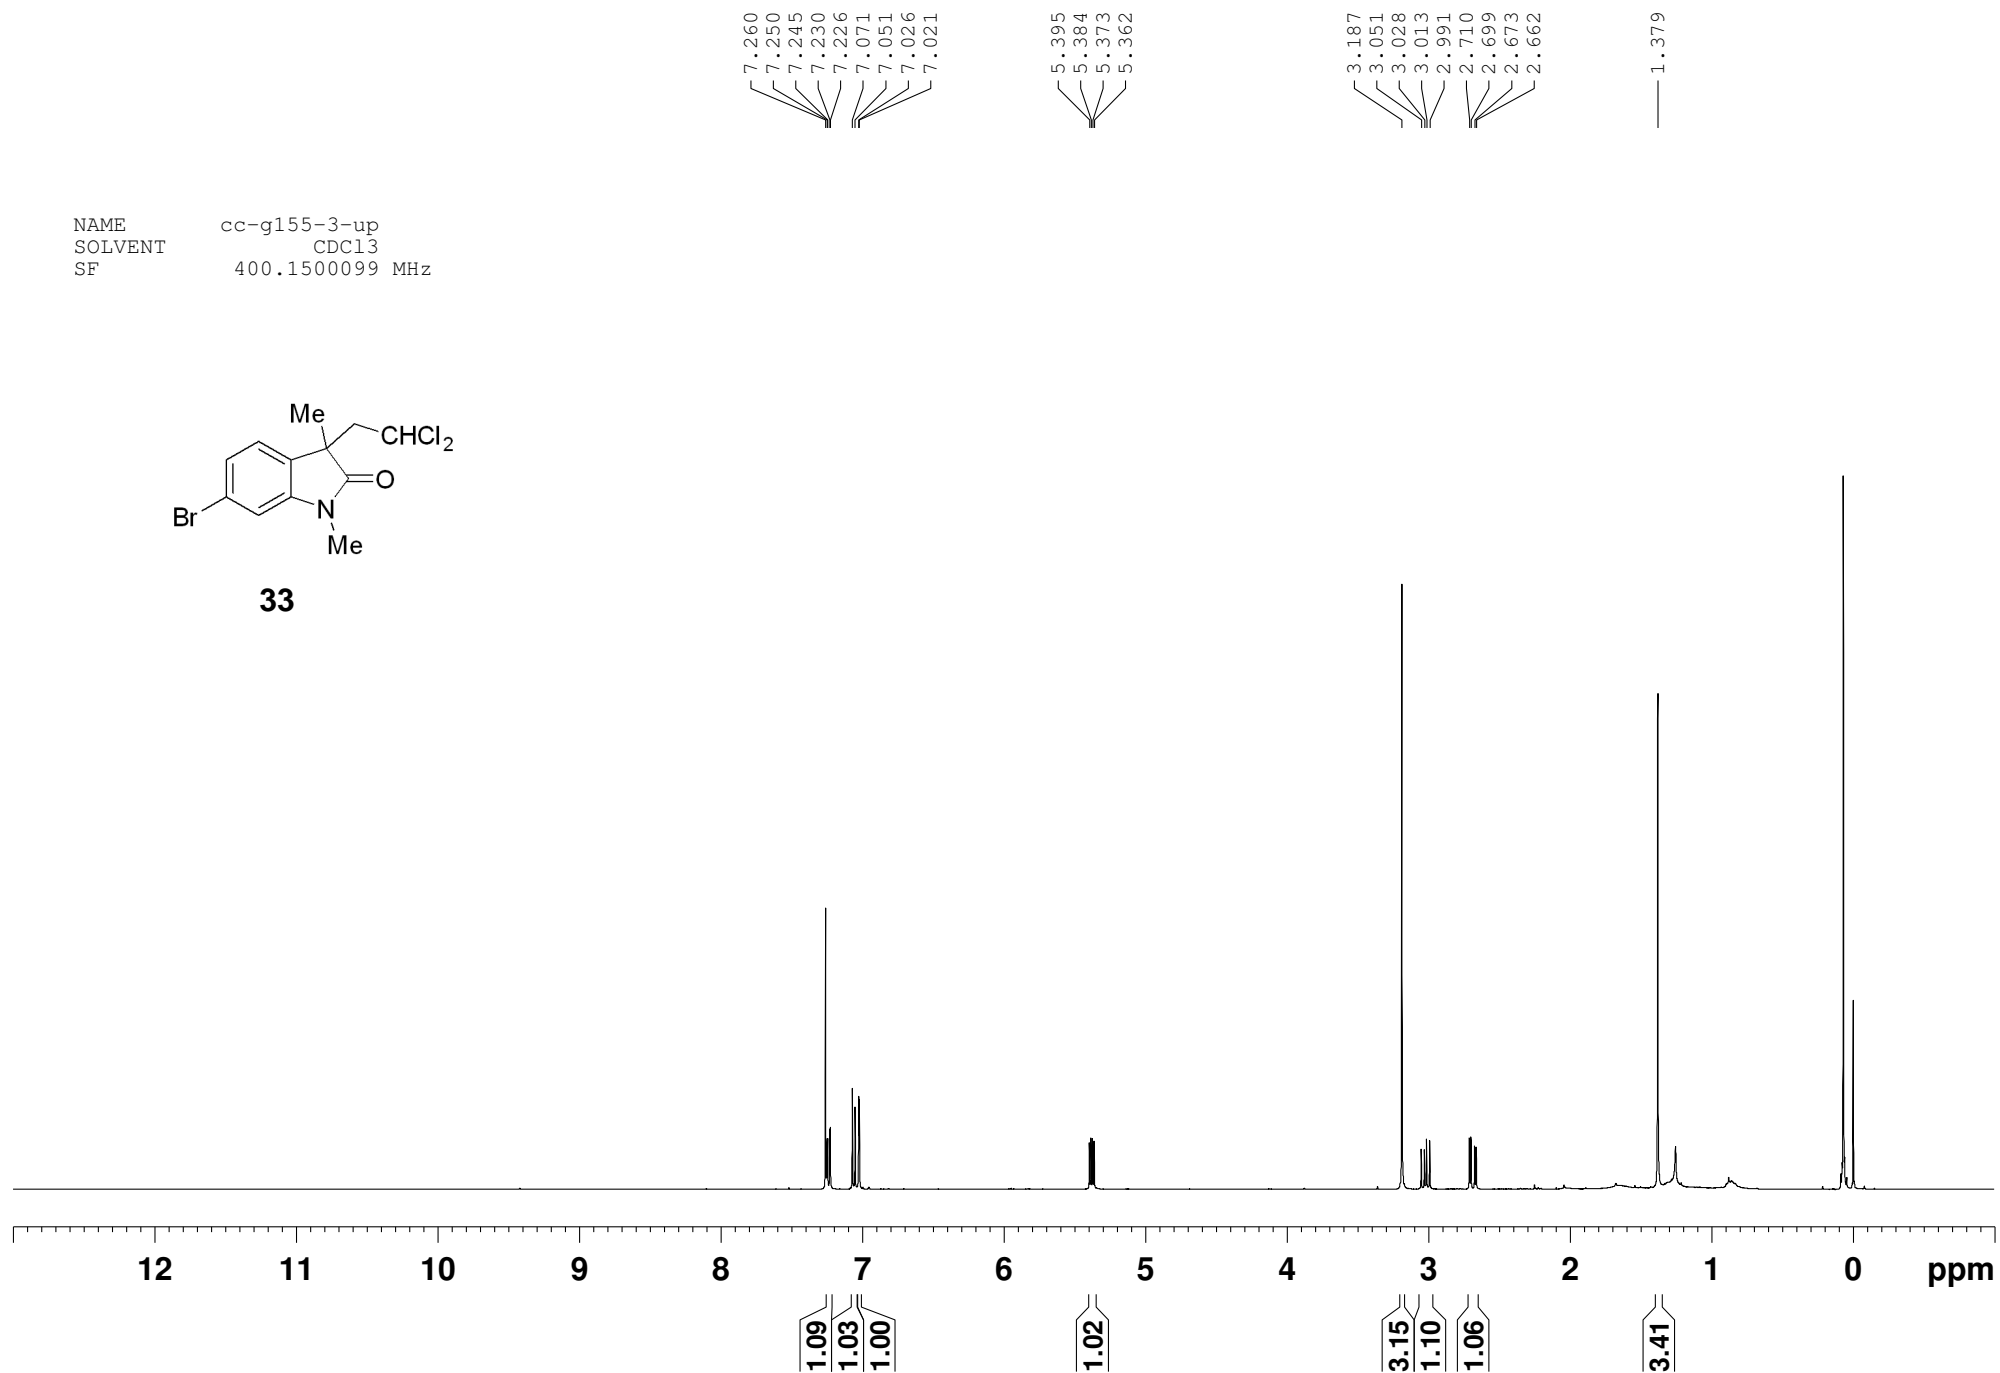

NAME cc-g155-3-up  
SOLVENT CDCl3  
SF 100.6177997 MHz

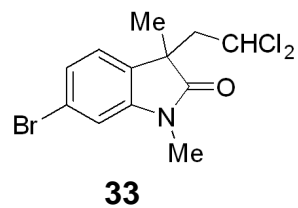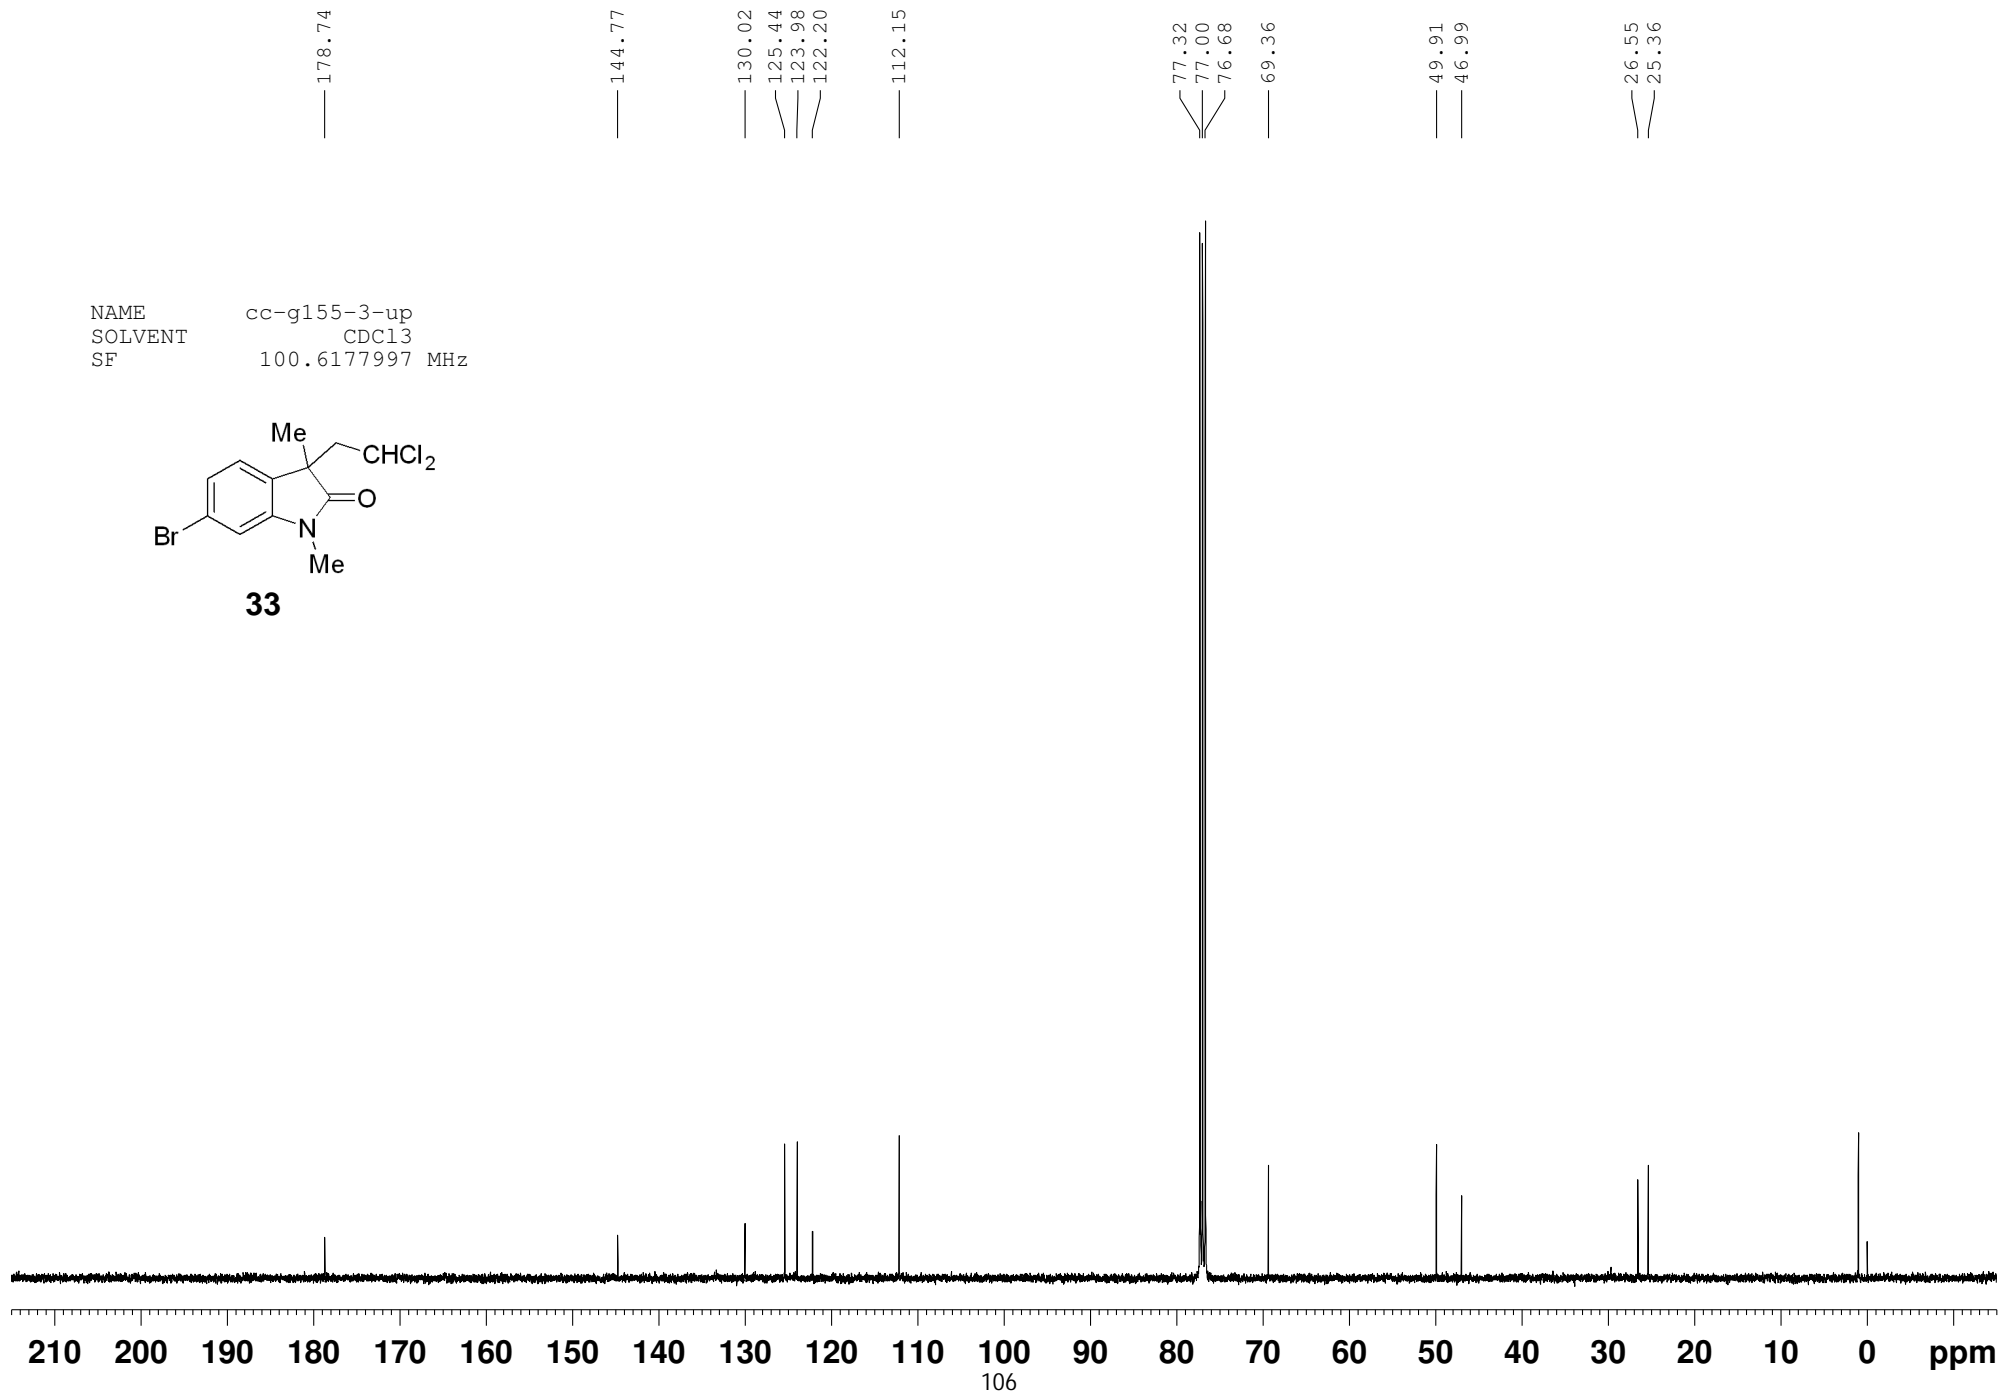

NAME cc-g104-2  
SOLVENT CDC13  
SF 400.1500096 MHz

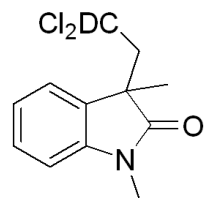

3-D

7.332  
7.329  
7.313  
7.310  
7.294  
7.291  
7.260  
7.199  
7.198  
7.181  
7.110  
7.108  
7.091  
7.090  
7.073  
7.071  
6.878  
6.859

3.197  
3.038  
3.000  
2.712  
2.675

1.385

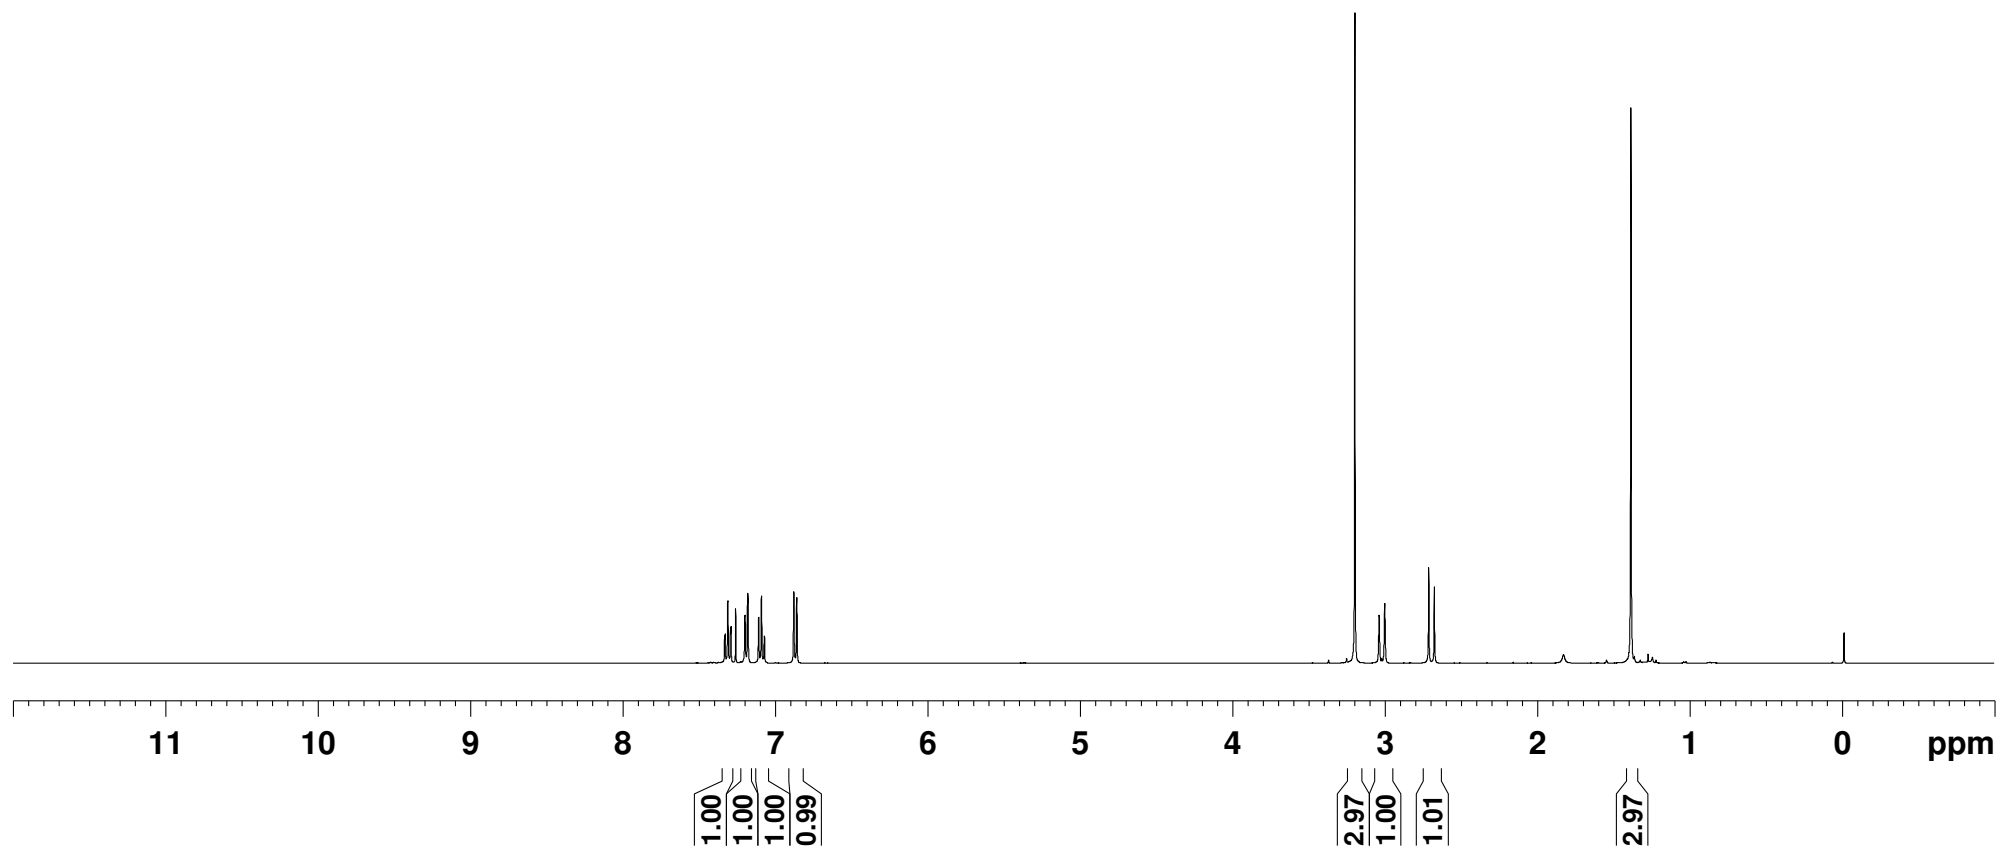

178.94

143.34

130.97

128.58

122.64

122.60

108.57

77.32

77.00

76.68

69.62

69.35

69.08

49.94

47.09

26.40

25.37

NAME cc-G104-2-C  
SOLVENT CDC13  
SFO1 100.6228293 MHz

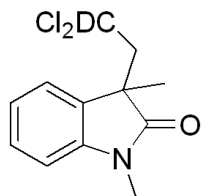

3-D

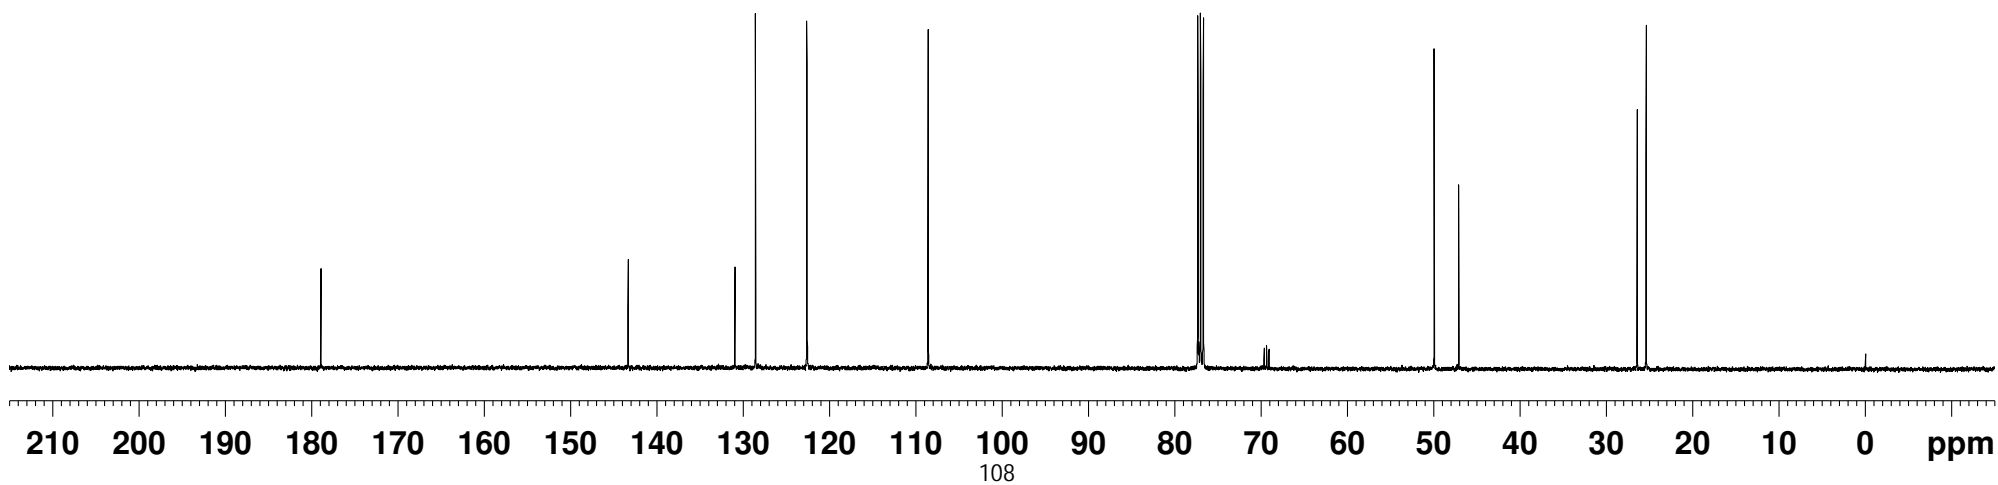

NAME cc-i94-2  
SOLVENT CDCl3  
SF 400.150096 MHz

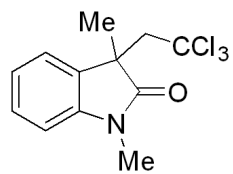

34

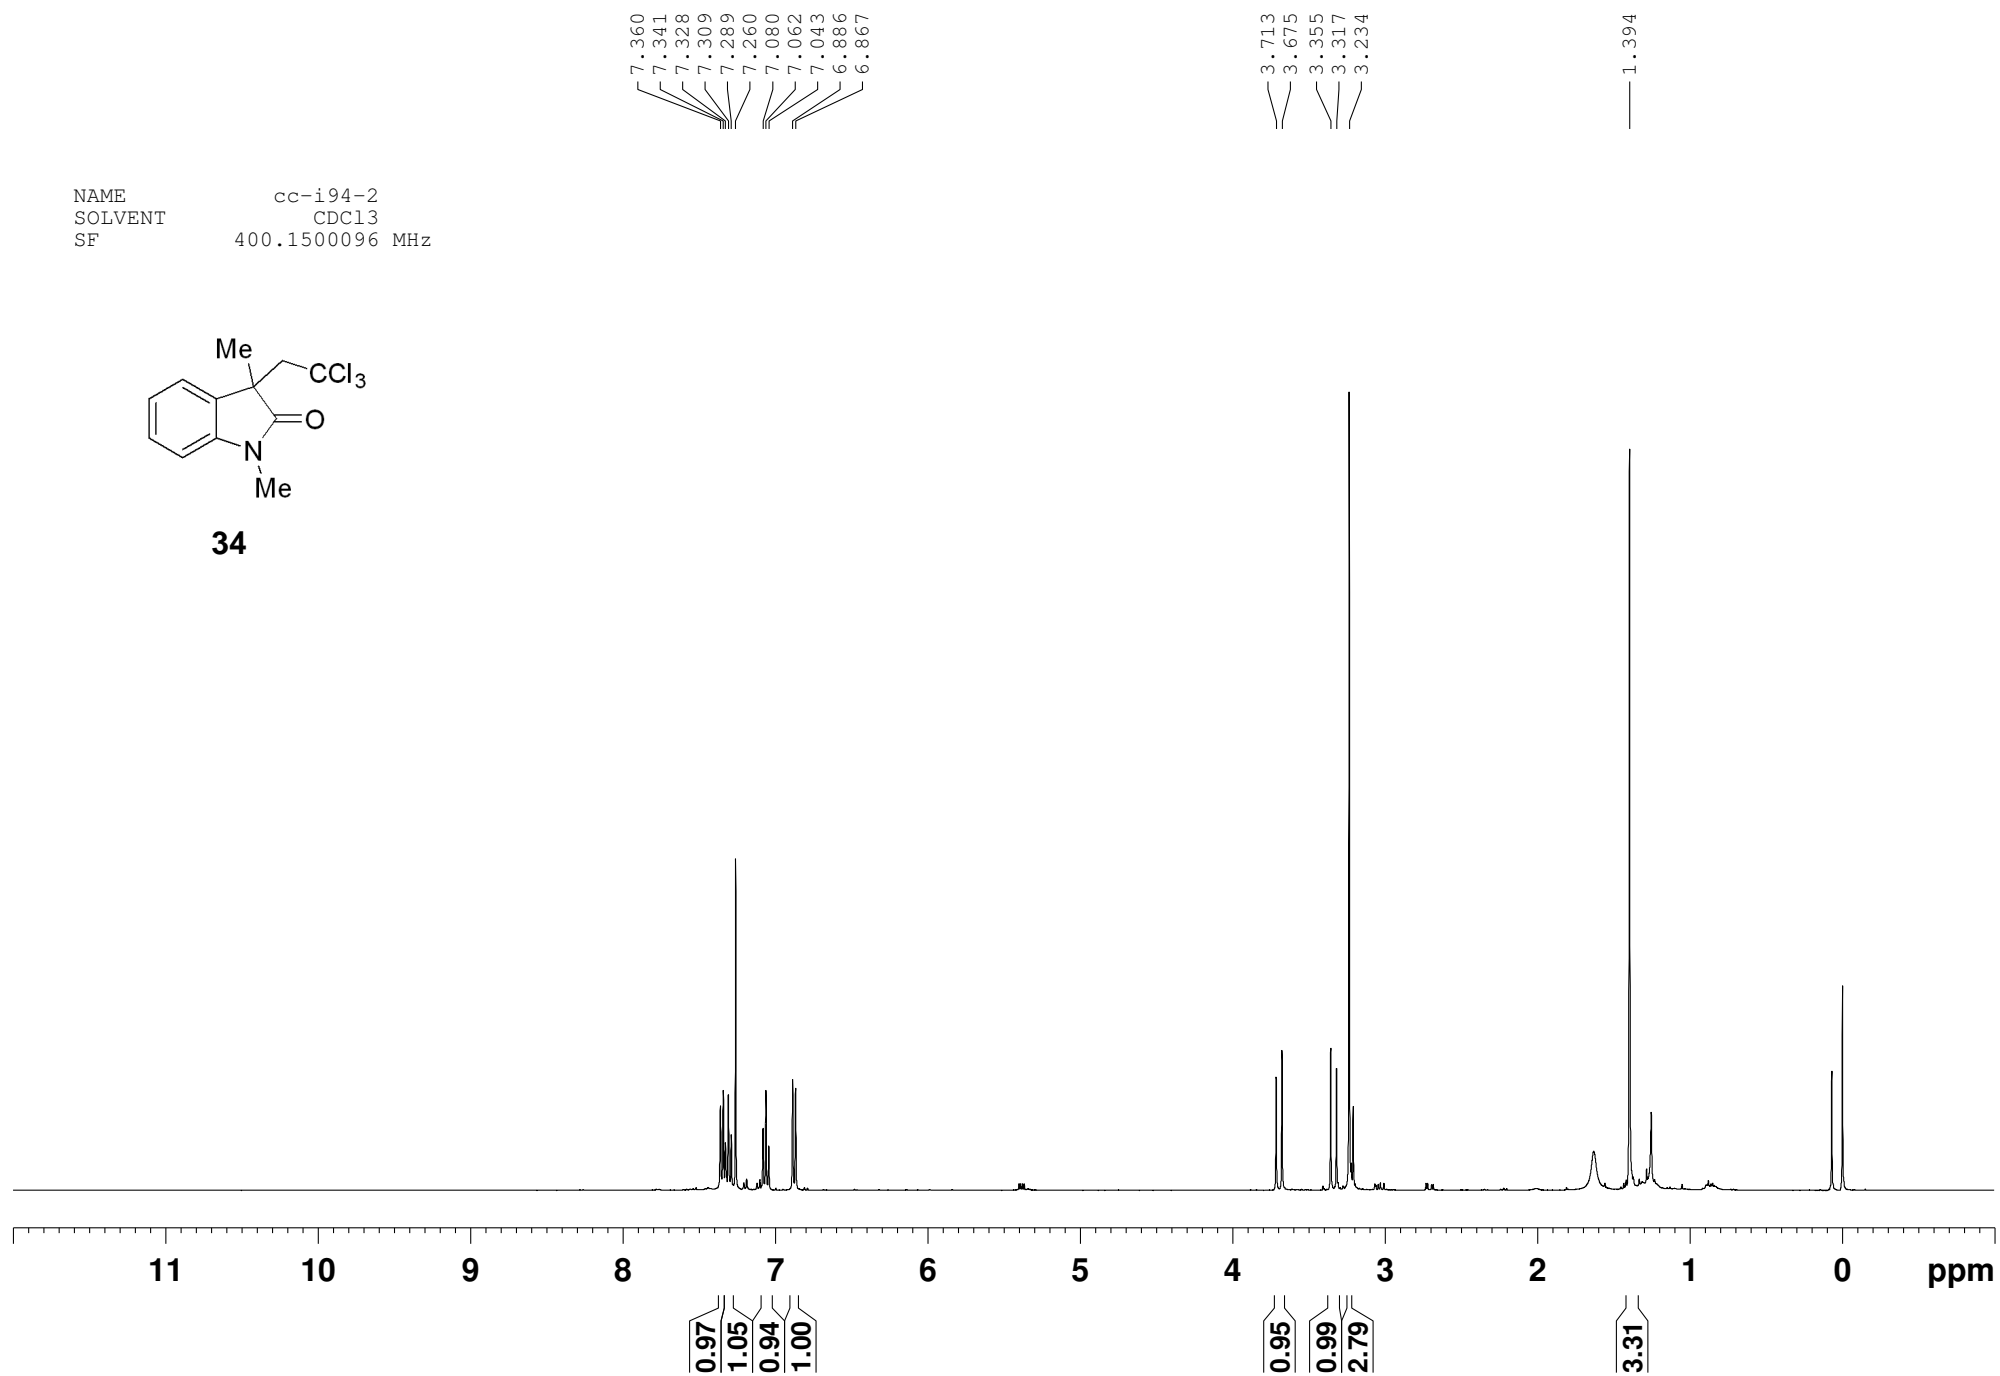

NAME cc-i94-2  
SOLVENT CDCl3  
SF 100.6178001 MHz

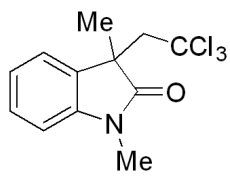

34

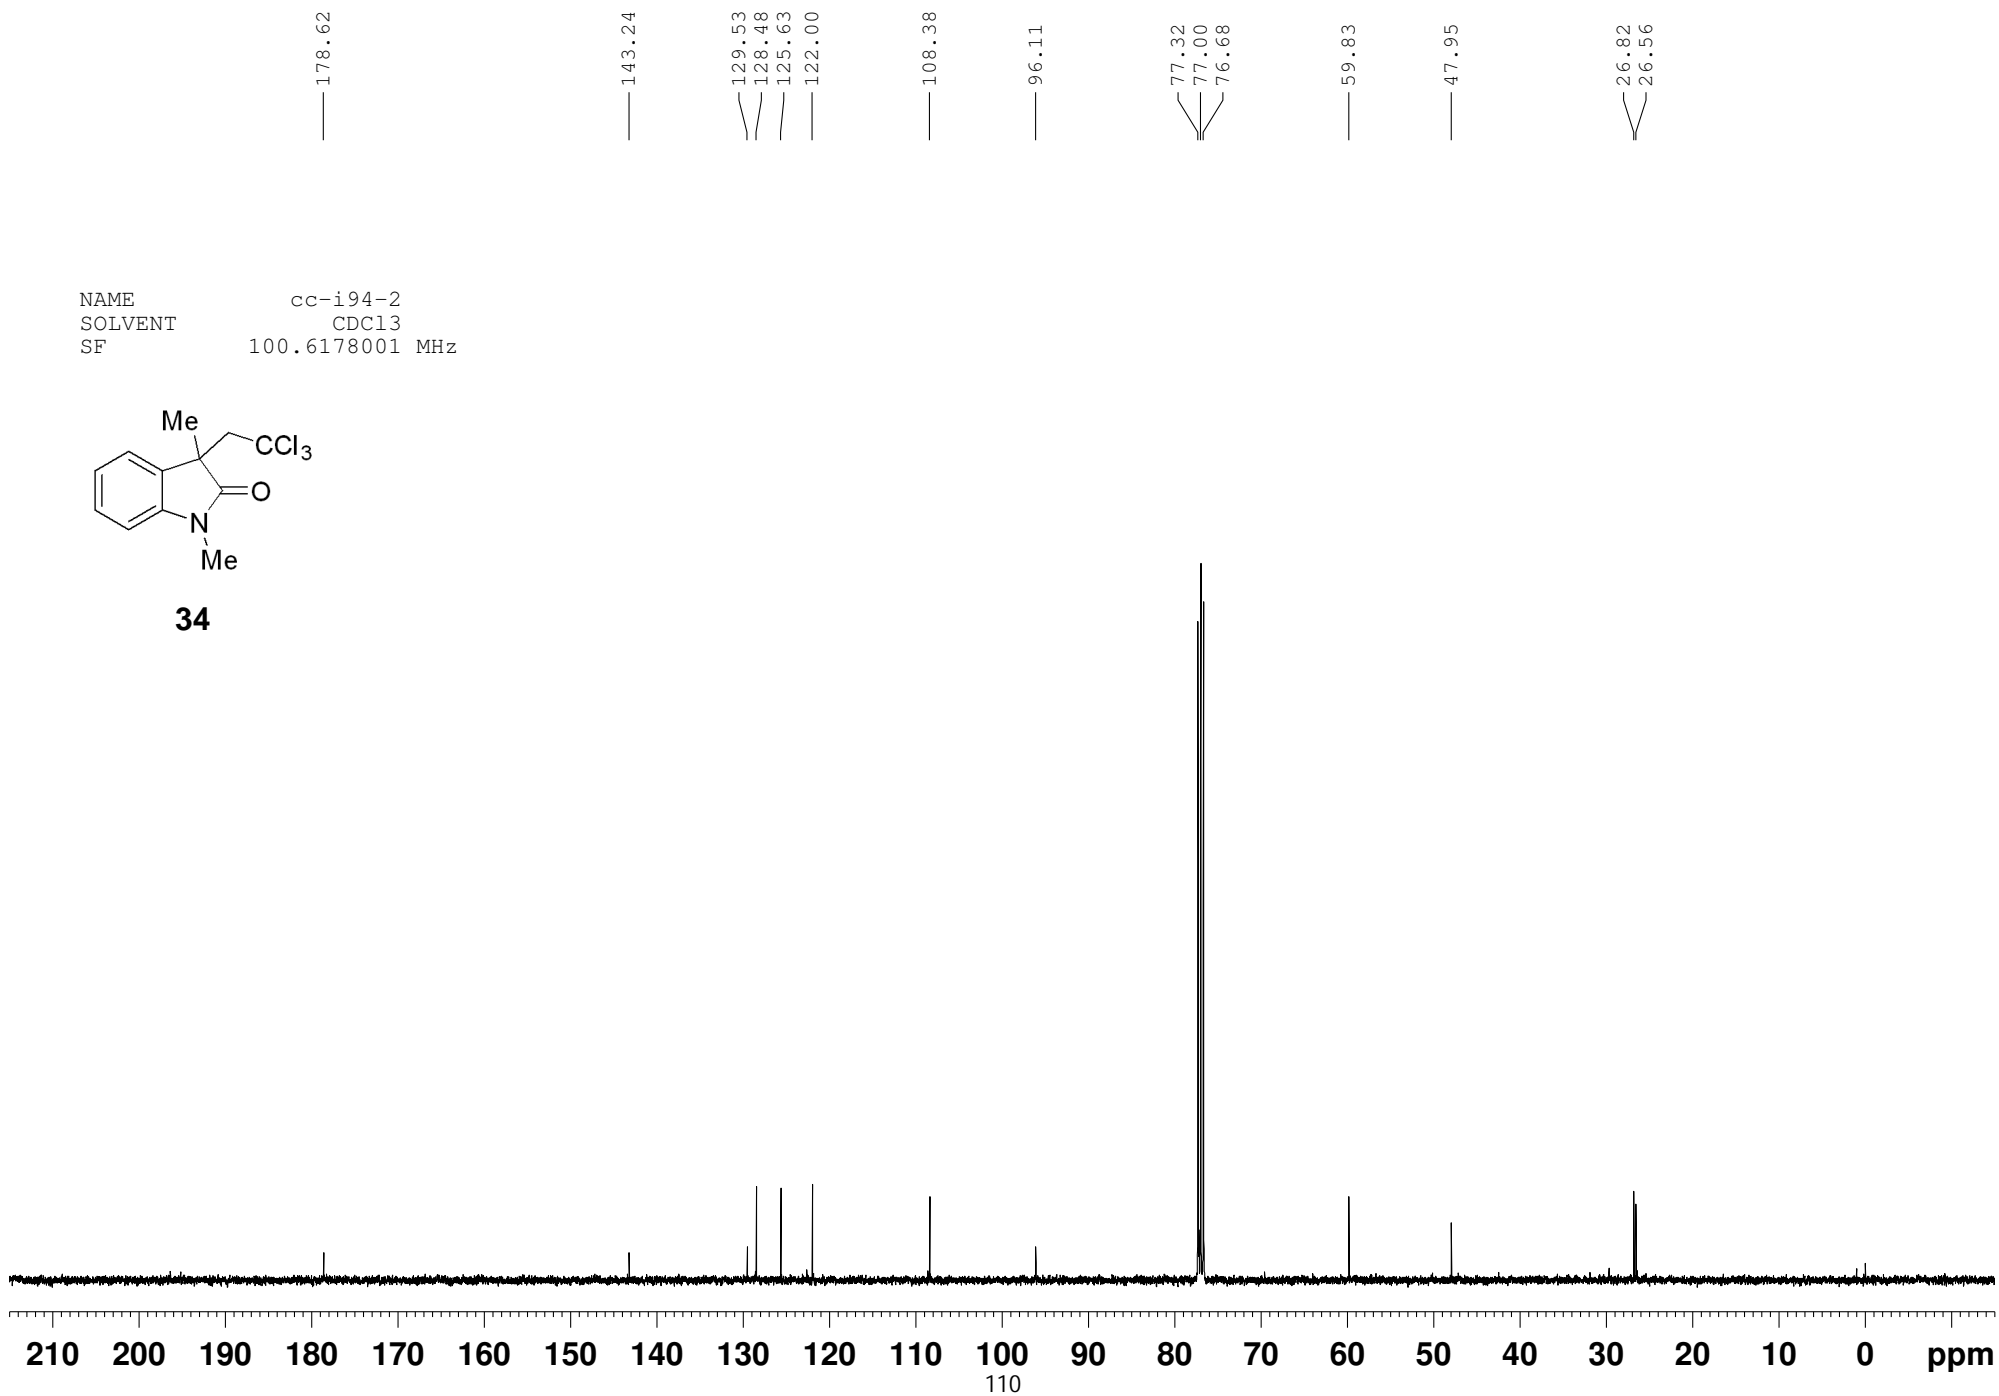

NAME cc-G104-5  
SOLVENT CDCl3  
SF 400.1500096 MHz

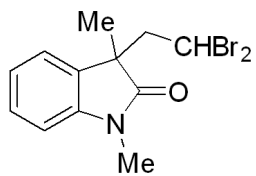

35

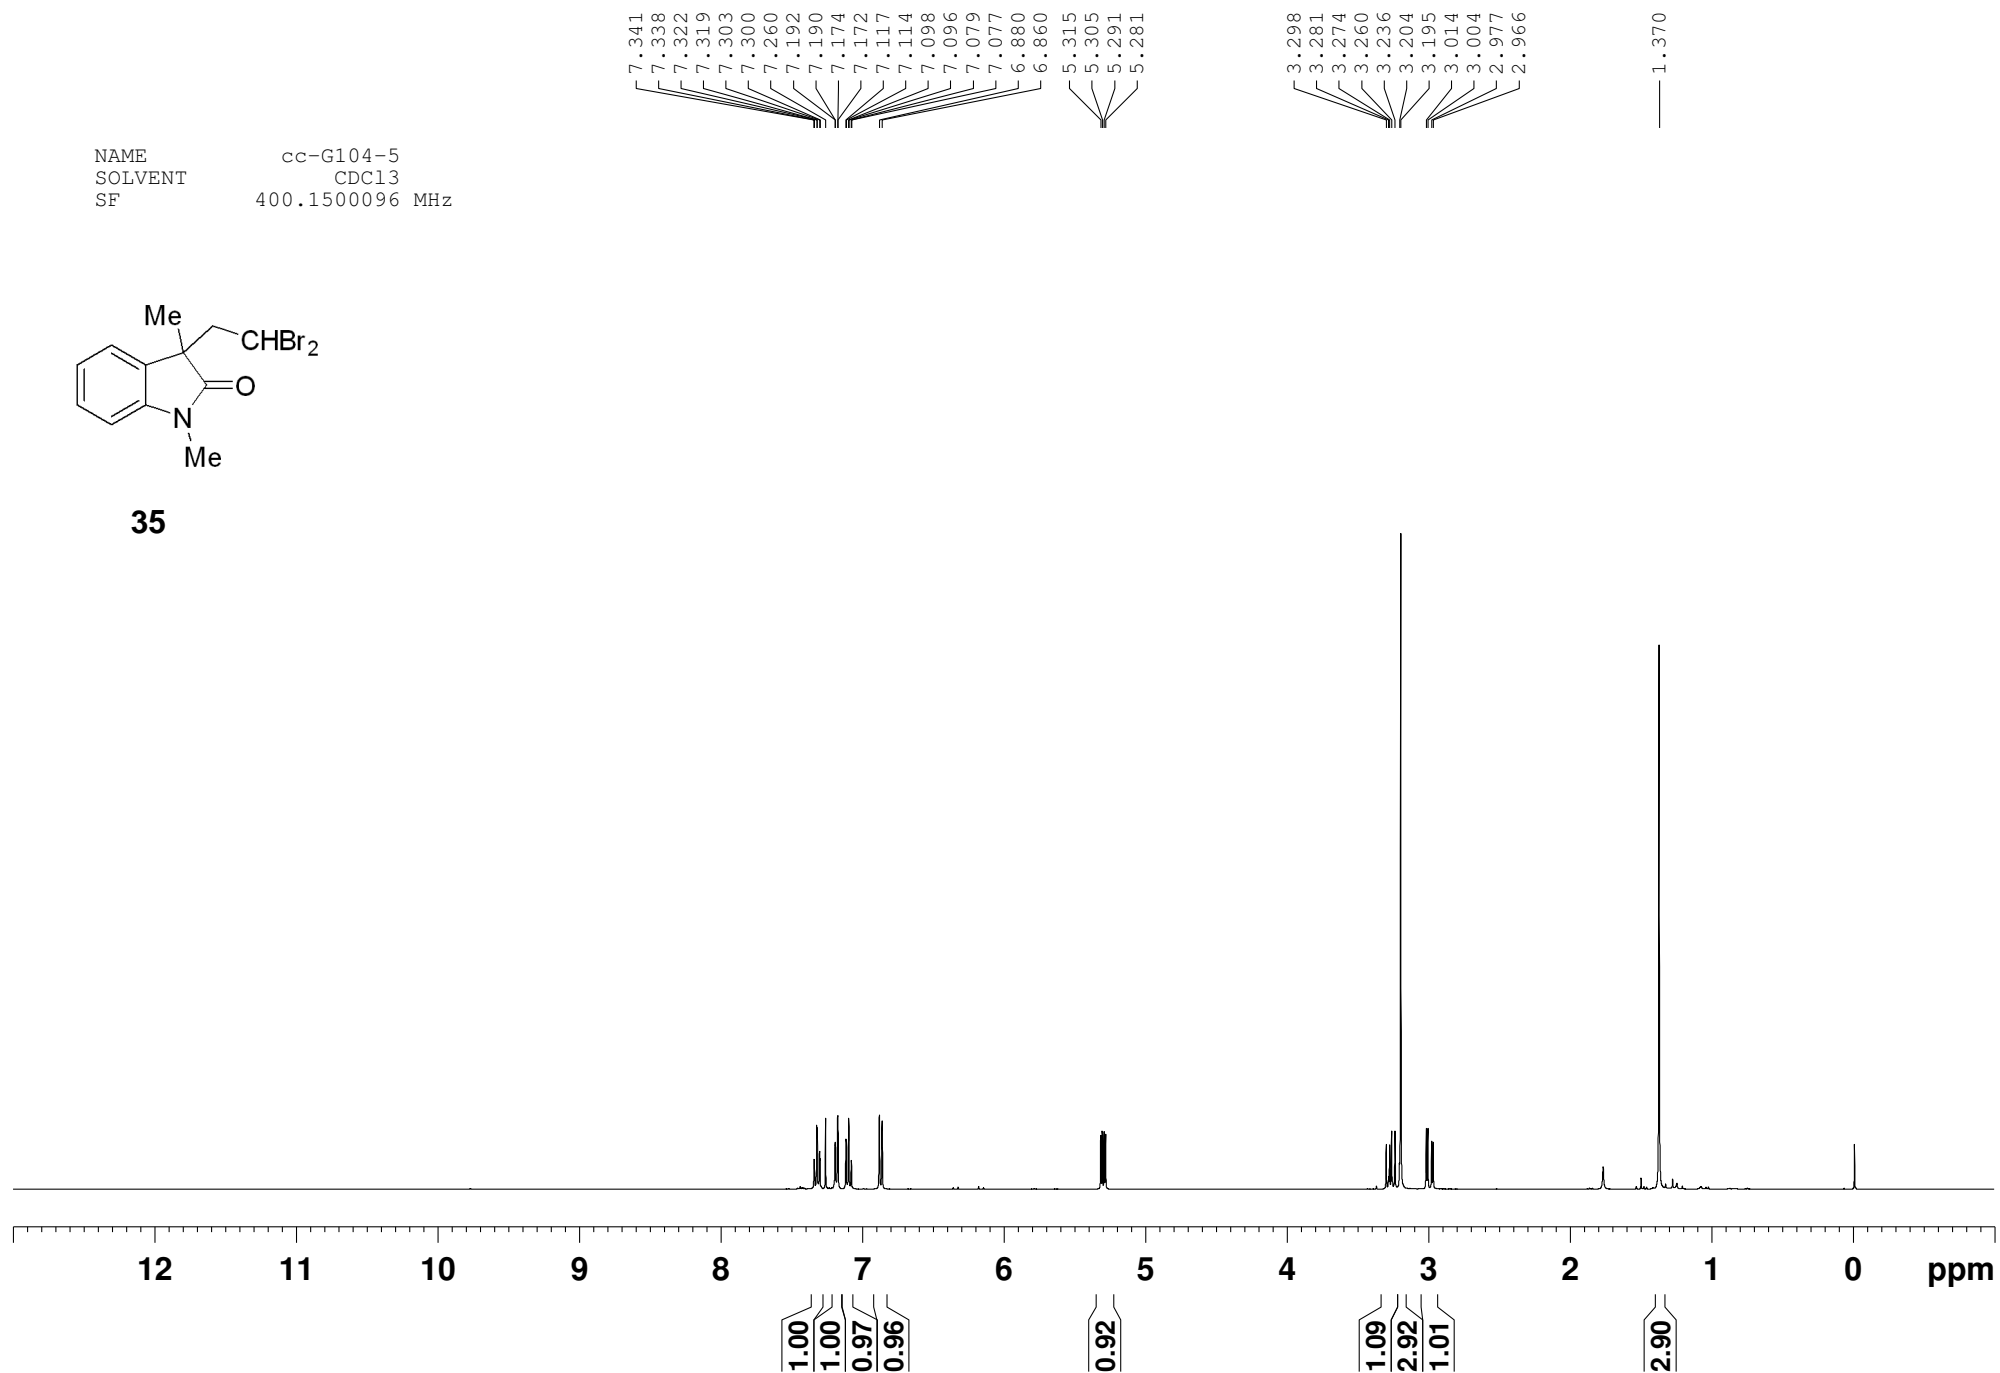

178.77

143.52

130.68

128.60

122.62

108.60

77.32

77.00

76.68

51.52

48.54

39.64

26.48

25.60

NAME cc-I94-1-C  
SOLVENT CDCl3  
SF 100.6127761 MHz

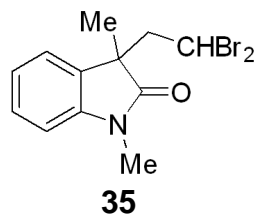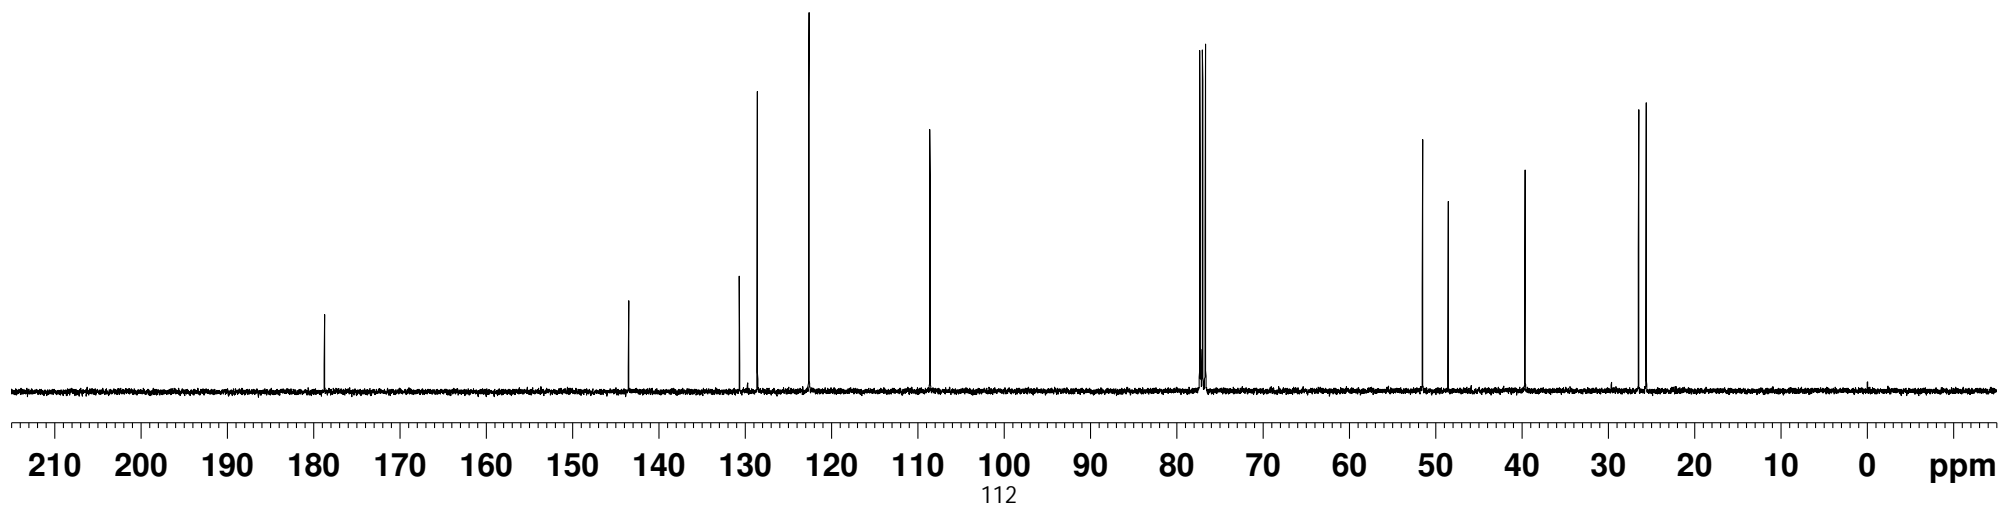



NAME cc-g104-12  
SOLVENT CDC13  
SFO1 400.1524711 MHz

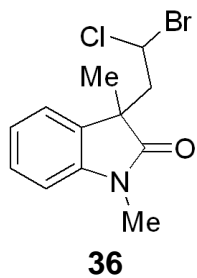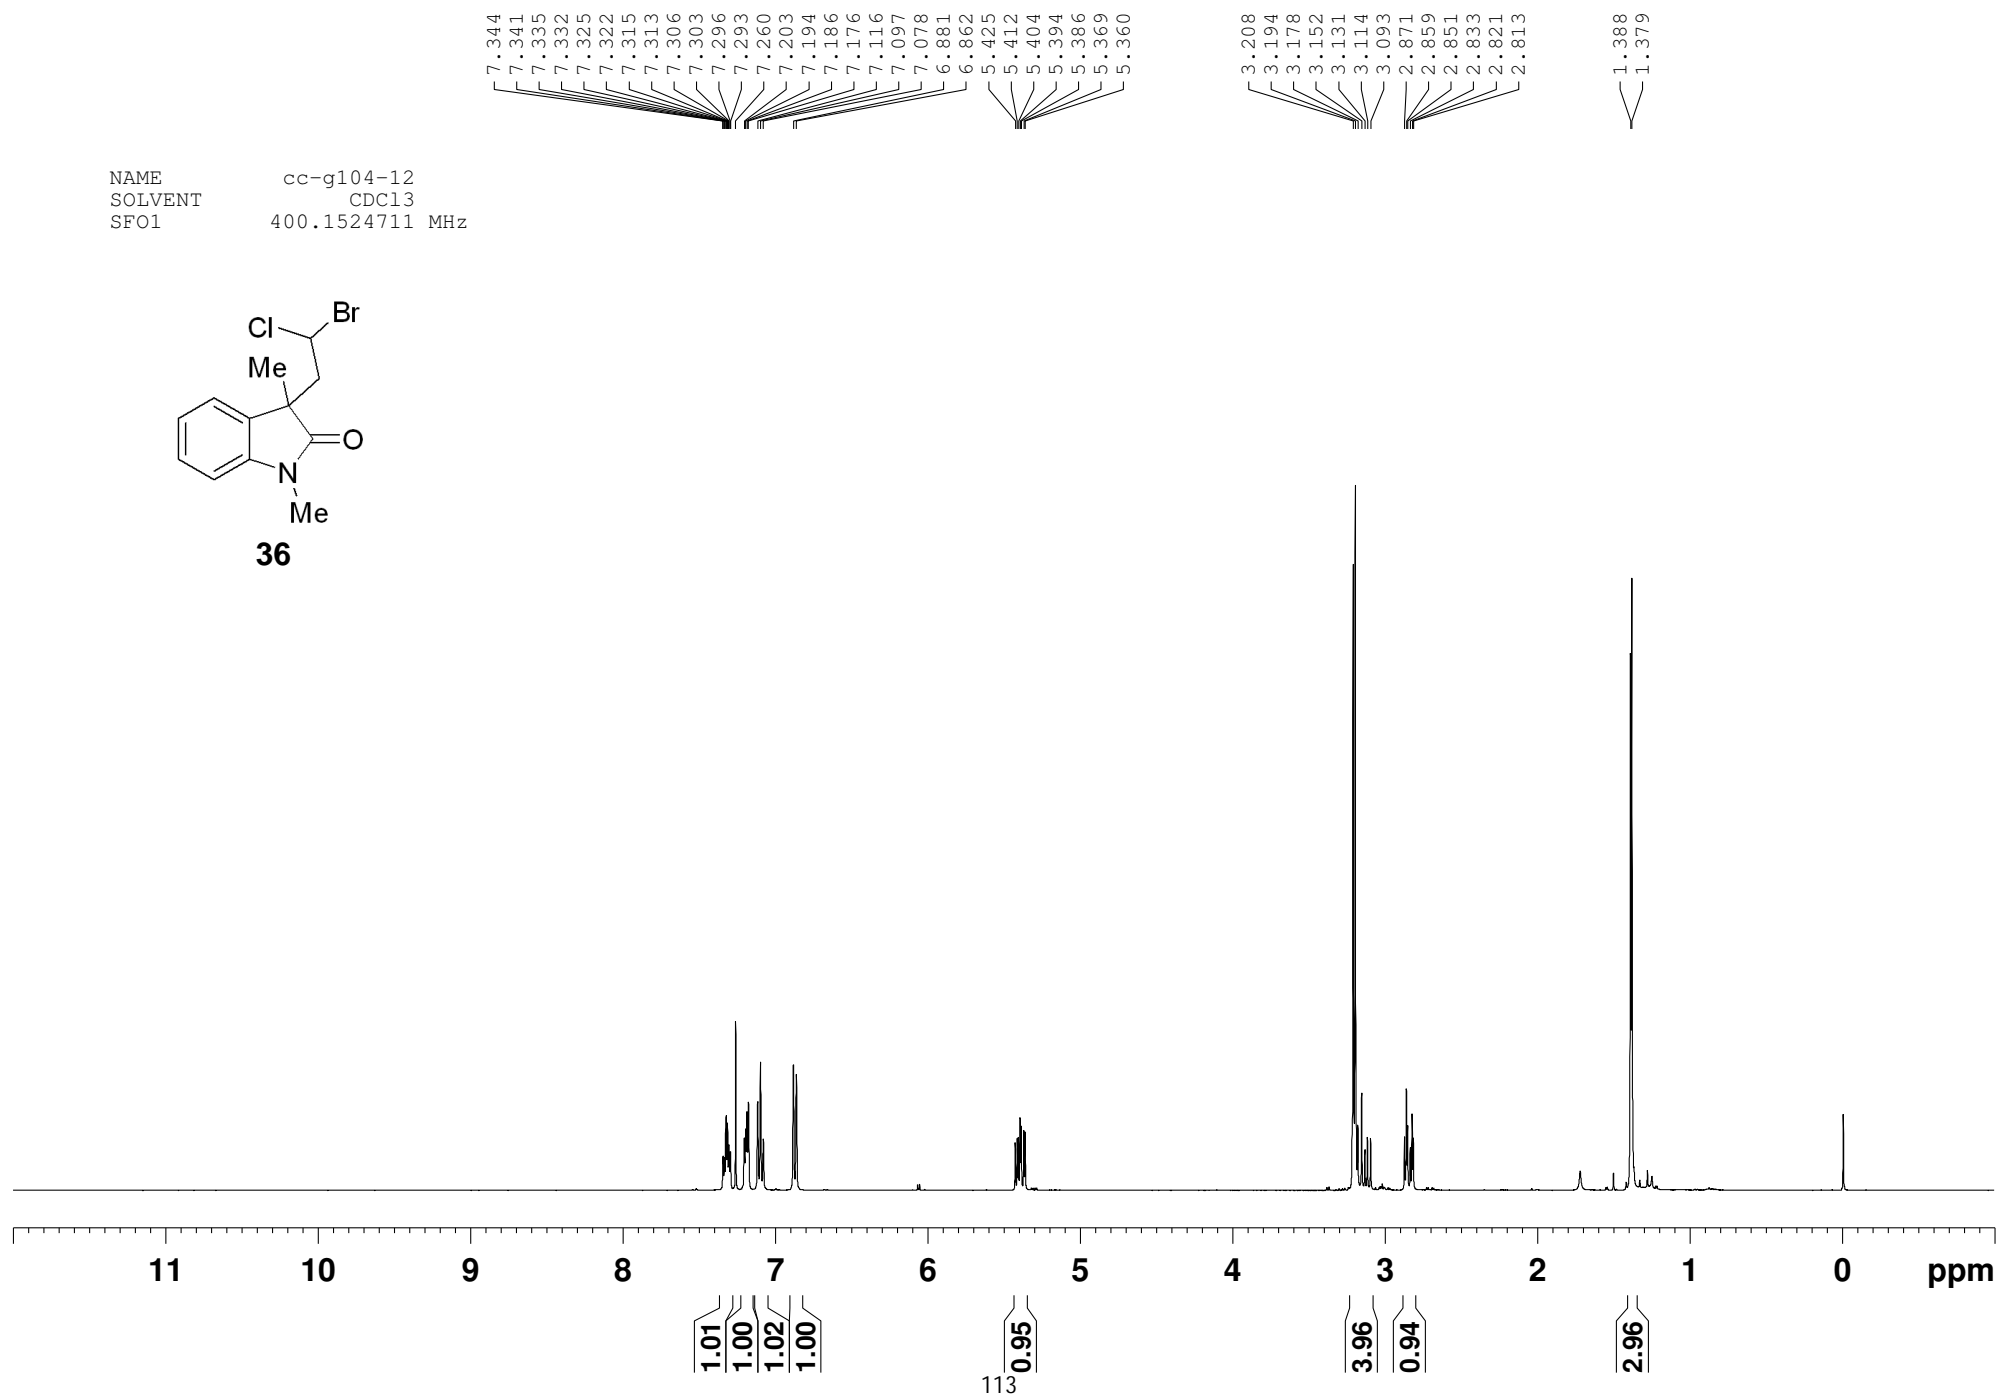

178.99  
178.74

143.50  
143.36

131.11  
130.67  
128.64  
128.54  
122.66  
122.64  
122.61

108.60  
108.56

77.31  
77.00  
76.68

55.70  
55.64  
51.13  
50.76  
47.95  
47.78

26.44  
25.59  
25.33

NAME cc-g104-12  
SOLVENT CDCl3  
SF 100.6178037 MHz

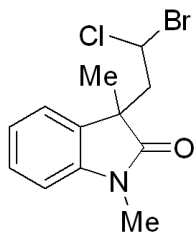

36

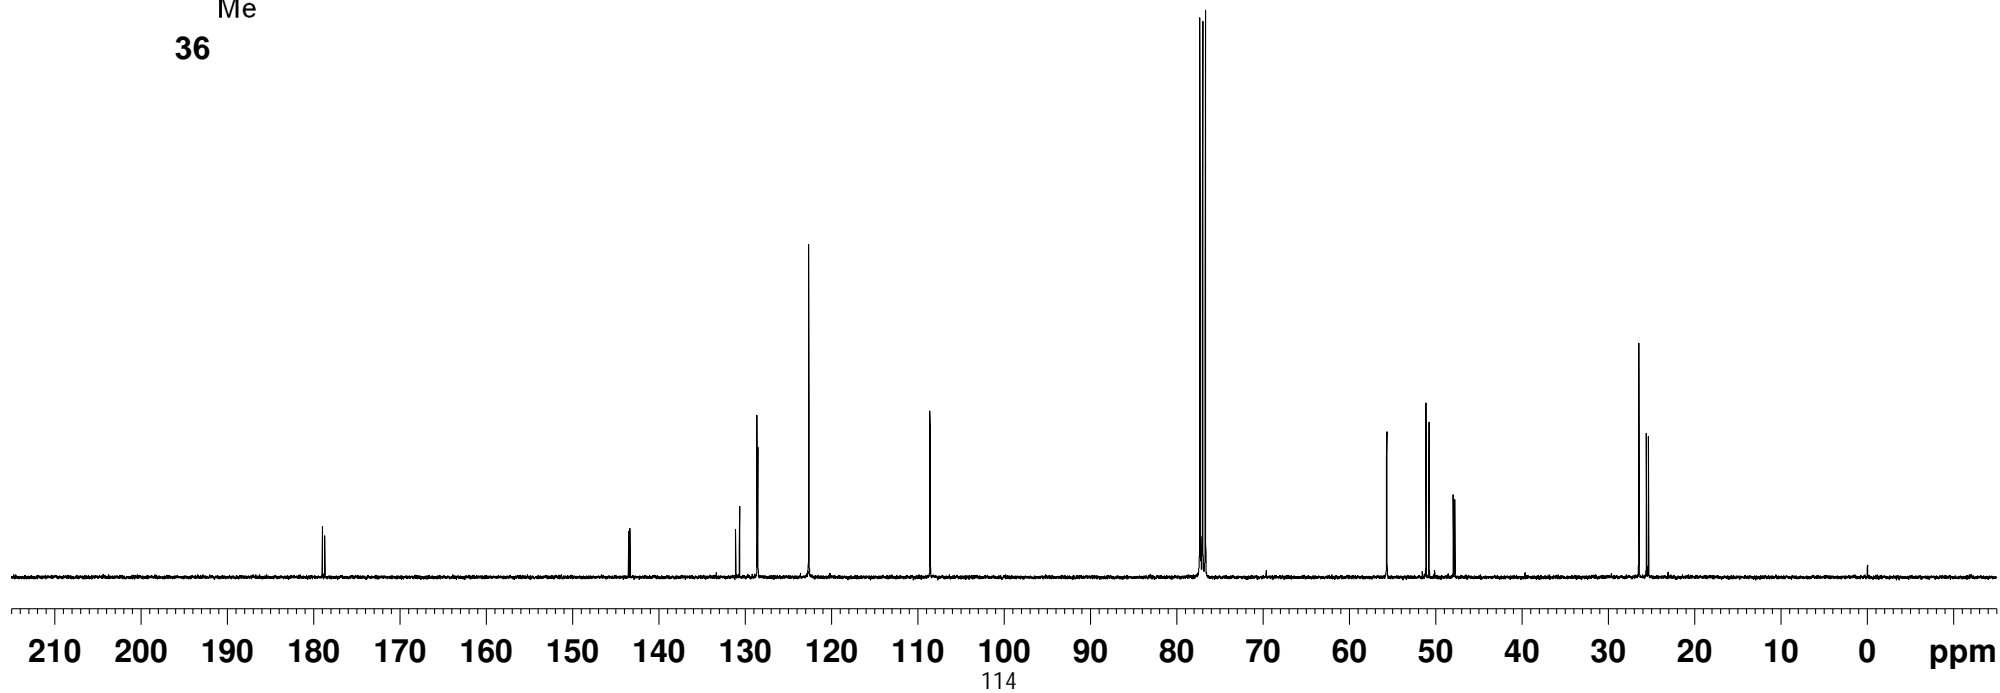

7.340  
7.337  
7.320  
7.317  
7.304  
7.301  
7.298  
7.285  
7.282  
7.260  
7.232  
7.211  
7.191  
7.113  
7.095  
7.076  
6.881  
6.861  
6.297  
6.285  
6.278  
6.267  
6.260  
6.255  
6.235  
6.230  
6.171  
6.159  
6.152  
6.141  
6.133  
6.128  
6.108  
6.103  
3.229  
3.204  
3.139  
3.113  
3.101  
3.087  
3.075  
3.050  
2.920  
2.902  
2.891  
2.883  
2.872  
2.864  
2.853  
2.835  
2.813  
2.801  
2.775  
2.764  
2.746  
2.735  
2.709  
2.697  
2.578  
2.573  
2.541  
2.536  
2.484  
2.479  
2.447  
2.442  
1.417  
1.406

NAME cc-i94-4-H  
SOLVENT CDCl3  
SF 400.1500090 MHz

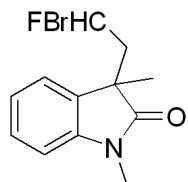

37

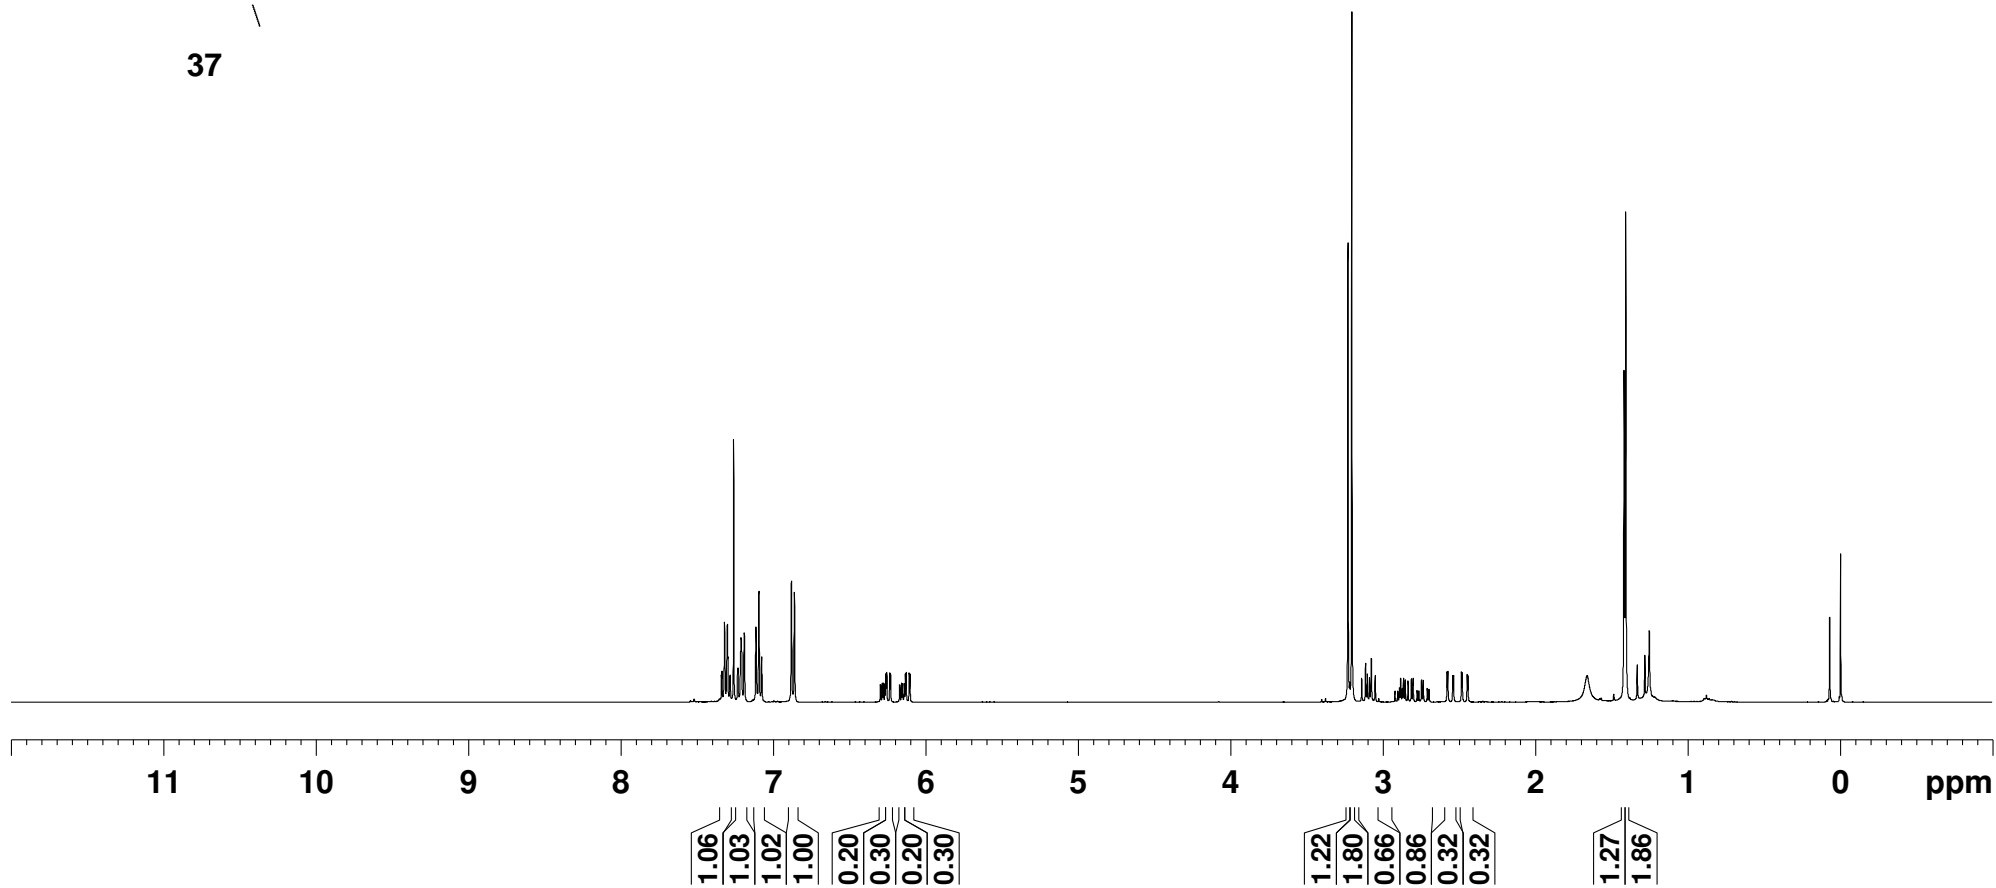

179.00  
178.70

143.26  
142.85

131.77  
131.25  
128.64  
128.42  
122.89  
122.77  
122.72  
122.70

108.52  
108.48

92.75  
92.32  
90.23  
89.80

77.32  
77.00  
76.68

48.57  
48.38  
47.69  
47.50  
47.02  
46.91  
46.88

26.38  
26.33  
24.74  
24.04

NAME cc-i94-4  
SOLVENT CDC13  
SF 100.6178006 MHz

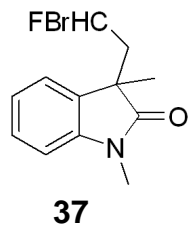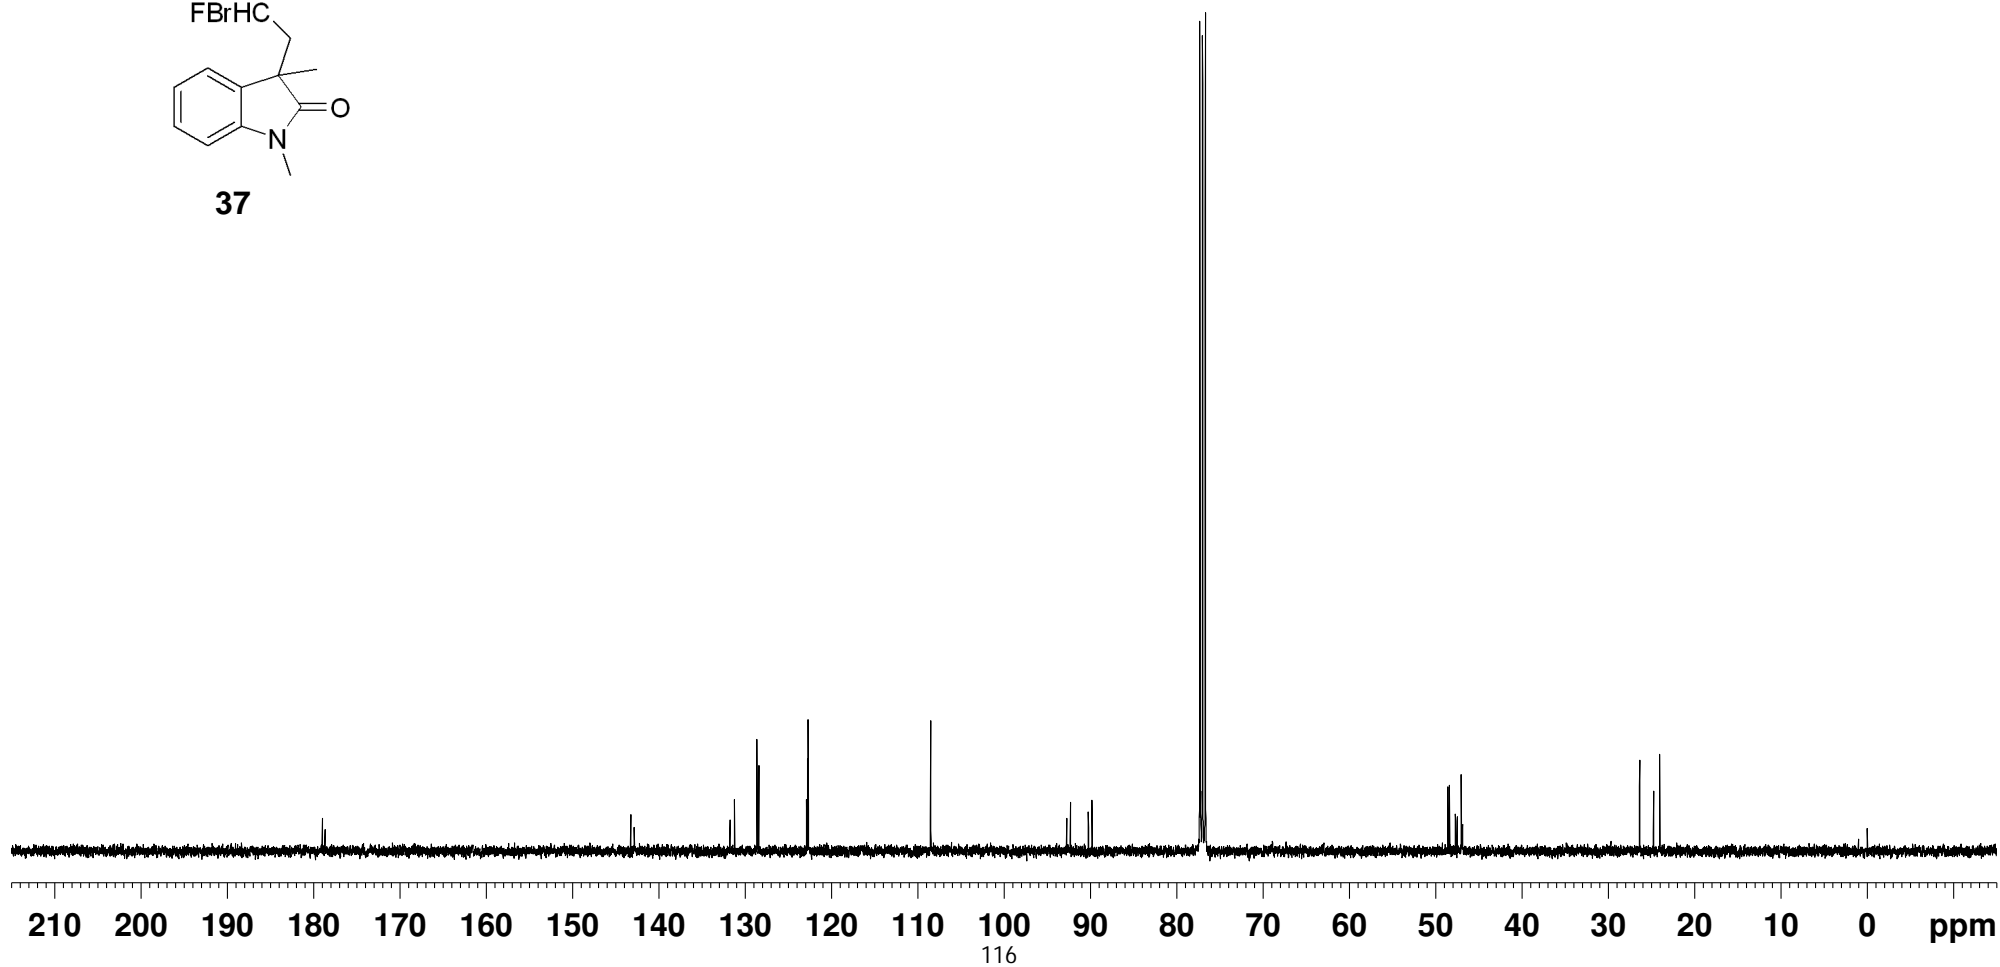

NAME cc-i94-4  
SOLVENT CDCl3  
SF 376.5171850 MHz

-130.128  
-133.763

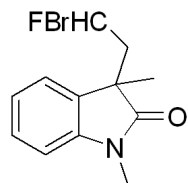

**38**

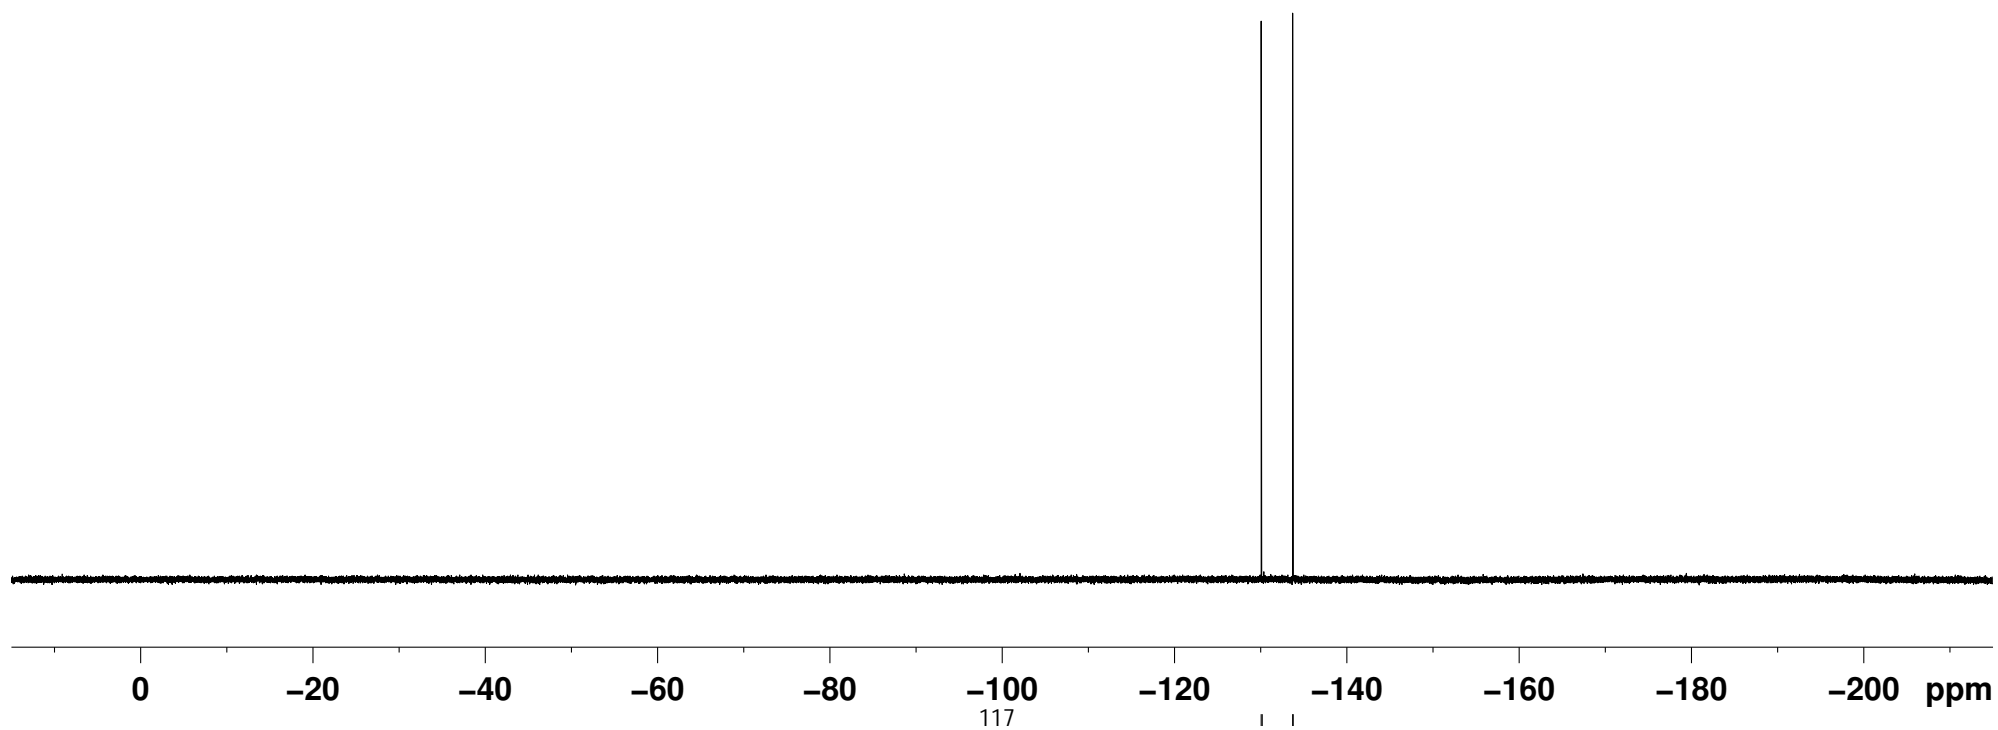

NAME cc-i94-3  
SOLVENT CDC13  
SF 400.1500069 MHz

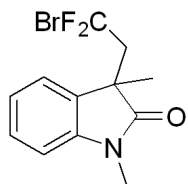

38

7.327  
7.324  
7.308  
7.305  
7.288  
7.285  
7.267  
7.251  
7.102  
7.100  
7.083  
7.081  
7.064  
7.062  
6.886  
6.866

3.341  
3.321  
3.302  
3.283  
3.268  
3.263  
3.233  
3.224  
3.095  
3.077  
3.057  
3.039  
3.020  
3.000  
2.982

1.383

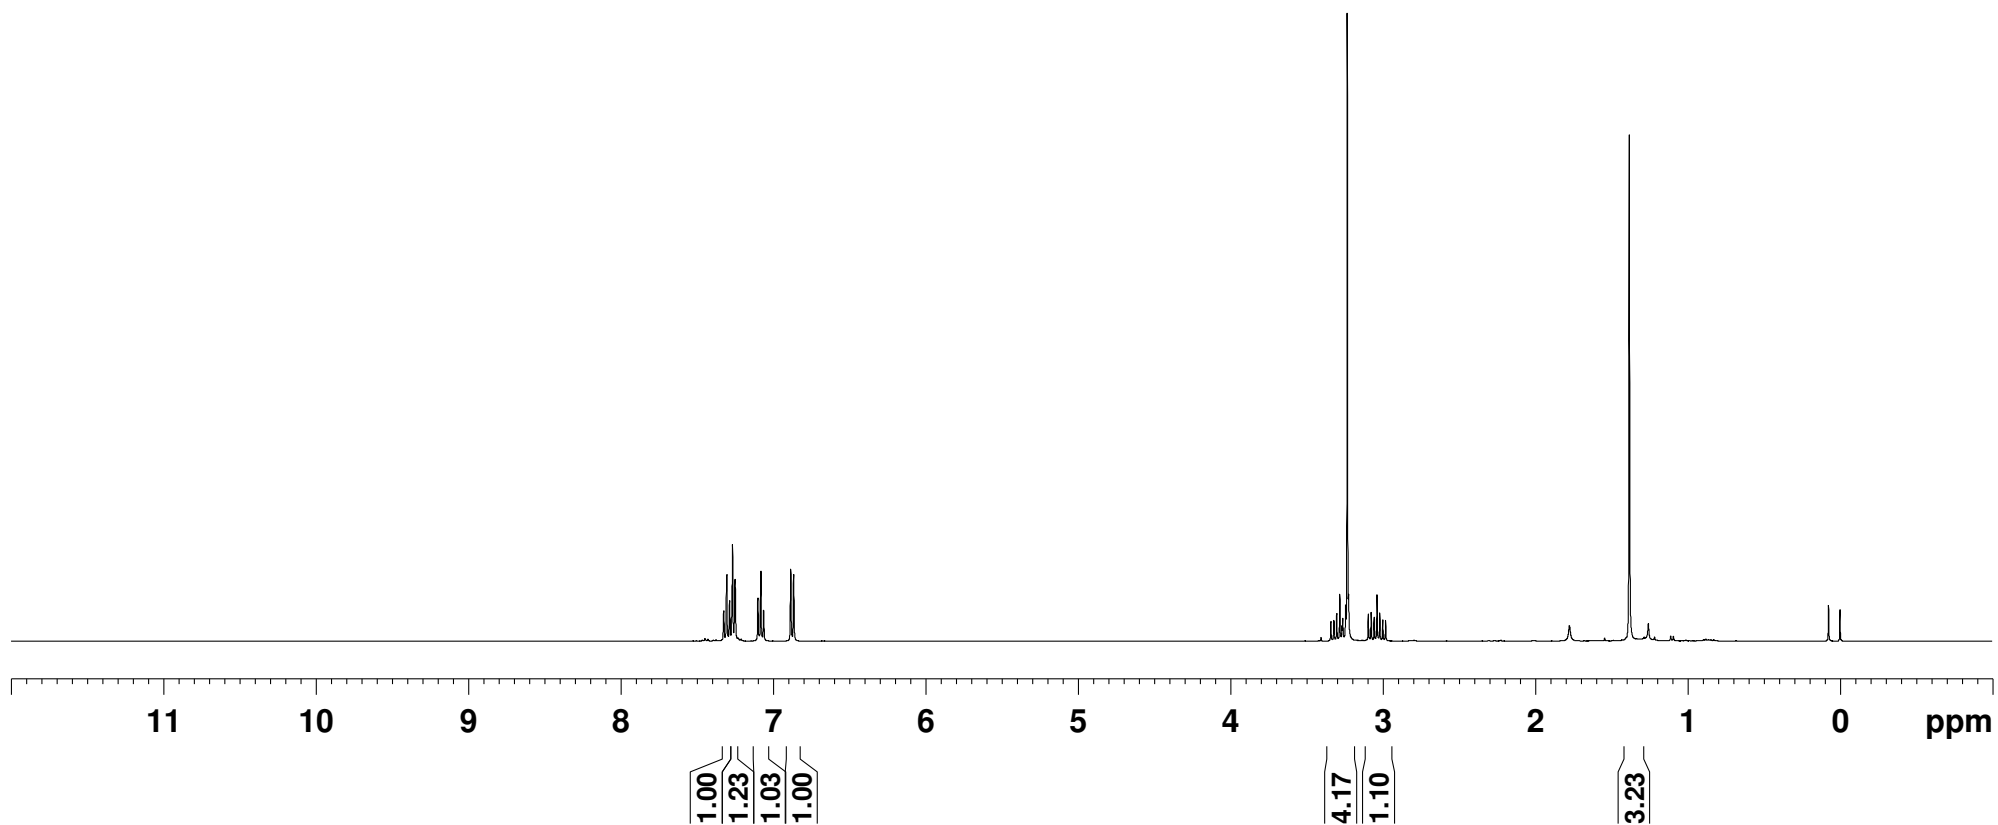

NAME cc-i94-3  
SOLVENT CDCl3  
SF 100.6178030 MHz

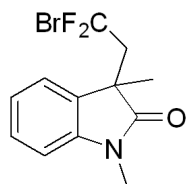

39

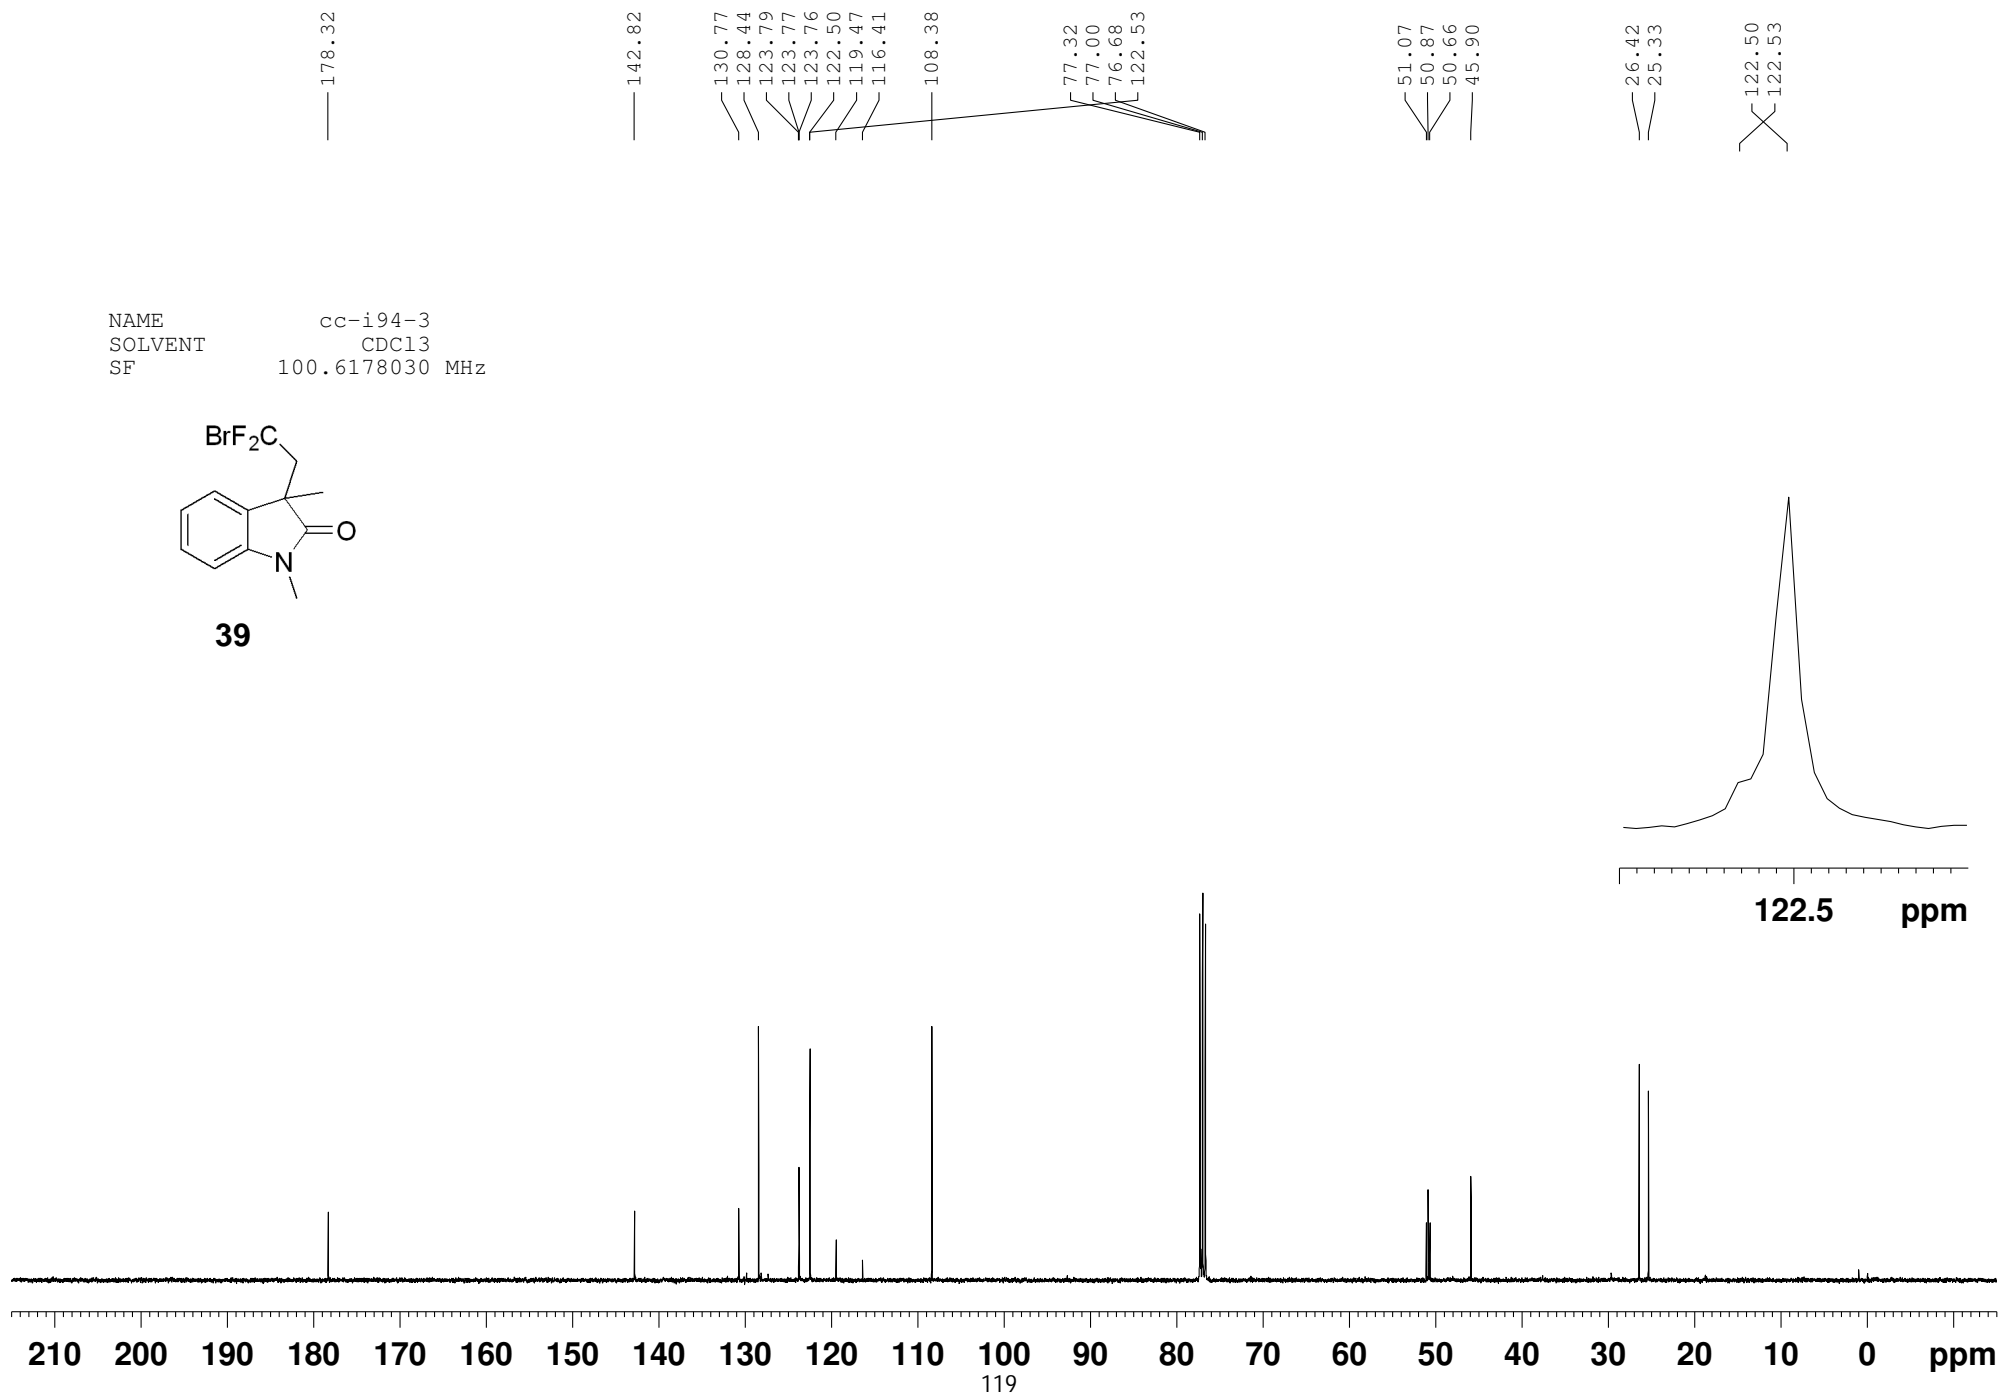

-39.669  
-40.080  
-43.649  
-44.060

NAME cc-i94-3-0930  
SOLVENT CDCl3  
SF 376.5171850 MHz

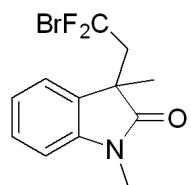

38

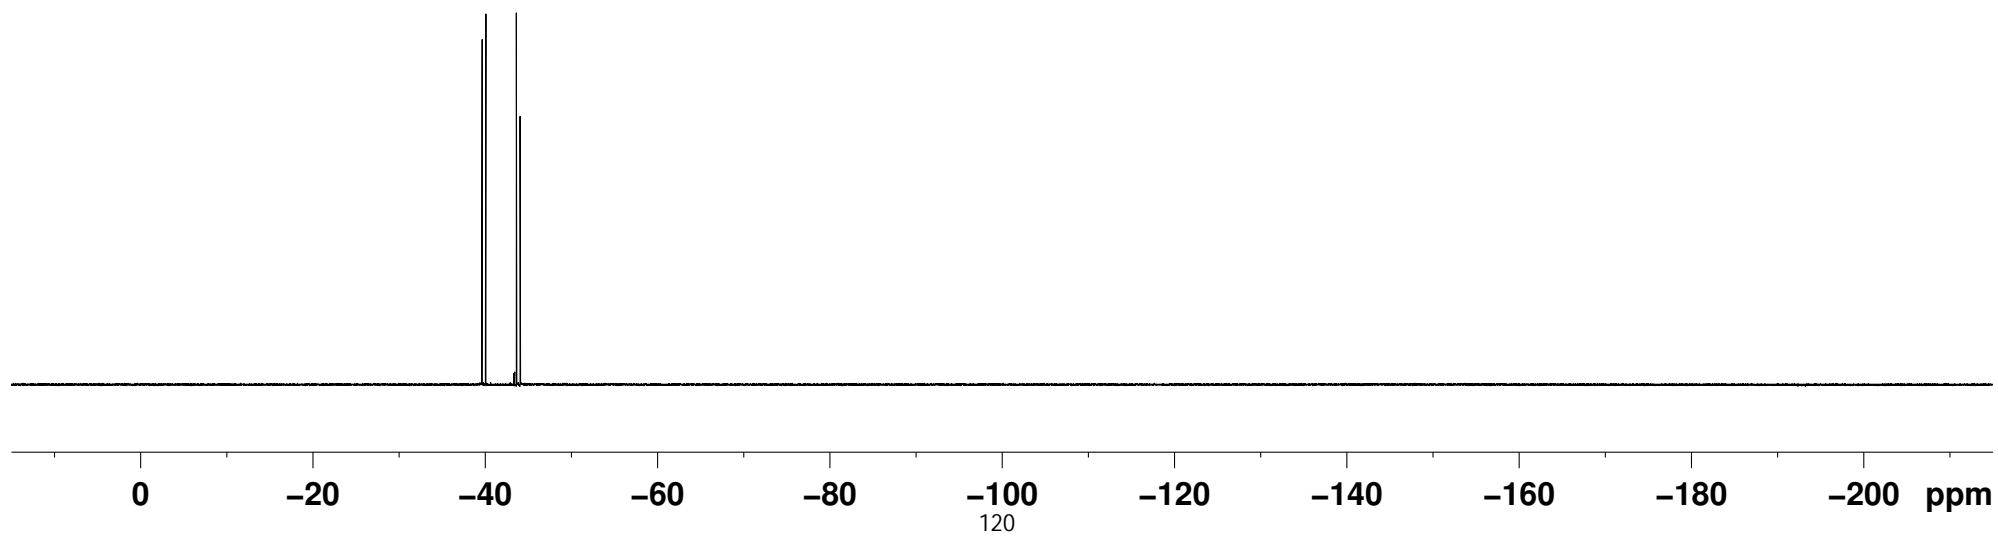



7.351  
7.347  
7.332  
7.328  
7.312  
7.309  
7.260  
7.173  
7.170  
7.154  
7.152  
7.122  
7.120  
7.103  
7.101  
7.085  
6.880  
6.861

4.703  
4.691  
4.679  
4.667

3.377  
3.353  
3.339  
3.314  
3.205  
3.193  
3.167  
3.155

1.309

NAME cc-i94-6  
SOLVENT CDCl3  
SF 400.1500095 MHz

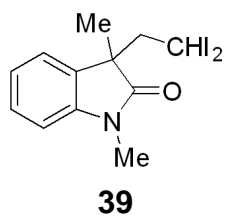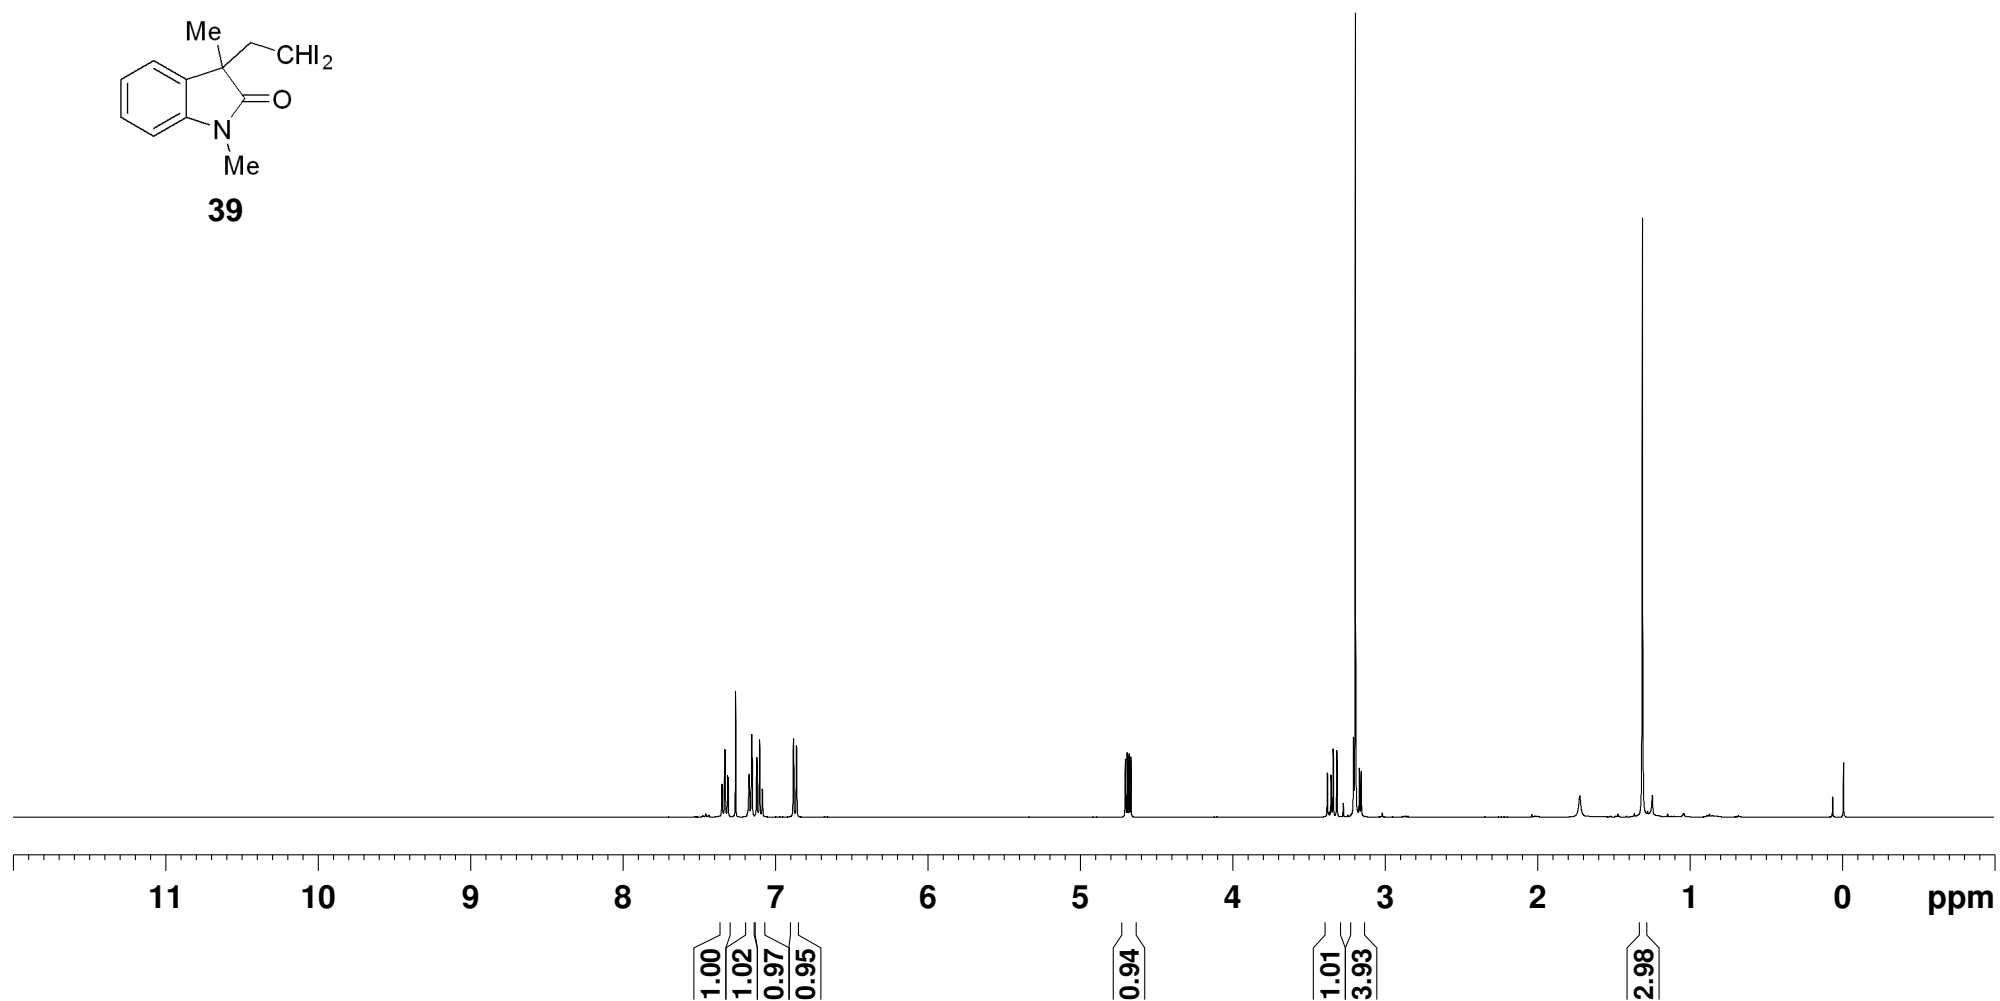

NAME cc-i94-6-0930  
SOLVENT CDCl3  
SF 100.6178033 MHz

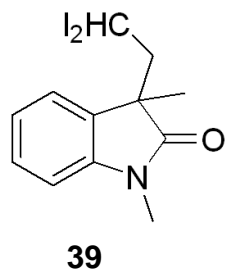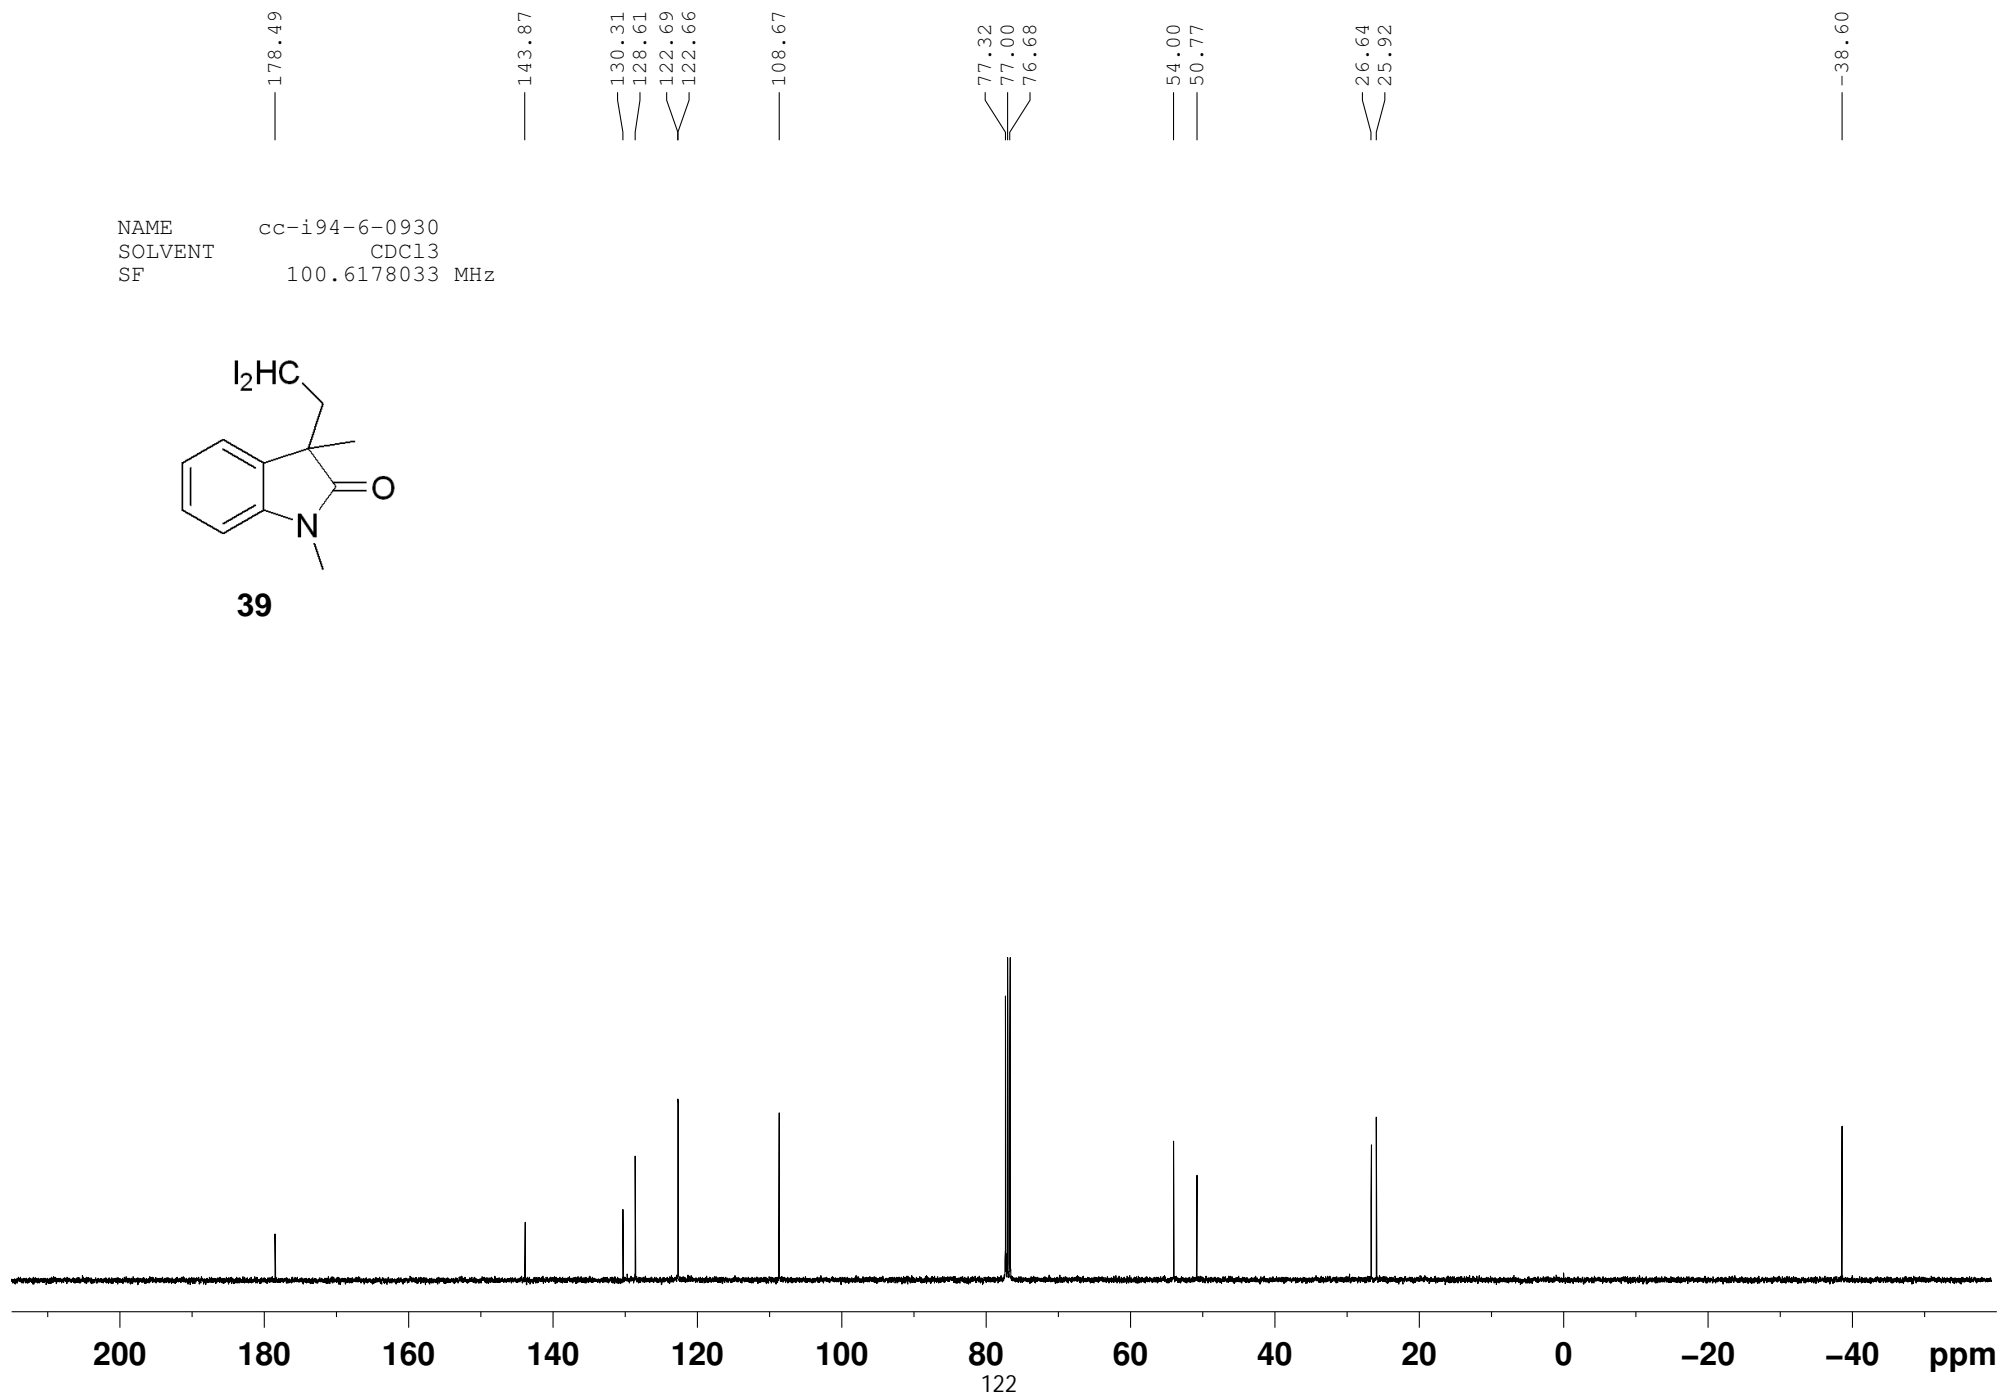

NAME cc-g135-1214  
SOLVENT CDCl3  
SF 400.1500095 MHz

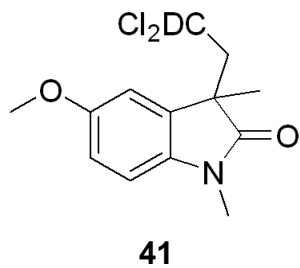

7.260  
6.828  
6.822  
6.807  
6.801  
6.791  
6.786  
6.767  
6.746

3.791

3.156  
3.010  
2.973  
2.667  
2.630

1.359

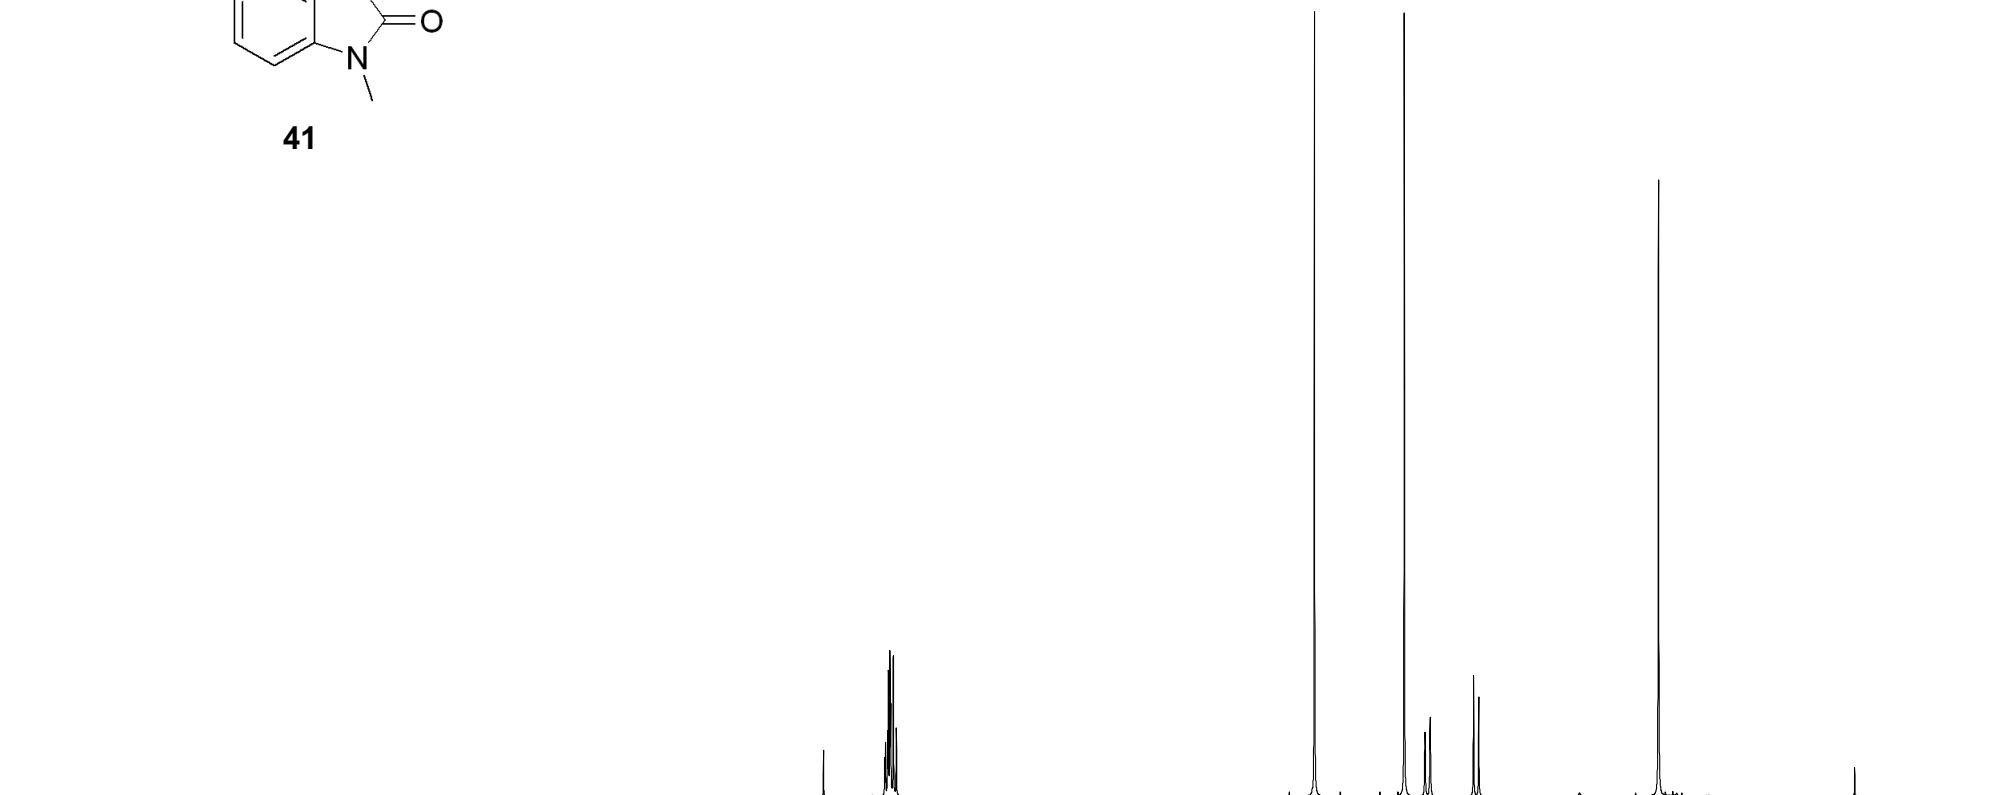

12

11

10

9

8

6

5

4

3

2

1

0

ppm

3.00

3.06

3.06

1.05

1.02

3.11

— 178.50

— 156.03

— 136.80

— 132.38

— 112.28

— 110.41

— 108.80

— 77.32

— 77.00

— 76.68

— 69.59

— 69.32

— 69.05

— 55.74

— 49.89

— 47.45

— 26.43

— 25.38

NAME cc-g135-1214  
SOLVENT CDCl3  
SF 100.6178074 MHz

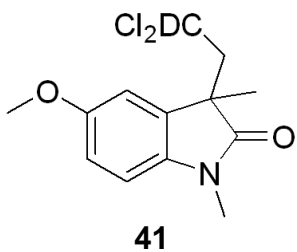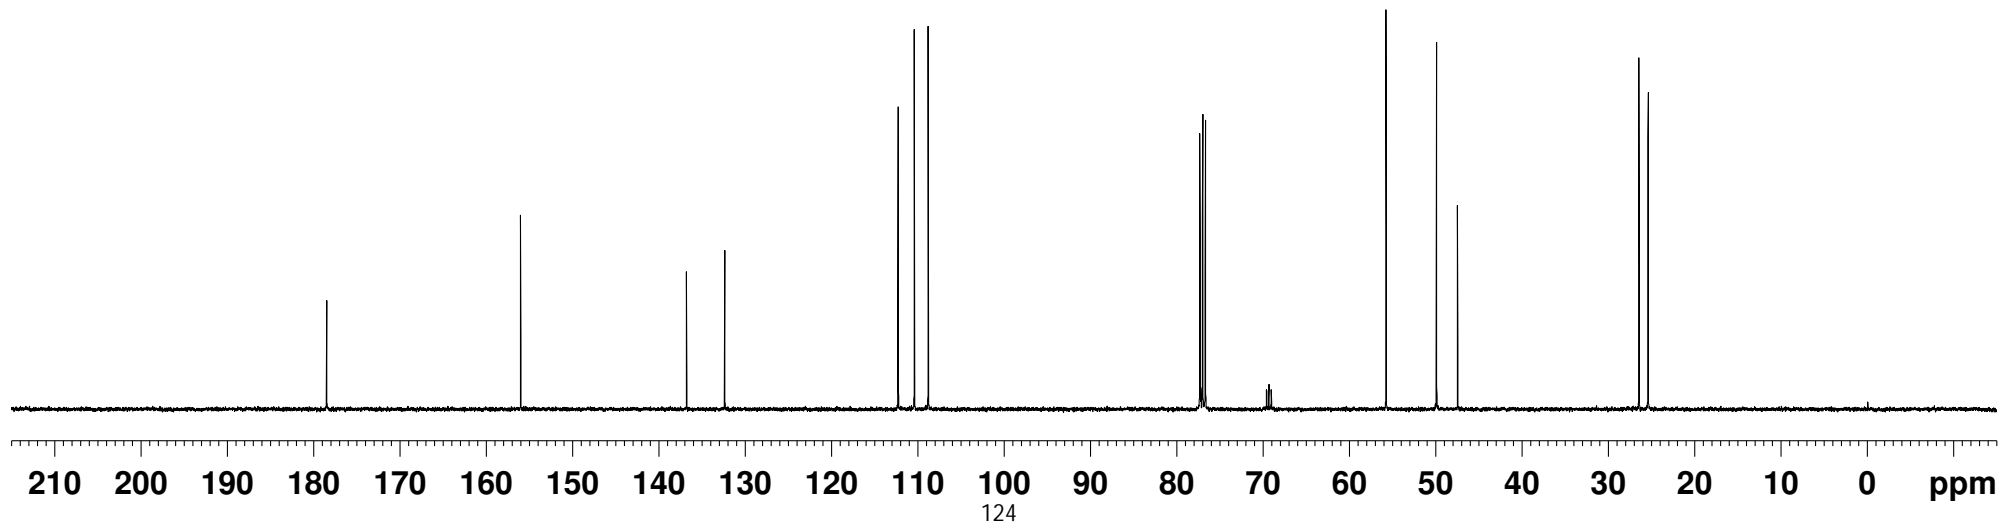

NAME cc-G156  
SOLVENT CDC13  
SF 400.1500099 MHz

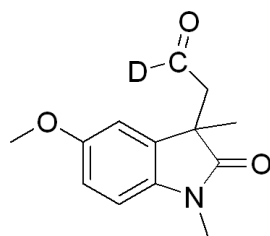

42

7.260  
6.810  
6.805  
6.800  
6.793  
6.787  
6.784  
6.761

3.781

3.236  
2.996  
2.953  
2.924  
2.881

1.408

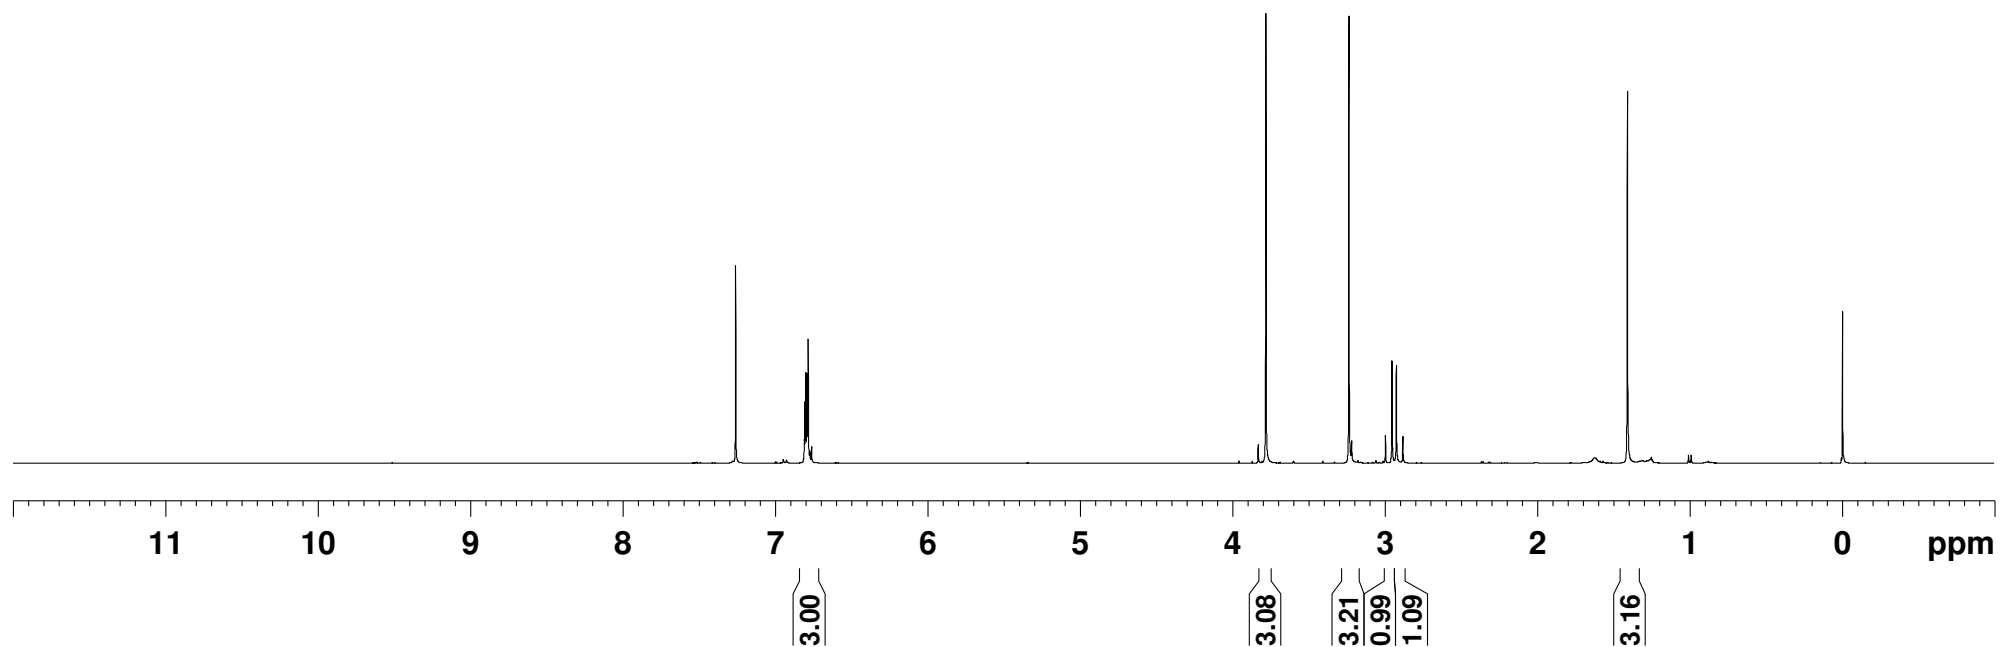

198.52  
198.26  
197.99

178.89

155.83

136.41  
133.91

111.85  
110.05  
108.39

77.32  
77.00  
76.68

55.47  
50.11  
50.07  
50.04  
45.07

26.19  
23.72

NAME CC-G156-0107  
SOLVENT CDCl3  
SF 100.6178213 MHz

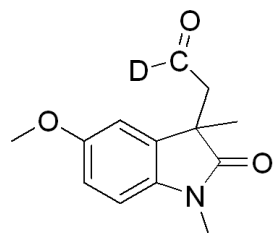

42

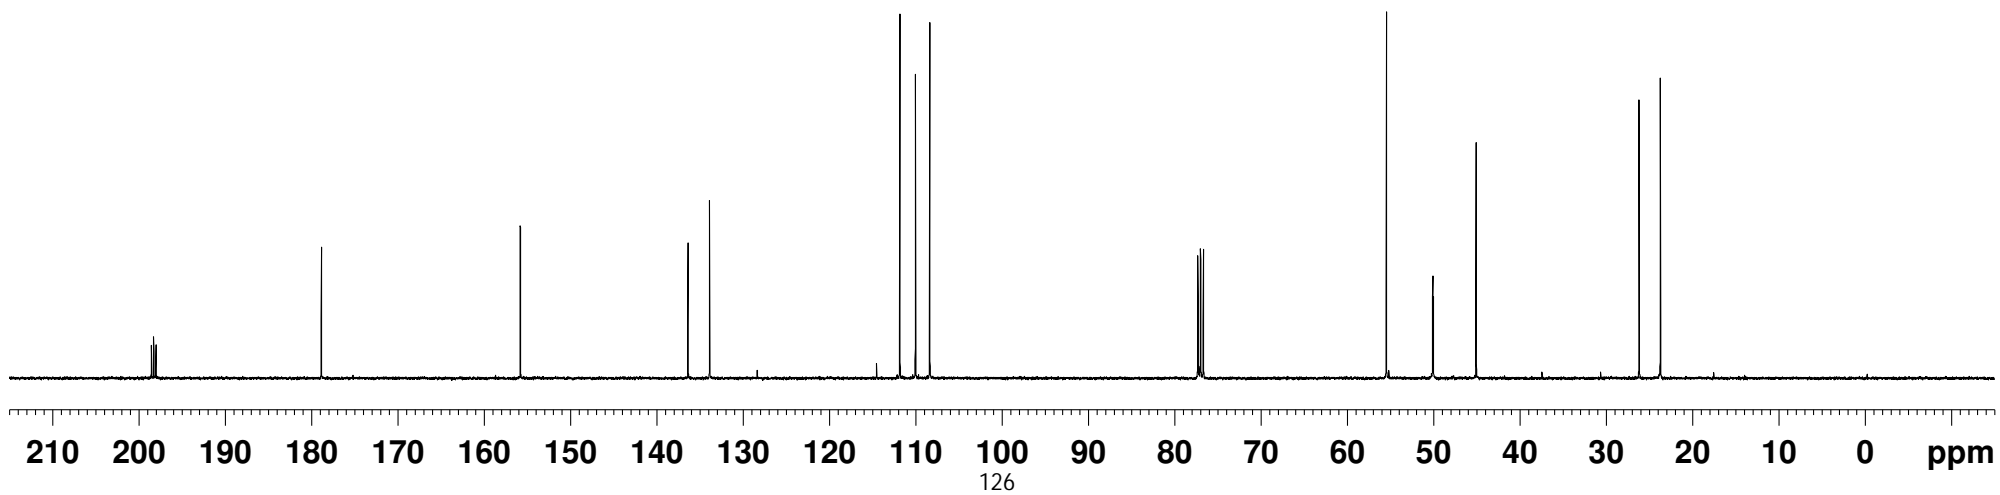

NAME cc-h9  
SOLVENT CDC13  
SF 400.1500104 MHz

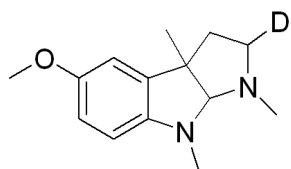

43

7.260  
6.664  
6.658  
6.644  
6.636  
6.630  
6.364  
6.343

4.058  
4.047  
3.741

2.886  
2.713  
2.699  
2.687  
2.632  
2.613  
2.594  
2.532  
1.947  
1.929

1.433

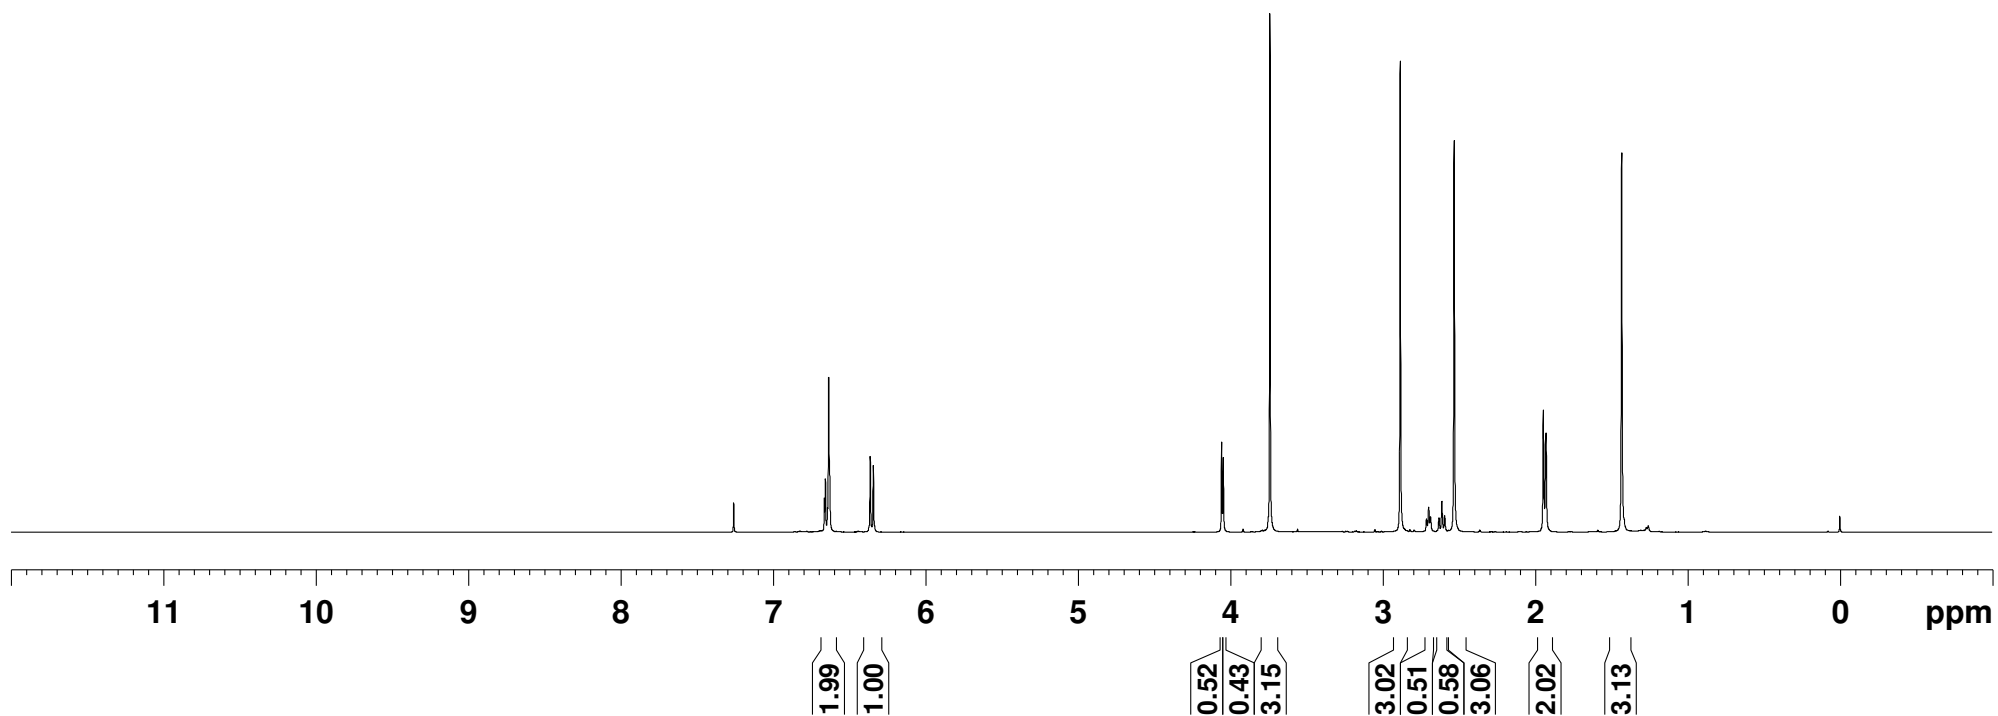

NAME cc-h9-C  
SOLVENT CDC13  
SF 100.6178081 MHz

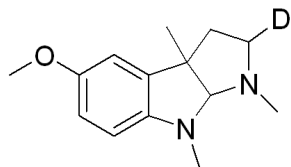

43

152.89  
146.50  
146.43  
138.17

112.10  
109.71  
107.40  
98.29  
98.24

77.32  
77.00  
76.69

55.92  
52.96  
52.77  
52.74  
52.67  
52.53  
40.66  
40.60  
38.11  
38.01  
37.92  
37.85  
27.37  
27.34  
52.98  
52.57

52.96  
52.77  
52.74  
52.67  
52.53  
52.98  
52.57

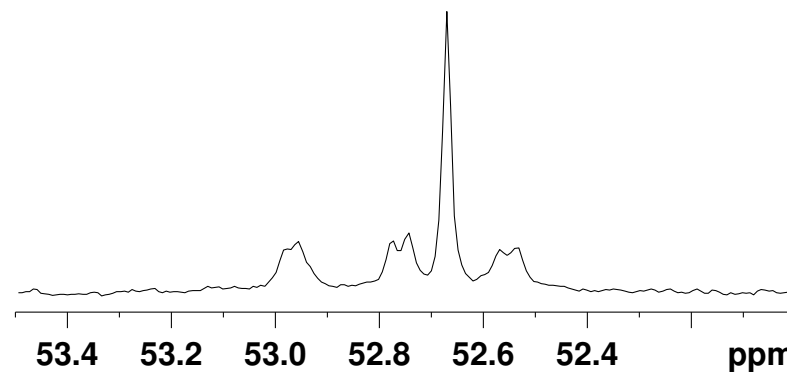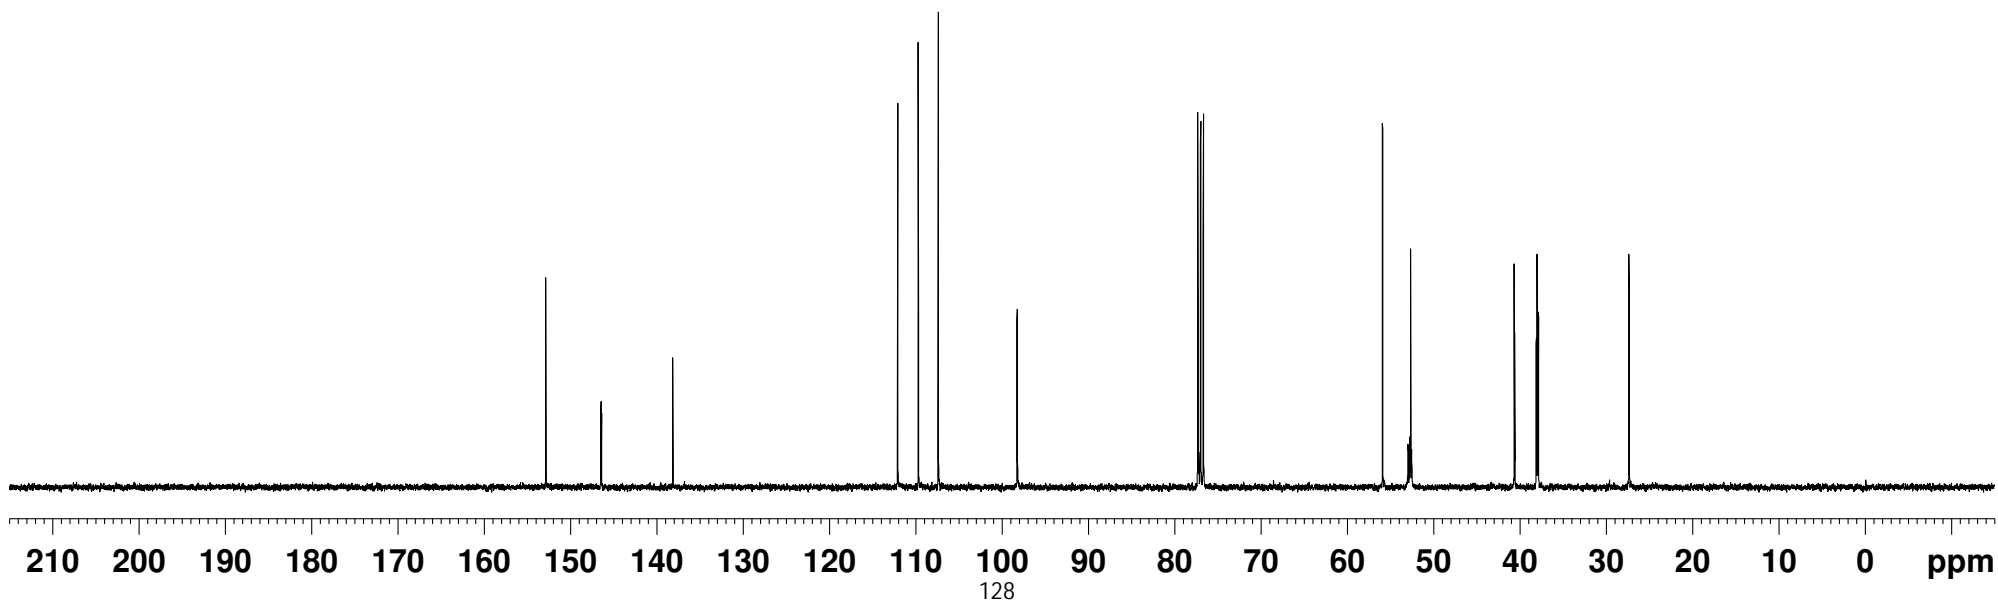



NAME cc-I78-2  
SOLVENT CDCl3  
SF 400.1500093 MHz

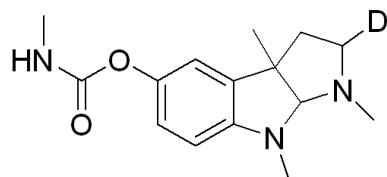

44

6.807  
6.802  
6.786  
6.781  
6.754  
6.748  
6.345  
6.324  
4.974  
4.966  
4.159  
4.150  
2.913  
2.862  
2.850  
2.743  
2.732  
2.719  
2.626  
2.607  
2.588  
1.960  
1.942  
1.420

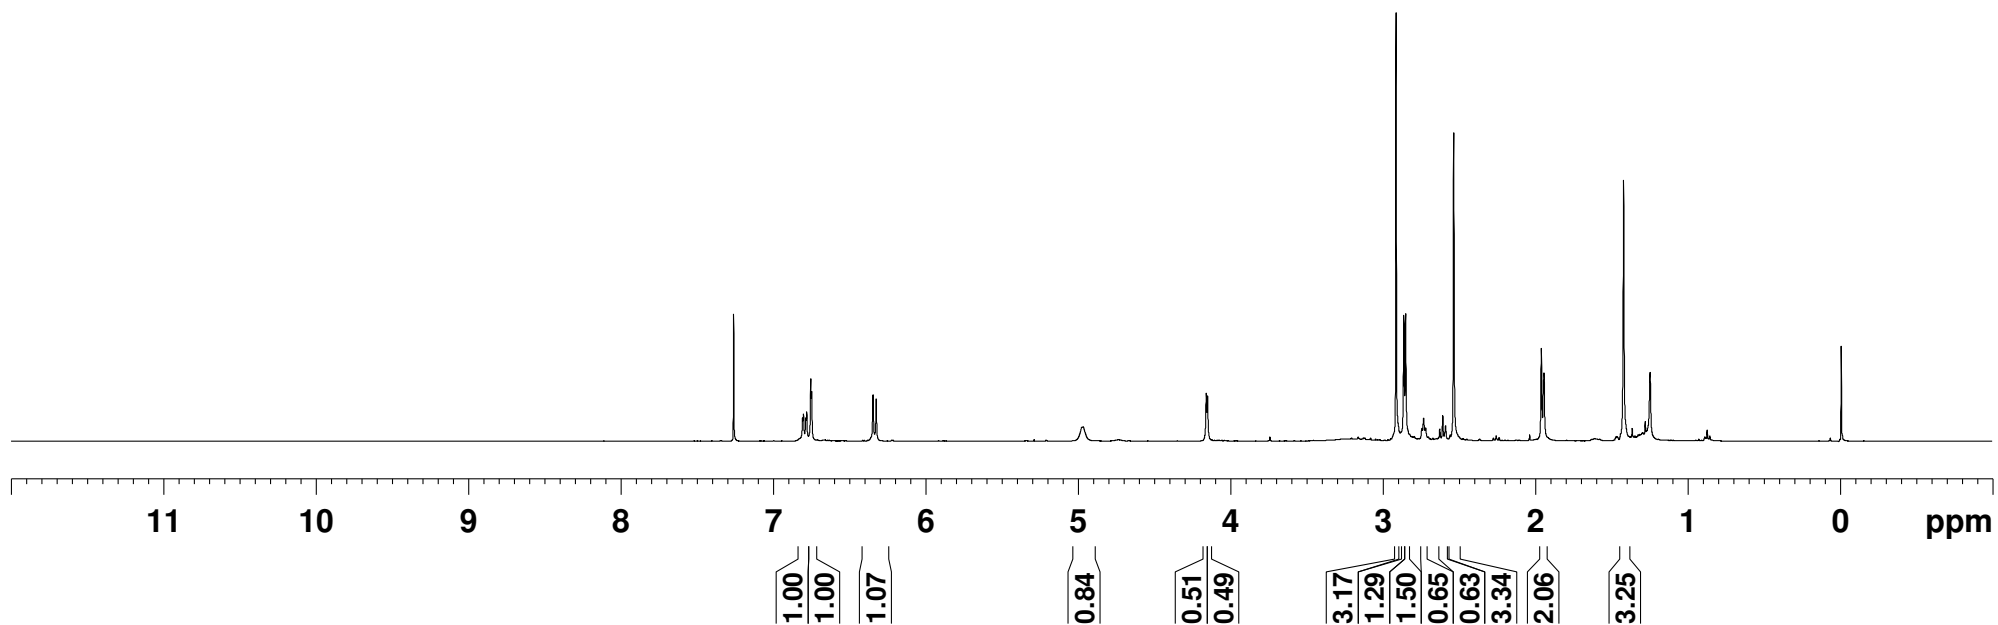

NAME cc-I78-2-c  
SOLVENT CDCl3  
SF 100.6178030 MHz

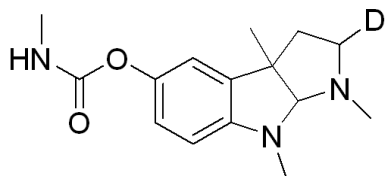

44

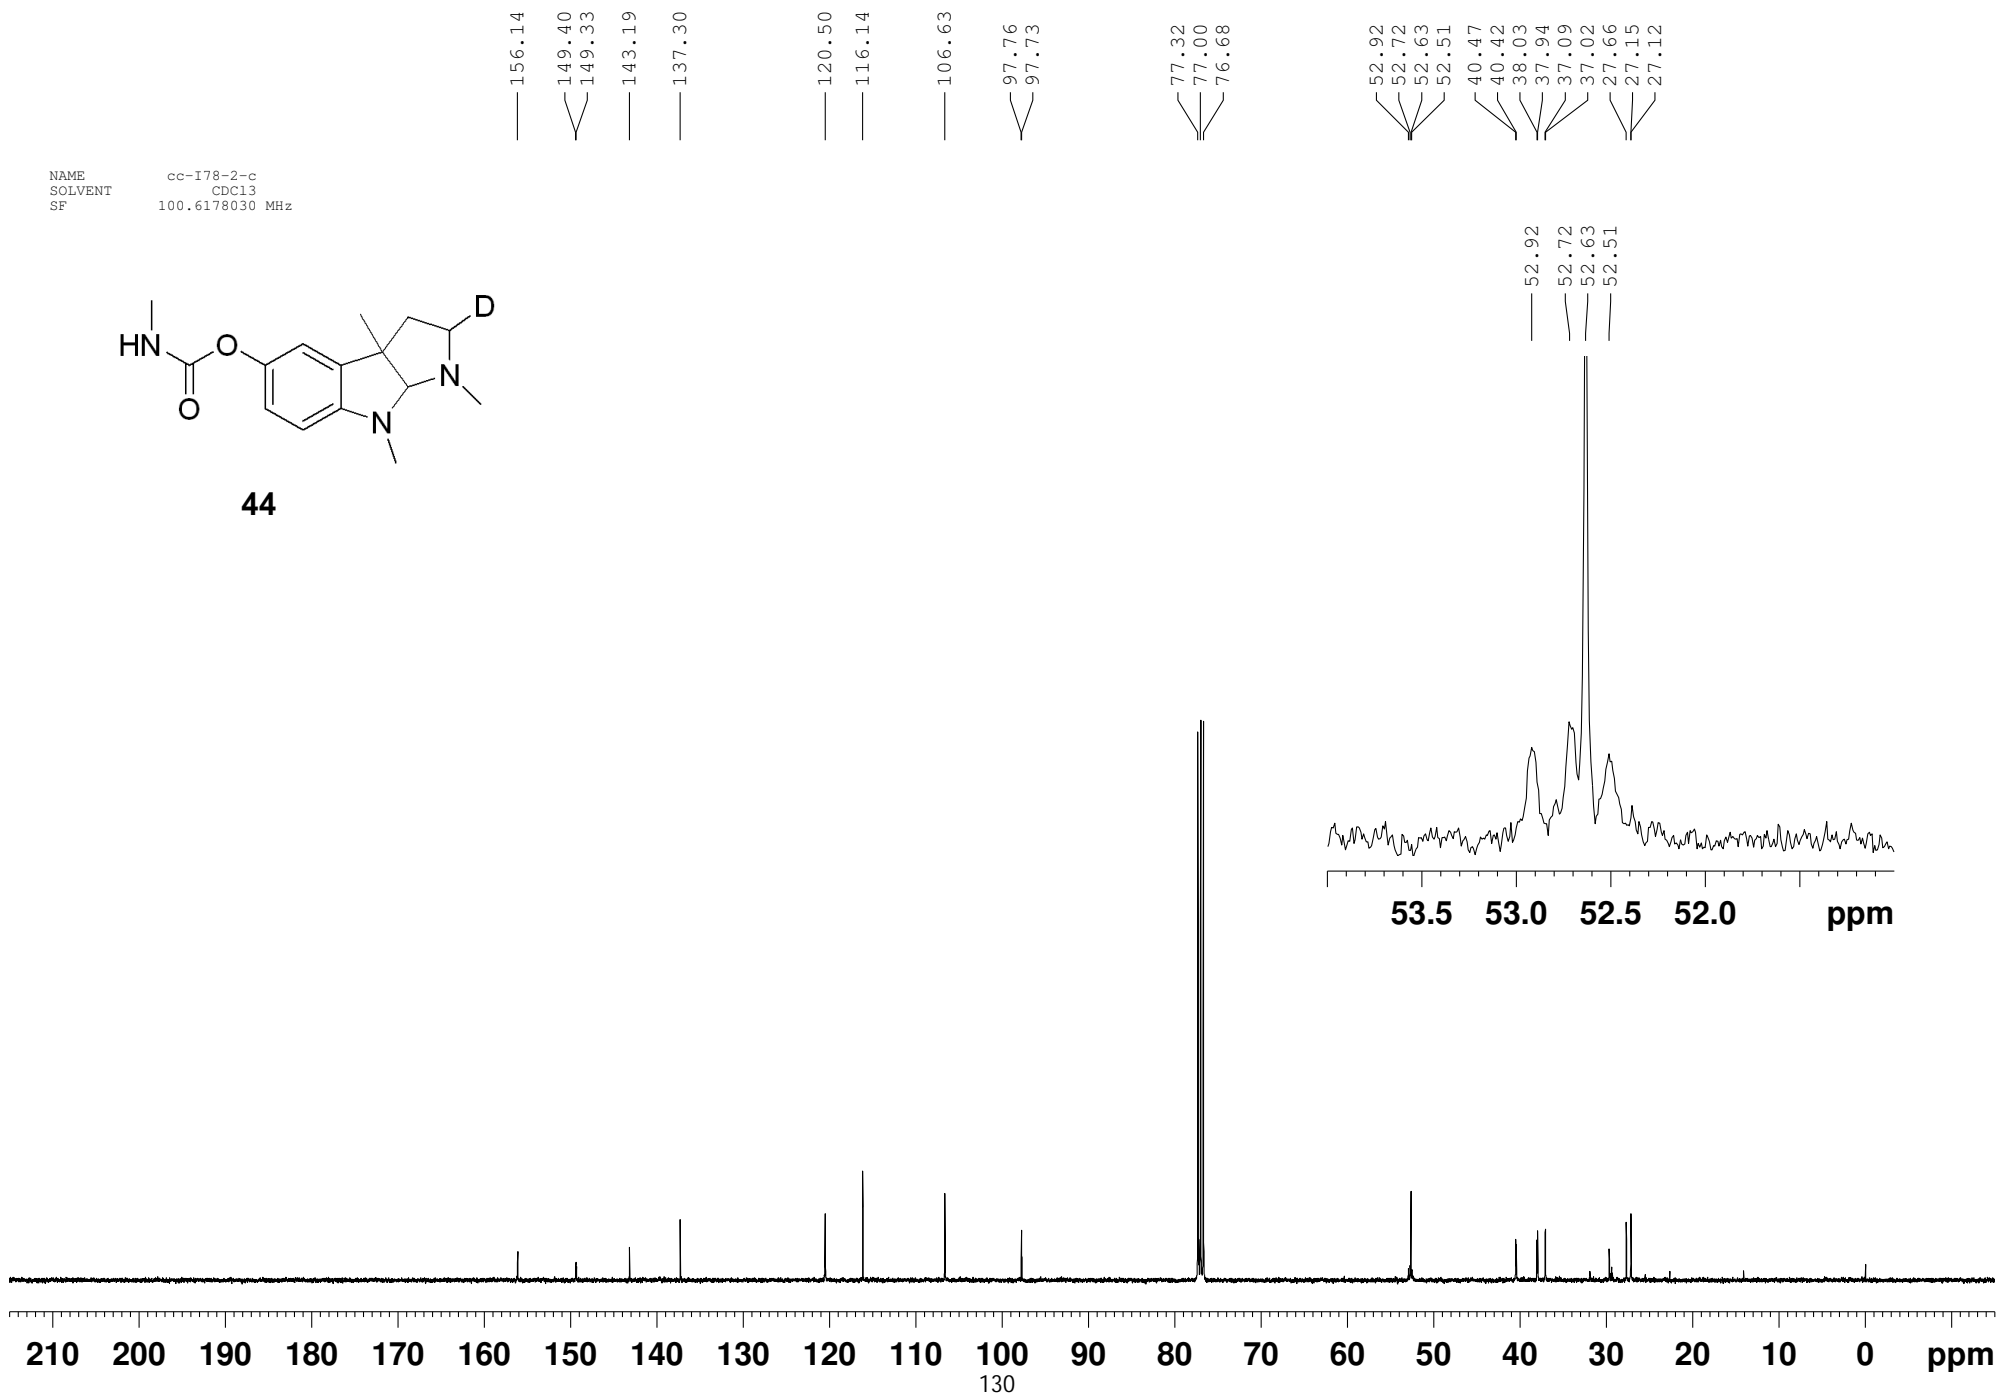

NAME CC-H47  
SOLVENT CDC13  
SF 400.1500102 MHz

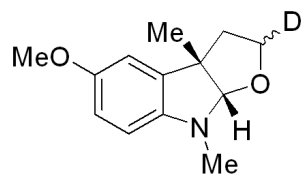

45

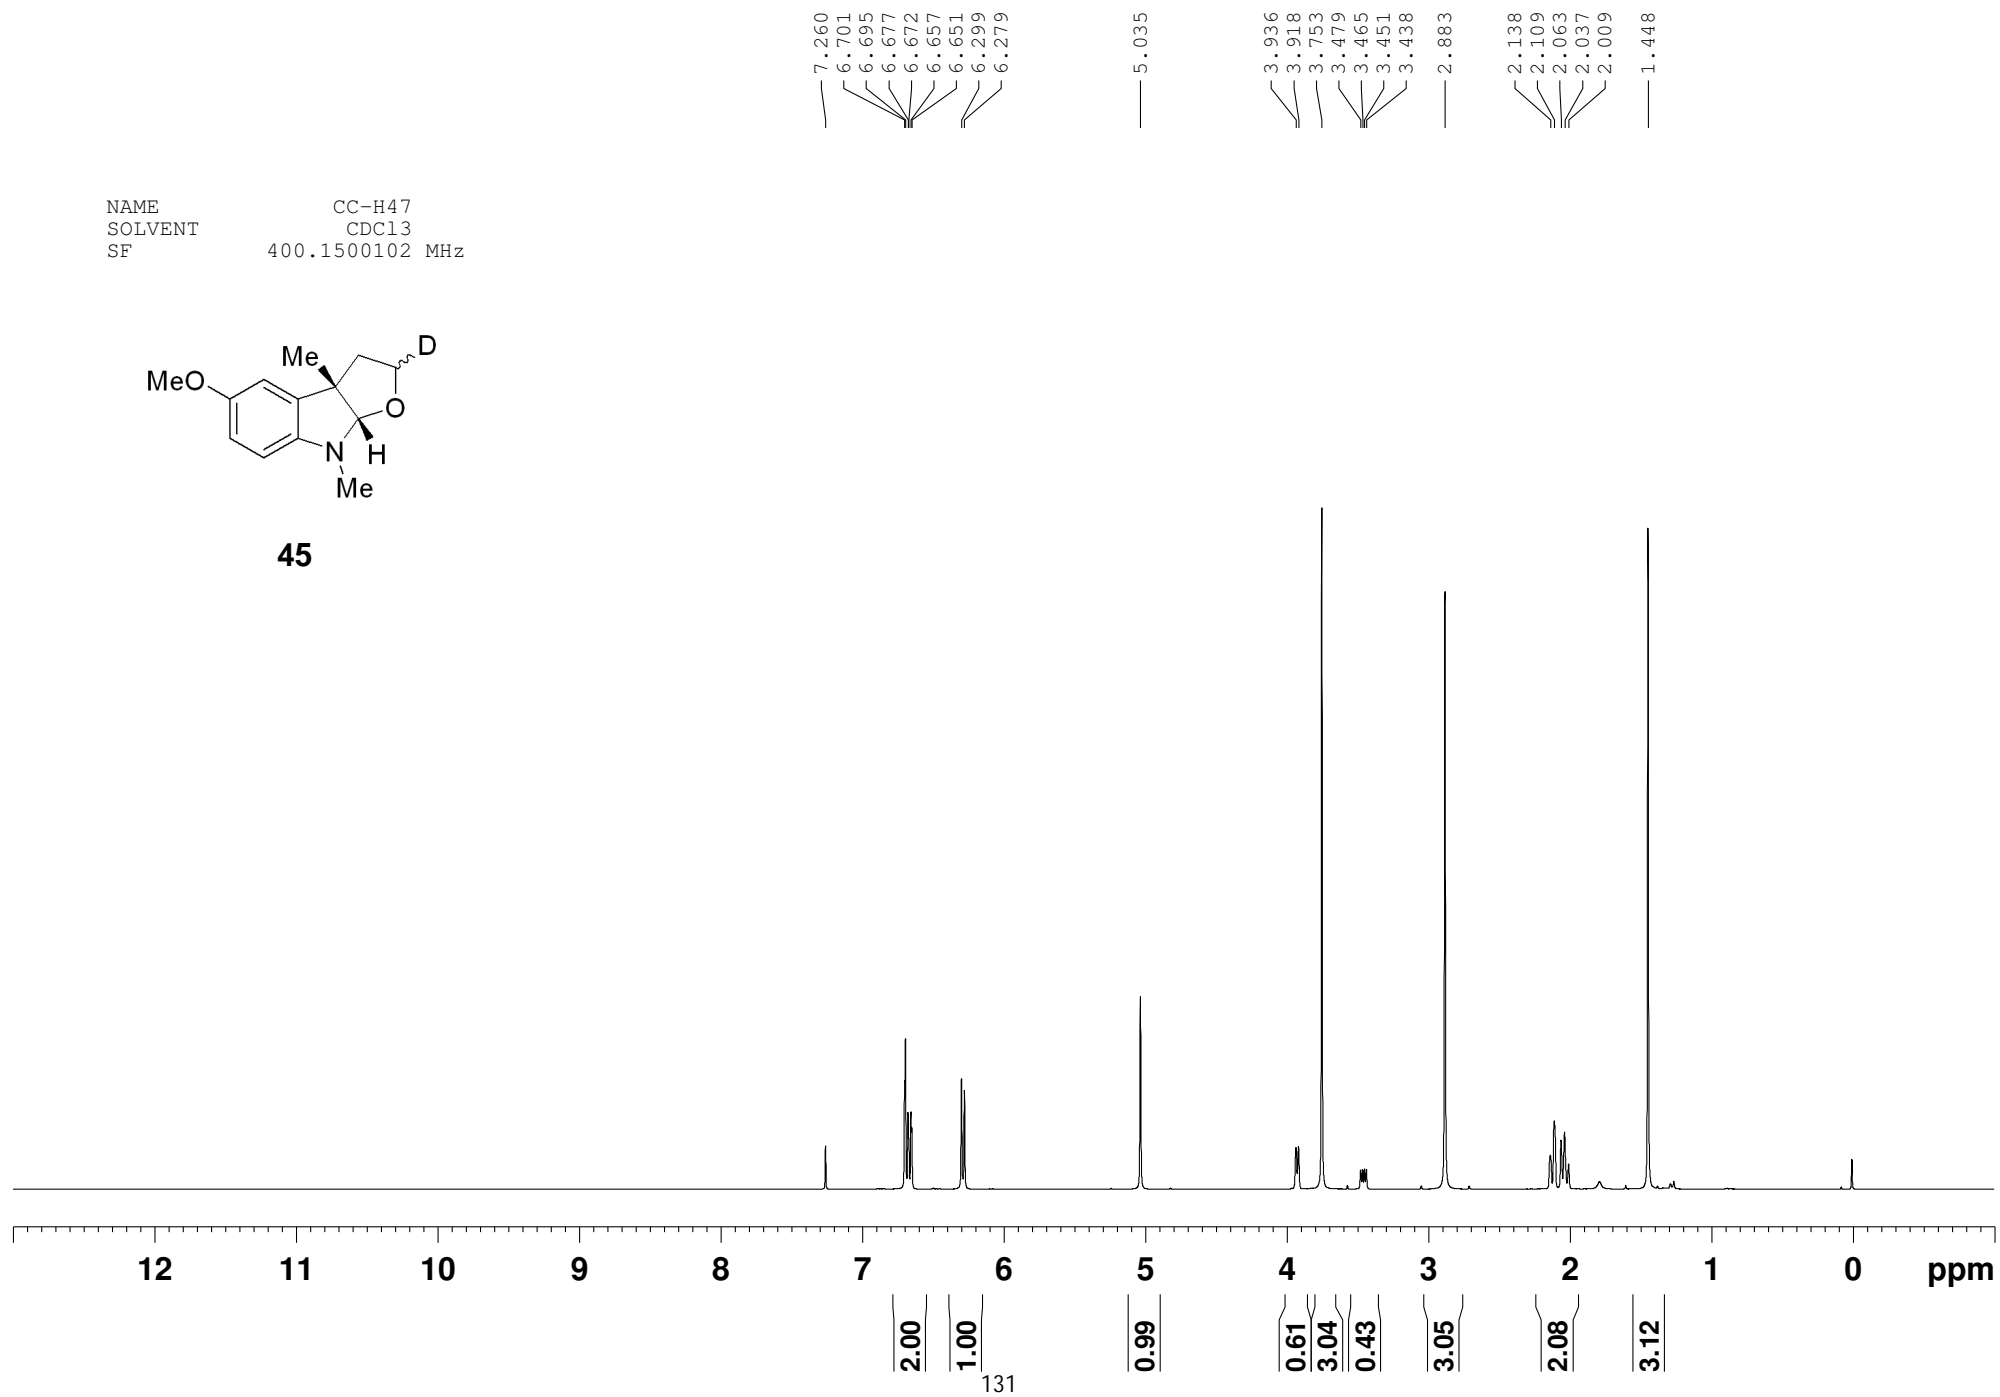

NAME CC-H47  
SOLVENT CDCl3  
SF 100.6178052 MHz

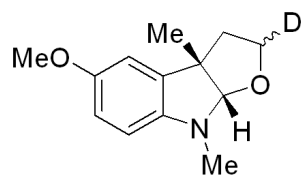

45

152.66  
144.89  
135.97  
112.09  
110.39  
105.56  
105.23  
77.32  
77.00  
76.68  
67.22  
67.00  
66.78  
56.00  
52.41  
41.29  
31.58  
24.43

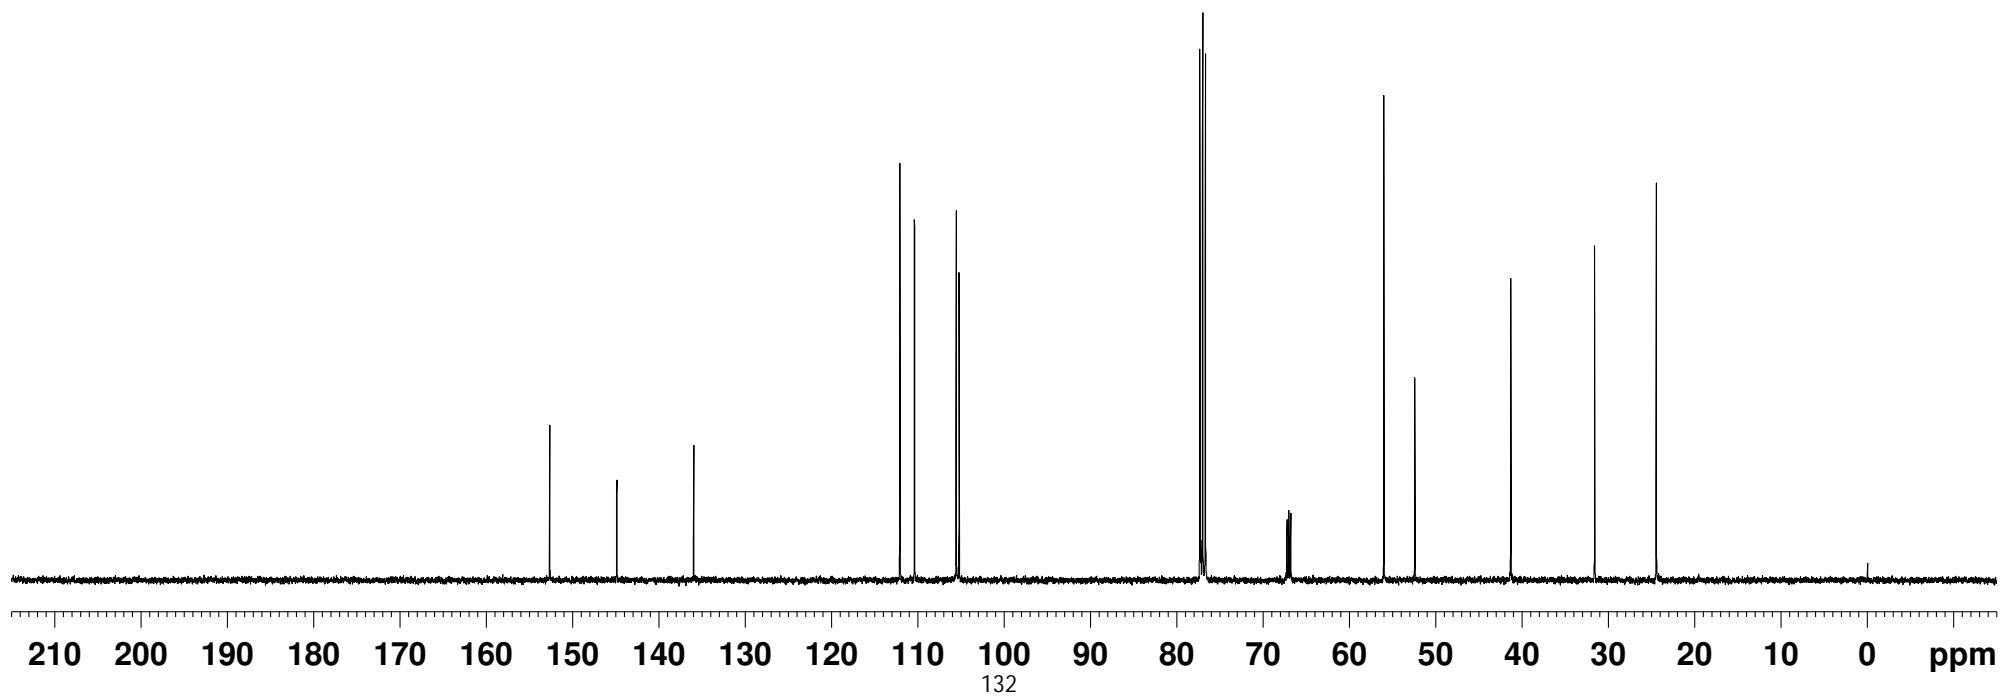

NAME CC-I119  
SOLVENT CDCl3  
SF 400.1499969 MHz

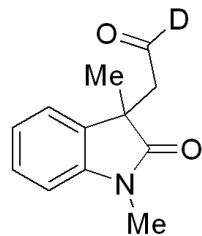

46

7.295  
7.291  
7.276  
7.273  
7.256  
7.253  
7.192  
7.190  
7.173  
7.172  
7.058  
7.056  
7.039  
7.037  
7.020  
7.018  
6.888  
6.868

3.250  
2.959  
2.955

1.408

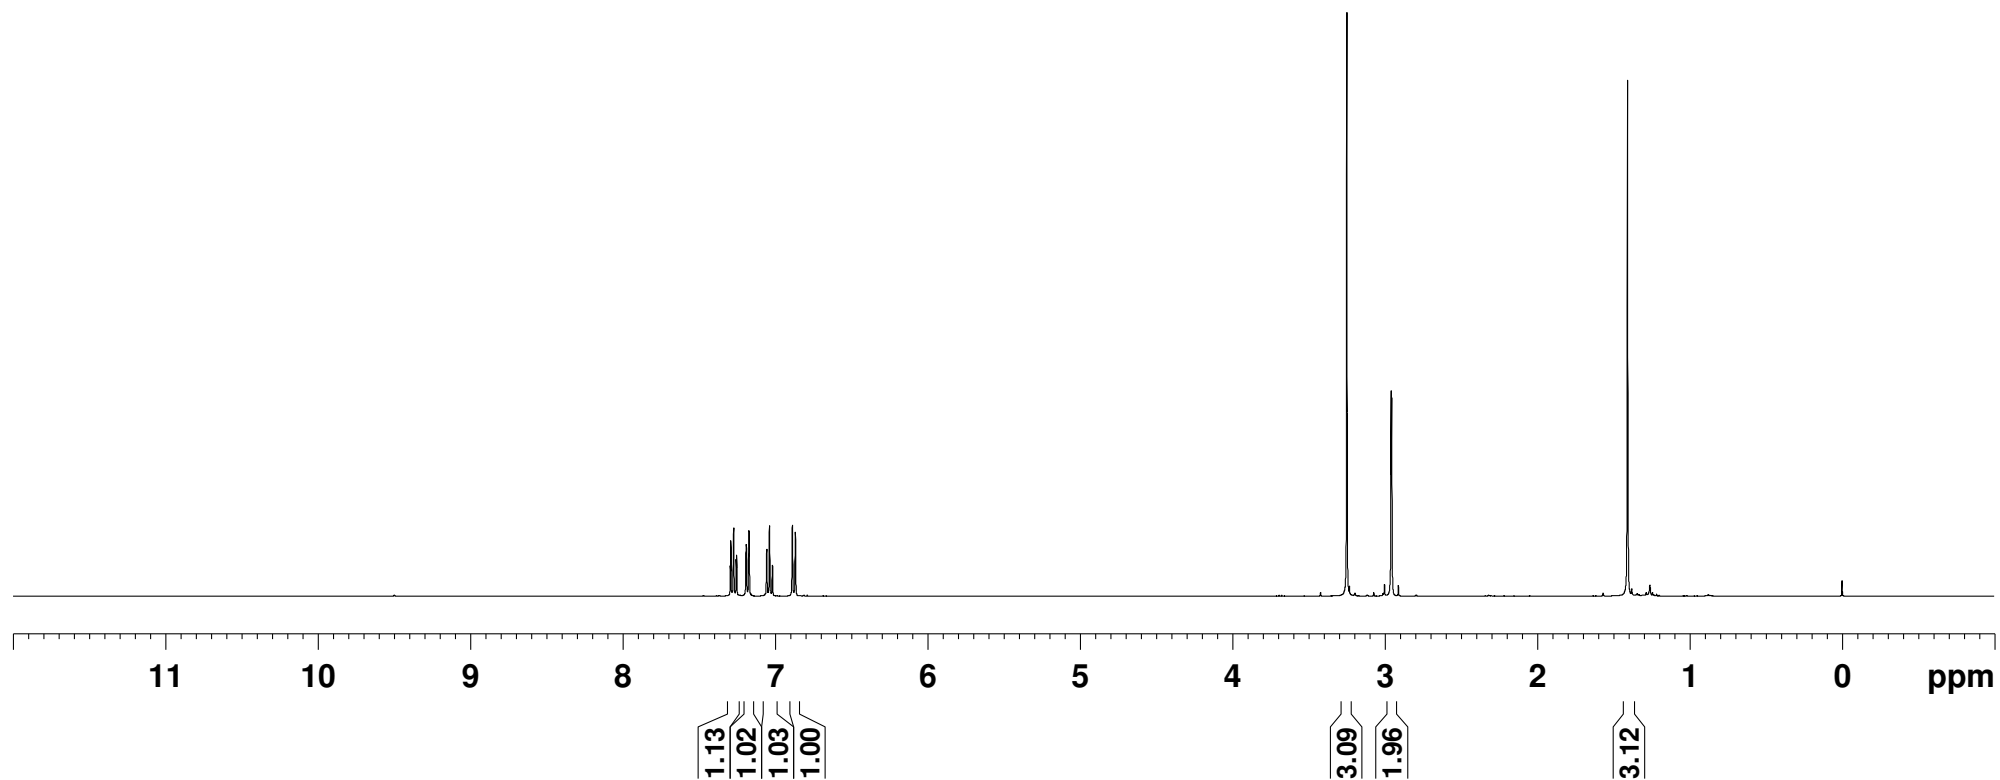

198.56  
198.30  
198.03

179.34

143.00

132.59

128.09

122.46  
122.24

108.19

77.32  
77.00  
76.68

50.21  
50.18  
50.14  
44.73

26.20  
23.76

NAME CC-1119  
SOLVENT CDCl3  
SF 100.6178169 MHz

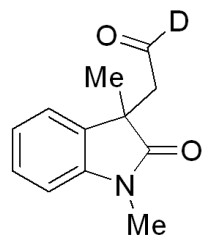

46

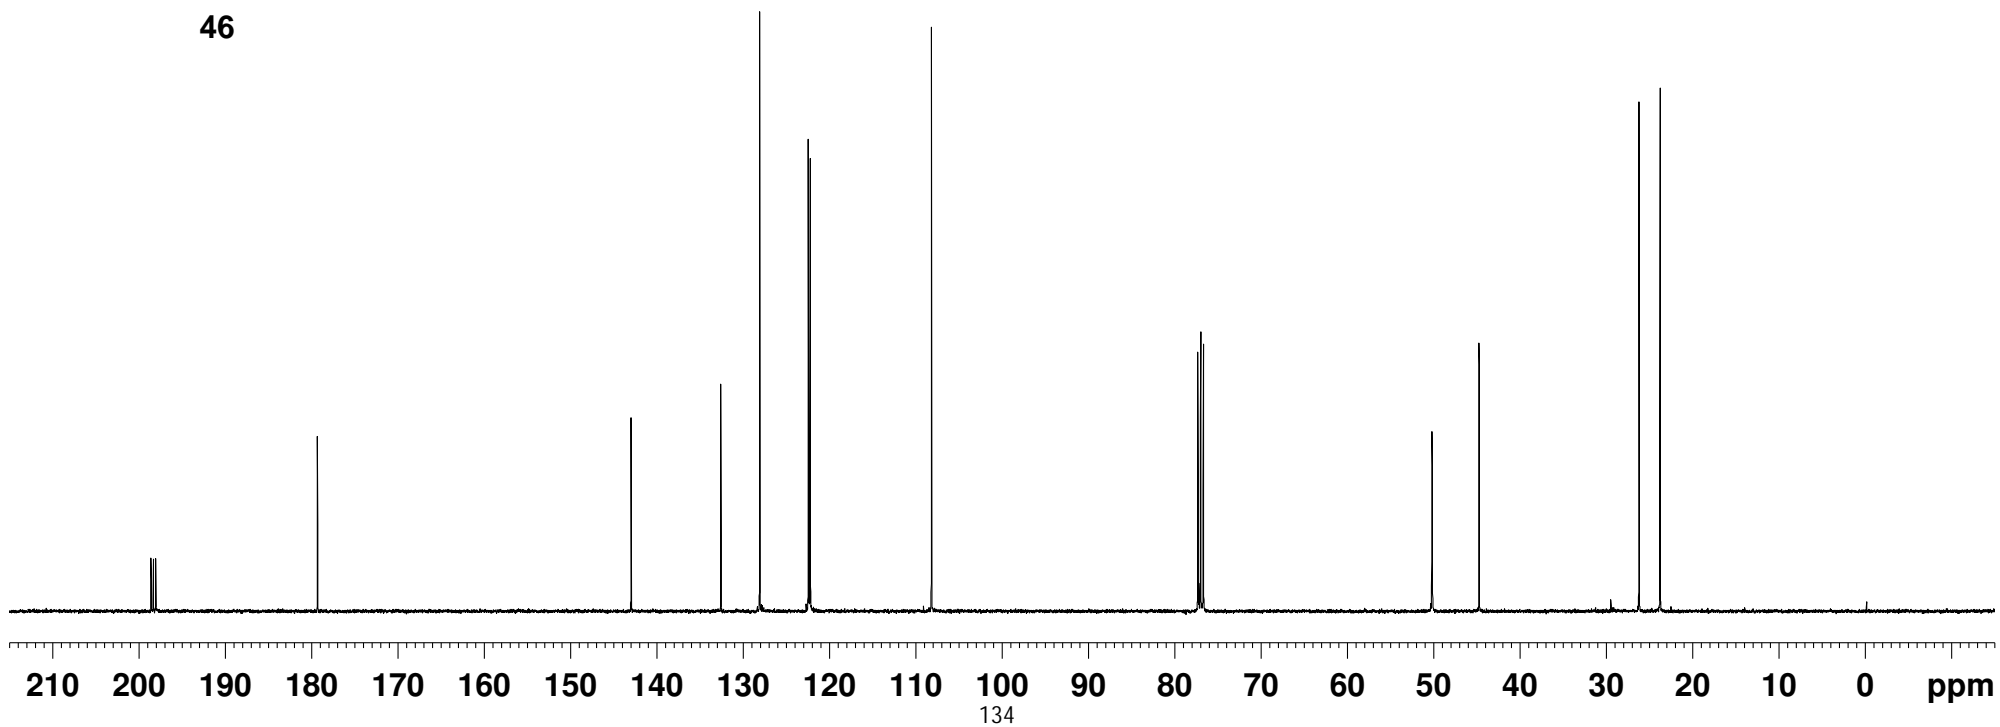

NAME cc-i52-0811  
SOLVENT CDCl3  
SF 400.1500089 MHz

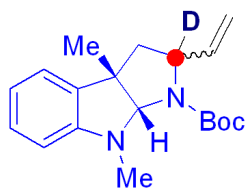

47

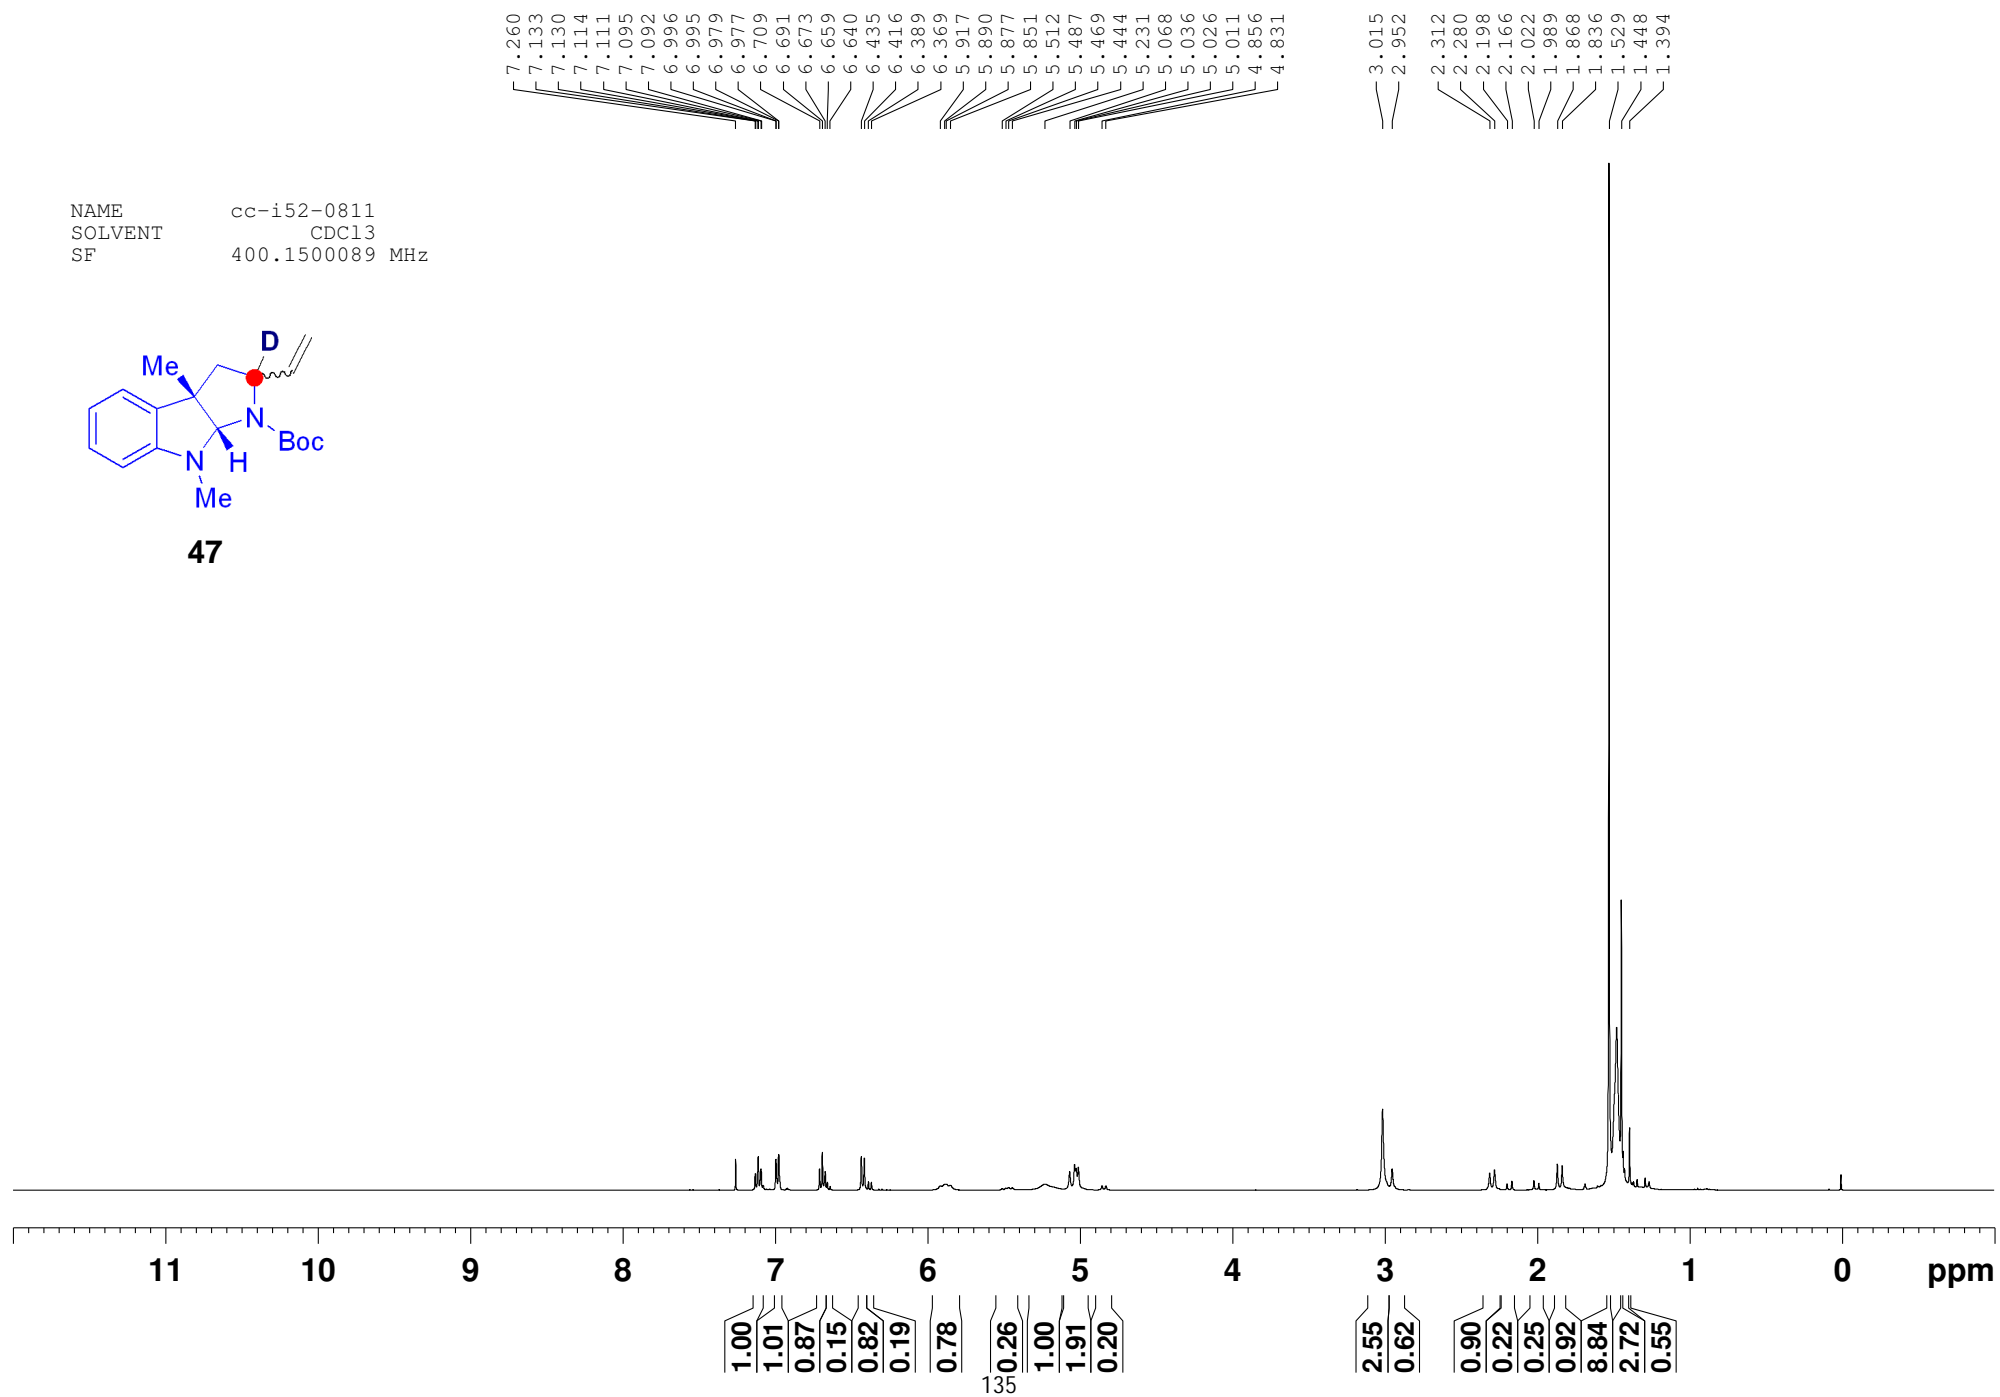

NAME cc-i52-0811  
SOLVENT CDCl3  
SF 100.6178089 MHz

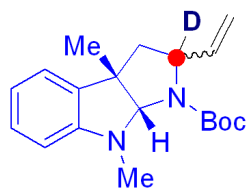

47

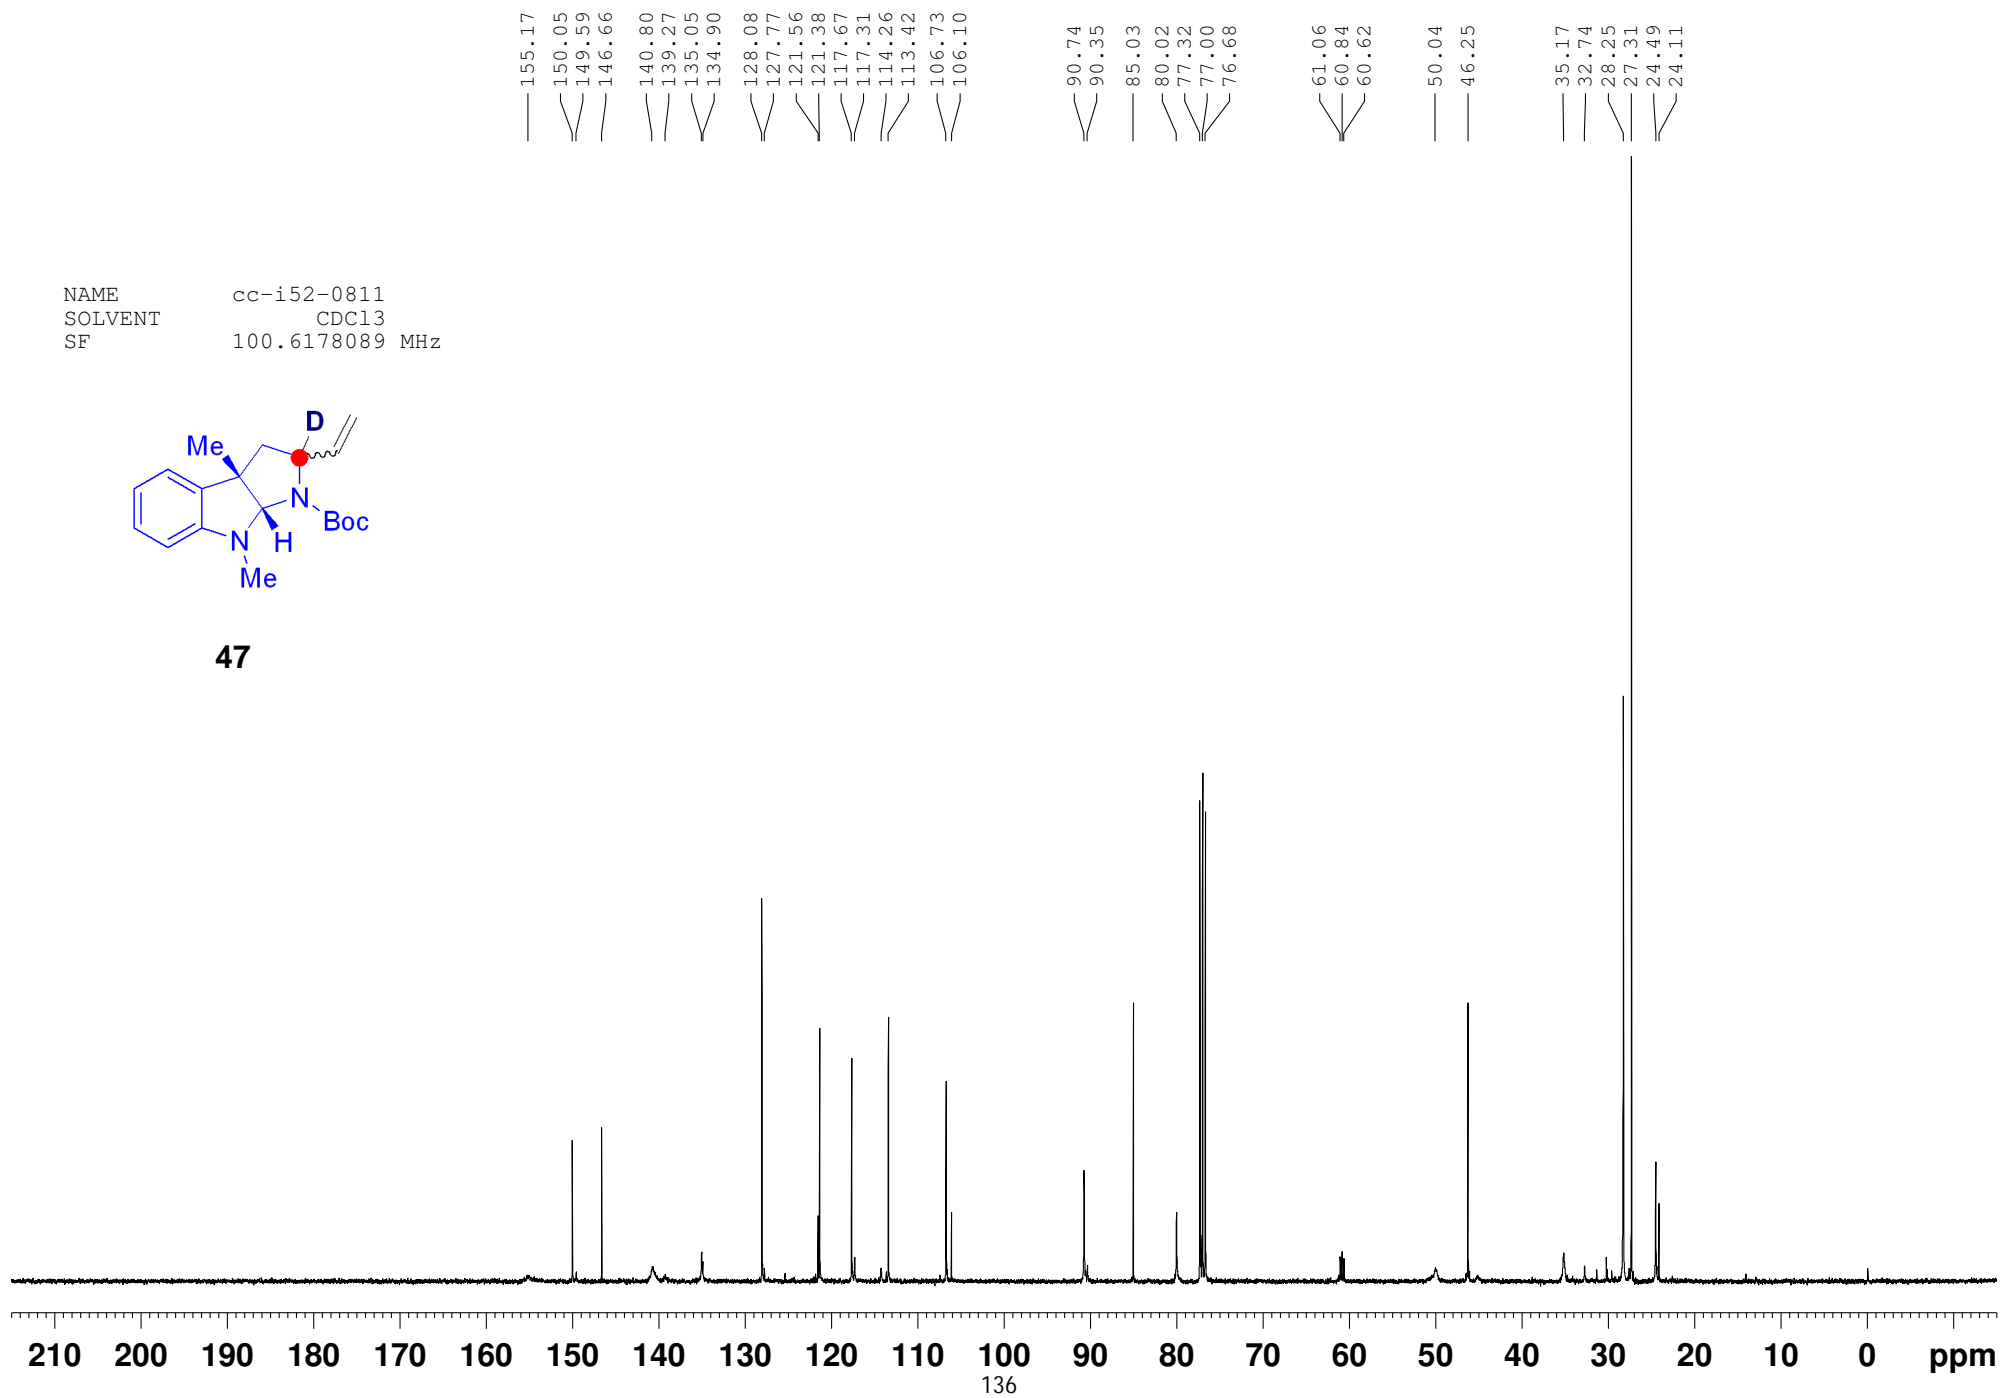



NAME cc-i54  
SOLVENT CDCl3  
SF 400.1500092 MHz

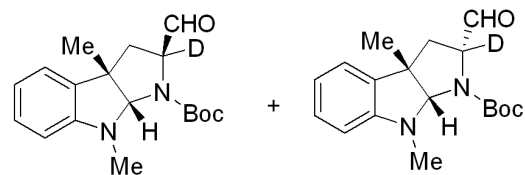

48

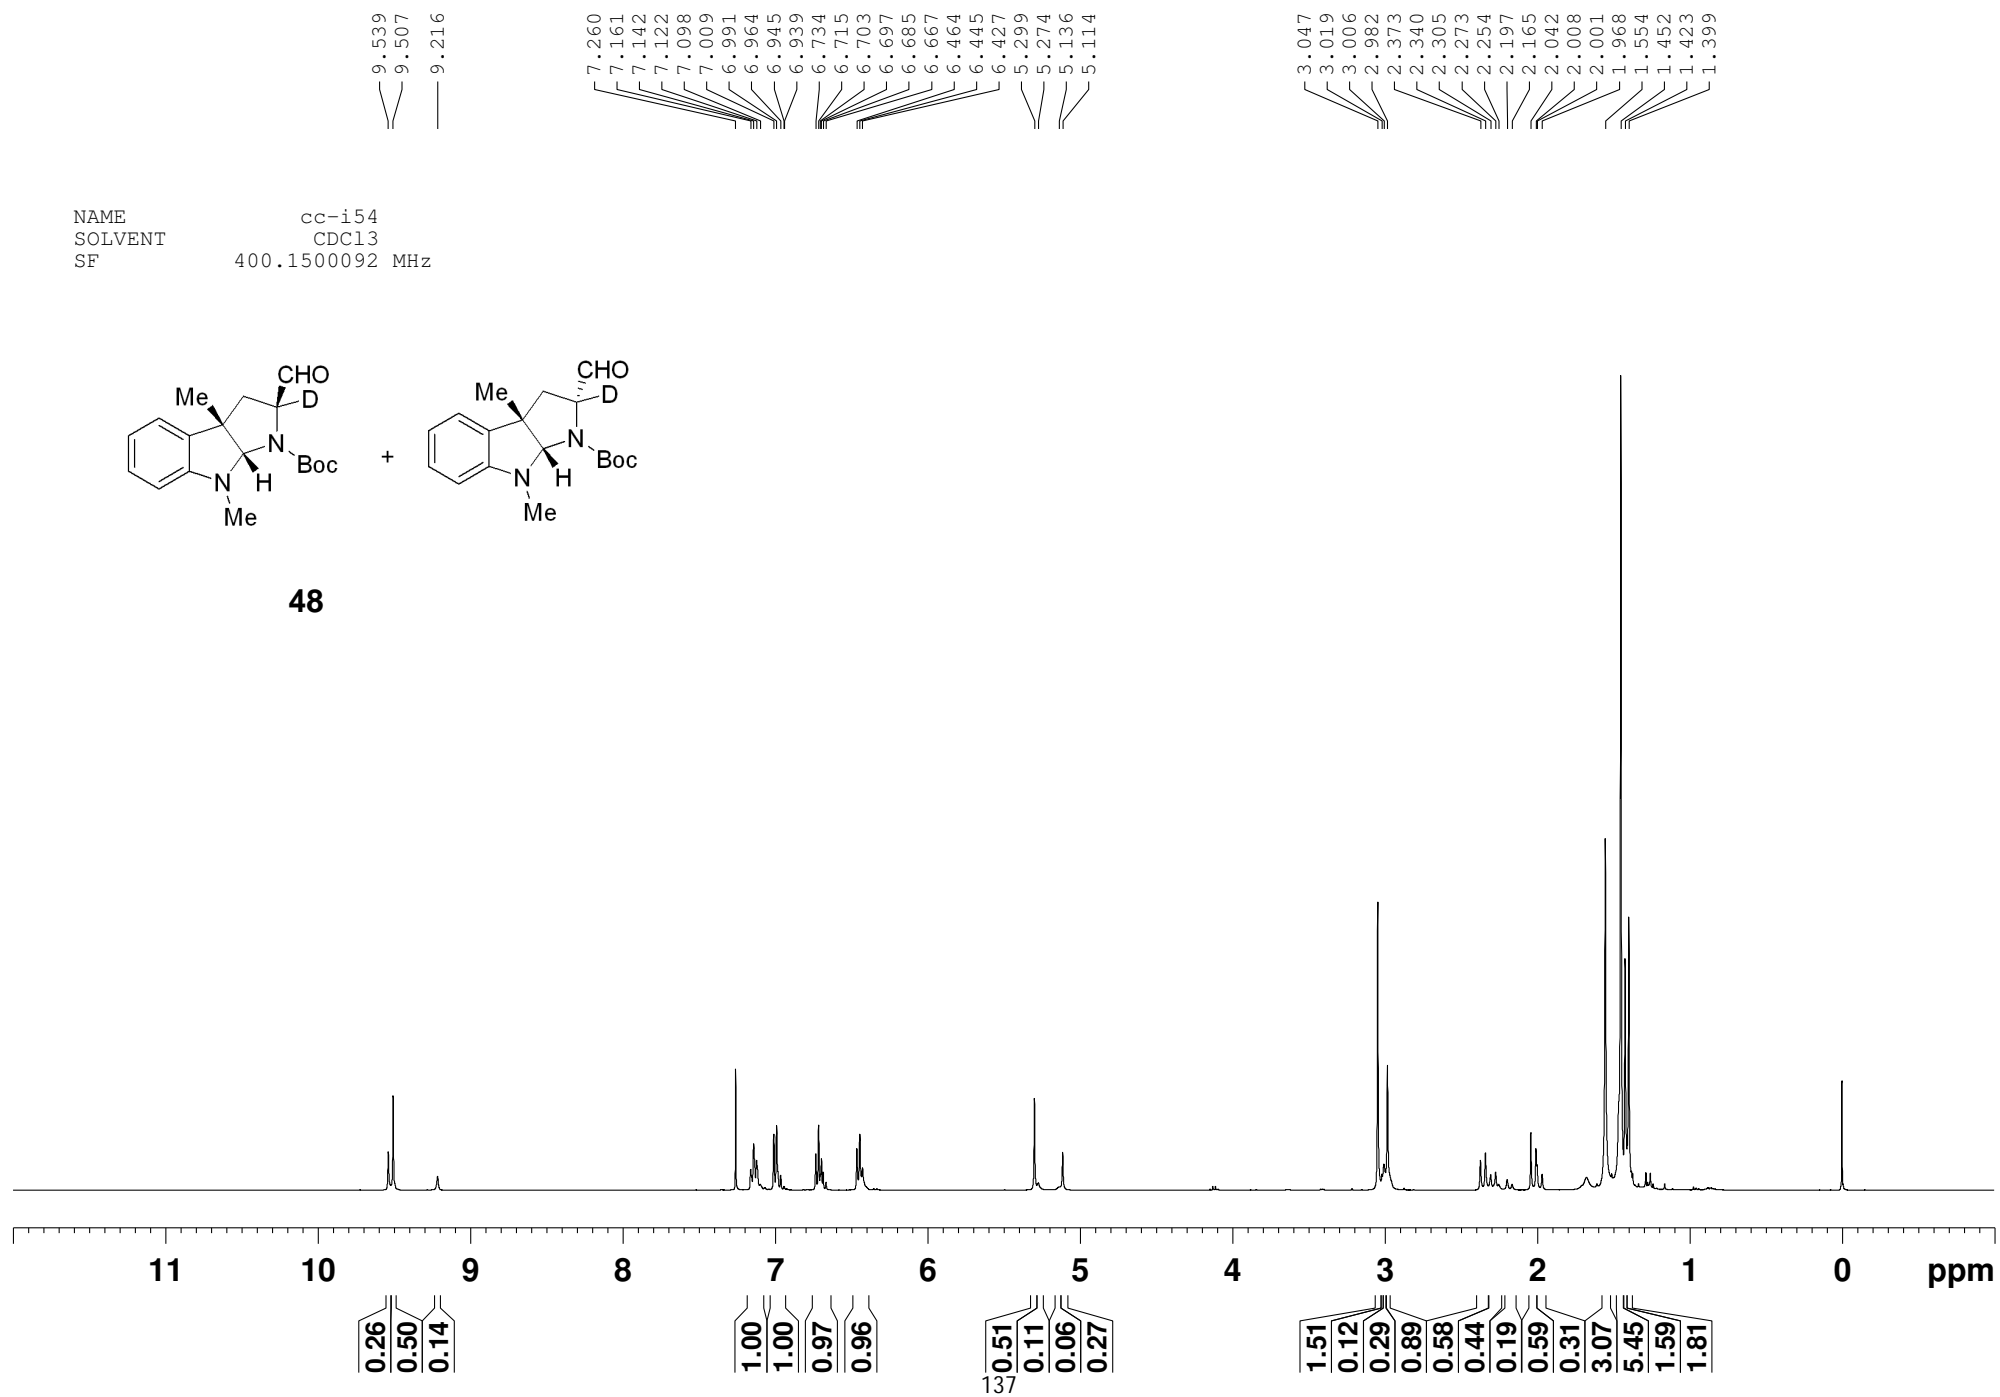

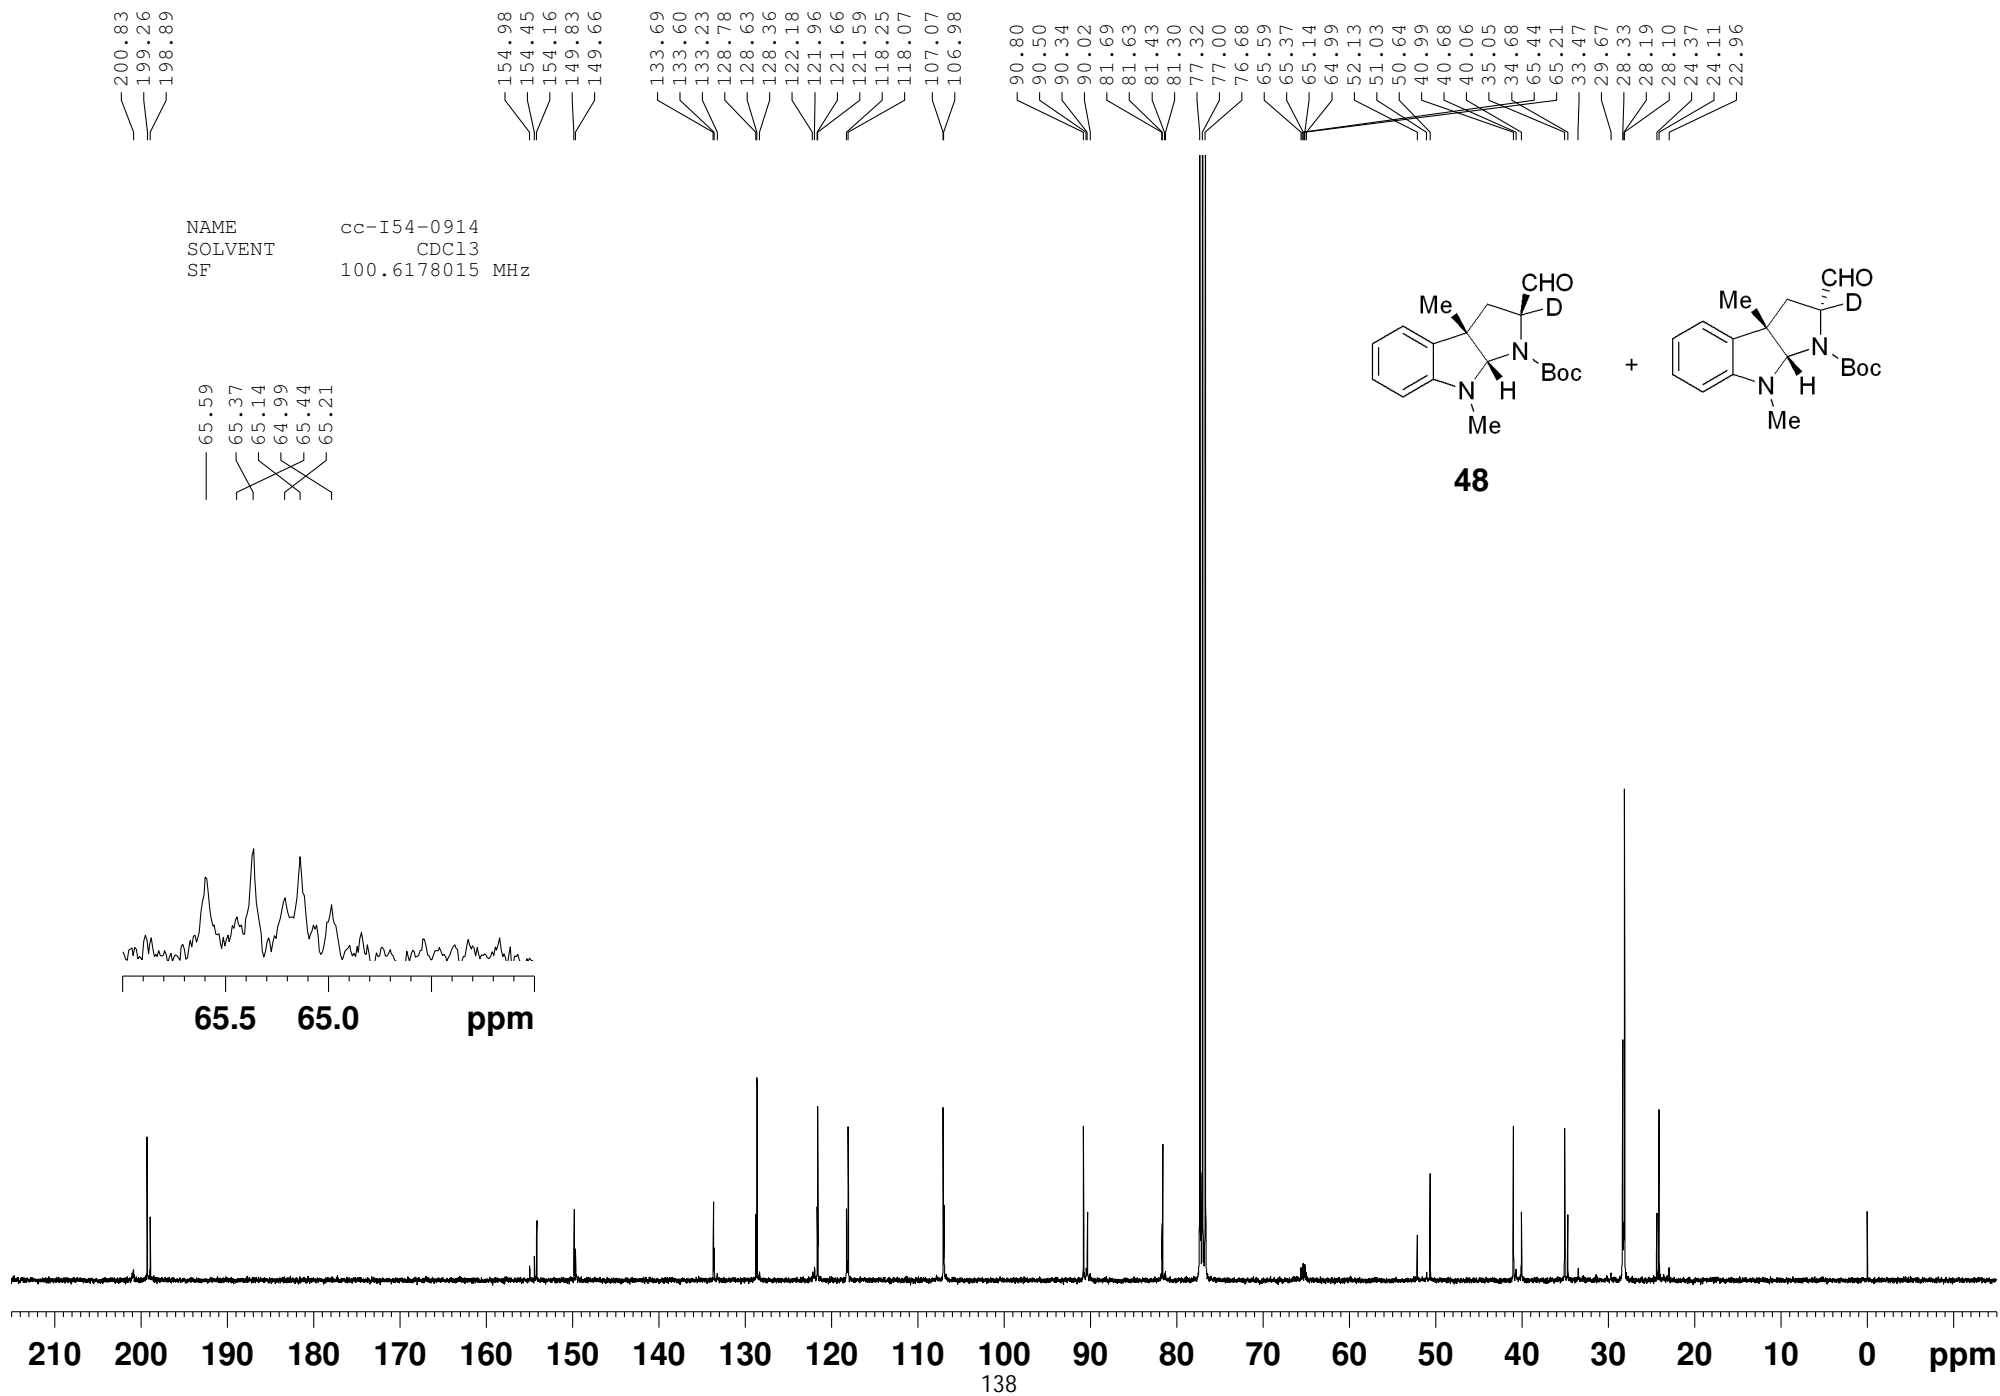

7.260  
7.114  
7.111  
7.094  
7.092  
7.084  
7.080  
7.075  
7.073  
7.064  
7.059  
7.048  
7.030  
7.014  
7.009  
6.716  
6.698  
6.680  
6.353  
6.333  
6.292  
6.271  
6.006  
5.979  
5.962  
5.936  
5.441  
5.420  
5.036  
5.032  
5.006  
5.003  
4.992  
4.989  
4.979  
4.976  
4.189  
4.174  
4.161  
4.146  
2.976  
2.951  
2.729  
2.710  
2.697  
2.678  
2.191  
2.184  
2.163  
2.160  
2.152  
2.132  
1.467  
1.463  
1.345

NAME cc-LansaiB-true  
SOLVENT CDCl3  
SF 400.1300097 MHz

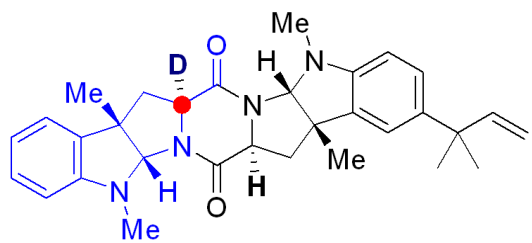

**50**  
(deuterated Lansai B)

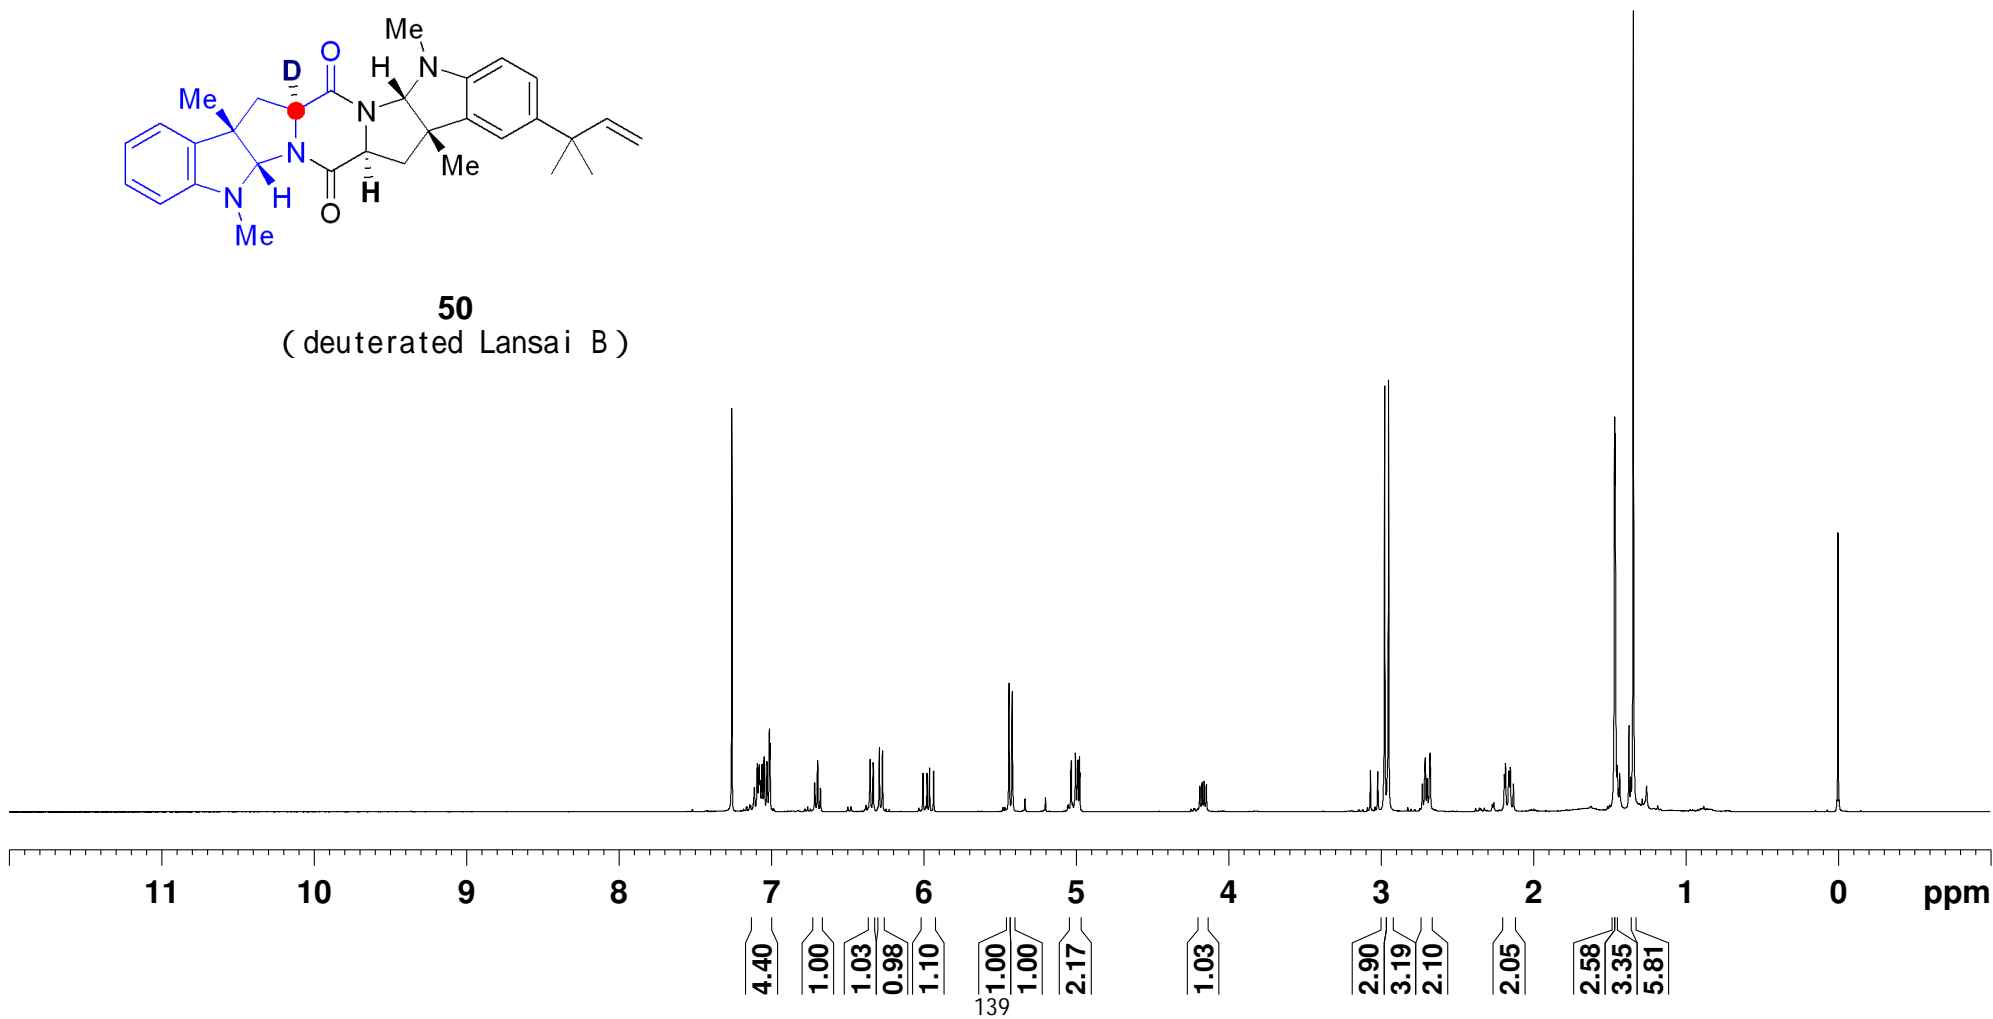

NAME cc-LansaiB-true  
SOLVENT CDCl3  
SF 100.6178001 MHz

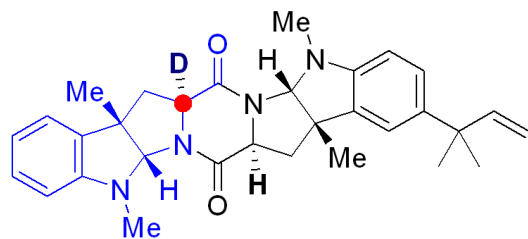

**50**  
( deuterated Lansai B )

165.75  
165.51

150.11  
148.57  
148.22

138.66

132.90

132.75

128.73

126.27

122.33

120.23

118.06

110.14

105.81

105.37

86.90  
86.54

77.32  
77.00  
76.68

60.12

50.45  
50.26

42.70  
42.63  
40.65

33.12  
32.90

28.50  
25.46  
25.41

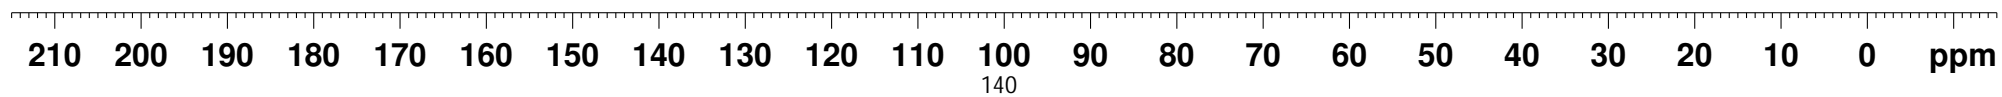

NAME cc-LansaiB-true  
SOLVENT CDCl3  
SF 176.0729771 MHz

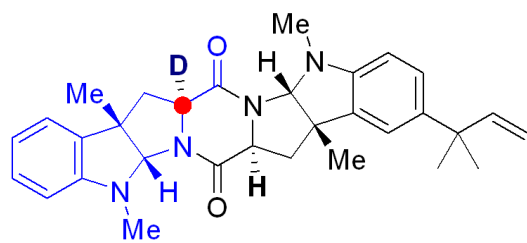

**50**  
( deuterated Lansai B )

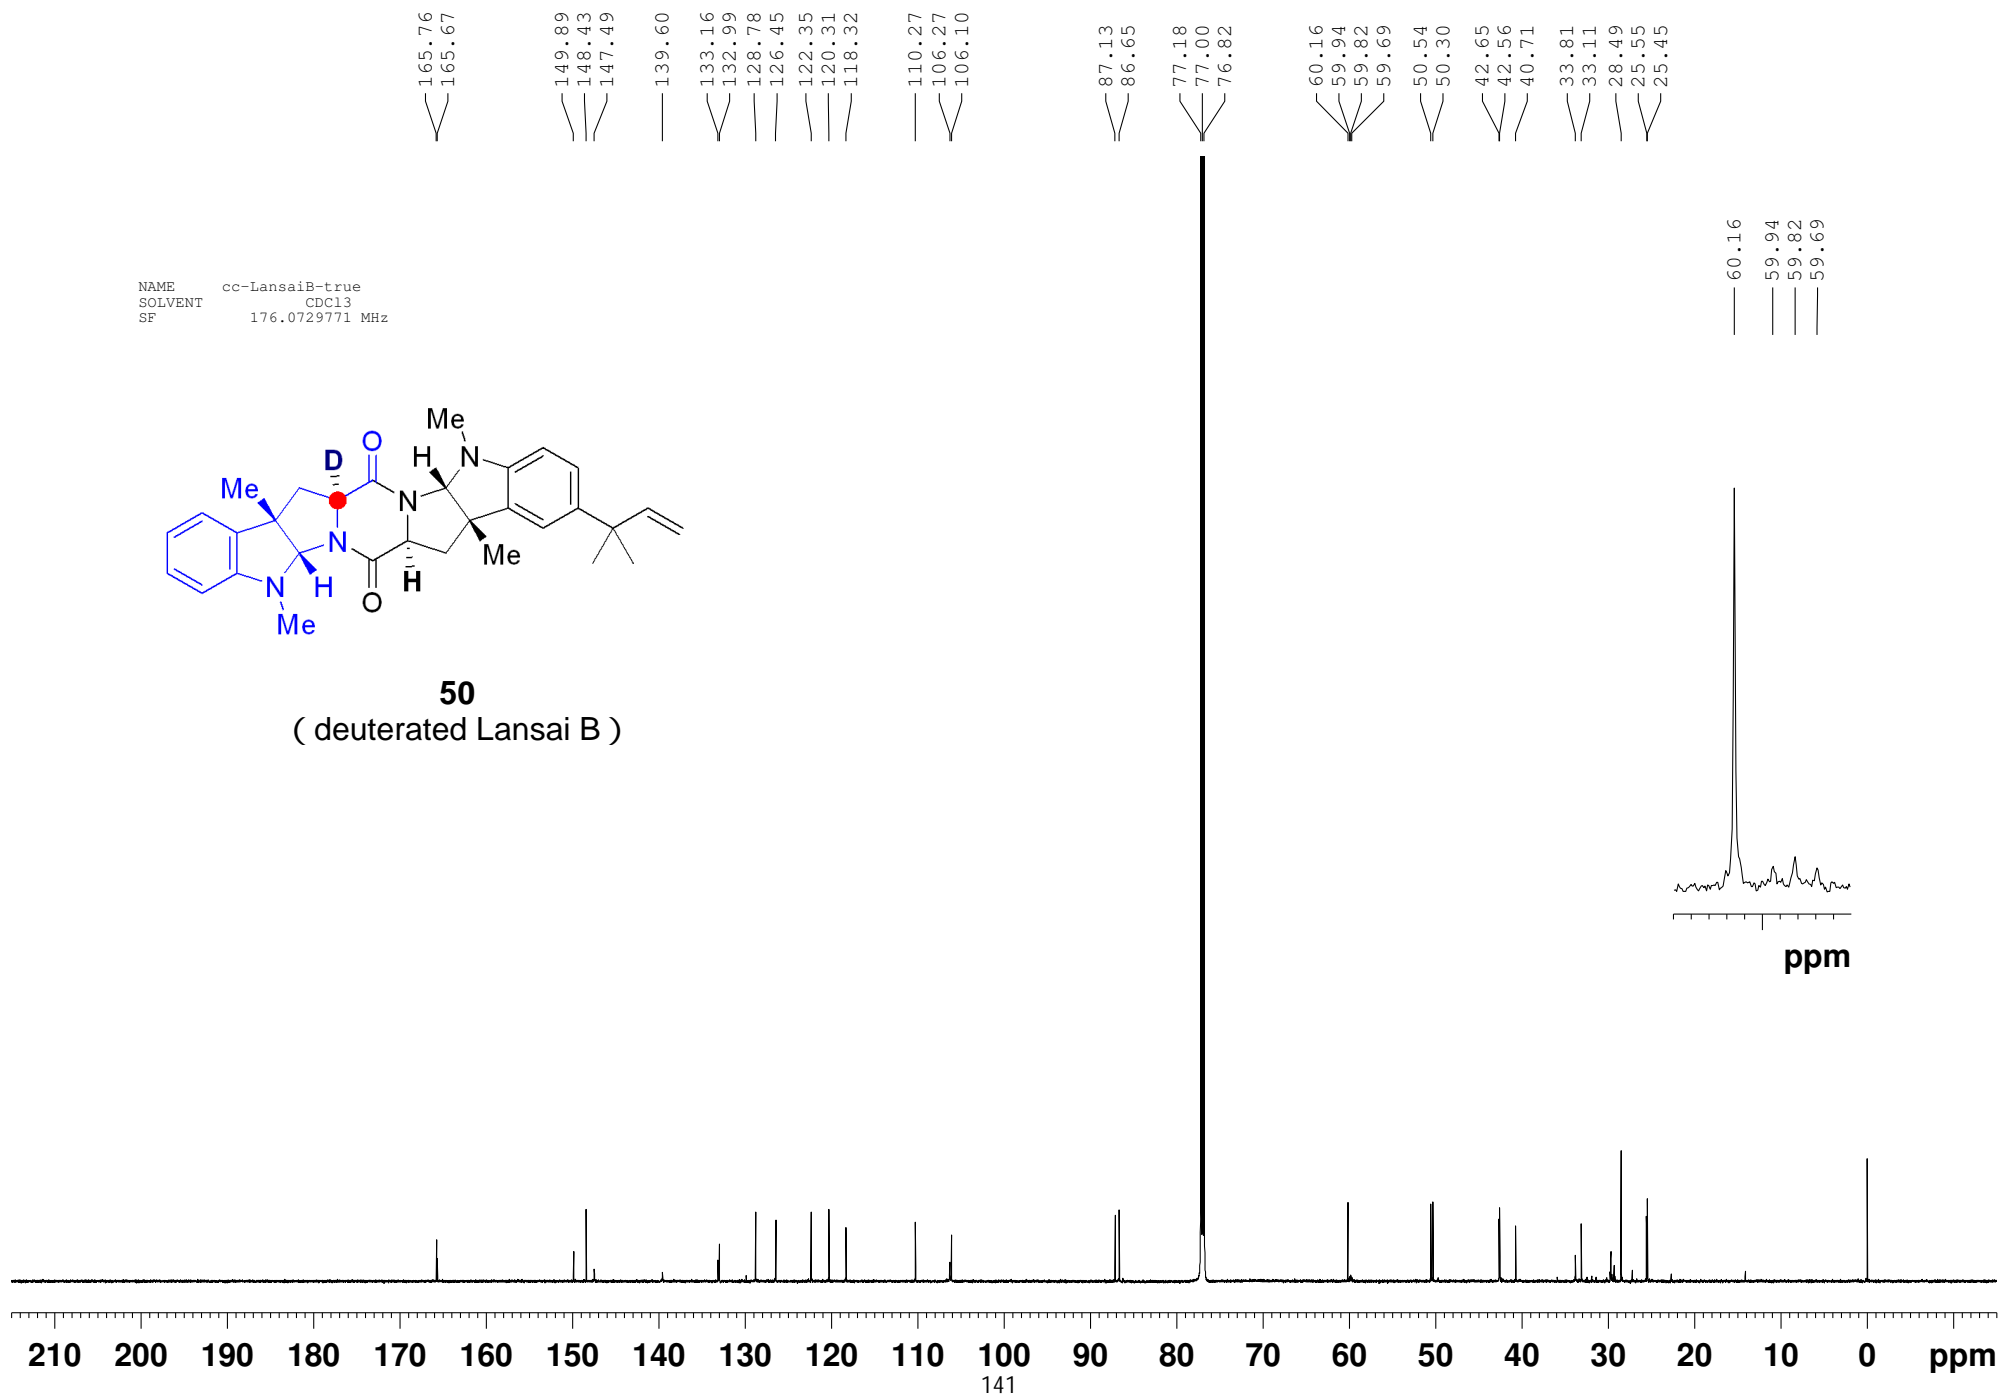

NAME cc-I80-T  
SOLVENT CDCl3  
SF 400.1500092 MHz

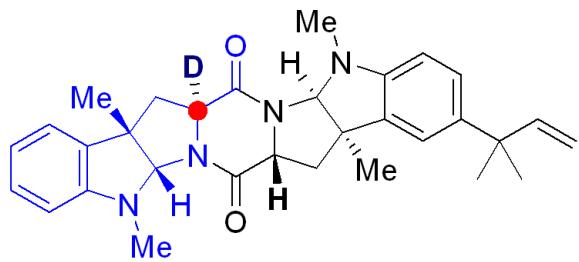

51

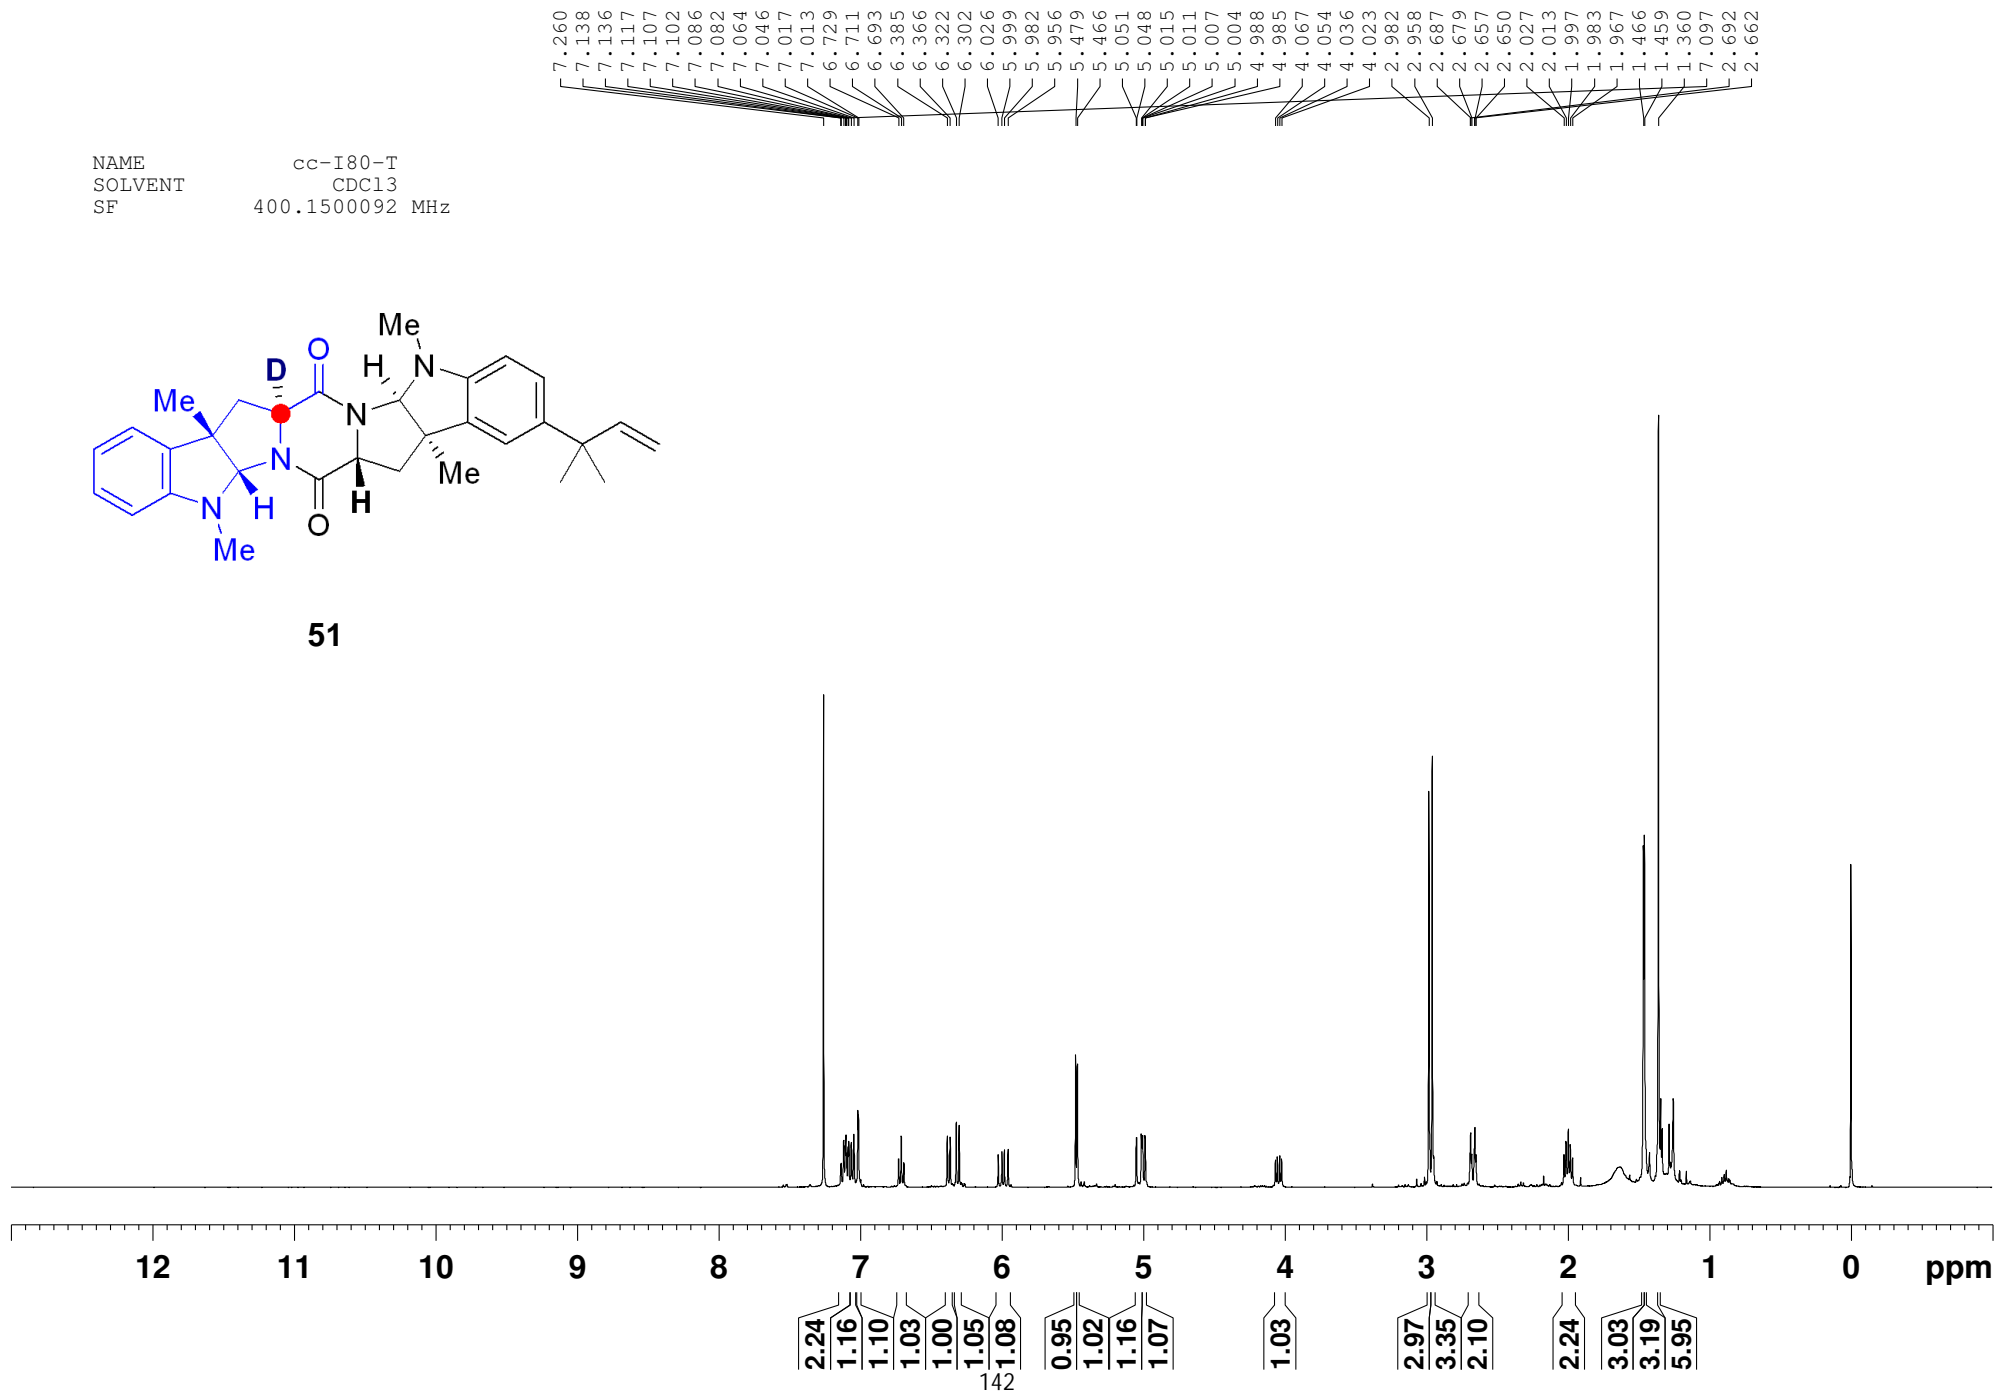

NAME cc-I80-T  
SOLVENT CDCl3  
SF 176.0729789 MHz

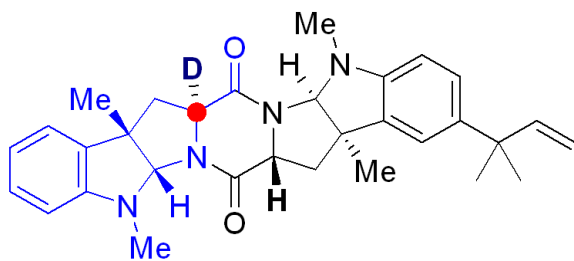

51

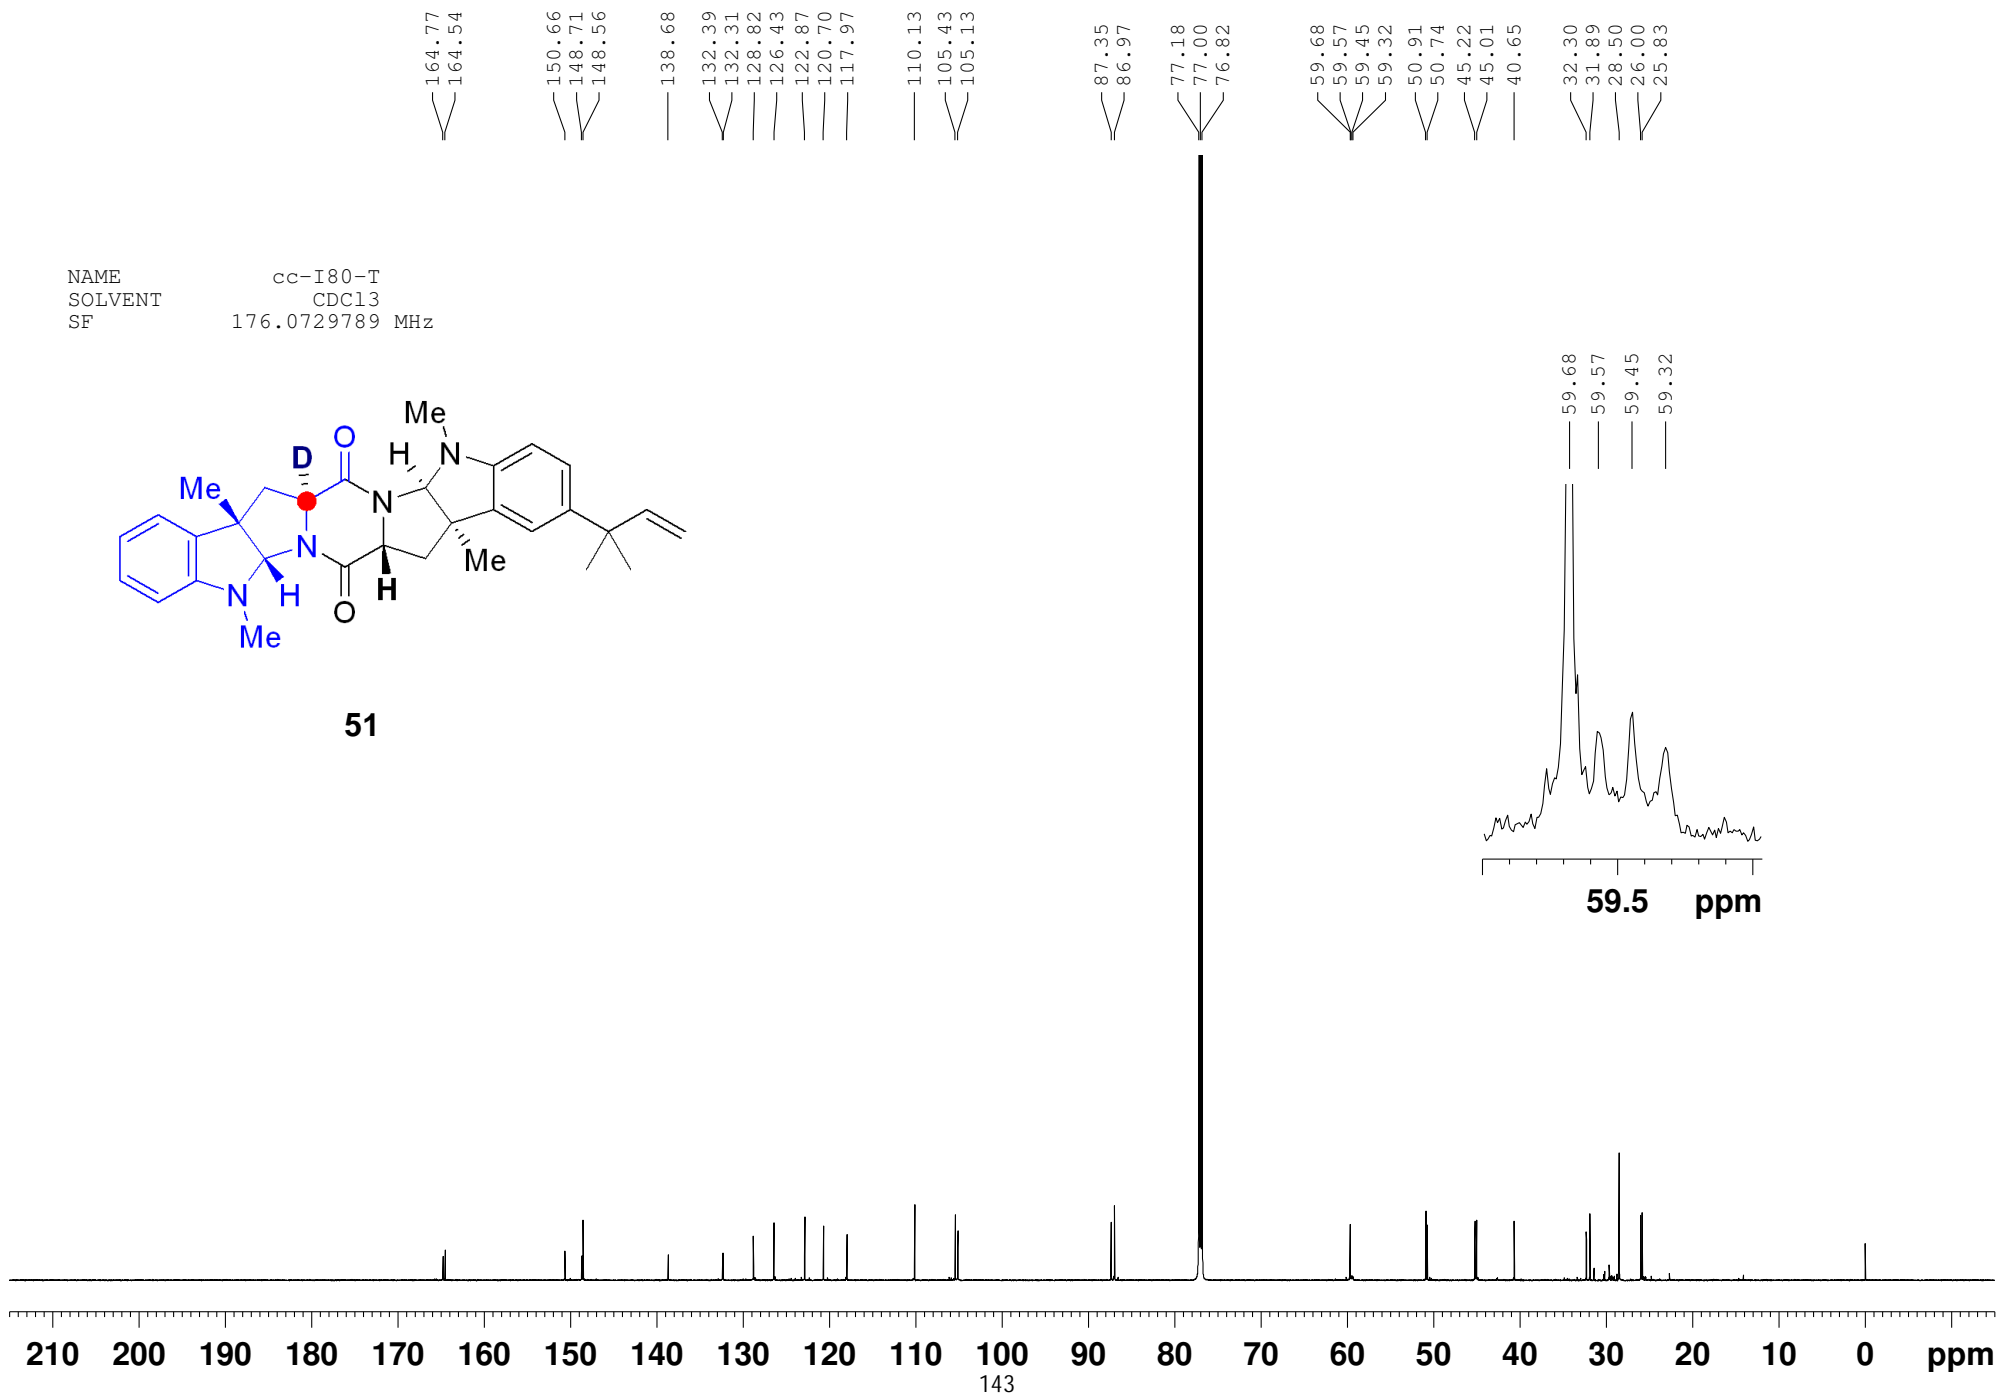

Supplement: d2cc03301a1.pdf [file d2cc03301a1.pdf]
